# Supplementary material for: Comparison of microbial strains as candidate hosts and genetic reservoirs for the valorization of lignin streams
Source: Royal Society of Chemistry journal article supplement (doi:10.1039/d4gc03876b), 2024-01-01
Supplement: d4gc03876b1.pdf [file d4gc03876b1.pdf]

## Comparison of microbial strains as candidate hosts and genetic reservoirs for the valorization of lignin streams

Rebecca A. Wilkes,<sup>1,2</sup> Andrew J. Borchert,<sup>1,2</sup> Valentina E. Garcia,<sup>3,4</sup> Gina M. Geiselman,<sup>3,4</sup> Sarah Liu,<sup>5</sup> Adam M. Guss,<sup>2,6</sup> Joshua K. Michener,<sup>2,6</sup> Daniel R. Noguera,<sup>5</sup> Eiji Masai,<sup>7</sup> John M. Gladden,<sup>3,4</sup> John Ralph,<sup>5</sup> Gregg T. Beckham<sup>1,2\*</sup>

1. Renewable Resources and Enabling Sciences Center, National Renewable Energy Laboratory, Golden, CO 80401, USA
2. Center for Bioenergy Innovation, Oak Ridge National Laboratory, Oak Ridge, TN, USA
3. Joint BioEnergy Institute, Lawrence Berkeley National Laboratory, Emeryville, CA 94608, USA
4. Biomanufacturing and Biomaterials Department, Sandia National Laboratories, Livermore, CA 94550, USA
5. Great Lakes Bioenergy Research Center, University of Wisconsin-Madison, Madison, Wisconsin, USA
6. Biosciences Division, Oak Ridge National Laboratory, Oak Ridge, TN, 37830, USA
7. Department of Materials Science and Bioengineering, Nagaoka University of Technology, Nagaoka, Niigata 940-2188, Japan

### Table of Contents

|                                                                                                                                                                                     |    |
|-------------------------------------------------------------------------------------------------------------------------------------------------------------------------------------|----|
| <b>Fig. S1.</b> Growth dynamics of all seven microbial strains grown on 10% or 25% mock APL and the six tested minimal media. ....                                                  | 2  |
| <b>Fig. S2.</b> Comparison of (A) essential nutrients, (B) cumulative salt additives, and (C) other trace metals in the six different media recipes.....                            | 3  |
| <b>Fig. S3.</b> Growth dynamics, maximum absolute growth rates (growth rate), and lag times for the six bacterial strains grown on favorable carbon sources plus NaCl or DMSO ..... | 5  |
| <b>Fig. S4.</b> Growth dynamics, maximum absolute growth rates (growth rate), and lag times for the NBRC0880 compared to KT2440 on 20 mM glucose plus NaCl or DMSO.....             | 5  |
| <b>Fig. S5.</b> Growth comparison of KT2440 in 1 mL culture volumes (light grey) compared to KT2440 in 0.2 mL culture volumes (dark grey). ....                                     | 7  |
| <b>Fig. S6.</b> The concentration of lignin (g/L) measured in the lyophilized supernatant.....                                                                                      | 7  |
| <b>Fig. S7.</b> The sum, in mM of carbon, of all measured aromatic and aliphatic acids present in the supernatant after 120 h. ....                                                 | 8  |
| <b>Fig. S8.</b> Measured pH of APL media after 120 h of inoculation with the different microbial strains.....                                                                       | 8  |
| <b>Fig. S9.</b> Depletion profiles of the summed total of measured aromatic acids (red) and aliphatic acids (blue) over time for each strain. ....                                  | 9  |
| <b>Fig. S10.</b> Low molecular mass distribution of APL abiotic control compared to aromatic compound standards.....                                                                | 10 |
| <b>Table S1.</b> Chemical components of all minimal media recipes.....                                                                                                              | 11 |
| <b>Table S2.</b> Total ionic content of each minimal media recipe .....                                                                                                             | 13 |
| <b>Table S3.</b> APL compositional analysis.....                                                                                                                                    | 13 |

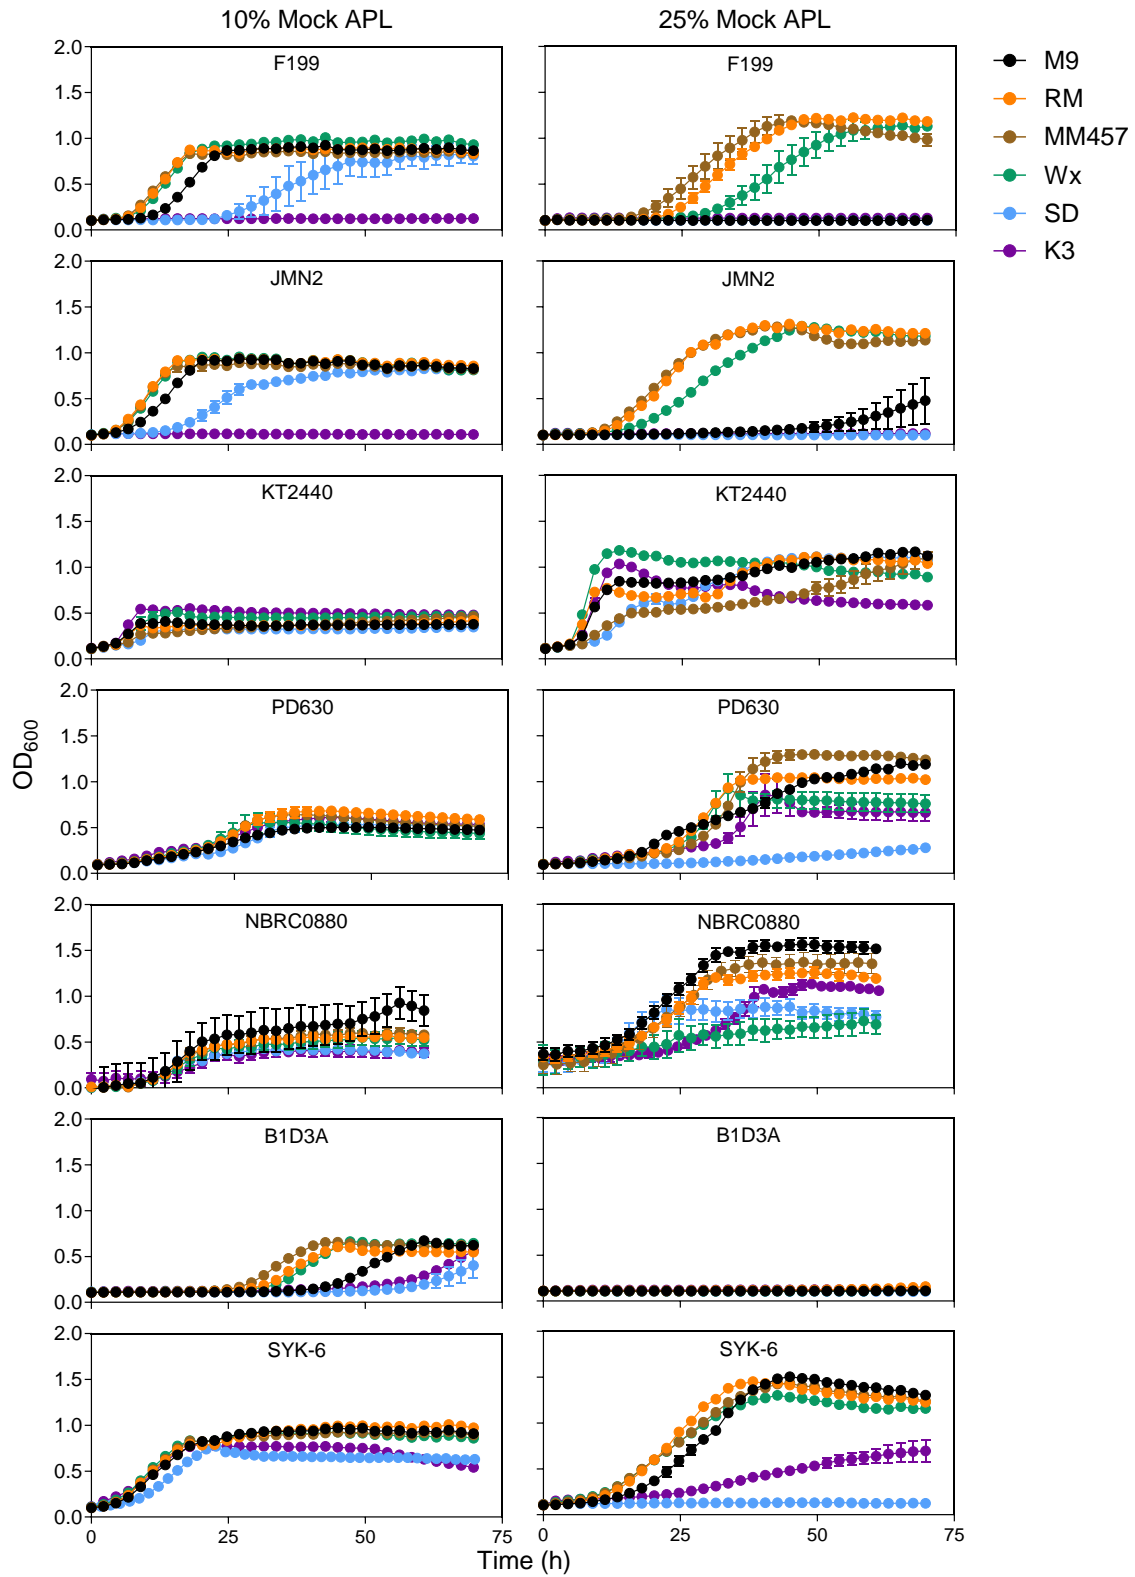

**Fig. S1.** Growth dynamics of all seven microbial strains grown on 10% or 25% mock APL and the six tested minimal media. Data represents the mean  $\pm$  the standard error of the mean of three biological replicates.

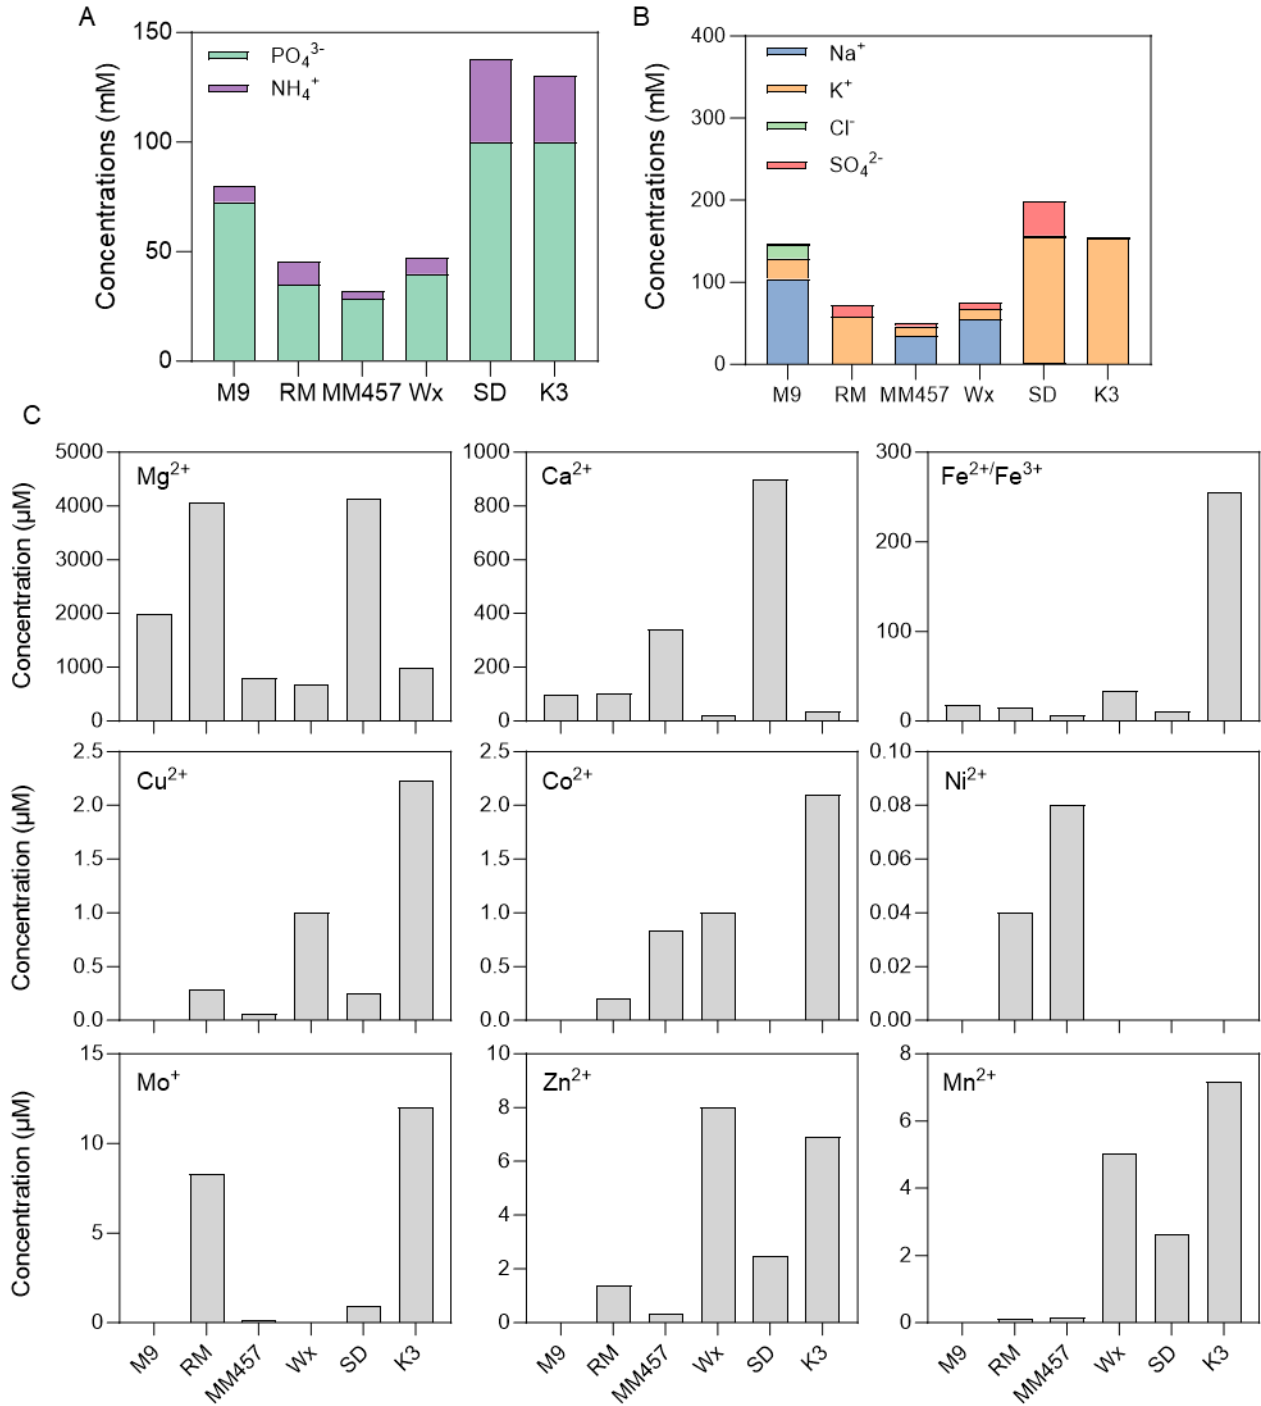

**Fig. S2.** Comparison of (A) essential nutrients, (B) cumulative salt additives, and (C) other trace metals in the six different media recipes.

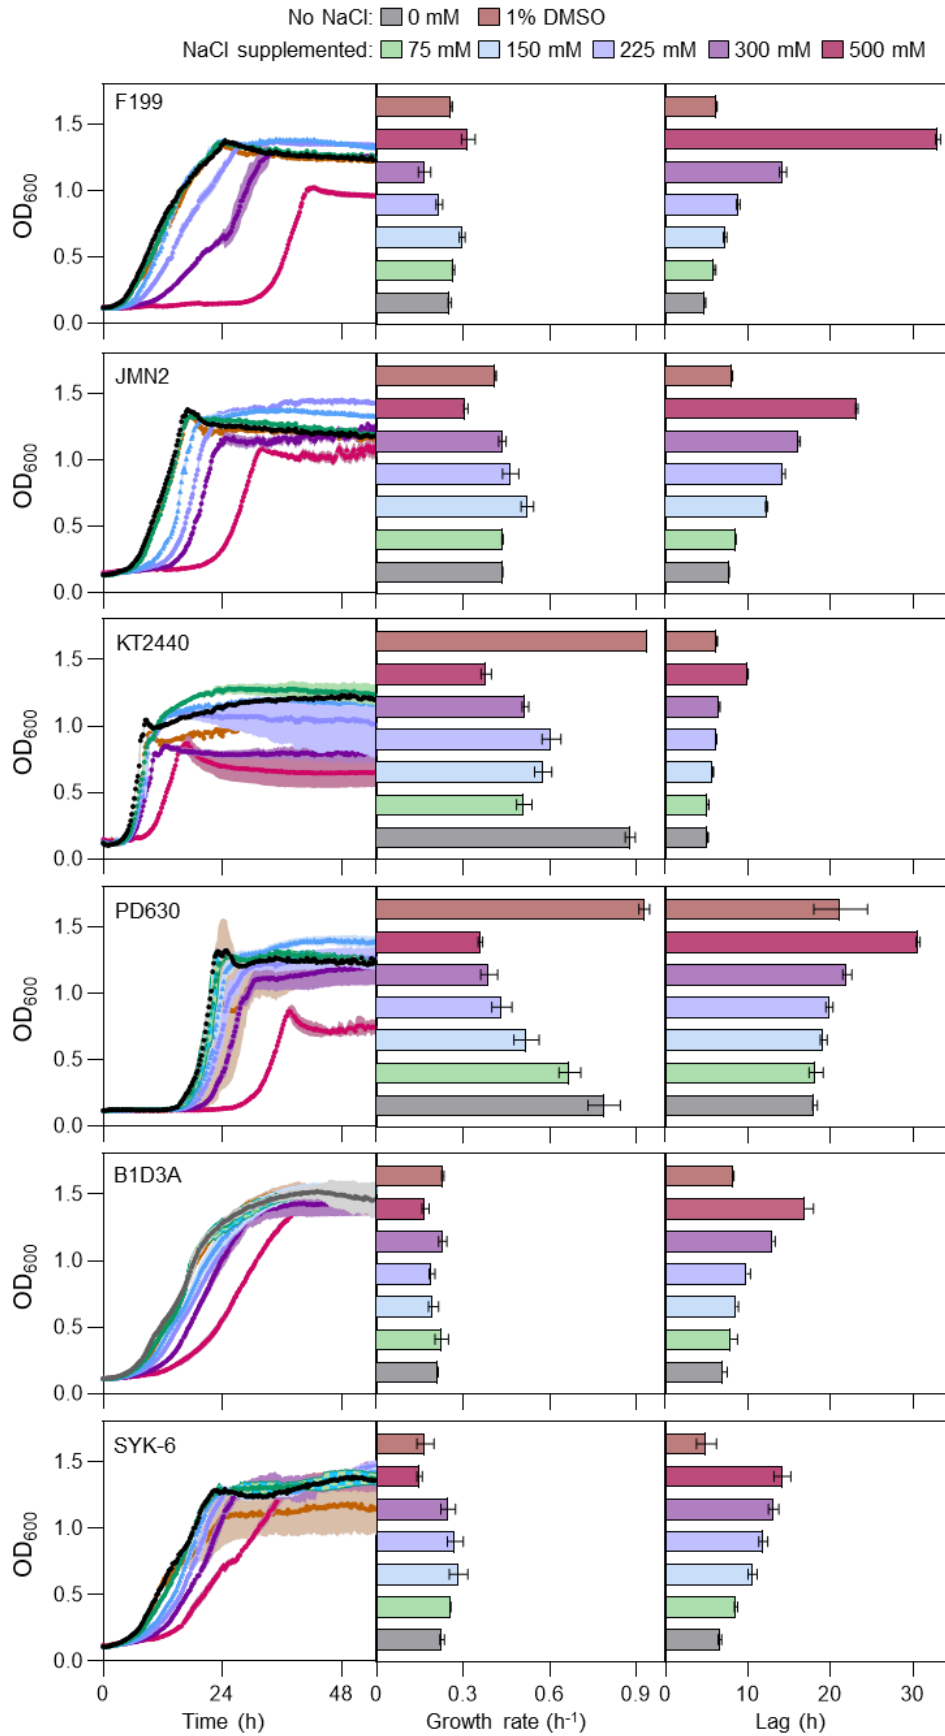

**Fig. S3.** Growth dynamics, maximum absolute growth rates (growth rate), and lag times for the six bacterial strains grown on favorable carbon sources: 20 mM glucose for F199, JMN2, KT2440, and PD630 or SEMP for SYK-6 and B1D3A. Addition of DMSO or NaCl was used to assess toxicity tolerance. Bacterial growth in 96-well plates containing 200  $\mu$ L of growth medium was monitored on a BioscreenC Pro instrument. The data are the means of the maximum absolute growth rate or lag time measurements determined from three replicates and error bars denote the standard deviation of the mean values.

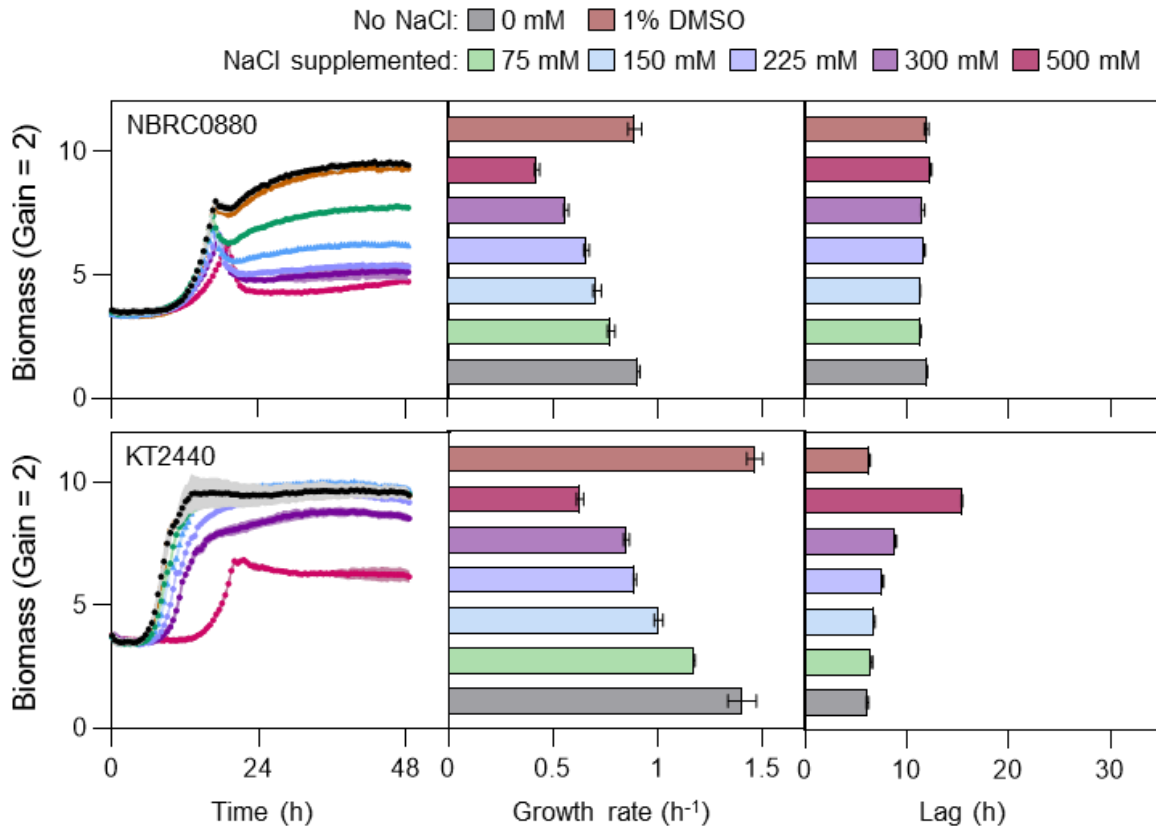

**Fig. S4.** Growth dynamics, maximum absolute growth rates (growth rate), and lag times for the NBRC0880 compared to KT2440 grown on 20 mM glucose plus increasing concentrations of NaCl or with 1% DMSO. Growth in 48-well plates containing 1 mL of growth medium was monitored using a BioLector® automated growth curve analysis system. The data are the means of the maximum absolute growth rate or lag time measurements determined from three replicates and error bars denote the standard deviation of the mean values.

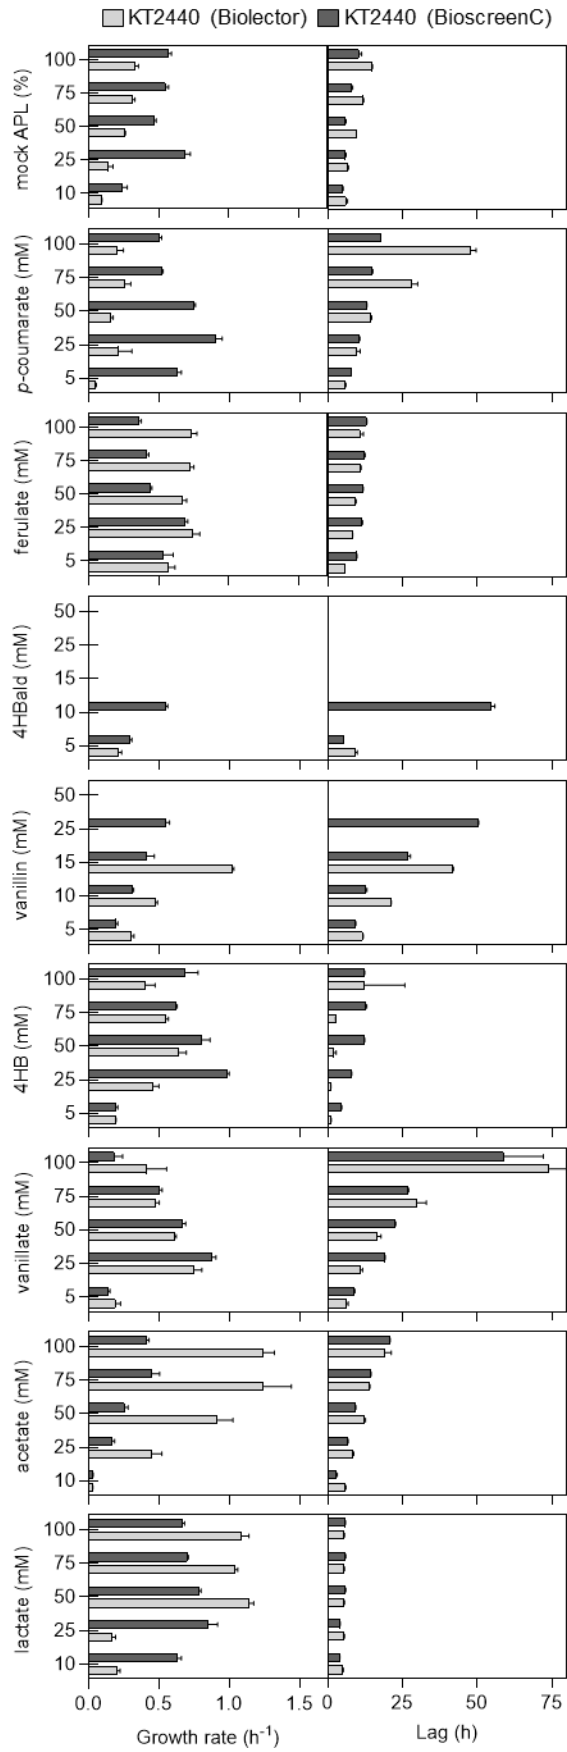

**Fig. S5.** Growth comparison of KT2440 in 1 mL culture volumes (light grey) compared to KT2440 in 0.2 mL culture volumes (dark grey). Maximum absolute growth rates and lags were calculated from the change in biomass over time monitored using BioLector® automated growth curve analysis system or a BioscreenC Pro instrument. RM minimal media supplemented with increasing concentrations of mock APL, aromatic acids, aldehydes, or aliphatic acids as sole carbon sources were used to culture strains. If no measurement of growth occurred after 80 h, the strains were considered to not grow on that substrate concentration. All data represent the mean  $\pm$  the standard deviation of the calculated growth rates and lags determined from three biological replicates.

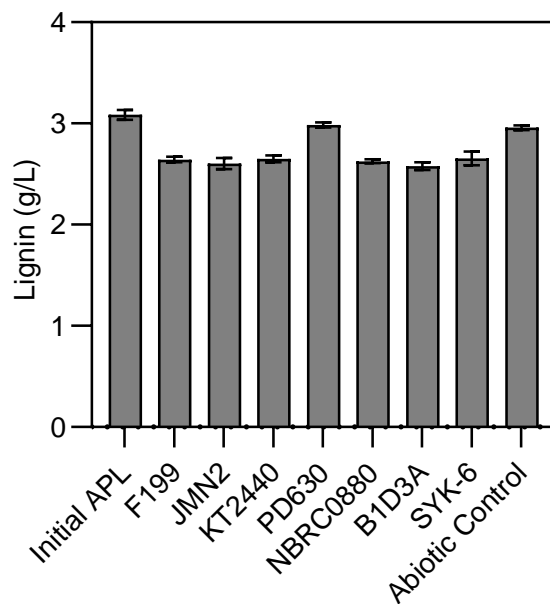

**Fig. S6.** The concentration of lignin (g/L) measured in the lyophilized supernatant of the initial APL versus the concentration after inoculation with the seven different microbial strains or no inoculation (abiotic control) after 120 h. The concentration was corrected for the amount of evaporation that occurred at the end of 120 h. Data represents the mean  $\pm$  the standard deviation of three replicates.

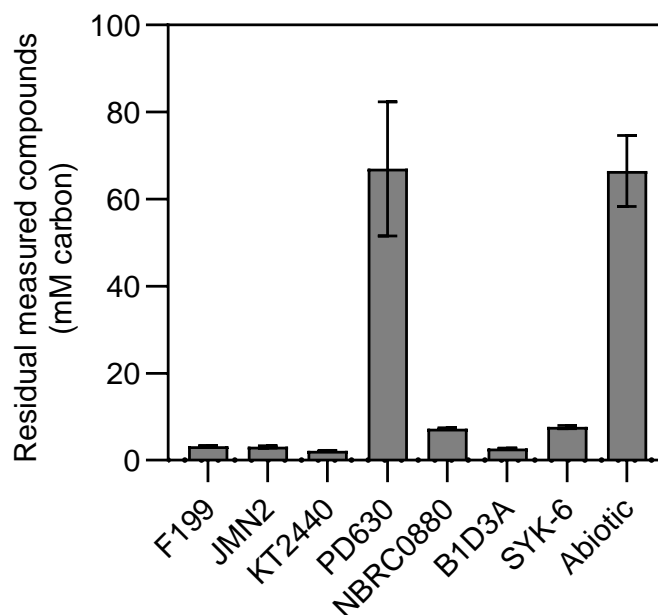

**Fig. S7.** The sum, in mM of carbon, of all measured aromatic and aliphatic acids present in the supernatant after 120 h. The concentration was corrected to account for the evaporation that occurred at the end of 120 h. Data represents the mean  $\pm$  the standard deviation of three replicates.

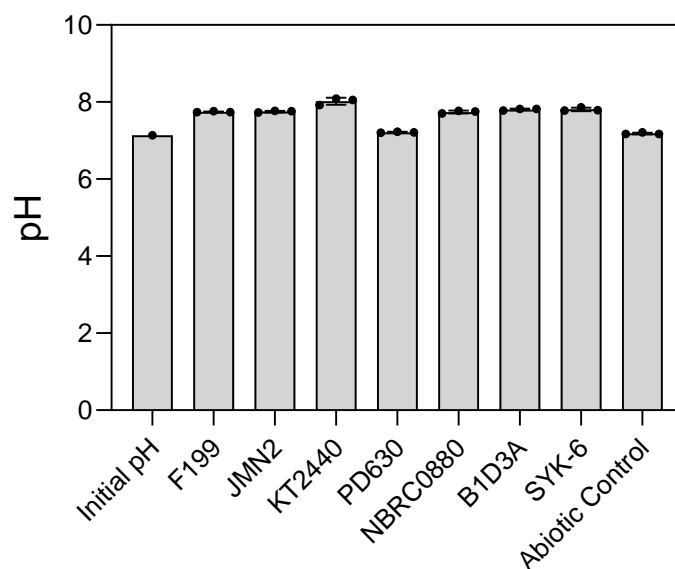

**Fig. S8.** Measured pH of APL media after 120 h of inoculation with the different microbial strains. Data represents the mean  $\pm$  the standard deviation of three biological replicates.



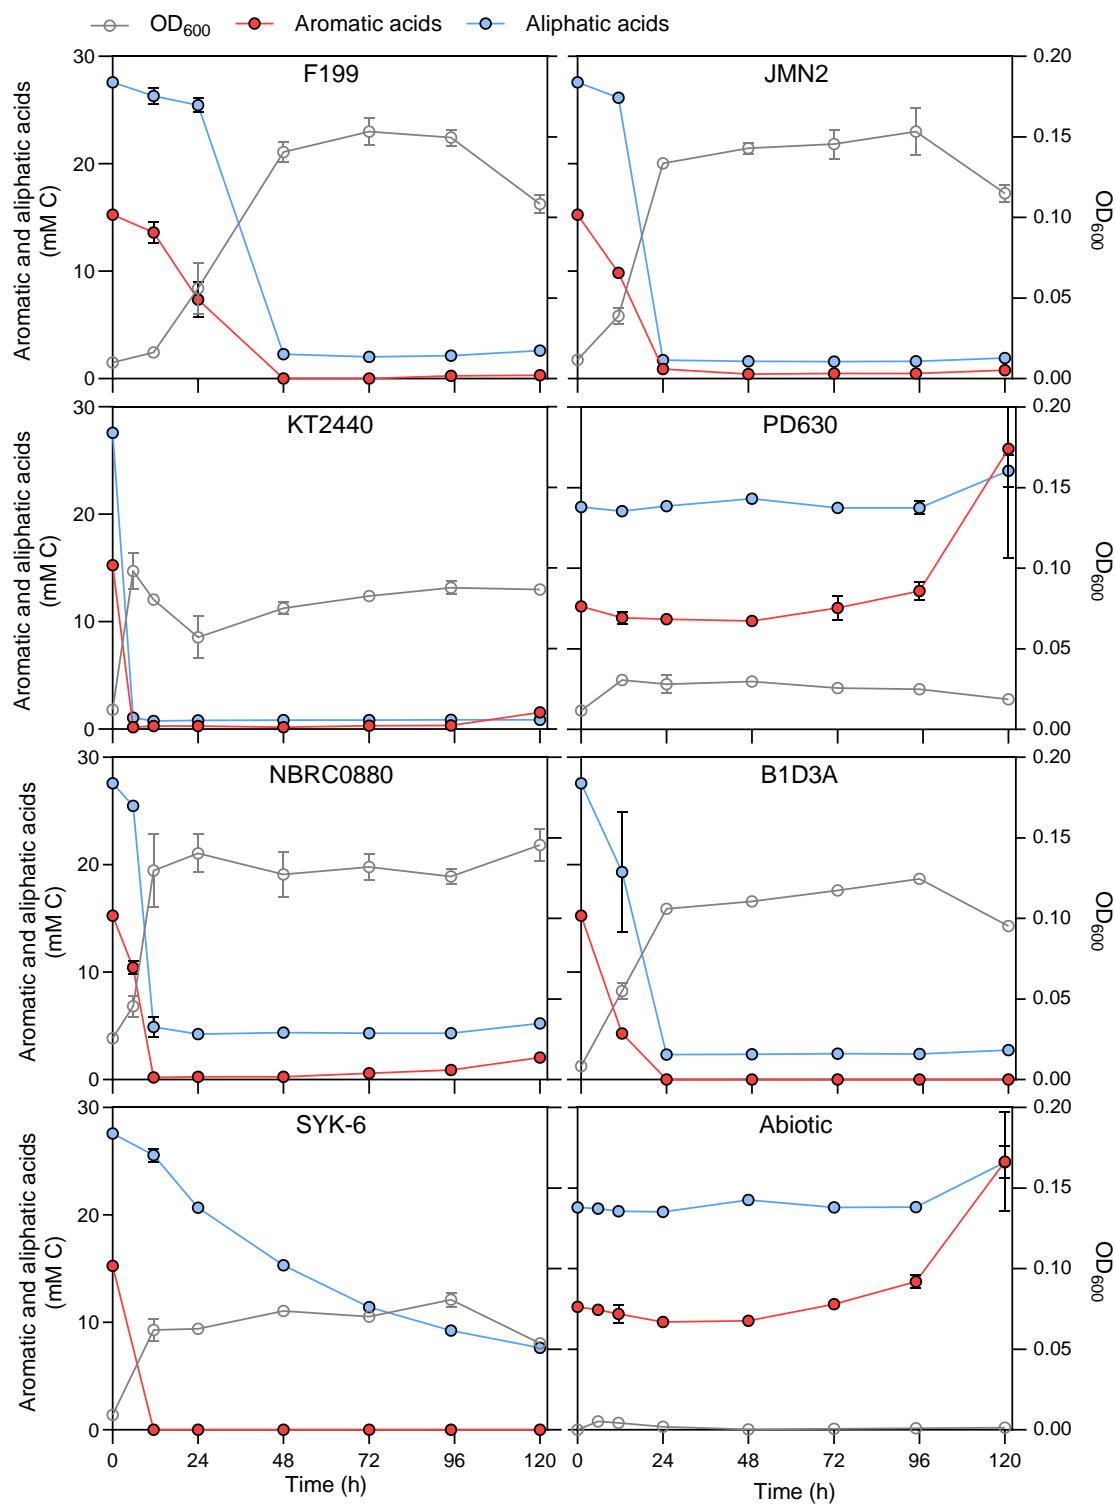

**Fig. S9.** Depletion profiles of the summed total of measured aromatic acids (red) and aliphatic acids (blue) over time for each strain. Data represents the mean  $\pm$  the standard deviation of three biological replicates.

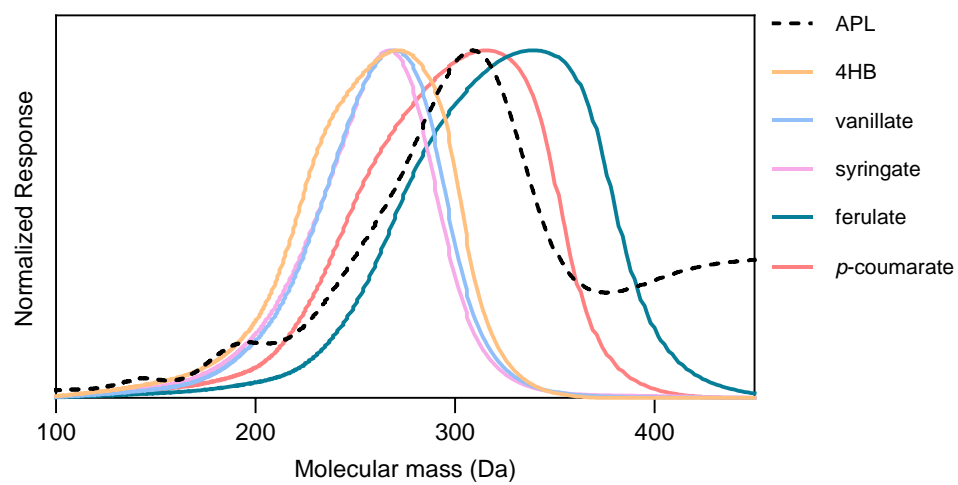

**Fig. S10.** Low molecular mass distribution of APL abiotic control compared to aromatic compound standards.

**Table S1.** Chemical components of all minimal media recipes

| Chemical Name                                             | Chemical Formula                                      | M9   | RM         | MM 457     | Wx    | SD    | K3        |
|-----------------------------------------------------------|-------------------------------------------------------|------|------------|------------|-------|-------|-----------|
| mM                                                        |                                                       |      |            |            |       |       |           |
| Sodium phosphate dibasic dodecahydrate                    | Na <sub>2</sub> HPO <sub>4</sub> · 12H <sub>2</sub> O | 47.8 | -          | 17.2       | 27.4  | -     | -         |
| Potassium phosphate monobasic                             | KH <sub>2</sub> PO <sub>4</sub>                       | 25.0 | 12.2       | 11.2       | 12.5  | 46.4  | 46.4      |
| Potassium phosphate dibasic                               | K <sub>2</sub> HPO <sub>4</sub>                       | -    | 22.8       | -          | -     | 53.6  | 53.6      |
| Sodium chloride                                           | NaCl                                                  | 8.56 | -          | -          | -     | 1.71  | -         |
| Ammonium chloride                                         | NH <sub>4</sub> Cl                                    | 7.57 | -          | -          | -     | -     | -         |
| Ammonium sulfate                                          | (NH <sub>4</sub> ) <sub>2</sub> SO <sub>4</sub>       | -    | 10.6       | 3.78       | 7.57  | 37.8  | -         |
| Ammonium phosphate dibasic                                | (NH <sub>4</sub> ) <sub>2</sub> HPO <sub>4</sub>      | -    | -          | -          | -     | -     | 30.3      |
| Magnesium sulfate heptahydrate                            | MgSO <sub>4</sub> · 7H <sub>2</sub> O                 | 2.00 | 4.06       | 0.81       | 0.406 | 4.15  | 1.00      |
| µM                                                        |                                                       |      |            |            |       |       |           |
| Magnesium oxide                                           | MgO                                                   | -    | -          | -          | 267   | -     | -         |
| Ferrous sulfate heptahydrate                              | FeSO <sub>4</sub> · 7H <sub>2</sub> O                 | 18.0 | 1.80       | 7.19       | 34.2  | 10.0  | 5.00      |
| Calcium chloride dihydrate                                | CaCl <sub>2</sub> · 2H <sub>2</sub> O                 | 100  | 102        | 340        | -     | 901   | 34.0      |
| Calcium carbonate                                         | CaCO <sub>3</sub>                                     | -    | -          | -          | 20.0  | -     | -         |
| Zinc sulfate heptahydrate                                 | ZnSO <sub>4</sub> · 7H <sub>2</sub> O                 | -    | 1.39       | 0.350      | 8.02  | 2.48  | -         |
| Zinc chloride                                             | ZnCl <sub>2</sub>                                     | -    | -          | -          | -     | -     | 6.90      |
| Manganese sulfate monohydrate                             | MnSO <sub>4</sub> · H <sub>2</sub> O                  | -    | 0.120      | -          | 5.02  | 2.65  | 7.17      |
| Manganese chloride tetrahydrate                           | MnCl <sub>2</sub> · 4H <sub>2</sub> O                 | -    | -          | 0.150      | -     | -     | -         |
| Copper sulfate pentahydrate                               | CuSO <sub>4</sub> · 5H <sub>2</sub> O                 | -    | -          | -          | 1.00  | 0.250 | -         |
| Copper chloride dihydrate                                 | CuCl <sub>2</sub> · 2H <sub>2</sub> O                 | -    | 0.290      | 0.060<br>0 | -     | -     | 2.23      |
| Cobalt sulfate heptahydrate                               | CoSO <sub>4</sub> · 7H <sub>2</sub> O                 | -    | 0.210      | -          | 1.00  | -     | -         |
| Cobalt chloride hexahydrate                               | CoCl <sub>2</sub> · 6H <sub>2</sub> O                 | -    | -          | 0.840      | -     | -     | 2.10      |
| Boric acid                                                | H <sub>3</sub> BO <sub>3</sub>                        | -    | 0.240      | 4.85       | 0.970 | 8.09  | 0.50<br>1 |
| Ethylenediaminetetraacetic acid (EDTA) disodium salt      | Na <sub>2</sub> EDTA                                  | -    | 0.860      | 17.1       | -     | -     | 1.19      |
| Ethylenediaminetetraacetic acid (EDTA) ferric-sodium salt | FeNa · EDTA                                           | -    | 13.6       | -          | -     | -     | -         |
| Nickel chloride hexahydrate                               | NiCl <sub>2</sub> · 6H <sub>2</sub> O                 | -    | 0.040<br>0 | 0.080<br>0 | -     | -     | -         |
| Sodium molybdate dihydrate                                | NaMoO <sub>2</sub> · 2H <sub>2</sub> O                | -    | 8.26       | 0.120      | -     | 0.970 | 12.0<br>0 |
| Ferric citrate                                            | C <sub>6</sub> H <sub>5</sub> FeO <sub>7</sub>        | -    | -          | -          | -     | -     | 250       |

|                             |                         |   |   |   |   |       |      |
|-----------------------------|-------------------------|---|---|---|---|-------|------|
| Thiamine HCl                | $C_{12}H_{18}Cl_2N_4OS$ | - | - | - | - | -     | 13.3 |
| Ferric chloride             | $FeCl_3$                | - | - | - | - | 1.23  | -    |
| Potassium iodide            | KI                      | - | - | - | - | 0.600 | -    |
|                             | nM                      |   |   |   |   |       |      |
| Biotin                      |                         | - | - | - | - | 8.19  | -    |
| Calcium pantothenate        |                         | - | - | - | - | 839.4 | -    |
| Folate                      |                         | - | - | - | - | 4.53  | -    |
| Inositol                    |                         | - | - | - | - | 11101 | -    |
| Niacin                      |                         | - | - | - | - | 3249  | -    |
| <i>p</i> -Aminobenzoic acid |                         | - | - | - | - | 1458  | -    |
| Pyridoxine HCl              |                         | - | - | - | - | 1945  | -    |
| Riboflavin                  |                         | - | - | - | - | 531   | -    |
| Thiamine HCl                |                         | - | - | - | - | 1185  | -    |

**Table S2.** Total ionic content of each minimal media recipe

|                                    | <b>M9</b> | <b>RM</b> | <b>MM457</b> | <b>Wx</b> | <b>SD</b> | <b>K3</b> |
|------------------------------------|-----------|-----------|--------------|-----------|-----------|-----------|
| <b>Essential nutrients (mM)</b>    |           |           |              |           |           |           |
| PO <sub>4</sub> <sup>3-</sup>      | 72.8      | 34.99     | 28.4         | 39.9      | 100       | 100       |
| NH <sub>4</sub> <sup>+</sup>       | 7.57      | 10.6      | 3.78         | 7.57      | 37.8      | 30.3      |
| Mg <sup>2+</sup>                   | 2.00      | 4.06      | 0.81         | 0.67      | 4.15      | 0.997     |
| Ca <sup>2+</sup>                   | 0.10      | 0.102     | 0.34         | 0.0199    | 0.901     | 0.0340    |
| <b>Supplemental salts (mM)</b>     |           |           |              |           |           |           |
| Na <sup>+</sup>                    | 104       | 0.0153    | 34.4         | 54.7      | 1.71      | 0.00238   |
| K <sup>+</sup>                     | 25.0      | 57.8      | 11.2         | 12.50     | 153       | 153       |
| Cl <sup>-</sup>                    | 16.3      | 0.205     | 0.682        | 0         | 1.71      | 0.0767    |
| SO <sub>4</sub> <sup>2-</sup>      | 2.02      | 14.7      | 4.60         | 8.03      | 42.0      | 1.00      |
| <b>Trace metal components (µM)</b> |           |           |              |           |           |           |
| Fe <sup>2+</sup> /Fe <sup>3+</sup> | 18        | 15.4      | 7.19         | 34.2      | 11.2      | 255       |
| Zn <sup>2+</sup>                   | 0         | 1.39      | 0.35         | 8.02      | 2.48      | 6.90      |
| Mn <sup>2+</sup>                   | 0         | 0.12      | 0.15         | 5.02      | 2.65      | 7.17      |
| Cu <sup>2+</sup>                   | 0         | 0.29      | 0.06         | 1         | 0.25      | 2.23      |
| Co <sup>2+</sup>                   | 0         | 0.21      | 0.84         | 1         | 0         | 2.10      |
| Ni <sup>2+</sup>                   | 0         | 0.04      | 0.08         | 0         | 0         | 0         |
| Mo <sup>+</sup>                    | -         | 8.26      | 0.12         | -         | 0.97      | 12.0      |

**Table S3.** APL compositional analysis.

| <b>Sample Description</b> | <b>Composition in freeze-dried APL (%)</b> |
|---------------------------|--------------------------------------------|
| Ash                       | 55.3 ± 0.2                                 |
| Lignin                    | 19.7 ± 0.2                                 |
| Glucan                    | 1.63 ± 0.03                                |
| Xylan                     | 6.16 ± 0.13                                |
| Galactan                  | 1.88 ± 0.2                                 |
| Arabinan                  | 2.88 ± 0.05                                |
| Fructan                   | 0.00 ± 0.00                                |
| Acetyl                    | 1.41 ± 0.06                                |
| Total %                   | 88.9 ± 0.3                                 |
