# Supplementary material for: Comparison of microbial strains as candidate hosts and genetic reservoirs for the valorization of lignin streams
Source: Royal Society of Chemistry journal article supplement (doi:10.1039/d4gc03876b), 2024-01-01
Supplement: d4gc03876b2.xlsx [file d4gc03876b2.xlsx]

## Sheet: Fig1_10%
P. putida KT2440																				R. opacus PD630																				S. lignivorans SYK-6
Time (h)	M9 10% Mock APL			RM 10% Mock APL			MM457 10% Mock APL			Wx 10% Mock APL			SD 10% Mock APL			K3 10% Mock APL				Time (h)	M9 10% Mock APL			RM 10% Mock APL			MM457 10% Mock APL			Wx 10% Mock APL			SD 10% Mock APL			K3 10% Mock APL				Time (h)	M9 10% Mock APL			RM 10% Mock APL			MM457 10% Mock APL
0	0.118	0.123	0.109	0.116	0.117	0.108	0.111	0.11	0.111	0.112	0.115	0.109	0.109	0.111	0.108	0.118	0.117	0.117		0	0.09	0.094	0.091	0.093	0.097	0.09	0.101	0.099	0.093	0.098	0.102	0.091	0.096	0.098	0.093	0.1	0.102	0.097		0	0.097	0.098	0.108	0.099	0.098	0.109	0.102	0.1	0.108
0.25	0.118	0.122	0.111	0.12	0.12	0.11	0.114	0.114	0.115	0.115	0.12	0.114	0.108	0.114	0.108	0.117	0.117	0.118		0.25	0.09	0.094	0.092	0.093	0.098	0.092	0.101	0.099	0.093	0.098	0.101	0.092	0.097	0.1	0.103	0.102	0.104	0.099		0.25	0.099	0.099	0.11	0.099	0.099	0.109	0.102	0.101	0.109
0.5	0.121	0.123	0.112	0.12	0.118	0.112	0.117	0.118	0.117	0.116	0.123	0.113	0.11	0.114	0.11	0.12	0.121	0.12		0.5	0.091	0.096	0.093	0.094	0.098	0.093	0.102	0.101	0.094	0.098	0.105	0.092	0.099	0.103	0.104	0.104	0.108	0.101		0.5	0.099	0.099	0.111	0.1	0.1	0.111	0.103	0.102	0.11
0.75	0.122	0.124	0.114	0.122	0.12	0.112	0.122	0.115	0.122	0.119	0.119	0.113	0.112	0.113	0.111	0.122	0.12	0.12		0.75	0.092	0.096	0.094	0.094	0.099	0.093	0.103	0.101	0.095	0.1	0.103	0.093	0.098	0.101	0.105	0.105	0.107	0.102		0.75	0.101	0.1	0.113	0.101	0.101	0.113	0.106	0.104	0.113
1	0.123	0.125	0.115	0.124	0.12	0.113	0.122	0.116	0.122	0.119	0.127	0.116	0.115	0.115	0.112	0.124	0.121	0.121		1	0.092	0.096	0.094	0.095	0.1	0.093	0.104	0.103	0.095	0.101	0.105	0.094	0.098	0.1	0.106	0.106	0.108	0.103		1	0.102	0.102	0.115	0.103	0.103	0.115	0.108	0.105	0.114
1.25	0.125	0.127	0.118	0.125	0.122	0.119	0.127	0.119	0.129	0.122	0.131	0.118	0.116	0.121	0.116	0.123	0.125	0.127		1.25	0.093	0.096	0.096	0.095	0.1	0.094	0.105	0.104	0.096	0.102	0.105	0.095	0.098	0.101	0.106	0.108	0.111	0.106		1.25	0.104	0.104	0.118	0.105	0.105	0.118	0.111	0.109	0.118
1.5	0.127	0.129	0.119	0.126	0.124	0.122	0.129	0.121	0.133	0.125	0.135	0.12	0.116	0.118	0.117	0.124	0.124	0.124		1.5	0.093	0.098	0.098	0.096	0.101	0.095	0.105	0.103	0.097	0.103	0.111	0.096	0.099	0.102	0.104	0.108	0.109	0.105		1.5	0.106	0.106	0.12	0.107	0.107	0.12	0.113	0.112	0.122
1.75	0.13	0.138	0.119	0.13	0.127	0.123	0.13	0.129	0.138	0.126	0.136	0.122	0.116	0.119	0.118	0.128	0.125	0.126		1.75	0.094	0.097	0.096	0.097	0.103	0.094	0.106	0.104	0.097	0.104	0.108	0.097	0.099	0.103	0.108	0.109	0.11	0.106		1.75	0.108	0.107	0.123	0.108	0.109	0.123	0.115	0.114	0.124
2	0.13	0.135	0.124	0.132	0.128	0.125	0.135	0.13	0.14	0.128	0.132	0.124	0.122	0.121	0.12	0.136	0.134	0.129		2	0.094	0.097	0.099	0.097	0.103	0.095	0.106	0.105	0.097	0.104	0.111	0.098	0.1	0.103	0.106	0.112	0.114	0.114		2	0.11	0.109	0.126	0.111	0.111	0.127	0.118	0.117	0.128
2.25	0.137	0.139	0.129	0.135	0.131	0.126	0.138	0.14	0.142	0.134	0.139	0.128	0.125	0.122	0.124	0.14	0.138	0.134		2.25	0.095	0.098	0.1	0.097	0.103	0.097	0.108	0.106	0.098	0.106	0.11	0.098	0.1	0.102	0.108	0.117	0.122	0.121		2.25	0.111	0.11	0.129	0.113	0.113	0.129	0.121	0.119	0.132
2.5	0.144	0.143	0.132	0.138	0.133	0.128	0.141	0.137	0.146	0.136	0.141	0.129	0.128	0.123	0.122	0.147	0.147	0.144		2.5	0.096	0.098	0.099	0.098	0.104	0.096	0.109	0.109	0.099	0.107	0.116	0.1	0.1	0.102	0.11	0.122	0.126	0.119		2.5	0.113	0.112	0.132	0.116	0.115	0.133	0.124	0.124	0.135
2.75	0.145	0.15	0.135	0.144	0.137	0.129	0.134	0.135	0.148	0.137	0.136	0.132	0.128	0.13	0.124	0.153	0.146	0.143		2.75	0.096	0.102	0.098	0.098	0.105	0.098	0.109	0.107	0.099	0.107	0.111	0.1	0.101	0.103	0.109	0.123	0.126	0.121		2.75	0.116	0.115	0.136	0.119	0.118	0.138	0.127	0.127	0.14
3	0.145	0.154	0.136	0.144	0.138	0.133	0.143	0.139	0.149	0.139	0.144	0.134	0.13	0.133	0.129	0.158	0.152	0.147		3	0.096	0.1	0.102	0.099	0.104	0.097	0.11	0.108	0.1	0.108	0.113	0.101	0.1	0.103	0.11	0.123	0.124	0.124		3	0.118	0.118	0.14	0.122	0.122	0.143	0.13	0.13	0.145
3.25	0.148	0.158	0.14	0.147	0.141	0.136	0.147	0.144	0.148	0.143	0.146	0.136	0.132	0.131	0.134	0.161	0.156	0.15		3.25	0.096	0.099	0.1	0.099	0.106	0.098	0.11	0.108	0.1	0.109	0.113	0.101	0.101	0.104	0.107	0.126	0.131	0.127		3.25	0.121	0.12	0.144	0.126	0.125	0.147	0.134	0.134	0.149
3.5	0.156	0.163	0.143	0.151	0.145	0.142	0.15	0.139	0.149	0.145	0.15	0.14	0.134	0.139	0.138	0.164	0.16	0.152		3.5	0.097	0.101	0.102	0.1	0.107	0.098	0.111	0.11	0.102	0.109	0.115	0.102	0.102	0.105	0.11	0.13	0.132	0.132		3.5	0.124	0.123	0.149	0.129	0.128	0.152	0.138	0.137	0.153
3.75	0.159	0.168	0.146	0.154	0.148	0.147	0.147	0.15	0.155	0.147	0.153	0.142	0.136	0.143	0.139	0.166	0.162	0.156		3.75	0.098	0.101	0.106	0.101	0.108	0.1	0.112	0.115	0.102	0.11	0.119	0.103	0.103	0.107	0.111	0.131	0.131	0.131		3.75	0.127	0.126	0.154	0.133	0.132	0.158	0.142	0.141	0.159
4	0.163	0.173	0.149	0.155	0.148	0.146	0.156	0.142	0.155	0.149	0.155	0.143	0.138	0.147	0.145	0.167	0.164	0.157		4	0.099	0.102	0.11	0.101	0.108	0.1	0.114	0.111	0.103	0.112	0.116	0.103	0.104	0.107	0.106	0.137	0.138	0.137		4	0.13	0.13	0.16	0.138	0.136	0.165	0.147	0.145	0.165
4.25	0.169	0.176	0.157	0.16	0.153	0.151	0.149	0.146	0.155	0.151	0.159	0.146	0.141	0.148	0.15	0.172	0.167	0.16		4.25	0.099	0.102	0.105	0.103	0.111	0.101	0.115	0.112	0.103	0.113	0.118	0.104	0.103	0.106	0.111	0.135	0.134	0.139		4.25	0.135	0.134	0.167	0.143	0.142	0.172	0.152	0.15	0.172
4.5	0.171	0.18	0.161	0.161	0.155	0.154	0.155	0.148	0.155	0.153	0.169	0.151	0.143	0.152	0.152	0.185	0.171	0.161		4.5	0.1	0.103	0.107	0.104	0.111	0.102	0.117	0.114	0.105	0.116	0.123	0.105	0.104	0.108	0.109	0.137	0.135	0.139		4.5	0.139	0.138	0.173	0.147	0.146	0.179	0.157	0.155	0.179
4.75	0.175	0.186	0.165	0.166	0.157	0.159	0.154	0.161	0.157	0.154	0.183	0.162	0.142	0.156	0.154	0.207	0.172	0.165		4.75	0.101	0.104	0.11	0.105	0.113	0.103	0.118	0.116	0.106	0.116	0.125	0.106	0.105	0.109	0.1	0.145	0.153	0.144		4.75	0.142	0.142	0.18	0.153	0.152	0.186	0.163	0.16	0.186
5	0.184	0.195	0.17	0.173	0.161	0.167	0.154	0.163	0.16	0.156	0.2	0.174	0.146	0.16	0.158	0.228	0.175	0.183		5	0.102	0.106	0.109	0.106	0.114	0.105	0.12	0.12	0.107	0.117	0.125	0.107	0.106	0.109	0.113	0.145	0.149	0.143		5	0.146	0.147	0.187	0.159	0.157	0.195	0.169	0.166	0.194
5.25	0.194	0.206	0.177	0.181	0.169	0.175	0.164	0.167	0.16	0.158	0.22	0.189	0.147	0.162	0.161	0.247	0.188	0.206		5.25	0.103	0.106	0.115	0.108	0.116	0.106	0.123	0.121	0.108	0.119	0.127	0.108	0.106	0.113	0.11	0.147	0.156	0.148		5.25	0.152	0.152	0.196	0.166	0.164	0.204	0.176	0.172	0.203
5.5	0.205	0.218	0.186	0.193	0.176	0.187	0.163	0.17	0.158	0.16	0.241	0.207	0.149	0.163	0.165	0.277	0.211	0.223		5.5	0.104	0.108	0.121	0.11	0.12	0.109	0.123	0.127	0.111	0.121	0.131	0.11	0.107	0.114	0.105	0.15	0.151	0.152		5.5	0.158	0.158	0.205	0.173	0.171	0.214	0.183	0.179	0.212
5.75	0.219	0.233	0.195	0.205	0.185	0.202	0.164	0.171	0.16	0.163	0.269	0.226	0.149	0.167	0.165	0.303	0.232	0.248		5.75	0.105	0.108	0.115	0.111	0.121	0.109	0.127	0.123	0.111	0.124	0.134	0.111	0.109	0.115	0.112	0.149	0.152	0.152		5.75	0.163	0.164	0.215	0.18	0.178	0.225	0.192	0.187	0.223
6	0.236	0.25	0.209	0.219	0.197	0.221	0.167	0.177	0.161	0.163	0.294	0.245	0.15	0.168	0.167	0.335	0.252	0.277		6	0.107	0.11	0.115	0.114	0.124	0.111	0.129	0.125	0.112	0.127	0.14	0.112	0.109	0.121	0.117	0.153	0.158	0.155		6	0.17	0.17	0.225	0.188	0.186	0.237	0.2	0.194	0.234
6.25	0.252	0.263	0.222	0.236	0.21	0.241	0.171	0.183	0.164	0.165	0.312	0.26	0.151	0.17	0.167	0.366	0.272	0.305		6.25	0.108	0.112	0.12	0.115	0.125	0.113	0.131	0.127	0.114	0.127	0.136	0.114	0.11	0.115	0.113	0.15	0.149	0.154		6.25	0.176	0.178	0.237	0.197	0.195	0.247	0.209	0.203	0.246
6.5	0.266	0.276	0.236	0.253	0.228	0.263	0.175	0.188	0.167	0.168	0.331	0.278	0.15	0.169	0.167	0.397	0.3	0.336		6.5	0.11	0.113	0.123	0.117	0.132	0.115	0.133	0.132	0.115	0.131	0.141	0.115	0.113	0.117	0.116	0.163	0.169	0.157		6.5	0.184	0.186	0.249	0.207	0.204	0.26	0.219	0.212	0.259
6.75	0.278	0.291	0.249	0.27	0.244	0.283	0.18	0.196	0.17	0.173	0.327	0.293	0.151	0.169	0.167	0.426	0.331	0.367		6.75	0.111	0.116	0.123	0.12	0.131	0.117	0.136	0.132	0.118	0.133	0.141	0.117	0.112	0.119	0.115	0.156	0.16	0.159		6.75	0.19	0.193	0.26	0.216	0.214	0.275	0.229	0.221	0.271
7	0.294	0.306	0.263	0.289	0.262	0.308	0.186	0.206	0.174	0.179	0.339	0.308	0.154	0.17	0.169	0.448	0.358	0.398		7	0.113	0.117	0.125	0.122	0.134	0.123	0.137	0.134	0.119	0.137	0.147	0.119	0.114	0.122	0.116	0.157	0.169	0.154		7	0.2	0.203	0.275	0.228	0.225	0.289	0.241	0.232	0.286
7.25	0.311	0.319	0.279	0.308	0.282	0.331	0.195	0.219	0.179	0.186	0.358	0.325	0.157	0.172	0.172	0.464	0.387	0.418		7.25	0.115	0.12	0.139	0.123	0.142	0.121	0.139	0.143	0.121	0.14	0.146	0.12	0.116	0.122	0.12	0.167	0.183	0.157		7.25	0.207	0.212	0.287	0.239	0.236	0.306	0.252	0.243	0.301
7.5	0.325	0.332	0.294	0.325	0.303	0.35	0.205	0.231	0.185	0.193	0.392	0.373	0.16	0.175	0.175	0.482	0.41	0.439		7.5	0.116	0.122	0.131	0.126	0.14	0.123	0.141	0.14	0.123	0.14	0.148	0.122	0.117	0.131	0.123	0.168	0.176	0.157		7.5	0.217	0.223	0.305	0.252	0.248	0.324	0.266	0.256	0.31
7.75	0.339	0.347	0.309	0.339	0.319	0.367	0.215	0.244	0.194	0.202	0.407	0.38	0.165	0.179	0.18	0.499	0.43	0.461		7.75	0.118	0.125	0.136	0.13	0.141	0.128	0.147	0.145	0.124	0.142	0.154	0.125	0.118	0.134	0.124	0.173	0.186	0.168		7.75	0.228	0.233	0.32	0.266	0.262	0.342	0.28	0.269	0.329
8	0.355	0.363	0.322	0.351	0.333	0.381	0.225	0.256	0.202	0.209	0.436	0.406	0.172	0.183	0.185	0.522	0.452	0.485		8	0.12	0.127	0.135	0.131	0.146	0.131	0.147	0.145	0.127	0.147	0.161	0.127	0.121	0.135	0.126	0.167	0.18	0.167		8	0.239	0.246	0.335	0.282	0.277	0.358	0.296	0.284	0.346
8.25	0.37	0.374	0.336	0.358	0.347	0.39	0.237	0.27	0.21	0.218	0.435	0.414	0.18	0.188	0.191	0.536	0.477	0.505		8.25	0.122	0.125	0.139	0.134	0.147	0.139	0.148	0.149	0.129	0.147	0.163	0.129	0.125	0.138	0.125	0.181	0.185	0.17		8.25	0.254	0.262	0.349	0.297	0.292	0.374	0.311	0.298	0.364
8.5	0.385	0.384	0.352	0.363	0.357	0.393	0.249	0.285	0.22	0.228	0.438	0.408	0.188	0.194	0.198	0.543	0.488	0.513		8.5	0.124	0.127	0.144	0.135	0.154	0.134	0.149	0.151	0.132	0.149	0.163	0.132	0.122	0.132	0.127	0.18	0.171	0.168		8.5	0.265	0.275	0.363	0.313	0.308	0.391	0.327	0.313	0.379
8.75	0.39	0.388	0.358	0.355	0.354	0.382	0.259	0.292	0.228	0.232	0.477	0.446	0.187	0.196	0.201	0.541	0.523	0.543		8.75	0.127	0.132	0.15	0.14	0.155	0.139	0.158	0.159	0.134	0.157	0.168	0.135	0.124	0.135	0.13	0.187	0.207	0.17		8.75	0.278	0.287	0.379	0.329	0.324	0.408	0.342	0.328	0.397
9	0.399	0.394	0.369	0.354	0.357	0.381	0.267	0.298	0.237	0.24	0.473	0.45	0.192	0.203	0.21	0.541	0.541	0.551		9	0.13	0.137	0.151	0.145	0.159	0.144	0.159	0.166	0.136	0.164	0.171	0.138	0.128	0.138	0.132	0.186	0.209	0.177		9	0.291	0.304	0.394	0.346	0.343	0.427	0.359	0.344	0.418
9.25	0.402	0.395	0.377	0.351	0.355	0.377	0.27	0.301	0.242	0.25	0.459	0.442	0.198	0.211	0.222	0.544	0.545	0.552		9.25	0.132	0.135	0.147	0.147	0.161	0.147	0.163	0.167	0.14	0.164	0.173	0.138	0.129	0.14	0.132	0.194	0.198	0.169		9.25	0.307	0.318	0.407	0.365	0.358	0.442	0.376	0.361	0.433
9.5	0.405	0.397	0.382	0.347	0.353	0.374	0.273	0.304	0.246	0.259	0.473	0.453	0.206	0.223	0.235	0.542	0.562	0.558		9.5	0.134	0.137	0.152	0.148	0.162	0.148	0.167	0.167	0.144	0.168	0.176	0.141	0.131	0.135	0.133	0.188	0.205	0.17		9.5	0.322	0.335	0.424	0.381	0.375	0.459	0.393	0.377	0.452
9.75	0.408	0.398	0.387	0.346	0.351	0.371	0.276	0.304	0.248	0.271	0.478	0.457	0.217	0.238	0.243	0.54	0.561	0.549		9.75	0.136	0.144	0.158	0.149	0.165	0.148	0.165	0.166	0.154	0.17	0.183	0.141	0.132	0.141	0.138	0.202	0.225	0.187		9.75	0.342	0.35	0.441	0.396	0.393	0.477	0.413	0.395	0.469
10	0.409	0.397	0.389	0.344	0.348	0.368	0.277	0.305	0.25	0.283	0.481	0.462	0.225	0.252	0.251	0.539	0.554	0.548		10	0.137	0.145	0.158	0.154	0.168	0.155	0.169	0.174	0.149	0.175	0.186	0.144	0.139	0.144	0.14	0.197	0.218	0.178		10	0.358	0.367	0.452	0.41	0.408	0.491	0.427	0.413	0.486
10.25	0.409	0.397	0.39	0.342	0.346	0.366	0.278	0.307	0.251	0.293	0.491	0.469	0.233	0.262	0.264	0.538	0.547	0.543		10.25	0.139	0.152	0.165	0.153	0.175	0.157	0.172	0.173	0.149	0.177	0.184	0.15	0.137	0.155	0.138	0.205	0.22	0.178		10.25	0.375	0.38	0.465	0.425	0.425	0.502	0.444	0.428	0.499
10.5	0.403	0.392	0.386	0.338	0.341	0.362	0.28	0.306	0.251	0.306	0.509	0.49	0.24	0.273	0.278	0.537	0.545	0.54		10.5	0.141	0.15	0.159	0.159	0.179	0.154	0.17	0.176	0.153	0.182	0.186	0.15	0.136	0.146	0.142	0.211	0.214	0.179		10.5	0.384	0.393	0.48	0.438	0.438	0.511	0.459	0.444	0.51
10.75	0.401	0.39	0.385	0.333	0.337	0.357	0.28	0.307	0.252	0.311	0.503	0.492	0.245	0.287	0.294	0.538	0.548	0.542		10.75	0.145	0.15	0.163	0.159	0.172	0.166	0.177	0.175	0.152	0.187	0.189	0.157	0.137	0.147	0.146	0.205	0.228	0.189		10.75	0.402	0.407	0.493	0.452	0.452	0.527	0.473	0.459	0.525
11	0.398	0.388	0.383	0.331	0.335	0.354	0.281	0.308	0.254	0.321	0.505	0.504	0.249	0.303	0.307	0.533	0.545	0.535		11	0.146	0.148	0.166	0.161	0.174	0.155	0.178	0.181	0.155	0.19	0.187	0.153	0.141	0.145	0.139	0.213	0.221	0.185		11	0.41	0.426	0.505	0.464	0.466	0.536	0.488	0.476	0.536
11.25	0.394	0.385	0.38	0.328	0.332	0.351	0.281	0.305	0.253	0.331	0.511	0.51	0.25	0.321	0.318	0.533	0.545	0.535		11.25	0.147	0.156	0.171	0.167	0.18	0.172	0.178	0.18	0.157	0.188	0.2	0.159	0.142	0.151	0.147	0.228	0.248	0.214		11.25	0.426	0.44	0.519	0.478	0.482	0.55	0.501	0.495	0.551
11.5	0.393	0.387	0.378	0.326	0.329	0.349	0.282	0.305	0.254	0.34	0.524	0.507	0.25	0.332	0.327	0.529	0.542	0.529		11.5	0.151	0.161	0.174	0.167	0.181	0.17	0.18	0.182	0.155	0.191	0.196	0.161	0.143	0.15	0.151	0.217	0.226	0.187		11.5	0.434	0.448	0.533	0.491	0.498	0.564	0.516	0.512	0.566
11.75	0.393	0.395	0.379	0.325	0.328	0.348	0.284	0.308	0.255	0.353	0.48	0.485	0.252	0.346	0.335	0.528	0.541	0.527		11.75	0.152	0.161	0.178	0.169	0.185	0.165	0.182	0.182	0.165	0.195	0.201	0.165	0.146	0.155	0.148	0.225	0.234	0.198		11.75	0.444	0.459	0.544	0.505	0.51	0.577	0.529	0.524	0.578
12	0.393	0.406	0.376	0.324	0.326	0.347	0.282	0.307	0.255	0.364	0.475	0.488	0.25	0.356	0.339	0.527	0.54	0.527		12	0.154	0.161	0.174	0.17	0.184	0.171	0.184	0.184	0.161	0.197	0.205	0.167	0.147	0.153	0.149	0.225	0.25	0.2		12	0.456	0.474	0.558	0.519	0.526	0.591	0.546	0.542	0.593
12.25	0.4	0.421	0.378	0.326	0.326	0.349	0.283	0.307	0.256	0.377	0.503	0.512	0.25	0.364	0.344	0.525	0.536	0.524		12.25	0.158	0.165	0.175	0.175	0.183	0.177	0.19	0.187	0.167	0.201	0.207	0.174	0.152	0.157	0.164	0.232	0.249	0.218		12.25	0.469	0.493	0.569	0.528	0.536	0.609	0.555	0.553	0.607
12.5	0.412	0.422	0.385	0.328	0.328	0.351	0.284	0.308	0.256	0.391	0.492	0.509	0.25	0.371	0.347	0.524	0.535	0.522		12.5	0.158	0.162	0.182	0.177	0.189	0.178	0.189	0.189	0.168	0.201	0.211	0.172	0.156	0.159	0.165	0.234	0.254	0.213		12.5	0.482	0.498	0.582	0.54	0.55	0.62	0.568	0.564	0.616
12.75	0.422	0.417	0.392	0.33	0.33	0.353	0.283	0.306	0.256	0.403	0.494	0.52	0.247	0.373	0.344	0.52	0.53	0.517		12.75	0.161	0.17	0.183	0.175	0.193	0.183	0.191	0.189	0.17	0.208	0.216	0.179	0.157	0.165	0.168	0.235	0.254	0.223		12.75	0.492	0.516	0.592	0.557	0.562	0.63	0.579	0.577	0.63
13	0.427	0.418	0.408	0.336	0.334	0.358	0.284	0.308	0.257	0.418	0.516	0.534	0.248	0.376	0.345	0.52	0.529	0.517		13	0.161	0.169	0.185	0.184	0.194	0.19	0.192	0.191	0.172	0.209	0.218	0.19	0.162	0.172	0.169	0.24	0.259	0.225		13	0.507	0.519	0.605	0.565	0.572	0.647	0.589	0.589	0.639
13.25	0.421	0.412	0.409	0.336	0.338	0.362	0.284	0.31	0.258	0.429	0.518	0.539	0.244	0.373	0.341	0.521	0.527	0.512		13.25	0.169	0.172	0.18	0.184	0.192	0.185	0.194	0.192	0.168	0.218	0.225	0.182	0.155	0.164	0.158	0.253	0.248	0.209		13.25	0.517	0.538	0.62	0.574	0.587	0.654	0.606	0.601	0.652
13.5	0.417	0.407	0.403	0.336	0.341	0.363	0.283	0.306	0.257	0.437	0.502	0.541	0.242	0.367	0.334	0.521	0.529	0.516		13.5	0.171	0.178	0.197	0.188	0.203	0.198	0.199	0.199	0.183	0.223	0.229	0.197	0.155	0.177	0.173	0.248	0.249	0.228		13.5	0.526	0.544	0.631	0.59	0.598	0.666	0.617	0.612	0.669
13.75	0.416	0.407	0.402	0.335	0.343	0.363	0.283	0.306	0.257	0.444	0.535	0.568	0.241	0.366	0.332	0.518	0.526	0.512		13.75	0.181	0.176	0.188	0.187	0.201	0.197	0.197	0.2	0.177	0.227	0.232	0.189	0.158	0.178	0.163	0.261	0.254	0.239		13.75	0.536	0.556	0.636	0.603	0.613	0.678	0.629	0.631	0.682
14	0.412	0.402	0.398	0.332	0.341	0.36	0.282	0.306	0.256	0.45	0.545	0.581	0.24	0.362	0.329	0.518	0.526	0.511		14	0.176	0.18	0.189	0.192	0.203	0.202	0.203	0.2	0.182	0.231	0.242	0.2	0.162	0.176	0.167	0.267	0.254	0.249		14	0.554	0.569	0.652	0.612	0.63	0.691	0.641	0.638	0.693
14.25	0.412	0.403	0.398	0.335	0.34	0.362	0.283	0.308	0.257	0.455	0.531	0.562	0.243	0.36	0.327	0.518	0.524	0.509		14.25	0.177	0.183	0.192	0.193	0.203	0.197	0.204	0.203	0.179	0.235	0.242	0.195	0.161	0.176	0.169	0.261	0.259	0.247		14.25	0.566	0.59	0.666	0.627	0.644	0.705	0.655	0.653	0.708
14.5	0.411	0.402	0.397	0.336	0.342	0.364	0.284	0.31	0.259	0.456	0.541	0.563	0.249	0.358	0.325	0.52	0.524	0.507		14.5	0.184	0.186	0.195	0.198	0.208	0.204	0.208	0.213	0.185	0.24	0.255	0.207	0.164	0.185	0.173	0.268	0.268	0.247		14.5	0.576	0.602	0.68	0.643	0.65	0.716	0.662	0.658	0.718
14.75	0.406	0.398	0.393	0.338	0.343	0.366	0.287	0.314	0.26	0.457	0.559	0.565	0.26	0.353	0.321	0.52	0.523	0.507		14.75	0.182	0.188	0.203	0.198	0.213	0.207	0.214	0.213	0.182	0.245	0.243	0.204	0.167	0.185	0.172	0.273	0.268	0.238		14.75	0.59	0.608	0.69	0.659	0.664	0.728	0.678	0.674	0.732
15	0.407	0.399	0.393	0.34	0.346	0.369	0.29	0.318	0.263	0.46	0.55	0.566	0.265	0.353	0.321	0.526	0.523	0.511		15	0.187	0.193	0.206	0.202	0.218	0.209	0.215	0.215	0.191	0.251	0.238	0.212	0.165	0.185	0.178	0.274	0.261	0.239		15	0.602	0.626	0.702	0.668	0.676	0.747	0.696	0.687	0.757
15.25	0.406	0.398	0.392	0.343	0.348	0.371	0.292	0.321	0.265	0.46	0.564	0.573	0.264	0.351	0.321	0.531	0.524	0.513		15.25	0.191	0.196	0.206	0.205	0.224	0.214	0.217	0.219	0.191	0.257	0.235	0.21	0.169	0.192	0.187	0.279	0.264	0.241		15.25	0.606	0.632	0.71	0.677	0.686	0.754	0.702	0.694	0.76
15.5	0.406	0.398	0.392	0.345	0.351	0.373	0.294	0.321	0.267	0.462	0.561	0.562	0.264	0.35	0.321	0.534	0.526	0.513		15.5	0.198	0.202	0.212	0.209	0.231	0.219	0.226	0.225	0.189	0.261	0.233	0.211	0.174	0.199	0.182	0.279	0.261	0.243		15.5	0.622	0.642	0.723	0.688	0.697	0.767	0.71	0.706	0.774
15.75	0.403	0.395	0.389	0.346	0.352	0.375	0.296	0.32	0.269	0.461	0.536	0.529	0.263	0.348	0.32	0.54	0.53	0.518		15.75	0.199	0.202	0.221	0.212	0.235	0.225	0.231	0.229	0.189	0.262	0.235	0.214	0.175	0.205	0.185	0.285	0.265	0.248		15.75	0.638	0.662	0.737	0.704	0.713	0.779	0.729	0.725	0.79
16	0.401	0.394	0.388	0.348	0.354	0.377	0.294	0.32	0.267	0.462	0.549	0.539	0.263	0.347	0.321	0.549	0.532	0.524		16	0.211	0.214	0.22	0.215	0.243	0.235	0.232	0.23	0.19	0.274	0.238	0.215	0.181	0.203	0.185	0.287	0.271	0.249		16	0.653	0.678	0.754	0.716	0.724	0.798	0.743	0.738	0.805
16.25	0.399	0.393	0.386	0.349	0.356	0.378	0.294	0.32	0.267	0.462	0.52	0.516	0.263	0.348	0.325	0.548	0.532	0.522		16.25	0.204	0.223	0.224	0.221	0.25	0.241	0.237	0.234	0.197	0.271	0.241	0.22	0.179	0.207	0.189	0.292	0.268	0.249		16.25	0.658	0.684	0.769	0.722	0.732	0.803	0.751	0.749	0.812
16.5	0.398	0.391	0.385	0.35	0.357	0.379	0.294	0.324	0.267	0.458	0.537	0.526	0.263	0.348	0.334	0.547	0.543	0.539		16.5	0.206	0.225	0.228	0.224	0.266	0.242	0.244	0.238	0.196	0.276	0.246	0.221	0.179	0.217	0.189	0.293	0.262	0.243		16.5	0.664	0.688	0.772	0.733	0.74	0.799	0.766	0.757	0.808
16.75	0.397	0.391	0.385	0.351	0.358	0.381	0.298	0.329	0.27	0.457	0.515	0.507	0.263	0.35	0.347	0.544	0.549	0.539		16.75	0.209	0.227	0.233	0.227	0.256	0.237	0.243	0.238	0.205	0.266	0.248	0.22	0.184	0.218	0.191	0.295	0.265	0.255		16.75	0.675	0.702	0.791	0.742	0.752	0.82	0.781	0.776	0.827
17	0.393	0.388	0.381	0.351	0.359	0.38	0.3	0.33	0.272	0.45	0.514	0.504	0.263	0.353	0.356	0.544	0.555	0.547		17	0.212	0.234	0.232	0.238	0.253	0.237	0.254	0.238	0.204	0.262	0.257	0.226	0.187	0.215	0.196	0.294	0.269	0.255		17	0.685	0.712	0.805	0.75	0.76	0.824	0.788	0.781	0.838
17.25	0.392	0.387	0.379	0.352	0.359	0.381	0.301	0.33	0.273	0.446	0.512	0.496	0.263	0.36	0.352	0.544	0.56	0.54		17.25	0.218	0.242	0.228	0.243	0.258	0.237	0.261	0.24	0.208	0.265	0.265	0.234	0.189	0.219	0.191	0.296	0.269	0.252		17.25	0.694	0.717	0.806	0.758	0.768	0.822	0.795	0.79	0.831
17.5	0.392	0.388	0.379	0.353	0.36	0.382	0.303	0.332	0.275	0.442	0.502	0.488	0.262	0.374	0.352	0.547	0.557	0.539		17.5	0.22	0.237	0.227	0.25	0.256	0.234	0.259	0.237	0.211	0.263	0.267	0.236	0.191	0.22	0.199	0.303	0.268	0.245		17.5	0.702	0.73	0.817	0.765	0.78	0.828	0.802	0.8	0.855
17.75	0.391	0.387	0.378	0.354	0.361	0.383	0.306	0.333	0.276	0.438	0.502	0.485	0.262	0.38	0.352	0.553	0.557	0.539		17.75	0.225	0.238	0.224	0.258	0.258	0.233	0.26	0.236	0.214	0.264	0.273	0.239	0.195	0.222	0.209	0.3	0.271	0.249		17.75	0.719	0.744	0.824	0.774	0.787	0.82	0.81	0.81	0.849
18	0.39	0.386	0.377	0.354	0.362	0.383	0.307	0.336	0.278	0.435	0.492	0.482	0.262	0.387	0.352	0.554	0.555	0.539		18	0.231	0.241	0.223	0.261	0.259	0.234	0.262	0.236	0.219	0.265	0.28	0.241	0.198	0.226	0.213	0.3	0.273	0.249		18	0.73	0.756	0.838	0.775	0.79	0.818	0.818	0.822	0.843
18.25	0.39	0.386	0.378	0.356	0.363	0.384	0.31	0.338	0.279	0.432	0.493	0.48	0.262	0.384	0.352	0.546	0.557	0.541		18.25	0.236	0.239	0.223	0.27	0.262	0.236	0.262	0.236	0.221	0.267	0.286	0.237	0.202	0.226	0.211	0.299	0.277	0.251		18.25	0.732	0.76	0.833	0.782	0.798	0.806	0.822	0.823	0.83
18.5	0.39	0.386	0.378	0.357	0.364	0.385	0.311	0.34	0.281	0.43	0.483	0.479	0.261	0.384	0.352	0.543	0.554	0.541		18.5	0.239	0.24	0.223	0.274	0.265	0.239	0.26	0.237	0.231	0.269	0.297	0.238	0.213	0.228	0.206	0.298	0.279	0.252		18.5	0.744	0.768	0.851	0.802	0.816	0.817	0.838	0.841	0.839
18.75	0.385	0.382	0.374	0.356	0.363	0.384	0.313	0.341	0.282	0.426	0.479	0.477	0.261	0.383	0.351	0.54	0.555	0.543		18.75	0.248	0.242	0.226	0.283	0.27	0.243	0.261	0.24	0.227	0.27	0.304	0.241	0.22	0.23	0.211	0.3	0.282	0.254		18.75	0.75	0.781	0.849	0.794	0.82	0.799	0.835	0.841	0.821
19	0.383	0.38	0.372	0.354	0.362	0.382	0.315	0.343	0.284	0.423	0.475	0.474	0.26	0.382	0.349	0.54	0.559	0.548		19	0.249	0.246	0.23	0.292	0.275	0.25	0.268	0.245	0.228	0.275	0.319	0.24	0.214	0.231	0.207	0.302	0.288	0.254		19	0.755	0.776	0.854	0.789	0.815	0.786	0.826	0.845	0.812
19.25	0.383	0.382	0.372	0.354	0.362	0.382	0.315	0.344	0.285	0.422	0.474	0.474	0.261	0.382	0.349	0.538	0.564	0.54		19.25	0.254	0.256	0.233	0.277	0.282	0.257	0.277	0.252	0.234	0.278	0.339	0.241	0.215	0.226	0.21	0.306	0.295	0.255		19.25	0.772	0.795	0.882	0.794	0.833	0.799	0.832	0.864	0.834
19.5	0.382	0.381	0.371	0.354	0.361	0.381	0.317	0.345	0.286	0.419	0.471	0.472	0.26	0.382	0.349	0.537	0.558	0.537		19.5	0.264	0.261	0.237	0.279	0.287	0.263	0.283	0.258	0.234	0.283	0.351	0.243	0.213	0.225	0.2	0.31	0.301	0.258		19.5	0.783	0.8	0.857	0.778	0.81	0.784	0.82	0.852	0.81
19.75	0.381	0.38	0.37	0.353	0.361	0.38	0.318	0.347	0.287	0.418	0.469	0.471	0.26	0.381	0.347	0.537	0.552	0.535		19.75	0.268	0.268	0.242	0.283	0.292	0.269	0.286	0.265	0.234	0.288	0.366	0.245	0.208	0.224	0.2	0.312	0.309	0.257		19.75	0.788	0.809	0.874	0.774	0.81	0.782	0.821	0.849	0.814
20	0.381	0.381	0.37	0.354	0.362	0.38	0.32	0.348	0.288	0.416	0.466	0.468	0.26	0.38	0.347	0.532	0.544	0.529		20	0.275	0.269	0.242	0.276	0.293	0.272	0.287	0.266	0.23	0.289	0.371	0.245	0.202	0.226	0.199	0.315	0.318	0.258		20	0.802	0.84	0.893	0.803	0.834	0.808	0.839	0.872	0.838
20.25	0.38	0.38	0.369	0.354	0.362	0.381	0.321	0.348	0.289	0.415	0.463	0.466	0.259	0.38	0.346	0.532	0.547	0.532		20.25	0.292	0.272	0.245	0.28	0.298	0.277	0.292	0.271	0.229	0.294	0.382	0.246	0.199	0.226	0.2	0.316	0.324	0.259		20.25	0.787	0.817	0.866	0.77	0.796	0.787	0.816	0.839	0.819
20.5	0.38	0.381	0.369	0.355	0.362	0.381	0.322	0.349	0.29	0.418	0.462	0.463	0.259	0.38	0.346	0.53	0.547	0.531		20.5	0.281	0.274	0.249	0.285	0.303	0.284	0.297	0.277	0.231	0.298	0.396	0.249	0.2	0.228	0.202	0.321	0.332	0.265		20.5	0.794	0.843	0.868	0.773	0.808	0.788	0.818	0.847	0.822
20.75	0.38	0.381	0.369	0.355	0.363	0.382	0.324	0.352	0.292	0.424	0.46	0.462	0.26	0.38	0.346	0.53	0.547	0.531		20.75	0.281	0.279	0.252	0.288	0.309	0.288	0.302	0.283	0.232	0.301	0.408	0.251	0.2	0.231	0.204	0.322	0.353	0.265		20.75	0.808	0.858	0.874	0.779	0.812	0.792	0.818	0.853	0.83
21	0.38	0.381	0.369	0.356	0.363	0.383	0.325	0.352	0.293	0.432	0.458	0.461	0.26	0.38	0.345	0.53	0.548	0.532		21	0.28	0.282	0.255	0.294	0.315	0.294	0.31	0.29	0.236	0.305	0.422	0.252	0.204	0.232	0.206	0.324	0.361	0.268		21	0.815	0.875	0.871	0.792	0.827	0.802	0.828	0.861	0.837
21.25	0.379	0.379	0.367	0.355	0.363	0.382	0.326	0.353	0.294	0.439	0.456	0.46	0.26	0.379	0.345	0.528	0.545	0.528		21.25	0.279	0.287	0.258	0.3	0.32	0.302	0.316	0.298	0.24	0.309	0.442	0.255	0.206	0.235	0.209	0.328	0.368	0.27		21.25	0.828	0.875	0.886	0.784	0.824	0.799	0.824	0.858	0.841
21.5	0.377	0.377	0.365	0.354	0.362	0.38	0.327	0.354	0.295	0.442	0.456	0.46	0.26	0.379	0.344	0.529	0.547	0.528		21.5	0.287	0.294	0.265	0.309	0.326	0.315	0.329	0.313	0.247	0.316	0.472	0.258	0.21	0.236	0.215	0.33	0.375	0.275		21.5	0.822	0.866	0.874	0.789	0.824	0.796	0.827	0.861	0.836
21.75	0.379	0.38	0.367	0.355	0.362	0.381	0.328	0.355	0.296	0.45	0.455	0.457	0.26	0.379	0.344	0.527	0.544	0.526		21.75	0.297	0.298	0.27	0.317	0.334	0.324	0.339	0.322	0.253	0.325	0.483	0.262	0.214	0.238	0.218	0.332	0.399	0.278		21.75	0.82	0.858	0.868	0.779	0.813	0.788	0.817	0.852	0.832
22	0.379	0.379	0.364	0.354	0.362	0.38	0.328	0.355	0.296	0.458	0.452	0.456	0.26	0.378	0.344	0.524	0.539	0.524		22	0.297	0.303	0.273	0.322	0.338	0.331	0.344	0.33	0.259	0.328	0.489	0.265	0.215	0.242	0.222	0.336	0.4	0.281		22	0.78	0.822	0.847	0.761	0.793	0.782	0.805	0.836	0.806
22.25	0.379	0.378	0.364	0.354	0.361	0.38	0.33	0.356	0.297	0.466	0.452	0.456	0.26	0.378	0.343	0.525	0.541	0.525		22.25	0.302	0.308	0.28	0.332	0.348	0.343	0.357	0.342	0.265	0.334	0.51	0.268	0.22	0.246	0.227	0.337	0.404	0.284		22.25	0.805	0.856	0.88	0.779	0.814	0.789	0.818	0.849	0.831
22.5	0.38	0.38	0.364	0.355	0.362	0.38	0.331	0.356	0.298	0.472	0.45	0.453	0.26	0.378	0.343	0.525	0.54	0.526		22.5	0.304	0.311	0.282	0.337	0.354	0.351	0.365	0.351	0.27	0.336	0.523	0.27	0.223	0.252	0.23	0.34	0.419	0.287		22.5	0.781	0.846	0.875	0.773	0.812	0.788	0.812	0.845	0.823
22.75	0.38	0.38	0.364	0.355	0.363	0.381	0.331	0.357	0.299	0.473	0.449	0.452	0.26	0.377	0.342	0.524	0.538	0.522		22.75	0.305	0.316	0.283	0.34	0.358	0.357	0.367	0.355	0.273	0.339	0.533	0.271	0.224	0.253	0.231	0.343	0.415	0.29		22.75	0.809	0.871	0.892	0.796	0.831	0.803	0.831	0.867	0.845
23	0.381	0.381	0.365	0.356	0.363	0.381	0.333	0.359	0.3	0.472	0.449	0.452	0.26	0.377	0.342	0.525	0.539	0.525		23	0.308	0.318	0.286	0.347	0.364	0.365	0.378	0.365	0.278	0.343	0.541	0.274	0.228	0.256	0.235	0.344	0.423	0.29		23	0.794	0.865	0.884	0.791	0.838	0.801	0.818	0.859	0.844
23.25	0.38	0.38	0.364	0.357	0.363	0.382	0.334	0.359	0.3	0.474	0.447	0.45	0.26	0.376	0.342	0.523	0.537	0.523		23.25	0.312	0.323	0.29	0.354	0.368	0.373	0.387	0.375	0.282	0.346	0.552	0.275	0.231	0.26	0.238	0.345	0.435	0.291		23.25	0.774	0.858	0.879	0.773	0.828	0.787	0.814	0.85	0.829
23.5	0.375	0.379	0.363	0.357	0.363	0.381	0.335	0.36	0.302	0.475	0.446	0.45	0.26	0.376	0.341	0.522	0.536	0.52		23.5	0.318	0.33	0.294	0.363	0.374	0.388	0.399	0.39	0.29	0.352	0.571	0.277	0.236	0.266	0.242	0.349	0.444	0.295		23.5	0.764	0.855	0.882	0.77	0.834	0.788	0.813	0.847	0.83
23.75	0.374	0.378	0.362	0.357	0.363	0.381	0.336	0.361	0.303	0.476	0.446	0.449	0.26	0.376	0.341	0.521	0.535	0.52		23.75	0.32	0.333	0.295	0.366	0.373	0.395	0.4	0.395	0.293	0.355	0.582	0.279	0.238	0.269	0.243	0.35	0.452	0.296		23.75	0.803	0.871	0.902	0.794	0.845	0.806	0.824	0.862	0.849
24	0.373	0.376	0.361	0.356	0.363	0.38	0.336	0.363	0.304	0.475	0.445	0.448	0.26	0.375	0.341	0.518	0.532	0.517		24	0.326	0.341	0.302	0.378	0.375	0.418	0.417	0.415	0.305	0.364	0.606	0.282	0.244	0.279	0.252	0.353	0.476	0.299		24	0.782	0.864	0.898	0.783	0.847	0.798	0.815	0.861	0.844
24.25	0.374	0.377	0.361	0.355	0.362	0.38	0.337	0.363	0.303	0.476	0.444	0.448	0.26	0.374	0.341	0.518	0.531	0.518		24.25	0.332	0.348	0.31	0.388	0.379	0.434	0.427	0.428	0.315	0.371	0.61	0.285	0.25	0.282	0.256	0.355	0.489	0.303		24.25	0.811	0.888	0.911	0.81	0.862	0.824	0.834	0.875	0.867
24.5	0.375	0.377	0.361	0.356	0.363	0.379	0.337	0.364	0.305	0.477	0.443	0.447	0.26	0.374	0.341	0.515	0.529	0.518		24.5	0.336	0.353	0.312	0.393	0.38	0.444	0.434	0.437	0.32	0.377	0.626	0.288	0.253	0.287	0.26	0.358	0.506	0.306		24.5	0.772	0.873	0.903	0.78	0.847	0.803	0.817	0.864	0.843
24.75	0.374	0.377	0.361	0.356	0.362	0.38	0.339	0.364	0.306	0.477	0.443	0.447	0.26	0.375	0.341	0.517	0.53	0.517		24.75	0.343	0.362	0.323	0.412	0.385	0.47	0.456	0.457	0.333	0.39	0.649	0.29	0.265	0.292	0.266	0.36	0.528	0.306		24.75	0.819	0.894	0.914	0.811	0.867	0.828	0.834	0.878	0.87
25	0.374	0.377	0.361	0.357	0.362	0.38	0.34	0.365	0.306	0.478	0.441	0.445	0.26	0.375	0.341	0.517	0.529	0.517		25	0.348	0.37	0.326	0.42	0.39	0.488	0.464	0.469	0.346	0.4	0.664	0.293	0.27	0.3	0.274	0.365	0.536	0.309		25	0.822	0.897	0.913	0.82	0.872	0.832	0.84	0.88	0.874
25.25	0.376	0.376	0.359	0.356	0.362	0.379	0.339	0.364	0.306	0.476	0.441	0.445	0.26	0.374	0.34	0.514	0.526	0.513		25.25	0.351	0.374	0.329	0.425	0.391	0.5	0.473	0.481	0.353	0.404	0.661	0.294	0.272	0.302	0.278	0.369	0.544	0.312		25.25	0.8	0.901	0.92	0.805	0.862	0.813	0.824	0.875	0.859
25.5	0.377	0.377	0.36	0.357	0.363	0.38	0.341	0.366	0.308	0.478	0.44	0.444	0.26	0.374	0.341	0.513	0.526	0.515		25.5	0.356	0.377	0.335	0.44	0.394	0.515	0.487	0.495	0.362	0.411	0.685	0.298	0.278	0.302	0.284	0.37	0.55	0.313		25.5	0.813	0.91	0.929	0.819	0.874	0.83	0.83	0.881	0.877
25.75	0.373	0.374	0.359	0.357	0.363	0.38	0.342	0.366	0.309	0.478	0.44	0.444	0.26	0.374	0.341	0.513	0.524	0.514		25.75	0.364	0.384	0.343	0.453	0.4	0.541	0.502	0.512	0.377	0.426	0.701	0.303	0.289	0.307	0.295	0.376	0.574	0.315		25.75	0.825	0.905	0.919	0.819	0.875	0.823	0.832	0.876	0.868
26	0.371	0.373	0.353	0.356	0.362	0.379	0.342	0.366	0.308	0.477	0.439	0.443	0.26	0.373	0.34	0.513	0.524	0.513		26	0.37	0.389	0.348	0.463	0.406	0.561	0.514	0.524	0.39	0.434	0.702	0.308	0.296	0.311	0.304	0.381	0.588	0.318		26	0.81	0.898	0.928	0.811	0.873	0.827	0.823	0.88	0.86
26.25	0.373	0.374	0.354	0.357	0.362	0.38	0.343	0.367	0.31	0.478	0.439	0.443	0.26	0.374	0.34	0.513	0.524	0.514		26.25	0.372	0.388	0.35	0.469	0.408	0.56	0.52	0.522	0.395	0.436	0.717	0.311	0.3	0.31	0.305	0.383	0.59	0.319		26.25	0.842	0.916	0.929	0.842	0.889	0.852	0.842	0.887	0.88
26.5	0.371	0.372	0.351	0.356	0.361	0.378	0.343	0.366	0.31	0.476	0.438	0.443	0.26	0.373	0.34	0.512	0.523	0.513		26.5	0.378	0.386	0.359	0.484	0.415	0.575	0.538	0.534	0.412	0.449	0.725	0.319	0.308	0.319	0.32	0.388	0.603	0.323		26.5	0.844	0.917	0.929	0.847	0.898	0.857	0.855	0.892	0.885
26.75	0.374	0.372	0.351	0.356	0.362	0.379	0.344	0.368	0.311	0.477	0.438	0.444	0.26	0.374	0.34	0.511	0.521	0.511		26.75	0.387	0.389	0.37	0.498	0.422	0.589	0.554	0.544	0.433	0.464	0.738	0.328	0.319	0.323	0.332	0.398	0.608	0.327		26.75	0.851	0.919	0.93	0.851	0.905	0.86	0.854	0.894	0.886
27	0.373	0.373	0.351	0.356	0.362	0.378	0.345	0.368	0.312	0.477	0.436	0.441	0.261	0.374	0.341	0.509	0.521	0.51		27	0.391	0.391	0.377	0.51	0.429	0.596	0.566	0.55	0.451	0.476	0.744	0.339	0.328	0.324	0.341	0.405	0.613	0.332		27	0.847	0.923	0.941	0.846	0.904	0.865	0.845	0.894	0.886
27.25	0.372	0.371	0.347	0.355	0.361	0.378	0.346	0.368	0.312	0.475	0.437	0.442	0.26	0.374	0.34	0.509	0.52	0.51		27.25	0.396	0.39	0.383	0.52	0.434	0.6	0.579	0.555	0.463	0.482	0.749	0.347	0.333	0.327	0.35	0.41	0.612	0.335		27.25	0.868	0.926	0.936	0.862	0.911	0.875	0.859	0.898	0.893
27.5	0.373	0.37	0.346	0.354	0.36	0.377	0.346	0.369	0.313	0.474	0.436	0.441	0.261	0.374	0.341	0.512	0.52	0.512		27.5	0.401	0.388	0.393	0.533	0.442	0.609	0.588	0.56	0.48	0.488	0.757	0.364	0.34	0.33	0.355	0.422	0.617	0.343		27.5	0.866	0.93	0.939	0.867	0.919	0.88	0.863	0.9	0.895
27.75	0.374	0.372	0.347	0.355	0.361	0.378	0.347	0.37	0.313	0.476	0.437	0.442	0.26	0.374	0.34	0.511	0.517	0.51		27.75	0.402	0.385	0.395	0.539	0.442	0.612	0.588	0.562	0.49	0.486	0.76	0.371	0.344	0.331	0.358	0.43	0.616	0.35		27.75	0.878	0.939	0.944	0.88	0.927	0.892	0.869	0.907	0.899
28	0.373	0.371	0.346	0.355	0.36	0.377	0.347	0.37	0.314	0.476	0.435	0.441	0.26	0.373	0.34	0.509	0.517	0.508		28	0.407	0.383	0.401	0.555	0.447	0.619	0.593	0.566	0.498	0.487	0.753	0.376	0.349	0.33	0.364	0.436	0.615	0.358		28	0.871	0.929	0.936	0.873	0.922	0.879	0.862	0.901	0.89
28.25	0.375	0.371	0.347	0.356	0.361	0.378	0.349	0.371	0.315	0.476	0.436	0.441	0.26	0.374	0.341	0.51	0.519	0.512		28.25	0.412	0.384	0.407	0.568	0.451	0.624	0.599	0.574	0.507	0.492	0.762	0.377	0.357	0.332	0.374	0.444	0.616	0.368		28.25	0.851	0.933	0.948	0.864	0.921	0.875	0.85	0.9	0.877
28.5	0.376	0.371	0.347	0.356	0.361	0.378	0.349	0.372	0.316	0.476	0.435	0.44	0.261	0.373	0.34	0.51	0.519	0.512		28.5	0.416	0.382	0.412	0.579	0.456	0.626	0.601	0.579	0.509	0.492	0.765	0.381	0.364	0.335	0.427	0.452	0.616	0.38		28.5	0.879	0.933	0.942	0.877	0.93	0.891	0.864	0.902	0.889
28.75	0.375	0.371	0.345	0.356	0.361	0.378	0.35	0.372	0.316	0.476	0.434	0.439	0.26	0.374	0.34	0.507	0.519	0.51		28.75	0.42	0.384	0.419	0.592	0.46	0.633	0.606	0.583	0.517	0.494	0.765	0.384	0.371	0.335	0.424	0.461	0.613	0.392		28.75	0.882	0.931	0.943	0.884	0.936	0.895	0.871	0.906	0.89
29	0.376	0.371	0.345	0.357	0.362	0.379	0.35	0.371	0.316	0.477	0.434	0.438	0.261	0.374	0.34	0.507	0.516	0.508		29	0.423	0.384	0.425	0.605	0.464	0.637	0.608	0.587	0.525	0.493	0.758	0.384	0.376	0.336	0.432	0.469	0.613	0.405		29	0.88	0.923	0.938	0.884	0.933	0.894	0.867	0.897	0.89
29.25	0.375	0.37	0.345	0.356	0.361	0.377	0.351	0.373	0.317	0.476	0.434	0.439	0.26	0.374	0.34	0.507	0.515	0.505		29.25	0.431	0.385	0.435	0.626	0.471	0.644	0.616	0.592	0.535	0.495	0.766	0.39	0.389	0.338	0.427	0.479	0.612	0.415		29.25	0.877	0.927	0.941	0.881	0.933	0.893	0.864	0.899	0.886
29.5	0.375	0.369	0.344	0.356	0.361	0.377	0.351	0.374	0.318	0.476	0.434	0.439	0.261	0.374	0.34	0.509	0.516	0.508		29.5	0.444	0.387	0.451	0.647	0.478	0.656	0.633	0.602	0.549	0.502	0.766	0.4	0.401	0.343	0.439	0.485	0.616	0.431		29.5	0.876	0.927	0.946	0.884	0.934	0.895	0.861	0.897	0.883
29.75	0.373	0.367	0.343	0.355	0.36	0.376	0.352	0.374	0.319	0.474	0.434	0.439	0.261	0.374	0.34	0.508	0.517	0.508		29.75	0.452	0.387	0.459	0.658	0.484	0.666	0.64	0.606	0.561	0.509	0.778	0.414	0.416	0.346	0.468	0.5	0.617	0.448		29.75	0.889	0.919	0.941	0.894	0.939	0.909	0.871	0.899	0.892
30	0.376	0.369	0.344	0.355	0.36	0.376	0.353	0.375	0.32	0.474	0.434	0.439	0.261	0.374	0.341	0.508	0.515	0.508		30	0.452	0.385	0.456	0.657	0.483	0.663	0.642	0.606	0.562	0.507	0.785	0.414	0.419	0.348	0.48	0.501	0.618	0.461		30	0.888	0.922	0.944	0.894	0.941	0.905	0.867	0.898	0.887
30.25	0.375	0.37	0.343	0.356	0.361	0.377	0.353	0.375	0.32	0.475	0.433	0.438	0.261	0.374	0.34	0.508	0.515	0.508		30.25	0.455	0.384	0.455	0.659	0.485	0.66	0.642	0.605	0.564	0.504	0.769	0.415	0.424	0.35	0.493	0.501	0.617	0.472		30.25	0.892	0.934	0.958	0.895	0.948	0.906	0.865	0.905	0.888
30.5	0.372	0.369	0.344	0.356	0.361	0.377	0.354	0.376	0.32	0.476	0.433	0.438	0.261	0.373	0.34	0.507	0.516	0.507		30.5	0.46	0.385	0.456	0.666	0.489	0.662	0.644	0.608	0.568	0.507	0.766	0.418	0.433	0.352	0.504	0.506	0.617	0.491		30.5	0.896	0.929	0.951	0.897	0.944	0.913	0.864	0.9	0.891
30.75	0.372	0.369	0.343	0.357	0.361	0.377	0.355	0.376	0.321	0.476	0.433	0.437	0.26	0.374	0.34	0.507	0.515	0.506		30.75	0.46	0.385	0.453	0.662	0.492	0.66	0.642	0.606	0.567	0.504	0.768	0.418	0.432	0.353	0.514	0.507	0.615	0.493		30.75	0.897	0.927	0.95	0.903	0.948	0.919	0.867	0.897	0.894
31	0.37	0.367	0.343	0.357	0.361	0.377	0.356	0.378	0.322	0.476	0.432	0.438	0.261	0.374	0.34	0.505	0.511	0.505		31	0.469	0.387	0.458	0.673	0.498	0.662	0.648	0.611	0.574	0.505	0.762	0.42	0.444	0.357	0.517	0.511	0.616	0.495		31	0.899	0.926	0.949	0.904	0.947	0.92	0.867	0.897	0.893
31.25	0.368	0.366	0.341	0.357	0.362	0.377	0.356	0.378	0.322	0.476	0.432	0.437	0.261	0.374	0.34	0.505	0.51	0.503		31.25	0.475	0.389	0.459	0.68	0.502	0.665	0.65	0.611	0.576	0.506	0.765	0.419	0.454	0.359	0.533	0.51	0.617	0.494		31.25	0.902	0.928	0.949	0.909	0.953	0.921	0.867	0.903	0.902
31.5	0.368	0.365	0.34	0.356	0.361	0.377	0.356	0.378	0.322	0.476	0.432	0.437	0.26	0.373	0.34	0.505	0.511	0.504		31.5	0.48	0.389	0.458	0.681	0.504	0.664	0.652	0.612	0.578	0.503	0.743	0.418	0.457	0.36	0.552	0.511	0.618	0.498		31.5	0.902	0.935	0.955	0.903	0.949	0.91	0.864	0.9	0.882
31.75	0.369	0.363	0.345	0.355	0.36	0.376	0.357	0.378	0.324	0.475	0.432	0.438	0.261	0.375	0.34	0.505	0.512	0.504		31.75	0.499	0.393	0.469	0.699	0.513	0.68	0.665	0.622	0.591	0.515	0.753	0.425	0.47	0.364	0.578	0.521	0.622	0.503		31.75	0.917	0.939	0.96	0.915	0.963	0.932	0.875	0.909	0.9
32	0.371	0.364	0.346	0.355	0.36	0.375	0.357	0.378	0.323	0.475	0.432	0.436	0.261	0.373	0.34	0.505	0.511	0.503		32	0.502	0.394	0.466	0.701	0.516	0.68	0.666	0.622	0.592	0.514	0.736	0.426	0.472	0.366	0.555	0.523	0.621	0.507		32	0.909	0.932	0.953	0.915	0.958	0.933	0.881	0.906	0.897
32.25	0.373	0.364	0.347	0.356	0.36	0.376	0.358	0.379	0.324	0.476	0.432	0.437	0.261	0.374	0.34	0.505	0.511	0.504		32.25	0.507	0.396	0.469	0.705	0.521	0.682	0.668	0.625	0.592	0.518	0.739	0.428	0.48	0.368	0.559	0.527	0.624	0.51		32.25	0.912	0.931	0.951	0.916	0.959	0.929	0.873	0.902	0.899
32.5	0.371	0.363	0.346	0.356	0.36	0.376	0.359	0.38	0.325	0.475	0.432	0.438	0.261	0.375	0.34	0.505	0.511	0.504		32.5	0.521	0.399	0.475	0.714	0.527	0.69	0.675	0.63	0.599	0.523	0.745	0.434	0.491	0.373	0.566	0.532	0.628	0.513		32.5	0.924	0.94	0.959	0.925	0.97	0.939	0.882	0.909	0.906
32.75	0.372	0.365	0.346	0.357	0.36	0.377	0.359	0.38	0.326	0.476	0.431	0.437	0.261	0.374	0.34	0.504	0.509	0.502		32.75	0.519	0.4	0.474	0.716	0.528	0.688	0.676	0.628	0.598	0.521	0.735	0.432	0.492	0.375	0.571	0.533	0.627	0.516		32.75	0.928	0.945	0.968	0.925	0.97	0.929	0.878	0.91	0.898
33	0.374	0.365	0.347	0.358	0.361	0.378	0.361	0.381	0.327	0.477	0.431	0.437	0.261	0.374	0.34	0.505	0.511	0.504		33	0.52	0.401	0.472	0.715	0.529	0.684	0.674	0.626	0.596	0.519	0.728	0.43	0.492	0.377	0.582	0.533	0.626	0.518		33	0.914	0.931	0.948	0.917	0.96	0.923	0.873	0.903	0.892
33.25	0.374	0.363	0.348	0.358	0.362	0.378	0.362	0.382	0.328	0.478	0.43	0.437	0.261	0.375	0.34	0.504	0.51	0.503		33.25	0.527	0.403	0.475	0.72	0.533	0.687	0.678	0.627	0.598	0.521	0.729	0.432	0.5	0.381	0.583	0.536	0.629	0.521		33.25	0.919	0.939	0.955	0.921	0.964	0.925	0.877	0.907	0.891
33.5	0.373	0.362	0.346	0.357	0.361	0.377	0.362	0.382	0.328	0.477	0.431	0.437	0.261	0.375	0.34	0.504	0.509	0.503		33.5	0.53	0.404	0.477	0.723	0.536	0.686	0.679	0.627	0.599	0.521	0.717	0.431	0.504	0.383	0.606	0.536	0.631	0.523		33.5	0.913	0.929	0.946	0.918	0.958	0.92	0.873	0.901	0.89
33.75	0.376	0.364	0.346	0.357	0.361	0.377	0.362	0.383	0.328	0.477	0.431	0.436	0.262	0.375	0.34	0.503	0.508	0.501		33.75	0.532	0.404	0.477	0.727	0.538	0.685	0.681	0.628	0.601	0.523	0.717	0.429	0.503	0.387	0.606	0.536	0.633	0.526		33.75	0.921	0.932	0.953	0.924	0.961	0.931	0.878	0.902	0.9
34	0.376	0.365	0.346	0.358	0.361	0.377	0.363	0.382	0.328	0.478	0.43	0.435	0.261	0.374	0.34	0.501	0.506	0.5		34	0.529	0.405	0.475	0.726	0.54	0.682	0.68	0.625	0.599	0.522	0.709	0.428	0.497	0.389	0.596	0.537	0.633	0.527		34	0.923	0.936	0.955	0.931	0.966	0.94	0.88	0.902	0.908
34.25	0.376	0.363	0.345	0.357	0.361	0.377	0.363	0.383	0.329	0.476	0.431	0.437	0.261	0.376	0.34	0.503	0.507	0.5		34.25	0.536	0.408	0.48	0.732	0.544	0.685	0.683	0.628	0.603	0.523	0.72	0.429	0.509	0.392	0.609	0.538	0.636	0.529		34.25	0.926	0.936	0.953	0.931	0.963	0.935	0.881	0.906	0.901
34.5	0.378	0.363	0.344	0.357	0.361	0.376	0.364	0.384	0.33	0.476	0.431	0.437	0.262	0.375	0.34	0.502	0.508	0.5		34.5	0.539	0.412	0.485	0.741	0.55	0.695	0.689	0.631	0.608	0.53	0.723	0.435	0.513	0.398	0.609	0.545	0.642	0.536		34.5	0.935	0.942	0.959	0.939	0.973	0.944	0.882	0.91	0.911
34.75	0.38	0.364	0.345	0.358	0.362	0.377	0.364	0.385	0.331	0.478	0.431	0.436	0.262	0.376	0.341	0.502	0.507	0.5		34.75	0.538	0.414	0.484	0.741	0.552	0.693	0.689	0.63	0.606	0.529	0.714	0.432	0.513	0.399	0.605	0.545	0.643	0.535		34.75	0.925	0.931	0.953	0.932	0.964	0.941	0.884	0.904	0.909
35	0.379	0.362	0.343	0.358	0.361	0.376	0.365	0.384	0.331	0.477	0.43	0.436	0.262	0.375	0.341	0.502	0.506	0.5		35	0.543	0.417	0.49	0.749	0.557	0.698	0.693	0.633	0.614	0.537	0.712	0.435	0.52	0.404	0.61	0.55	0.645	0.538		35	0.93	0.936	0.954	0.938	0.968	0.947	0.886	0.907	0.913
35.25	0.379	0.363	0.344	0.359	0.362	0.377	0.367	0.386	0.332	0.479	0.43	0.436	0.262	0.377	0.341	0.503	0.507	0.501		35.25	0.54	0.418	0.487	0.749	0.557	0.694	0.692	0.63	0.611	0.534	0.717	0.433	0.519	0.405	0.606	0.55	0.647	0.539		35.25	0.936	0.945	0.962	0.942	0.976	0.95	0.889	0.915	0.917
35.5	0.379	0.363	0.343	0.359	0.362	0.378	0.367	0.387	0.333	0.479	0.43	0.436	0.262	0.376	0.341	0.501	0.505	0.5		35.5	0.54	0.42	0.487	0.751	0.559	0.692	0.691	0.629	0.609	0.532	0.708	0.43	0.517	0.407	0.601	0.551	0.649	0.539		35.5	0.927	0.936	0.952	0.936	0.967	0.939	0.883	0.903	0.913
35.75	0.376	0.362	0.342	0.358	0.362	0.377	0.367	0.387	0.333	0.477	0.43	0.436	0.261	0.375	0.34	0.502	0.506	0.499		35.75	0.542	0.423	0.489	0.751	0.561	0.69	0.692	0.627	0.608	0.531	0.704	0.428	0.52	0.41	0.598	0.55	0.651	0.539		35.75	0.92	0.927	0.944	0.931	0.958	0.939	0.883	0.897	0.91
36	0.376	0.362	0.342	0.359	0.362	0.377	0.368	0.387	0.334	0.478	0.43	0.435	0.261	0.374	0.34	0.5	0.504	0.498		36	0.54	0.423	0.488	0.754	0.561	0.687	0.691	0.624	0.606	0.529	0.7	0.426	0.518	0.411	0.595	0.548	0.652	0.54		36	0.92	0.928	0.945	0.933	0.957	0.94	0.881	0.901	0.907
36.25	0.381	0.368	0.341	0.356	0.361	0.376	0.367	0.388	0.334	0.476	0.43	0.436	0.261	0.375	0.34	0.501	0.506	0.499		36.25	0.541	0.426	0.489	0.755	0.563	0.687	0.691	0.623	0.607	0.528	0.7	0.426	0.521	0.415	0.6	0.553	0.657	0.545		36.25	0.93	0.937	0.952	0.938	0.962	0.944	0.883	0.904	0.912
36.5	0.379	0.369	0.341	0.356	0.361	0.375	0.369	0.389	0.335	0.475	0.43	0.436	0.261	0.379	0.34	0.501	0.505	0.5		36.5	0.541	0.429	0.49	0.757	0.566	0.684	0.693	0.622	0.606	0.527	0.701	0.422	0.524	0.418	0.6	0.55	0.66	0.544		36.5	0.935	0.942	0.963	0.945	0.974	0.959	0.896	0.909	0.919
36.75	0.381	0.371	0.344	0.357	0.361	0.376	0.369	0.389	0.335	0.476	0.43	0.436	0.262	0.38	0.341	0.502	0.507	0.5		36.75	0.542	0.431	0.494	0.76	0.568	0.688	0.696	0.624	0.608	0.533	0.704	0.423	0.527	0.421	0.602	0.552	0.662	0.546		36.75	0.929	0.934	0.957	0.946	0.966	0.951	0.893	0.908	0.92
37	0.39	0.383	0.342	0.356	0.36	0.375	0.37	0.389	0.336	0.474	0.431	0.437	0.262	0.38	0.34	0.501	0.506	0.5		37	0.544	0.434	0.495	0.766	0.571	0.692	0.699	0.624	0.609	0.538	0.708	0.421	0.535	0.426	0.608	0.553	0.673	0.548		37	0.936	0.943	0.969	0.951	0.971	0.965	0.898	0.916	0.924
37.25	0.392	0.386	0.345	0.357	0.361	0.376	0.371	0.39	0.337	0.476	0.431	0.436	0.262	0.379	0.34	0.501	0.505	0.5		37.25	0.543	0.436	0.494	0.767	0.573	0.689	0.698	0.623	0.608	0.534	0.703	0.418	0.533	0.427	0.608	0.552	0.672	0.546		37.25	0.931	0.936	0.958	0.944	0.964	0.966	0.893	0.908	0.918
37.5	0.391	0.385	0.342	0.356	0.359	0.375	0.371	0.39	0.337	0.473	0.43	0.435	0.261	0.378	0.34	0.5	0.507	0.499		37.5	0.546	0.438	0.496	0.767	0.573	0.688	0.698	0.622	0.607	0.535	0.707	0.419	0.536	0.429	0.608	0.554	0.676	0.546		37.5	0.94	0.944	0.975	0.954	0.98	0.974	0.903	0.918	0.923
37.75	0.392	0.385	0.344	0.356	0.359	0.375	0.372	0.39	0.338	0.474	0.43	0.437	0.262	0.38	0.34	0.5	0.505	0.499		37.75	0.545	0.441	0.498	0.771	0.576	0.691	0.701	0.623	0.608	0.538	0.702	0.42	0.54	0.433	0.609	0.558	0.68	0.549		37.75	0.934	0.946	0.965	0.952	0.971	0.968	0.903	0.921	0.92
38	0.394	0.387	0.344	0.356	0.36	0.375	0.373	0.392	0.339	0.475	0.431	0.436	0.262	0.378	0.34	0.5	0.505	0.499		38	0.541	0.44	0.494	0.767	0.577	0.687	0.698	0.62	0.605	0.533	0.693	0.416	0.536	0.433	0.602	0.558	0.68	0.547		38	0.935	0.942	0.959	0.949	0.965	0.971	0.896	0.91	0.921
38.25	0.393	0.386	0.343	0.356	0.36	0.375	0.373	0.391	0.339	0.475	0.431	0.436	0.261	0.377	0.34	0.5	0.505	0.499		38.25	0.541	0.442	0.494	0.767	0.578	0.685	0.697	0.617	0.602	0.533	0.689	0.414	0.536	0.435	0.602	0.557	0.68	0.548		38.25	0.929	0.938	0.956	0.945	0.958	0.969	0.893	0.904	0.919
38.5	0.394	0.388	0.341	0.357	0.36	0.376	0.374	0.392	0.339	0.476	0.43	0.436	0.262	0.375	0.339	0.5	0.507	0.498		38.5	0.541	0.443	0.494	0.768	0.58	0.682	0.697	0.616	0.601	0.533	0.683	0.412	0.537	0.436	0.6	0.557	0.683	0.548		38.5	0.915	0.923	0.945	0.936	0.946	0.963	0.888	0.894	0.912
38.75	0.394	0.388	0.341	0.356	0.36	0.375	0.374	0.392	0.34	0.475	0.43	0.435	0.261	0.375	0.339	0.499	0.505	0.495		38.75	0.542	0.445	0.495	0.768	0.58	0.68	0.697	0.614	0.599	0.531	0.683	0.411	0.539	0.438	0.598	0.557	0.683	0.548		38.75	0.937	0.942	0.966	0.954	0.963	0.978	0.896	0.91	0.918
39	0.393	0.388	0.339	0.358	0.361	0.376	0.375	0.392	0.341	0.476	0.43	0.436	0.262	0.376	0.339	0.499	0.506	0.495		39	0.541	0.448	0.495	0.769	0.584	0.678	0.696	0.613	0.597	0.53	0.677	0.408	0.54	0.44	0.596	0.556	0.685	0.548		39	0.948	0.956	0.978	0.966	0.978	0.982	0.903	0.922	0.93
39.25	0.395	0.385	0.342	0.358	0.361	0.376	0.377	0.395	0.342	0.476	0.431	0.437	0.263	0.378	0.34	0.499	0.506	0.496		39.25	0.542	0.451	0.496	0.771	0.587	0.677	0.698	0.613	0.598	0.533	0.681	0.413	0.541	0.443	0.598	0.561	0.689	0.552		39.25	0.945	0.955	0.973	0.965	0.974	0.984	0.904	0.913	0.93
39.5	0.397	0.384	0.342	0.358	0.361	0.375	0.377	0.395	0.342	0.477	0.431	0.437	0.263	0.376	0.34	0.499	0.505	0.495		39.5	0.543	0.453	0.497	0.771	0.591	0.677	0.697	0.611	0.597	0.532	0.678	0.412	0.541	0.444	0.597	0.561	0.689	0.551		39.5	0.946	0.961	0.973	0.963	0.977	0.988	0.906	0.916	0.93
39.75	0.394	0.377	0.34	0.356	0.359	0.373	0.377	0.395	0.343	0.473	0.431	0.437	0.263	0.375	0.339	0.5	0.504	0.495		39.75	0.544	0.454	0.499	0.771	0.591	0.676	0.698	0.611	0.597	0.532	0.686	0.411	0.546	0.447	0.598	0.562	0.695	0.554		39.75	0.959	0.968	0.991	0.969	0.982	0.985	0.906	0.92	0.927
40	0.395	0.377	0.34	0.356	0.359	0.373	0.377	0.395	0.343	0.473	0.431	0.437	0.263	0.374	0.339	0.499	0.504	0.494		40	0.544	0.454	0.497	0.772	0.59	0.675	0.697	0.609	0.595	0.531	0.681	0.408	0.545	0.447	0.596	0.559	0.694	0.551		40	0.947	0.956	0.971	0.96	0.972	0.98	0.902	0.911	0.927
40.25	0.394	0.378	0.339	0.357	0.359	0.374	0.379	0.396	0.344	0.475	0.43	0.436	0.263	0.383	0.34	0.5	0.503	0.495		40.25	0.542	0.457	0.496	0.772	0.593	0.674	0.696	0.609	0.598	0.53	0.682	0.409	0.545	0.45	0.594	0.562	0.699	0.553		40.25	0.945	0.958	0.97	0.959	0.974	0.984	0.905	0.909	0.926
40.5	0.395	0.378	0.341	0.358	0.361	0.376	0.38	0.398	0.345	0.477	0.431	0.438	0.263	0.38	0.341	0.5	0.503	0.496		40.5	0.541	0.46	0.495	0.771	0.595	0.672	0.696	0.606	0.597	0.531	0.677	0.406	0.545	0.452	0.593	0.563	0.697	0.553		40.5	0.924	0.939	0.949	0.943	0.951	0.969	0.891	0.894	0.915
40.75	0.395	0.378	0.34	0.359	0.362	0.376	0.381	0.398	0.346	0.478	0.431	0.438	0.263	0.379	0.34	0.5	0.502	0.495		40.75	0.54	0.461	0.493	0.77	0.597	0.669	0.693	0.605	0.594	0.529	0.676	0.405	0.544	0.452	0.591	0.563	0.695	0.552		40.75	0.936	0.948	0.957	0.951	0.961	0.977	0.891	0.902	0.92
41	0.395	0.373	0.338	0.359	0.361	0.376	0.381	0.398	0.346	0.478	0.431	0.438	0.263	0.376	0.34	0.5	0.503	0.496		41	0.541	0.462	0.495	0.772	0.599	0.668	0.693	0.603	0.593	0.529	0.674	0.403	0.545	0.454	0.591	0.563	0.696	0.553		41	0.946	0.952	0.968	0.953	0.96	0.976	0.897	0.9	0.924
41.25	0.395	0.372	0.338	0.358	0.36	0.374	0.381	0.398	0.346	0.476	0.43	0.437	0.262	0.374	0.339	0.5	0.503	0.494		41.25	0.54	0.463	0.494	0.77	0.599	0.666	0.691	0.6	0.59	0.527	0.67	0.402	0.542	0.454	0.589	0.562	0.694	0.55		41.25	0.947	0.953	0.962	0.955	0.961	0.979	0.897	0.901	0.923
41.5	0.394	0.374	0.337	0.358	0.36	0.374	0.382	0.399	0.348	0.476	0.431	0.438	0.263	0.378	0.339	0.501	0.503	0.496		41.5	0.539	0.463	0.493	0.77	0.601	0.662	0.69	0.599	0.588	0.524	0.67	0.4	0.544	0.455	0.586	0.561	0.698	0.549		41.5	0.936	0.946	0.955	0.95	0.956	0.98	0.896	0.897	0.919
41.75	0.392	0.375	0.333	0.357	0.359	0.374	0.382	0.398	0.347	0.475	0.432	0.439	0.263	0.377	0.339	0.501	0.503	0.495		41.75	0.542	0.467	0.495	0.77	0.601	0.663	0.69	0.598	0.592	0.523	0.676	0.399	0.547	0.457	0.588	0.562	0.704	0.547		41.75	0.956	0.961	0.971	0.962	0.969	0.993	0.905	0.907	0.93
42	0.394	0.377	0.334	0.359	0.36	0.374	0.383	0.397	0.347	0.475	0.431	0.437	0.263	0.378	0.34	0.499	0.501	0.494		42	0.542	0.465	0.495	0.775	0.609	0.664	0.691	0.603	0.592	0.524	0.674	0.4	0.55	0.457	0.592	0.573	0.711	0.546		42	0.944	0.953	0.958	0.953	0.961	0.985	0.899	0.9	0.924
42.25	0.395	0.375	0.332	0.358	0.359	0.373	0.384	0.399	0.348	0.473	0.432	0.437	0.262	0.38	0.339	0.499	0.502	0.492		42.25	0.543	0.464	0.496	0.777	0.612	0.663	0.69	0.6	0.592	0.523	0.67	0.399	0.551	0.458	0.592	0.572	0.712	0.548		42.25	0.937	0.946	0.953	0.948	0.956	0.982	0.898	0.899	0.921
42.5	0.395	0.375	0.332	0.358	0.359	0.373	0.384	0.398	0.348	0.474	0.431	0.438	0.263	0.374	0.339	0.499	0.501	0.493		42.5	0.541	0.464	0.494	0.775	0.611	0.66	0.689	0.599	0.59	0.522	0.669	0.397	0.551	0.459	0.589	0.571	0.715	0.545		42.5	0.952	0.956	0.965	0.957	0.97	0.99	0.903	0.908	0.924
42.75	0.397	0.377	0.333	0.359	0.36	0.374	0.386	0.4	0.35	0.475	0.432	0.438	0.263	0.379	0.339	0.5	0.502	0.494		42.75	0.541	0.466	0.494	0.775	0.613	0.659	0.689	0.598	0.589	0.521	0.663	0.399	0.552	0.461	0.587	0.574	0.716	0.546		42.75	0.952	0.96	0.969	0.965	0.977	0.999	0.906	0.908	0.934
43	0.397	0.378	0.333	0.36	0.36	0.375	0.386	0.4	0.35	0.476	0.432	0.439	0.263	0.375	0.339	0.499	0.501	0.493		43	0.54	0.468	0.493	0.774	0.615	0.657	0.687	0.596	0.587	0.519	0.658	0.397	0.552	0.463	0.586	0.574	0.714	0.545		43	0.941	0.948	0.954	0.952	0.962	0.985	0.892	0.9	0.921
43.25	0.397	0.378	0.334	0.36	0.361	0.375	0.387	0.402	0.351	0.477	0.432	0.439	0.262	0.377	0.339	0.499	0.5	0.492		43.25	0.539	0.468	0.49	0.772	0.616	0.654	0.685	0.593	0.584	0.518	0.657	0.397	0.55	0.464	0.583	0.574	0.713	0.544		43.25	0.931	0.934	0.943	0.942	0.95	0.978	0.891	0.891	0.918
43.5	0.397	0.378	0.334	0.361	0.362	0.376	0.388	0.403	0.352	0.478	0.433	0.439	0.262	0.376	0.339	0.5	0.501	0.494		43.5	0.538	0.47	0.489	0.771	0.618	0.651	0.684	0.591	0.582	0.517	0.653	0.395	0.549	0.465	0.581	0.574	0.713	0.544		43.5	0.938	0.94	0.95	0.948	0.955	0.985	0.896	0.896	0.92
43.75	0.398	0.378	0.334	0.361	0.362	0.376	0.389	0.403	0.352	0.478	0.432	0.438	0.262	0.373	0.338	0.499	0.5	0.491		43.75	0.54	0.471	0.489	0.77	0.618	0.649	0.683	0.589	0.58	0.516	0.65	0.393	0.548	0.466	0.58	0.573	0.711	0.543		43.75	0.947	0.944	0.96	0.953	0.963	0.992	0.898	0.897	0.927
44	0.397	0.377	0.333	0.361	0.362	0.376	0.39	0.403	0.353	0.477	0.432	0.438	0.262	0.375	0.339	0.5	0.501	0.494		44	0.54	0.473	0.489	0.769	0.62	0.646	0.682	0.587	0.577	0.517	0.648	0.391	0.549	0.468	0.58	0.572	0.713	0.543		44	0.942	0.941	0.953	0.951	0.957	0.989	0.898	0.897	0.925
44.25	0.397	0.379	0.333	0.361	0.362	0.375	0.39	0.404	0.353	0.477	0.432	0.439	0.262	0.377	0.338	0.498	0.501	0.491		44.25	0.54	0.475	0.488	0.768	0.62	0.645	0.681	0.585	0.576	0.516	0.643	0.39	0.546	0.468	0.576	0.573	0.712	0.543		44.25	0.933	0.934	0.945	0.946	0.951	0.986	0.892	0.889	0.922
44.5	0.396	0.381	0.334	0.362	0.362	0.376	0.391	0.405	0.354	0.478	0.431	0.438	0.262	0.376	0.338	0.499	0.5	0.491		44.5	0.542	0.478	0.489	0.769	0.622	0.643	0.68	0.582	0.575	0.515	0.639	0.39	0.548	0.471	0.577	0.576	0.71	0.545		44.5	0.944	0.947	0.955	0.955	0.963	0.997	0.9	0.897	0.933
44.75	0.396	0.38	0.332	0.36	0.361	0.374	0.391	0.405	0.355	0.476	0.432	0.441	0.262	0.379	0.338	0.498	0.5	0.491		44.75	0.544	0.477	0.49	0.769	0.619	0.642	0.679	0.581	0.574	0.513	0.641	0.388	0.549	0.477	0.577	0.573	0.713	0.544		44.75	0.972	0.971	0.983	0.978	0.989	1.008	0.916	0.924	0.935
45	0.396	0.38	0.333	0.36	0.362	0.374	0.392	0.406	0.356	0.477	0.432	0.441	0.263	0.374	0.338	0.497	0.499	0.491		45	0.543	0.479	0.489	0.767	0.618	0.639	0.678	0.58	0.572	0.513	0.634	0.386	0.548	0.478	0.574	0.573	0.708	0.542		45	0.967	0.968	0.977	0.977	0.99	1.012	0.915	0.919	0.941
45.25	0.396	0.381	0.333	0.361	0.362	0.375	0.394	0.408	0.357	0.477	0.433	0.442	0.263	0.382	0.339	0.5	0.5	0.492		45.25	0.542	0.479	0.486	0.766	0.618	0.637	0.677	0.578	0.571	0.51	0.633	0.385	0.548	0.479	0.572	0.573	0.709	0.54		45.25	0.968	0.971	0.976	0.98	0.992	1.017	0.919	0.919	0.946
45.5	0.396	0.382	0.333	0.362	0.362	0.375	0.394	0.407	0.357	0.478	0.432	0.442	0.262	0.376	0.339	0.498	0.499	0.491		45.5	0.542	0.48	0.486	0.765	0.618	0.634	0.676	0.576	0.569	0.508	0.631	0.384	0.548	0.48	0.572	0.573	0.709	0.539		45.5	0.951	0.955	0.962	0.967	0.977	1.007	0.91	0.911	0.939
45.75	0.397	0.382	0.334	0.363	0.363	0.376	0.395	0.408	0.358	0.478	0.432	0.442	0.262	0.379	0.338	0.497	0.498	0.49		45.75	0.541	0.481	0.484	0.763	0.618	0.632	0.674	0.574	0.567	0.509	0.628	0.383	0.546	0.48	0.569	0.573	0.708	0.54		45.75	0.955	0.954	0.963	0.967	0.978	1.005	0.91	0.907	0.937
46	0.396	0.382	0.332	0.362	0.363	0.376	0.395	0.408	0.358	0.479	0.432	0.442	0.262	0.375	0.338	0.496	0.497	0.488		46	0.541	0.481	0.484	0.762	0.617	0.63	0.672	0.572	0.564	0.508	0.622	0.38	0.546	0.481	0.567	0.572	0.706	0.538		46	0.945	0.95	0.957	0.964	0.974	1.004	0.907	0.909	0.934
46.25	0.397	0.382	0.334	0.363	0.363	0.376	0.395	0.409	0.358	0.48	0.432	0.441	0.262	0.373	0.337	0.495	0.496	0.487		46.25	0.542	0.481	0.483	0.762	0.618	0.628	0.672	0.57	0.562	0.508	0.618	0.381	0.546	0.482	0.567	0.574	0.702	0.538		46.25	0.956	0.956	0.966	0.973	0.982	1.01	0.908	0.908	0.939
46.5	0.398	0.383	0.334	0.365	0.365	0.377	0.398	0.411	0.36	0.48	0.433	0.442	0.262	0.378	0.338	0.498	0.499	0.49		46.5	0.541	0.485	0.482	0.758	0.618	0.625	0.67	0.569	0.561	0.505	0.618	0.379	0.546	0.483	0.565	0.573	0.705	0.537		46.5	0.951	0.951	0.964	0.97	0.977	1.008	0.906	0.907	0.936
46.75	0.397	0.383	0.333	0.363	0.363	0.376	0.396	0.41	0.359	0.479	0.432	0.442	0.262	0.372	0.338	0.495	0.495	0.487		46.75	0.543	0.486	0.482	0.759	0.617	0.623	0.669	0.566	0.559	0.505	0.614	0.378	0.546	0.483	0.564	0.57	0.696	0.536		46.75	0.951	0.946	0.965	0.973	0.978	1.006	0.904	0.907	0.938
47	0.397	0.383	0.333	0.364	0.364	0.376	0.399	0.412	0.362	0.479	0.434	0.443	0.262	0.382	0.338	0.496	0.495	0.488		47	0.542	0.486	0.481	0.758	0.619	0.623	0.668	0.565	0.557	0.504	0.614	0.376	0.545	0.483	0.562	0.57	0.701	0.535		47	0.954	0.949	0.965	0.975	0.979	1.008	0.904	0.91	0.939
47.25	0.397	0.383	0.332	0.364	0.365	0.376	0.4	0.412	0.362	0.479	0.434	0.443	0.262	0.379	0.338	0.497	0.497	0.488		47.25	0.543	0.485	0.479	0.757	0.618	0.62	0.667	0.563	0.556	0.505	0.614	0.375	0.545	0.485	0.561	0.569	0.701	0.535		47.25	0.951	0.952	0.963	0.972	0.976	1.008	0.906	0.908	0.941
47.5	0.397	0.383	0.333	0.365	0.366	0.377	0.402	0.414	0.363	0.481	0.433	0.443	0.263	0.381	0.339	0.498	0.497	0.489		47.5	0.542	0.488	0.478	0.755	0.619	0.619	0.666	0.562	0.555	0.503	0.612	0.374	0.547	0.487	0.559	0.571	0.7	0.534		47.5	0.952	0.951	0.96	0.971	0.975	1.008	0.91	0.907	0.939
47.75	0.397	0.382	0.333	0.366	0.366	0.378	0.401	0.414	0.364	0.481	0.433	0.442	0.263	0.381	0.339	0.497	0.497	0.488		47.75	0.543	0.489	0.478	0.754	0.62	0.617	0.665	0.56	0.554	0.502	0.612	0.372	0.546	0.488	0.559	0.57	0.696	0.534		47.75	0.943	0.946	0.955	0.966	0.969	1.006	0.912	0.904	0.935
48	0.398	0.382	0.334	0.366	0.367	0.378	0.403	0.416	0.366	0.482	0.435	0.444	0.263	0.385	0.339	0.497	0.497	0.488		48	0.543	0.491	0.478	0.753	0.621	0.617	0.664	0.558	0.552	0.503	0.615	0.372	0.548	0.489	0.558	0.57	0.693	0.532		48	0.942	0.942	0.953	0.963	0.968	1.005	0.907	0.904	0.933
48.25	0.398	0.382	0.334	0.367	0.367	0.378	0.404	0.416	0.366	0.482	0.434	0.443	0.263	0.384	0.339	0.497	0.496	0.488		48.25	0.544	0.491	0.477	0.752	0.62	0.615	0.663	0.557	0.552	0.501	0.612	0.37	0.547	0.491	0.557	0.57	0.692	0.531		48.25	0.949	0.945	0.964	0.965	0.97	1.004	0.908	0.899	0.936
48.5	0.397	0.382	0.334	0.368	0.368	0.379	0.405	0.416	0.366	0.483	0.434	0.443	0.263	0.381	0.339	0.497	0.496	0.488		48.5	0.542	0.492	0.474	0.749	0.62	0.613	0.661	0.554	0.55	0.5	0.609	0.368	0.546	0.492	0.556	0.569	0.691	0.53		48.5	0.942	0.937	0.951	0.962	0.964	1.001	0.902	0.898	0.935
48.75	0.397	0.382	0.334	0.367	0.367	0.378	0.404	0.416	0.366	0.482	0.435	0.443	0.262	0.381	0.339	0.497	0.497	0.488		48.75	0.542	0.494	0.474	0.75	0.621	0.61	0.66	0.553	0.549	0.5	0.608	0.367	0.547	0.493	0.554	0.568	0.686	0.529		48.75	0.961	0.954	0.973	0.977	0.98	1.011	0.915	0.907	0.939
49	0.398	0.382	0.333	0.367	0.367	0.378	0.405	0.416	0.367	0.482	0.434	0.444	0.262	0.378	0.338	0.496	0.495	0.486		49	0.543	0.492	0.473	0.748	0.62	0.608	0.658	0.551	0.547	0.5	0.605	0.365	0.546	0.493	0.553	0.569	0.686	0.529		49	0.963	0.96	0.968	0.982	0.984	1.013	0.914	0.911	0.939
49.25	0.398	0.383	0.332	0.367	0.367	0.378	0.405	0.417	0.367	0.483	0.434	0.443	0.263	0.376	0.338	0.496	0.494	0.485		49.25	0.544	0.491	0.472	0.747	0.62	0.607	0.656	0.55	0.546	0.5	0.599	0.366	0.545	0.495	0.551	0.571	0.681	0.531		49.25	0.968	0.962	0.976	0.987	0.989	1.014	0.917	0.91	0.944
49.5	0.397	0.382	0.332	0.369	0.368	0.378	0.408	0.419	0.369	0.482	0.436	0.444	0.263	0.389	0.339	0.496	0.494	0.487		49.5	0.543	0.494	0.472	0.745	0.621	0.606	0.655	0.548	0.544	0.499	0.601	0.364	0.547	0.497	0.551	0.568	0.682	0.529		49.5	0.965	0.963	0.978	0.986	0.988	1.013	0.917	0.908	0.941
49.75	0.398	0.382	0.331	0.368	0.368	0.378	0.407	0.419	0.369	0.483	0.435	0.444	0.263	0.385	0.34	0.496	0.494	0.488		49.75	0.544	0.492	0.473	0.745	0.623	0.606	0.656	0.549	0.545	0.5	0.604	0.363	0.547	0.499	0.55	0.569	0.682	0.529		49.75	0.972	0.968	0.98	0.991	0.995	1.019	0.927	0.918	0.942
50	0.398	0.382	0.332	0.369	0.369	0.379	0.409	0.42	0.371	0.484	0.435	0.444	0.264	0.387	0.34	0.496	0.494	0.486		50	0.545	0.493	0.471	0.744	0.623	0.604	0.655	0.547	0.544	0.499	0.601	0.363	0.548	0.5	0.548	0.57	0.681	0.531		50	0.966	0.959	0.973	0.988	0.989	1.013	0.919	0.91	0.936
50.25	0.399	0.383	0.331	0.369	0.369	0.38	0.409	0.42	0.371	0.485	0.435	0.444	0.265	0.381	0.34	0.495	0.494	0.487		50.25	0.544	0.493	0.47	0.745	0.624	0.604	0.655	0.546	0.542	0.5	0.598	0.363	0.55	0.502	0.548	0.569	0.673	0.529		50.25	0.963	0.956	0.976	0.986	0.987	1.009	0.921	0.905	0.939
50.5	0.399	0.383	0.332	0.369	0.369	0.379	0.41	0.421	0.372	0.484	0.436	0.444	0.264	0.384	0.34	0.495	0.493	0.487		50.5	0.545	0.491	0.468	0.741	0.622	0.602	0.654	0.545	0.54	0.498	0.6	0.361	0.549	0.502	0.546	0.568	0.674	0.529		50.5	0.973	0.97	0.98	0.997	0.999	1.022	0.93	0.917	0.945
50.75	0.399	0.382	0.332	0.371	0.37	0.38	0.412	0.423	0.373	0.484	0.435	0.444	0.264	0.38	0.34	0.495	0.493	0.486		50.75	0.543	0.492	0.467	0.74	0.623	0.599	0.652	0.543	0.539	0.496	0.597	0.36	0.548	0.504	0.544	0.568	0.672	0.527		50.75	0.966	0.959	0.98	0.991	0.99	1.011	0.925	0.905	0.937
51	0.4	0.383	0.333	0.371	0.37	0.38	0.412	0.423	0.373	0.485	0.435	0.445	0.263	0.38	0.339	0.495	0.493	0.487		51	0.543	0.491	0.465	0.737	0.622	0.598	0.651	0.541	0.537	0.495	0.594	0.358	0.547	0.505	0.543	0.567	0.667	0.526		51	0.936	0.933	0.947	0.968	0.964	0.996	0.909	0.885	0.928
51.25	0.399	0.383	0.333	0.373	0.372	0.381	0.415	0.425	0.375	0.485	0.436	0.445	0.263	0.382	0.34	0.495	0.493	0.486		51.25	0.542	0.494	0.465	0.736	0.623	0.596	0.649	0.539	0.535	0.495	0.595	0.357	0.547	0.505	0.542	0.568	0.663	0.526		51.25	0.949	0.946	0.958	0.977	0.975	1.009	0.914	0.899	0.936
51.5	0.4	0.385	0.334	0.372	0.372	0.381	0.414	0.425	0.375	0.485	0.437	0.446	0.263	0.385	0.34	0.495	0.492	0.486		51.5	0.543	0.494	0.465	0.734	0.623	0.594	0.648	0.537	0.534	0.495	0.594	0.356	0.547	0.507	0.541	0.568	0.662	0.526		51.5	0.942	0.938	0.954	0.974	0.97	1.003	0.911	0.893	0.933
51.75	0.4	0.385	0.334	0.374	0.373	0.382	0.416	0.426	0.376	0.486	0.438	0.446	0.263	0.39	0.34	0.498	0.495	0.487		51.75	0.542	0.493	0.463	0.733	0.623	0.594	0.647	0.536	0.531	0.495	0.592	0.355	0.546	0.506	0.539	0.567	0.656	0.526		51.75	0.934	0.929	0.948	0.965	0.962	0.998	0.907	0.886	0.929
52	0.398	0.384	0.333	0.372	0.371	0.38	0.415	0.425	0.376	0.485	0.436	0.445	0.263	0.388	0.339	0.493	0.49	0.482		52	0.542	0.492	0.462	0.731	0.623	0.592	0.645	0.535	0.531	0.494	0.588	0.355	0.546	0.508	0.539	0.566	0.654	0.525		52	0.946	0.935	0.956	0.974	0.968	1.007	0.914	0.895	0.933
52.25	0.4	0.386	0.334	0.373	0.372	0.381	0.415	0.426	0.377	0.485	0.437	0.444	0.264	0.391	0.34	0.495	0.493	0.485		52.25	0.543	0.493	0.462	0.731	0.625	0.592	0.644	0.533	0.529	0.495	0.587	0.355	0.547	0.509	0.537	0.566	0.653	0.524		52.25	0.958	0.95	0.971	0.99	0.987	1.024	0.924	0.911	0.948
52.5	0.399	0.386	0.333	0.373	0.371	0.381	0.416	0.425	0.377	0.484	0.437	0.445	0.264	0.389	0.34	0.494	0.492	0.484		52.5	0.542	0.494	0.461	0.73	0.624	0.592	0.642	0.532	0.528	0.493	0.587	0.353	0.547	0.51	0.537	0.565	0.65	0.524		52.5	0.959	0.948	0.979	0.994	0.989	1.025	0.928	0.907	0.948
52.75	0.4	0.387	0.333	0.374	0.373	0.381	0.419	0.428	0.379	0.484	0.438	0.446	0.264	0.396	0.34	0.495	0.491	0.486		52.75	0.542	0.497	0.46	0.727	0.625	0.59	0.642	0.532	0.527	0.494	0.585	0.352	0.548	0.512	0.535	0.563	0.645	0.524		52.75	0.969	0.958	0.978	0.998	0.998	1.027	0.927	0.916	0.948
53	0.398	0.386	0.332	0.373	0.372	0.38	0.418	0.427	0.379	0.483	0.438	0.446	0.264	0.391	0.34	0.495	0.492	0.484		53	0.543	0.497	0.461	0.725	0.623	0.588	0.641	0.53	0.525	0.493	0.587	0.351	0.548	0.514	0.535	0.562	0.643	0.522		53	0.955	0.942	0.961	0.982	0.978	1.016	0.92	0.901	0.942
53.25	0.399	0.387	0.332	0.373	0.372	0.381	0.418	0.427	0.379	0.485	0.437	0.445	0.264	0.385	0.34	0.493	0.49	0.482		53.25	0.541	0.495	0.457	0.723	0.623	0.586	0.639	0.528	0.524	0.492	0.58	0.351	0.546	0.513	0.531	0.563	0.637	0.523		53.25	0.941	0.93	0.948	0.971	0.966	1.003	0.912	0.895	0.929
53.5	0.399	0.387	0.333	0.374	0.372	0.381	0.418	0.428	0.38	0.484	0.437	0.446	0.264	0.384	0.34	0.493	0.49	0.482		53.5	0.54	0.496	0.456	0.72	0.622	0.585	0.637	0.527	0.523	0.49	0.579	0.35	0.546	0.514	0.531	0.561	0.634	0.522		53.5	0.952	0.936	0.961	0.979	0.973	1.011	0.918	0.897	0.935
53.75	0.398	0.387	0.331	0.375	0.373	0.381	0.42	0.429	0.381	0.484	0.439	0.447	0.263	0.387	0.339	0.494	0.491	0.482		53.75	0.539	0.496	0.454	0.72	0.622	0.584	0.636	0.526	0.522	0.49	0.578	0.349	0.546	0.515	0.53	0.56	0.634	0.52		53.75	0.954	0.941	0.964	0.983	0.975	1.012	0.921	0.897	0.937
54	0.399	0.389	0.333	0.375	0.373	0.382	0.421	0.43	0.381	0.485	0.438	0.446	0.264	0.386	0.339	0.494	0.49	0.481		54	0.539	0.497	0.453	0.717	0.621	0.582	0.634	0.525	0.52	0.488	0.574	0.349	0.546	0.515	0.528	0.559	0.63	0.52		54	0.938	0.931	0.95	0.974	0.966	1.005	0.914	0.888	0.931
54.25	0.399	0.389	0.332	0.375	0.373	0.381	0.421	0.429	0.381	0.485	0.438	0.447	0.263	0.384	0.339	0.492	0.489	0.48		54.25	0.539	0.497	0.452	0.716	0.622	0.582	0.633	0.523	0.519	0.488	0.576	0.348	0.546	0.516	0.527	0.559	0.624	0.521		54.25	0.935	0.928	0.954	0.976	0.968	1.007	0.914	0.893	0.932
54.5	0.398	0.388	0.332	0.375	0.373	0.381	0.421	0.43	0.382	0.485	0.439	0.446	0.263	0.383	0.338	0.492	0.489	0.479		54.5	0.537	0.497	0.45	0.714	0.621	0.58	0.631	0.522	0.518	0.486	0.574	0.346	0.544	0.516	0.525	0.557	0.624	0.519		54.5	0.938	0.931	0.953	0.981	0.968	1.014	0.915	0.893	0.937
54.75	0.399	0.389	0.331	0.376	0.374	0.381	0.423	0.431	0.383	0.484	0.438	0.446	0.263	0.386	0.339	0.492	0.488	0.478		54.75	0.537	0.498	0.45	0.712	0.621	0.579	0.63	0.522	0.517	0.485	0.574	0.345	0.544	0.518	0.524	0.557	0.62	0.518		54.75	0.941	0.93	0.952	0.976	0.964	1.011	0.913	0.894	0.936
55	0.398	0.388	0.329	0.377	0.375	0.381	0.425	0.433	0.385	0.484	0.44	0.447	0.263	0.397	0.338	0.492	0.488	0.478		55	0.537	0.498	0.448	0.71	0.62	0.579	0.629	0.52	0.517	0.485	0.574	0.346	0.544	0.518	0.524	0.558	0.617	0.519		55	0.931	0.923	0.941	0.966	0.955	1.007	0.909	0.885	0.931
55.25	0.399	0.389	0.33	0.376	0.375	0.381	0.425	0.433	0.386	0.484	0.439	0.448	0.263	0.392	0.339	0.492	0.488	0.478		55.25	0.536	0.498	0.447	0.708	0.62	0.576	0.628	0.519	0.514	0.484	0.572	0.344	0.543	0.518	0.522	0.557	0.616	0.517		55.25	0.949	0.937	0.962	0.98	0.972	1.018	0.922	0.898	0.936
55.5	0.399	0.389	0.331	0.376	0.374	0.382	0.425	0.434	0.386	0.485	0.439	0.448	0.264	0.388	0.339	0.492	0.489	0.479		55.5	0.536	0.501	0.447	0.708	0.621	0.578	0.627	0.519	0.515	0.484	0.568	0.345	0.544	0.52	0.52	0.555	0.608	0.518		55.5	0.958	0.946	0.971	0.989	0.982	1.024	0.927	0.905	0.939
55.75	0.398	0.39	0.331	0.378	0.376	0.383	0.427	0.435	0.387	0.486	0.439	0.448	0.263	0.387	0.338	0.491	0.488	0.478		55.75	0.534	0.501	0.445	0.705	0.621	0.576	0.626	0.517	0.513	0.483	0.567	0.344	0.544	0.521	0.519	0.556	0.608	0.517		55.75	0.946	0.934	0.955	0.98	0.971	1.018	0.919	0.895	0.935
56	0.399	0.391	0.332	0.378	0.376	0.383	0.427	0.435	0.387	0.486	0.439	0.448	0.263	0.39	0.338	0.491	0.487	0.478		56	0.534	0.502	0.443	0.702	0.62	0.573	0.624	0.516	0.512	0.481	0.567	0.343	0.542	0.522	0.518	0.556	0.604	0.517		56	0.952	0.937	0.964	0.984	0.976	1.021	0.922	0.901	0.94
56.25	0.399	0.39	0.331	0.379	0.378	0.384	0.429	0.436	0.389	0.486	0.44	0.449	0.263	0.392	0.339	0.492	0.488	0.479		56.25	0.534	0.503	0.443	0.701	0.62	0.573	0.622	0.515	0.511	0.481	0.568	0.341	0.542	0.523	0.517	0.556	0.604	0.515		56.25	0.943	0.932	0.956	0.979	0.968	1.018	0.918	0.893	0.936
56.5	0.399	0.39	0.331	0.379	0.377	0.384	0.428	0.436	0.389	0.487	0.44	0.448	0.263	0.387	0.339	0.49	0.487	0.477		56.5	0.534	0.504	0.442	0.7	0.621	0.572	0.62	0.514	0.51	0.48	0.568	0.342	0.542	0.524	0.516	0.556	0.6	0.516		56.5	0.949	0.94	0.961	0.987	0.977	1.028	0.926	0.902	0.941
56.75	0.397	0.39	0.33	0.384	0.382	0.385	0.433	0.439	0.391	0.487	0.441	0.45	0.263	0.395	0.339	0.492	0.488	0.478		56.75	0.533	0.505	0.441	0.699	0.621	0.572	0.619	0.514	0.509	0.48	0.57	0.341	0.542	0.524	0.514	0.555	0.6	0.515		56.75	0.929	0.92	0.944	0.967	0.957	1.008	0.908	0.888	0.929
57	0.398	0.391	0.331	0.383	0.381	0.385	0.433	0.44	0.391	0.487	0.441	0.449	0.263	0.391	0.339	0.491	0.487	0.476		57	0.533	0.506	0.44	0.695	0.619	0.569	0.618	0.513	0.509	0.479	0.569	0.34	0.541	0.525	0.513	0.554	0.597	0.517		57	0.946	0.932	0.967	0.982	0.971	1.02	0.923	0.895	0.935
57.25	0.398	0.388	0.33	0.387	0.385	0.385	0.438	0.443	0.393	0.486	0.441	0.45	0.263	0.408	0.34	0.492	0.486	0.478		57.25	0.533	0.506	0.44	0.695	0.619	0.569	0.617	0.512	0.508	0.48	0.568	0.341	0.542	0.526	0.513	0.556	0.597	0.516		57.25	0.948	0.936	0.961	0.984	0.976	1.024	0.918	0.9	0.937
57.5	0.397	0.391	0.332	0.383	0.381	0.386	0.433	0.44	0.393	0.487	0.441	0.45	0.264	0.397	0.341	0.491	0.488	0.479		57.5	0.533	0.506	0.44	0.693	0.619	0.569	0.617	0.512	0.508	0.479	0.566	0.34	0.542	0.527	0.512	0.554	0.594	0.516		57.5	0.936	0.925	0.95	0.975	0.965	1.019	0.913	0.894	0.931
57.75	0.397	0.391	0.332	0.381	0.38	0.383	0.434	0.44	0.393	0.484	0.441	0.45	0.263	0.398	0.339	0.491	0.487	0.476		57.75	0.535	0.501	0.44	0.692	0.618	0.569	0.616	0.511	0.507	0.481	0.567	0.34	0.543	0.528	0.513	0.554	0.592	0.517		57.75	0.936	0.924	0.951	0.975	0.967	1.022	0.908	0.896	0.932
58	0.398	0.392	0.333	0.382	0.38	0.384	0.435	0.442	0.395	0.486	0.442	0.45	0.264	0.4	0.34	0.492	0.488	0.478		58	0.533	0.502	0.438	0.691	0.619	0.569	0.616	0.51	0.507	0.481	0.562	0.34	0.542	0.528	0.51	0.554	0.593	0.515		58	0.936	0.92	0.947	0.972	0.964	1.021	0.906	0.888	0.932
58.25	0.398	0.392	0.332	0.382	0.38	0.384	0.436	0.442	0.395	0.486	0.442	0.451	0.264	0.412	0.34	0.49	0.486	0.477		58.25	0.533	0.504	0.437	0.689	0.618	0.568	0.615	0.509	0.506	0.479	0.56	0.339	0.542	0.529	0.509	0.552	0.59	0.515		58.25	0.917	0.904	0.931	0.957	0.948	1.005	0.893	0.877	0.918
58.5	0.398	0.392	0.332	0.382	0.379	0.385	0.435	0.441	0.395	0.486	0.442	0.451	0.263	0.397	0.339	0.49	0.486	0.477		58.5	0.53	0.503	0.434	0.686	0.618	0.566	0.613	0.508	0.505	0.477	0.559	0.338	0.54	0.53	0.508	0.552	0.589	0.515		58.5	0.915	0.9	0.93	0.952	0.943	1.003	0.888	0.878	0.917
58.75	0.397	0.392	0.332	0.383	0.38	0.386	0.436	0.442	0.396	0.487	0.442	0.451	0.264	0.395	0.34	0.491	0.487	0.476		58.75	0.529	0.504	0.433	0.685	0.618	0.564	0.612	0.508	0.505	0.476	0.559	0.337	0.541	0.531	0.507	0.552	0.587	0.515		58.75	0.935	0.921	0.947	0.97	0.964	1.019	0.906	0.89	0.928
59	0.398	0.393	0.333	0.383	0.381	0.386	0.436	0.442	0.396	0.487	0.442	0.451	0.263	0.397	0.34	0.49	0.485	0.477		59	0.529	0.505	0.432	0.684	0.617	0.564	0.61	0.507	0.504	0.476	0.558	0.337	0.54	0.532	0.506	0.55	0.586	0.513		59	0.941	0.926	0.954	0.979	0.971	1.026	0.911	0.895	0.934
59.25	0.397	0.393	0.332	0.385	0.382	0.387	0.438	0.444	0.398	0.487	0.442	0.451	0.263	0.397	0.34	0.491	0.487	0.477		59.25	0.528	0.505	0.431	0.682	0.618	0.563	0.609	0.506	0.502	0.476	0.558	0.337	0.54	0.533	0.504	0.553	0.585	0.512		59.25	0.936	0.923	0.95	0.975	0.966	1.021	0.912	0.894	0.935
59.5	0.397	0.393	0.331	0.382	0.38	0.385	0.436	0.443	0.396	0.487	0.442	0.45	0.263	0.39	0.338	0.488	0.484	0.473		59.5	0.527	0.505	0.43	0.68	0.616	0.562	0.607	0.505	0.503	0.475	0.554	0.336	0.539	0.533	0.503	0.552	0.583	0.514		59.5	0.944	0.931	0.957	0.982	0.975	1.032	0.914	0.901	0.94
59.75	0.398	0.393	0.332	0.387	0.386	0.387	0.441	0.447	0.4	0.487	0.444	0.451	0.263	0.401	0.34	0.49	0.486	0.474		59.75	0.528	0.507	0.43	0.679	0.618	0.561	0.607	0.505	0.502	0.476	0.556	0.337	0.54	0.535	0.503	0.552	0.583	0.513		59.75	0.914	0.902	0.929	0.954	0.944	1.008	0.891	0.879	0.927
60	0.397	0.393	0.331	0.385	0.383	0.386	0.441	0.447	0.4	0.486	0.443	0.452	0.265	0.402	0.34	0.49	0.487	0.477		60	0.528	0.507	0.429	0.677	0.619	0.561	0.606	0.505	0.502	0.475	0.553	0.335	0.54	0.537	0.504	0.549	0.582	0.514		60	0.921	0.902	0.936	0.96	0.952	1.017	0.901	0.889	0.928
60.25	0.398	0.393	0.332	0.387	0.385	0.387	0.442	0.447	0.401	0.488	0.443	0.452	0.264	0.399	0.341	0.489	0.485	0.477		60.25	0.526	0.506	0.427	0.676	0.618	0.559	0.605	0.504	0.501	0.475	0.55	0.334	0.539	0.537	0.502	0.551	0.579	0.512		60.25	0.941	0.921	0.954	0.979	0.974	1.037	0.913	0.902	0.94
60.5	0.398	0.393	0.332	0.391	0.39	0.388	0.446	0.45	0.403	0.488	0.446	0.453	0.265	0.418	0.341	0.49	0.486	0.478		60.5	0.527	0.509	0.428	0.675	0.618	0.56	0.605	0.503	0.501	0.474	0.552	0.335	0.54	0.538	0.501	0.548	0.578	0.513		60.5	0.932	0.915	0.948	0.974	0.967	1.029	0.906	0.896	0.935
60.75	0.398	0.393	0.332	0.388	0.386	0.387	0.443	0.449	0.403	0.487	0.445	0.452	0.264	0.42	0.341	0.49	0.485	0.477		60.75	0.526	0.509	0.427	0.672	0.616	0.558	0.604	0.503	0.501	0.473	0.551	0.334	0.54	0.538	0.5	0.546	0.577	0.512		60.75	0.941	0.92	0.96	0.977	0.973	1.032	0.911	0.903	0.938
61	0.397	0.393	0.331	0.387	0.385	0.388	0.443	0.448	0.403	0.487	0.444	0.453	0.264	0.408	0.34	0.49	0.485	0.476		61	0.524	0.509	0.424	0.671	0.616	0.558	0.602	0.501	0.5	0.472	0.549	0.333	0.538	0.538	0.499	0.548	0.578	0.51		61	0.935	0.916	0.95	0.976	0.969	1.03	0.908	0.897	0.931
61.25	0.398	0.393	0.332	0.389	0.386	0.388	0.445	0.449	0.404	0.489	0.444	0.453	0.265	0.408	0.34	0.49	0.485	0.476		61.25	0.523	0.51	0.423	0.669	0.616	0.556	0.601	0.501	0.499	0.471	0.551	0.332	0.538	0.54	0.498	0.546	0.575	0.51		61.25	0.919	0.908	0.937	0.962	0.953	1.02	0.902	0.885	0.926
61.5	0.397	0.394	0.332	0.391	0.39	0.39	0.447	0.452	0.406	0.489	0.445	0.453	0.264	0.413	0.341	0.491	0.487	0.477		61.5	0.523	0.511	0.423	0.668	0.616	0.555	0.6	0.501	0.498	0.47	0.552	0.331	0.537	0.54	0.498	0.548	0.578	0.51		61.5	0.924	0.912	0.942	0.966	0.959	1.028	0.907	0.888	0.932
61.75	0.397	0.393	0.332	0.389	0.386	0.388	0.445	0.45	0.405	0.489	0.444	0.453	0.264	0.405	0.34	0.488	0.483	0.474		61.75	0.522	0.51	0.422	0.667	0.614	0.555	0.598	0.5	0.497	0.469	0.549	0.33	0.537	0.54	0.497	0.547	0.575	0.509		61.75	0.922	0.911	0.942	0.964	0.958	1.024	0.908	0.891	0.93
62	0.398	0.394	0.333	0.398	0.396	0.391	0.454	0.458	0.408	0.489	0.446	0.455	0.264	0.414	0.34	0.489	0.485	0.477		62	0.521	0.511	0.421	0.665	0.615	0.555	0.598	0.499	0.497	0.469	0.549	0.332	0.537	0.541	0.495	0.545	0.575	0.509		62	0.909	0.901	0.933	0.957	0.95	1.016	0.899	0.879	0.921
62.25	0.397	0.394	0.332	0.396	0.394	0.39	0.452	0.454	0.408	0.489	0.447	0.454	0.264	0.421	0.341	0.489	0.485	0.475		62.25	0.521	0.513	0.421	0.663	0.613	0.553	0.596	0.499	0.496	0.468	0.55	0.332	0.536	0.54	0.494	0.544	0.576	0.509		62.25	0.911	0.905	0.939	0.962	0.954	1.021	0.904	0.885	0.928
62.5	0.397	0.393	0.332	0.39	0.387	0.388	0.448	0.452	0.407	0.488	0.445	0.454	0.264	0.407	0.34	0.488	0.482	0.472		62.5	0.521	0.512	0.42	0.663	0.613	0.552	0.596	0.498	0.496	0.468	0.547	0.33	0.536	0.541	0.495	0.543	0.574	0.509		62.5	0.92	0.909	0.945	0.963	0.953	1.02	0.903	0.884	0.933
62.75	0.397	0.393	0.331	0.399	0.397	0.391	0.455	0.456	0.41	0.489	0.447	0.454	0.265	0.426	0.342	0.489	0.485	0.477		62.75	0.521	0.516	0.42	0.662	0.612	0.554	0.597	0.502	0.498	0.475	0.539	0.332	0.537	0.543	0.495	0.543	0.574	0.51		62.75	0.915	0.905	0.941	0.962	0.954	1.024	0.907	0.883	0.934
63	0.398	0.395	0.332	0.393	0.391	0.391	0.45	0.454	0.41	0.49	0.446	0.455	0.265	0.413	0.341	0.489	0.485	0.474		63	0.52	0.514	0.418	0.661	0.611	0.554	0.596	0.502	0.498	0.475	0.537	0.331	0.536	0.542	0.494	0.542	0.573	0.508		63	0.914	0.908	0.946	0.962	0.953	1.026	0.902	0.887	0.941
63.25	0.398	0.395	0.332	0.398	0.398	0.392	0.455	0.458	0.412	0.489	0.448	0.455	0.265	0.43	0.342	0.489	0.485	0.477		63.25	0.52	0.519	0.419	0.66	0.611	0.554	0.596	0.5	0.498	0.475	0.541	0.33	0.537	0.544	0.495	0.54	0.573	0.508		63.25	0.916	0.905	0.942	0.963	0.953	1.026	0.904	0.892	0.931
63.5	0.397	0.395	0.332	0.4	0.399	0.393	0.456	0.459	0.413	0.49	0.448	0.455	0.265	0.421	0.342	0.49	0.485	0.478		63.5	0.518	0.518	0.417	0.657	0.609	0.553	0.594	0.499	0.497	0.474	0.541	0.33	0.536	0.544	0.493	0.541	0.573	0.509		63.5	0.917	0.905	0.942	0.964	0.956	1.025	0.905	0.891	0.928
63.75	0.398	0.396	0.333	0.397	0.396	0.393	0.454	0.457	0.412	0.49	0.448	0.456	0.264	0.419	0.341	0.49	0.485	0.475		63.75	0.518	0.518	0.415	0.657	0.609	0.552	0.593	0.499	0.496	0.474	0.541	0.33	0.536	0.543	0.492	0.542	0.572	0.508		63.75	0.905	0.895	0.934	0.955	0.944	1.016	0.891	0.884	0.924
64	0.398	0.396	0.332	0.396	0.394	0.392	0.453	0.456	0.413	0.489	0.448	0.455	0.264	0.413	0.341	0.489	0.484	0.473		64	0.518	0.519	0.415	0.656	0.607	0.552	0.592	0.499	0.496	0.473	0.541	0.329	0.536	0.543	0.492	0.542	0.571	0.508		64	0.922	0.908	0.947	0.967	0.957	1.033	0.906	0.896	0.932
64.25	0.397	0.396	0.333	0.397	0.395	0.392	0.454	0.456	0.413	0.49	0.447	0.456	0.264	0.412	0.341	0.488	0.483	0.472		64.25	0.517	0.52	0.414	0.654	0.607	0.551	0.592	0.499	0.495	0.472	0.54	0.327	0.535	0.543	0.491	0.54	0.572	0.505		64.25	0.925	0.913	0.954	0.971	0.96	1.037	0.907	0.893	0.937
64.5	0.397	0.397	0.333	0.403	0.402	0.393	0.461	0.462	0.416	0.489	0.449	0.457	0.264	0.419	0.341	0.49	0.484	0.473		64.5	0.516	0.521	0.413	0.653	0.608	0.55	0.59	0.498	0.494	0.471	0.541	0.327	0.535	0.543	0.49	0.541	0.572	0.506		64.5	0.937	0.925	0.961	0.984	0.975	1.048	0.92	0.905	0.945
64.75	0.396	0.396	0.332	0.402	0.4	0.392	0.46	0.461	0.416	0.489	0.449	0.457	0.264	0.426	0.341	0.489	0.483	0.472		64.75	0.516	0.52	0.413	0.651	0.607	0.549	0.589	0.497	0.494	0.471	0.541	0.328	0.535	0.544	0.49	0.541	0.572	0.506		64.75	0.925	0.908	0.949	0.973	0.959	1.036	0.91	0.891	0.937
65	0.397	0.396	0.333	0.402	0.402	0.392	0.459	0.457	0.416	0.488	0.449	0.455	0.264	0.426	0.341	0.489	0.484	0.472		65	0.514	0.518	0.411	0.65	0.605	0.548	0.588	0.495	0.493	0.468	0.539	0.327	0.533	0.544	0.489	0.539	0.577	0.504		65	0.917	0.905	0.939	0.966	0.955	1.03	0.907	0.89	0.93
65.25	0.397	0.396	0.333	0.404	0.405	0.393	0.461	0.459	0.418	0.489	0.45	0.456	0.265	0.439	0.342	0.489	0.484	0.475		65.25	0.515	0.516	0.411	0.65	0.604	0.549	0.587	0.496	0.492	0.469	0.541	0.328	0.533	0.544	0.487	0.541	0.574	0.505		65.25	0.941	0.932	0.968	0.99	0.982	1.055	0.923	0.918	0.945
65.5	0.398	0.397	0.333	0.403	0.405	0.394	0.459	0.458	0.418	0.49	0.449	0.455	0.265	0.428	0.342	0.489	0.484	0.472		65.5	0.513	0.516	0.41	0.648	0.604	0.547	0.586	0.495	0.491	0.468	0.538	0.325	0.533	0.543	0.485	0.54	0.575	0.503		65.5	0.936	0.915	0.957	0.983	0.976	1.043	0.921	0.909	0.944
65.75	0.396	0.397	0.333	0.408	0.411	0.395	0.463	0.461	0.42	0.49	0.451	0.457	0.265	0.438	0.342	0.489	0.485	0.473		65.75	0.513	0.52	0.409	0.646	0.603	0.546	0.585	0.495	0.491	0.467	0.54	0.326	0.532	0.544	0.485	0.538	0.572	0.506		65.75	0.922	0.906	0.946	0.97	0.961	1.035	0.905	0.896	0.93
66	0.396	0.396	0.333	0.408	0.408	0.395	0.463	0.461	0.42	0.49	0.451	0.457	0.264	0.434	0.342	0.49	0.486	0.473		66	0.512	0.519	0.408	0.646	0.603	0.546	0.584	0.494	0.491	0.467	0.54	0.326	0.532	0.544	0.484	0.538	0.573	0.504		66	0.907	0.895	0.934	0.953	0.945	1.019	0.886	0.884	0.92
66.25	0.396	0.397	0.333	0.402	0.402	0.394	0.46	0.46	0.419	0.49	0.45	0.456	0.264	0.426	0.341	0.488	0.483	0.471		66.25	0.511	0.519	0.407	0.645	0.602	0.545	0.583	0.493	0.491	0.467	0.539	0.325	0.531	0.544	0.484	0.538	0.572	0.505		66.25	0.903	0.889	0.929	0.951	0.942	1.018	0.88	0.879	0.916
66.5	0.396	0.397	0.334	0.405	0.407	0.395	0.463	0.462	0.422	0.49	0.45	0.457	0.265	0.43	0.342	0.489	0.485	0.471		66.5	0.511	0.519	0.406	0.644	0.602	0.544	0.583	0.493	0.49	0.466	0.538	0.324	0.532	0.544	0.483	0.538	0.571	0.504		66.5	0.916	0.907	0.949	0.966	0.954	1.033	0.893	0.889	0.927
66.75	0.397	0.397	0.334	0.403	0.405	0.395	0.462	0.463	0.422	0.491	0.451	0.459	0.265	0.425	0.342	0.488	0.484	0.471		66.75	0.51	0.521	0.406	0.642	0.601	0.543	0.581	0.492	0.489	0.465	0.539	0.325	0.531	0.544	0.483	0.537	0.571	0.505		66.75	0.908	0.894	0.935	0.956	0.946	1.025	0.89	0.884	0.921
67	0.397	0.397	0.334	0.409	0.411	0.396	0.466	0.465	0.422	0.491	0.452	0.459	0.265	0.429	0.342	0.488	0.483	0.47		67	0.508	0.522	0.405	0.641	0.602	0.543	0.581	0.492	0.489	0.465	0.538	0.324	0.531	0.544	0.481	0.536	0.571	0.505		67	0.915	0.893	0.937	0.961	0.95	1.027	0.891	0.886	0.921
67.25	0.397	0.397	0.334	0.41	0.413	0.397	0.467	0.467	0.425	0.491	0.452	0.46	0.264	0.426	0.342	0.489	0.484	0.469		67.25	0.508	0.523	0.404	0.639	0.601	0.542	0.58	0.491	0.489	0.464	0.538	0.323	0.53	0.544	0.48	0.535	0.572	0.502		67.25	0.919	0.902	0.945	0.966	0.957	1.034	0.893	0.891	0.923
67.5	0.395	0.396	0.333	0.413	0.416	0.394	0.47	0.467	0.424	0.489	0.453	0.458	0.264	0.434	0.341	0.487	0.483	0.468		67.5	0.509	0.52	0.404	0.639	0.6	0.542	0.579	0.491	0.488	0.464	0.538	0.324	0.53	0.543	0.481	0.535	0.572	0.503		67.5	0.924	0.903	0.943	0.973	0.964	1.042	0.898	0.899	0.925
67.75	0.396	0.396	0.333	0.412	0.415	0.396	0.469	0.465	0.424	0.49	0.452	0.459	0.265	0.429	0.341	0.487	0.481	0.47		67.75	0.506	0.522	0.402	0.638	0.601	0.541	0.578	0.489	0.489	0.463	0.533	0.322	0.529	0.543	0.48	0.535	0.57	0.504		67.75	0.931	0.916	0.956	0.98	0.971	1.046	0.906	0.91	0.931
68	0.395	0.395	0.336	0.406	0.407	0.396	0.466	0.464	0.426	0.49	0.451	0.458	0.265	0.419	0.342	0.486	0.482	0.47		68	0.506	0.525	0.402	0.636	0.601	0.54	0.578	0.49	0.489	0.463	0.53	0.321	0.529	0.544	0.479	0.532	0.568	0.502		68	0.932	0.913	0.959	0.977	0.97	1.043	0.902	0.904	0.931
68.25	0.396	0.397	0.337	0.418	0.421	0.397	0.474	0.468	0.427	0.49	0.454	0.46	0.264	0.438	0.342	0.486	0.482	0.471		68.25	0.506	0.524	0.402	0.636	0.6	0.54	0.577	0.49	0.488	0.463	0.53	0.322	0.529	0.544	0.479	0.531	0.569	0.5		68.25	0.902	0.884	0.926	0.947	0.936	1.013	0.88	0.876	0.909
68.5	0.397	0.398	0.338	0.42	0.423	0.399	0.476	0.47	0.429	0.493	0.454	0.461	0.265	0.432	0.343	0.488	0.483	0.472		68.5	0.503	0.524	0.399	0.633	0.6	0.539	0.576	0.489	0.488	0.461	0.529	0.322	0.528	0.544	0.477	0.533	0.569	0.5		68.5	0.918	0.899	0.944	0.966	0.96	1.037	0.893	0.894	0.918
68.75	0.396	0.398	0.337	0.41	0.412	0.398	0.469	0.466	0.428	0.492	0.452	0.46	0.265	0.42	0.342	0.486	0.481	0.469		68.75	0.503	0.524	0.399	0.633	0.599	0.538	0.575	0.489	0.487	0.461	0.528	0.322	0.528	0.543	0.476	0.533	0.567	0.499		68.75	0.911	0.891	0.935	0.96	0.951	1.028	0.884	0.885	0.913
69	0.396	0.398	0.337	0.415	0.418	0.399	0.473	0.469	0.429	0.492	0.453	0.461	0.265	0.423	0.342	0.487	0.481	0.469		69	0.503	0.525	0.399	0.632	0.6	0.537	0.575	0.488	0.487	0.461	0.529	0.321	0.528	0.543	0.475	0.533	0.567	0.499		69	0.925	0.902	0.947	0.973	0.967	1.038	0.895	0.903	0.92
69.25	0.395	0.397	0.336	0.417	0.418	0.398	0.475	0.469	0.43	0.49	0.454	0.459	0.265	0.428	0.342	0.486	0.482	0.469		69.25	0.503	0.524	0.4	0.631	0.599	0.536	0.574	0.488	0.486	0.46	0.529	0.321	0.528	0.544	0.476	0.532	0.567	0.499		69.25	0.918	0.898	0.943	0.967	0.954	1.031	0.892	0.893	0.916
69.5	0.397	0.399	0.337	0.424	0.428	0.398	0.479	0.473	0.432	0.491	0.455	0.461	0.265	0.44	0.342	0.487	0.481	0.468		69.5	0.502	0.522	0.398	0.631	0.599	0.536	0.573	0.487	0.485	0.46	0.526	0.32	0.526	0.543	0.474	0.534	0.566	0.499		69.5	0.905	0.882	0.927	0.954	0.943	1.021	0.887	0.885	0.91
69.75	0.397	0.398	0.337	0.426	0.432	0.399	0.48	0.472	0.432	0.492	0.455	0.461	0.265	0.432	0.342	0.487	0.481	0.468		69.75	0.5	0.522	0.396	0.629	0.599	0.535	0.572	0.487	0.485	0.459	0.526	0.32	0.526	0.543	0.473	0.534	0.565	0.498		69.75	0.908	0.889	0.933	0.955	0.944	1.023	0.886	0.887	0.912
70	0.396	0.398	0.338	0.416	0.42	0.398	0.473	0.469	0.431	0.491	0.455	0.461	0.265	0.424	0.341	0.485	0.48	0.466		70	0.501	0.525	0.397	0.628	0.598	0.535	0.572	0.487	0.485	0.459	0.525	0.32	0.526	0.543	0.473	0.531	0.565	0.499		70	0.908	0.893	0.933	0.959	0.95	1.027	0.893	0.89	0.911
70.25	0.397	0.4	0.338	0.429	0.434	0.4	0.486	0.477	0.434	0.492	0.456	0.46	0.265	0.439	0.343	0.488	0.482	0.469		70.25	0.499	0.524	0.395	0.628	0.599	0.534	0.571	0.486	0.485	0.458	0.525	0.32	0.525	0.544	0.472	0.533	0.565	0.498		70.25	0.909	0.888	0.933	0.959	0.947	1.027	0.886	0.884	0.919
70.5	0.395	0.4	0.338	0.429	0.433	0.401	0.484	0.476	0.435	0.492	0.457	0.461	0.265	0.429	0.343	0.487	0.482	0.47		70.5	0.498	0.528	0.395	0.626	0.6	0.534	0.57	0.486	0.484	0.458	0.523	0.319	0.525	0.545	0.472	0.531	0.563	0.498		70.5	0.919	0.9	0.945	0.971	0.958	1.038	0.894	0.896	0.921
70.75	0.396	0.4	0.338	0.434	0.438	0.401	0.49	0.479	0.436	0.492	0.456	0.46	0.265	0.449	0.343	0.486	0.479	0.469		70.75	0.498	0.529	0.395	0.626	0.599	0.533	0.57	0.485	0.484	0.459	0.524	0.318	0.525	0.545	0.472	0.531	0.561	0.498		70.75	0.919	0.9	0.946	0.969	0.956	1.036	0.897	0.895	0.924
71	0.395	0.4	0.338	0.429	0.436	0.399	0.483	0.473	0.435	0.491	0.456	0.461	0.265	0.437	0.342	0.487	0.48	0.471		71	0.498	0.53	0.395	0.625	0.599	0.533	0.57	0.486	0.484	0.46	0.521	0.319	0.525	0.545	0.472	0.53	0.56	0.496		71	0.901	0.88	0.923	0.953	0.938	1.02	0.884	0.883	0.909
71.25	0.395	0.4	0.338	0.431	0.437	0.4	0.485	0.474	0.436	0.492	0.455	0.461	0.266	0.433	0.343	0.487	0.481	0.47		71.25	0.496	0.529	0.393	0.624	0.598	0.533	0.568	0.485	0.484	0.458	0.52	0.317	0.523	0.545	0.471	0.53	0.561	0.496		71.25	0.909	0.891	0.936	0.961	0.947	1.03	0.891	0.892	0.917
71.5	0.396	0.401	0.338	0.433	0.438	0.402	0.489	0.477	0.437	0.493	0.456	0.462	0.266	0.433	0.343	0.488	0.481	0.47		71.5	0.495	0.529	0.392	0.624	0.598	0.532	0.568	0.484	0.483	0.458	0.52	0.318	0.523	0.544	0.47	0.528	0.56	0.495		71.5	0.908	0.889	0.931	0.959	0.946	1.025	0.892	0.893	0.914
[truncated: 83 more columns]

## Sheet: Fig1_25%
P. putida KT2440																				R. opacus PD630																				S. lignivorans SYK-6
Time (h)	M9 25% Mock APL			RM 25% Mock APL			MM457 25% Mock APL			Wx 25% Mock APL			SD 25% Mock APL			K3 25% Mock APL				Time (h)	M9 25% Mock APL			RM 25% Mock APL			MM457 25% Mock APL			Wx 25% Mock APL			SD 25% Mock APL			K3 25% Mock APL				Time (h)	M9 25% Mock APL			RM 25% Mock APL			MM457 25% Mock APL
0	0.115	0.109	0.11	0.126	0.109	0.115	0.118	0.113	0.111	0.118	0.117	0.11	0.123	0.114	0.107	0.12	0.115	0.111		0	0.099	0.097	0.094	0.1	0.1	0.097	0.102	0.101	0.096	0.102	0.103	0.094	0.1	0.097	0.094	0.098	0.103	0.094		0	0.104	0.102	0.111	0.103	0.101	0.11	0.109	0.109	0.114
0.25	0.115	0.109	0.111	0.129	0.11	0.115	0.12	0.115	0.112	0.121	0.118	0.112	0.125	0.119	0.108	0.118	0.116	0.112		0.25	0.099	0.098	0.095	0.101	0.098	0.097	0.103	0.101	0.097	0.102	0.104	0.094	0.106	0.097	0.094	0.1	0.103	0.096		0.25	0.104	0.102	0.111	0.103	0.101	0.111	0.112	0.111	0.115
0.5	0.119	0.111	0.114	0.131	0.113	0.116	0.122	0.116	0.114	0.122	0.119	0.114	0.126	0.122	0.109	0.12	0.118	0.113		0.5	0.099	0.098	0.097	0.102	0.099	0.097	0.105	0.102	0.098	0.105	0.104	0.096	0.109	0.099	0.095	0.101	0.107	0.097		0.5	0.105	0.102	0.112	0.103	0.102	0.111	0.113	0.112	0.117
0.75	0.119	0.115	0.113	0.133	0.113	0.121	0.123	0.117	0.115	0.126	0.12	0.112	0.127	0.12	0.11	0.12	0.118	0.114		0.75	0.1	0.099	0.096	0.102	0.1	0.098	0.104	0.104	0.099	0.103	0.105	0.096	0.108	0.102	0.096	0.101	0.107	0.098		0.75	0.105	0.102	0.112	0.104	0.102	0.112	0.115	0.114	0.118
1	0.122	0.113	0.115	0.133	0.114	0.12	0.126	0.118	0.117	0.123	0.12	0.112	0.13	0.122	0.111	0.12	0.118	0.115		1	0.1	0.099	0.099	0.101	0.1	0.098	0.104	0.104	0.1	0.104	0.106	0.097	0.102	0.099	0.097	0.102	0.114	0.1		1	0.105	0.102	0.112	0.104	0.102	0.112	0.117	0.112	0.118
1.25	0.128	0.122	0.119	0.137	0.118	0.126	0.128	0.119	0.119	0.127	0.121	0.114	0.134	0.124	0.112	0.121	0.12	0.117		1.25	0.102	0.1	0.097	0.103	0.101	0.099	0.106	0.105	0.101	0.106	0.105	0.098	0.108	0.099	0.096	0.103	0.112	0.099		1.25	0.106	0.103	0.114	0.105	0.103	0.113	0.119	0.115	0.121
1.5	0.128	0.123	0.119	0.138	0.118	0.125	0.129	0.12	0.121	0.125	0.125	0.116	0.13	0.12	0.113	0.122	0.121	0.119		1.5	0.102	0.101	0.098	0.103	0.102	0.1	0.111	0.106	0.101	0.11	0.105	0.098	0.106	0.099	0.096	0.104	0.119	0.103		1.5	0.106	0.104	0.114	0.105	0.104	0.114	0.122	0.117	0.123
1.75	0.132	0.125	0.123	0.142	0.122	0.127	0.129	0.121	0.122	0.121	0.127	0.119	0.131	0.121	0.115	0.126	0.124	0.124		1.75	0.103	0.101	0.102	0.103	0.101	0.102	0.109	0.106	0.102	0.109	0.105	0.108	0.103	0.099	0.098	0.111	0.116	0.111		1.75	0.107	0.104	0.115	0.106	0.105	0.116	0.123	0.119	0.123
2	0.131	0.126	0.125	0.144	0.122	0.129	0.13	0.124	0.125	0.127	0.13	0.118	0.131	0.123	0.116	0.133	0.129	0.126		2	0.103	0.101	0.099	0.105	0.102	0.1	0.108	0.106	0.102	0.106	0.108	0.109	0.103	0.099	0.097	0.115	0.132	0.115		2	0.107	0.104	0.116	0.107	0.105	0.117	0.125	0.12	0.125
2.25	0.136	0.126	0.126	0.148	0.124	0.131	0.132	0.126	0.128	0.131	0.131	0.121	0.135	0.125	0.117	0.135	0.13	0.129		2.25	0.103	0.103	0.1	0.104	0.103	0.101	0.107	0.106	0.102	0.106	0.105	0.101	0.103	0.103	0.097	0.121	0.133	0.116		2.25	0.107	0.105	0.116	0.107	0.106	0.118	0.126	0.121	0.127
2.5	0.14	0.13	0.131	0.154	0.128	0.132	0.133	0.127	0.131	0.134	0.132	0.127	0.133	0.127	0.12	0.136	0.134	0.131		2.5	0.104	0.103	0.1	0.105	0.103	0.102	0.111	0.108	0.103	0.106	0.111	0.102	0.105	0.105	0.098	0.118	0.137	0.118		2.5	0.108	0.105	0.117	0.108	0.107	0.119	0.129	0.123	0.128
2.75	0.141	0.131	0.131	0.158	0.132	0.135	0.137	0.128	0.133	0.135	0.134	0.124	0.137	0.129	0.121	0.135	0.135	0.132		2.75	0.104	0.103	0.101	0.108	0.103	0.102	0.109	0.107	0.103	0.106	0.112	0.109	0.104	0.1	0.098	0.124	0.132	0.12		2.75	0.109	0.106	0.118	0.11	0.108	0.12	0.131	0.128	0.13
3	0.144	0.134	0.135	0.164	0.132	0.136	0.142	0.132	0.135	0.138	0.136	0.128	0.143	0.13	0.122	0.138	0.137	0.144		3	0.105	0.103	0.101	0.108	0.104	0.102	0.111	0.107	0.104	0.11	0.107	0.107	0.113	0.1	0.098	0.125	0.141	0.122		3	0.11	0.107	0.119	0.111	0.109	0.122	0.133	0.129	0.131
3.25	0.148	0.137	0.138	0.169	0.135	0.137	0.143	0.134	0.138	0.142	0.137	0.13	0.149	0.134	0.127	0.144	0.141	0.151		3.25	0.105	0.104	0.104	0.107	0.104	0.104	0.112	0.107	0.104	0.107	0.108	0.11	0.103	0.101	0.098	0.127	0.139	0.123		3.25	0.11	0.107	0.12	0.112	0.11	0.123	0.134	0.132	0.133
3.5	0.152	0.14	0.141	0.174	0.136	0.138	0.141	0.135	0.14	0.143	0.139	0.132	0.143	0.132	0.129	0.145	0.147	0.151		3.5	0.105	0.104	0.102	0.109	0.108	0.103	0.11	0.108	0.104	0.107	0.109	0.104	0.109	0.101	0.099	0.123	0.143	0.124		3.5	0.111	0.108	0.121	0.112	0.111	0.125	0.135	0.133	0.134
3.75	0.155	0.142	0.145	0.18	0.139	0.142	0.144	0.137	0.137	0.146	0.142	0.134	0.143	0.137	0.129	0.147	0.151	0.155		3.75	0.106	0.104	0.103	0.111	0.105	0.104	0.11	0.109	0.105	0.108	0.109	0.102	0.104	0.103	0.098	0.124	0.136	0.125		3.75	0.112	0.108	0.122	0.114	0.113	0.127	0.137	0.134	0.136
4	0.159	0.143	0.147	0.165	0.144	0.143	0.146	0.139	0.14	0.151	0.144	0.136	0.144	0.138	0.132	0.148	0.151	0.154		4	0.107	0.106	0.105	0.107	0.106	0.106	0.111	0.109	0.105	0.108	0.11	0.104	0.104	0.1	0.098	0.124	0.135	0.123		4	0.113	0.109	0.123	0.115	0.114	0.129	0.138	0.136	0.138
4.25	0.161	0.149	0.15	0.181	0.147	0.143	0.147	0.142	0.14	0.155	0.146	0.138	0.155	0.141	0.134	0.152	0.143	0.143		4.25	0.107	0.105	0.104	0.108	0.106	0.105	0.111	0.109	0.107	0.112	0.116	0.112	0.113	0.101	0.098	0.127	0.147	0.124		4.25	0.113	0.11	0.125	0.117	0.115	0.131	0.139	0.137	0.14
4.5	0.164	0.148	0.155	0.193	0.152	0.145	0.148	0.142	0.144	0.169	0.149	0.14	0.158	0.142	0.134	0.153	0.156	0.145		4.5	0.108	0.106	0.105	0.11	0.107	0.107	0.112	0.109	0.107	0.11	0.111	0.108	0.106	0.103	0.1	0.129	0.145	0.128		4.5	0.114	0.111	0.126	0.119	0.117	0.134	0.141	0.138	0.142
4.75	0.166	0.15	0.159	0.199	0.155	0.152	0.15	0.141	0.147	0.189	0.159	0.151	0.158	0.144	0.133	0.157	0.146	0.151		4.75	0.108	0.106	0.106	0.11	0.108	0.109	0.112	0.11	0.107	0.109	0.118	0.118	0.104	0.101	0.099	0.126	0.144	0.129		4.75	0.115	0.112	0.128	0.121	0.118	0.136	0.143	0.139	0.144
5	0.168	0.152	0.163	0.208	0.158	0.162	0.152	0.144	0.143	0.211	0.174	0.166	0.162	0.146	0.137	0.164	0.155	0.152		5	0.109	0.107	0.11	0.111	0.109	0.108	0.113	0.11	0.108	0.111	0.114	0.117	0.104	0.102	0.099	0.127	0.142	0.129		5	0.116	0.113	0.128	0.121	0.12	0.138	0.145	0.141	0.146
5.25	0.17	0.153	0.164	0.224	0.165	0.175	0.153	0.144	0.141	0.238	0.192	0.184	0.158	0.142	0.14	0.178	0.155	0.154		5.25	0.11	0.108	0.108	0.112	0.11	0.11	0.113	0.111	0.109	0.116	0.119	0.109	0.105	0.101	0.099	0.132	0.147	0.13		5.25	0.116	0.113	0.13	0.123	0.121	0.14	0.146	0.142	0.148
5.5	0.179	0.158	0.167	0.25	0.174	0.193	0.154	0.145	0.146	0.275	0.213	0.203	0.165	0.149	0.142	0.2	0.157	0.164		5.5	0.11	0.109	0.115	0.113	0.113	0.115	0.114	0.113	0.11	0.112	0.125	0.129	0.104	0.102	0.099	0.13	0.143	0.131		5.5	0.117	0.114	0.131	0.125	0.123	0.143	0.149	0.144	0.151
5.75	0.19	0.167	0.173	0.278	0.185	0.219	0.155	0.145	0.148	0.312	0.241	0.23	0.172	0.144	0.143	0.217	0.157	0.175		5.75	0.111	0.11	0.11	0.116	0.117	0.115	0.115	0.113	0.111	0.118	0.12	0.113	0.114	0.105	0.099	0.128	0.155	0.132		5.75	0.118	0.115	0.133	0.126	0.124	0.145	0.15	0.146	0.154
6	0.204	0.181	0.186	0.314	0.202	0.253	0.159	0.147	0.15	0.348	0.278	0.264	0.169	0.15	0.145	0.239	0.157	0.193		6	0.112	0.11	0.11	0.114	0.114	0.114	0.116	0.114	0.111	0.115	0.125	0.116	0.108	0.106	0.099	0.133	0.155	0.129		6	0.119	0.116	0.134	0.128	0.127	0.148	0.152	0.148	0.156
6.25	0.221	0.196	0.199	0.35	0.225	0.294	0.163	0.149	0.153	0.367	0.308	0.298	0.176	0.151	0.148	0.269	0.161	0.212		6.25	0.113	0.112	0.115	0.116	0.115	0.114	0.117	0.115	0.113	0.118	0.123	0.12	0.114	0.101	0.099	0.134	0.143	0.133		6.25	0.12	0.117	0.136	0.131	0.128	0.151	0.154	0.149	0.159
6.5	0.244	0.217	0.215	0.396	0.253	0.341	0.168	0.152	0.158	0.447	0.346	0.365	0.183	0.157	0.15	0.298	0.177	0.234		6.5	0.114	0.114	0.112	0.118	0.118	0.119	0.118	0.115	0.114	0.118	0.127	0.123	0.109	0.103	0.099	0.131	0.151	0.131		6.5	0.122	0.118	0.138	0.134	0.131	0.154	0.156	0.151	0.162
6.75	0.271	0.242	0.236	0.438	0.29	0.391	0.172	0.156	0.161	0.555	0.419	0.472	0.185	0.156	0.15	0.335	0.199	0.264		6.75	0.115	0.114	0.117	0.119	0.119	0.118	0.119	0.117	0.117	0.121	0.134	0.132	0.111	0.107	0.099	0.131	0.15	0.132		6.75	0.122	0.119	0.14	0.136	0.132	0.157	0.158	0.153	0.165
7	0.303	0.273	0.263	0.482	0.333	0.445	0.177	0.16	0.167	0.627	0.491	0.537	0.189	0.148	0.153	0.371	0.223	0.294		7	0.116	0.116	0.116	0.121	0.122	0.124	0.12	0.117	0.119	0.123	0.125	0.127	0.11	0.101	0.099	0.131	0.15	0.137		7	0.124	0.121	0.142	0.138	0.135	0.16	0.161	0.155	0.168
7.25	0.337	0.309	0.294	0.531	0.381	0.495	0.184	0.164	0.172	0.685	0.556	0.595	0.192	0.155	0.154	0.408	0.246	0.328		7.25	0.118	0.116	0.122	0.122	0.121	0.131	0.121	0.119	0.117	0.121	0.13	0.143	0.105	0.106	0.099	0.131	0.153	0.138		7.25	0.125	0.122	0.143	0.139	0.133	0.163	0.163	0.157	0.172
7.5	0.373	0.344	0.328	0.575	0.432	0.543	0.192	0.17	0.18	0.755	0.638	0.668	0.197	0.156	0.155	0.447	0.276	0.37		7.5	0.119	0.117	0.12	0.123	0.124	0.124	0.123	0.123	0.119	0.121	0.145	0.147	0.105	0.108	0.099	0.132	0.15	0.135		7.5	0.126	0.123	0.146	0.138	0.136	0.165	0.166	0.16	0.176
7.75	0.409	0.381	0.362	0.619	0.483	0.588	0.202	0.176	0.189	0.809	0.708	0.733	0.202	0.158	0.156	0.489	0.311	0.41		7.75	0.121	0.119	0.12	0.126	0.126	0.126	0.125	0.122	0.123	0.125	0.134	0.138	0.106	0.107	0.099	0.138	0.159	0.137		7.75	0.128	0.125	0.148	0.141	0.14	0.17	0.168	0.163	0.18
8	0.447	0.419	0.397	0.66	0.533	0.625	0.213	0.184	0.199	0.857	0.763	0.785	0.207	0.161	0.158	0.532	0.354	0.452		8	0.122	0.12	0.12	0.128	0.127	0.13	0.126	0.124	0.124	0.129	0.148	0.148	0.104	0.109	0.099	0.134	0.154	0.138		8	0.129	0.126	0.15	0.144	0.142	0.174	0.171	0.165	0.184
8.25	0.485	0.455	0.432	0.689	0.578	0.656	0.227	0.194	0.211	0.905	0.812	0.833	0.213	0.163	0.16	0.572	0.39	0.489		8.25	0.124	0.121	0.121	0.129	0.129	0.136	0.127	0.126	0.123	0.133	0.138	0.144	0.114	0.107	0.099	0.134	0.152	0.142		8.25	0.131	0.128	0.153	0.147	0.144	0.178	0.175	0.169	0.189
8.5	0.525	0.495	0.471	0.721	0.619	0.689	0.244	0.206	0.226	0.949	0.863	0.88	0.22	0.166	0.165	0.614	0.429	0.532		8.5	0.125	0.123	0.123	0.133	0.131	0.132	0.129	0.128	0.128	0.129	0.146	0.142	0.104	0.101	0.099	0.135	0.172	0.143		8.5	0.132	0.129	0.155	0.15	0.147	0.183	0.178	0.171	0.193
8.75	0.559	0.53	0.501	0.743	0.65	0.711	0.261	0.217	0.241	0.998	0.914	0.931	0.222	0.17	0.165	0.66	0.468	0.576		8.75	0.128	0.126	0.133	0.137	0.137	0.138	0.133	0.13	0.127	0.133	0.15	0.146	0.11	0.102	0.099	0.136	0.17	0.163		8.75	0.134	0.131	0.157	0.153	0.15	0.187	0.182	0.175	0.199
9	0.594	0.566	0.539	0.767	0.685	0.736	0.283	0.233	0.26	1.019	0.948	0.963	0.228	0.174	0.169	0.701	0.508	0.616		9	0.13	0.128	0.127	0.138	0.137	0.136	0.134	0.134	0.129	0.136	0.15	0.158	0.107	0.106	0.1	0.136	0.189	0.167		9	0.135	0.132	0.16	0.157	0.155	0.191	0.186	0.177	0.203
9.25	0.627	0.598	0.573	0.789	0.714	0.749	0.306	0.25	0.283	1.051	0.99	0.994	0.235	0.177	0.173	0.75	0.549	0.662		9.25	0.132	0.13	0.134	0.142	0.139	0.139	0.135	0.133	0.132	0.133	0.153	0.158	0.105	0.1	0.1	0.14	0.194	0.159		9.25	0.137	0.134	0.163	0.16	0.158	0.196	0.19	0.181	0.208
9.5	0.661	0.634	0.606	0.801	0.739	0.747	0.315	0.273	0.3	1.066	1.014	1.016	0.244	0.181	0.177	0.787	0.593	0.705		9.5	0.133	0.132	0.132	0.142	0.14	0.139	0.137	0.133	0.135	0.139	0.155	0.151	0.104	0.104	0.1	0.134	0.18	0.166		9.5	0.139	0.135	0.165	0.163	0.161	0.201	0.195	0.185	0.213
9.75	0.689	0.666	0.642	0.802	0.746	0.752	0.323	0.286	0.307	1.087	1.03	1.033	0.252	0.187	0.182	0.825	0.637	0.747		9.75	0.134	0.132	0.132	0.146	0.142	0.141	0.138	0.137	0.139	0.14	0.155	0.156	0.104	0.109	0.1	0.136	0.174	0.171		9.75	0.141	0.138	0.168	0.167	0.164	0.207	0.199	0.188	0.22
10	0.712	0.693	0.673	0.807	0.746	0.763	0.332	0.293	0.317	1.107	1.055	1.061	0.261	0.193	0.187	0.862	0.677	0.786		10	0.137	0.134	0.134	0.154	0.147	0.143	0.139	0.14	0.134	0.145	0.164	0.159	0.106	0.101	0.1	0.136	0.195	0.172		10	0.142	0.139	0.171	0.171	0.168	0.212	0.203	0.192	0.225
10.25	0.727	0.713	0.698	0.815	0.754	0.772	0.343	0.301	0.327	1.113	1.07	1.069	0.271	0.199	0.194	0.893	0.721	0.827		10.25	0.138	0.137	0.137	0.155	0.147	0.145	0.141	0.138	0.137	0.142	0.157	0.163	0.114	0.103	0.1	0.145	0.199	0.174		10.25	0.144	0.141	0.174	0.175	0.172	0.218	0.207	0.196	0.231
10.5	0.734	0.723	0.711	0.817	0.761	0.767	0.353	0.311	0.337	1.128	1.086	1.082	0.281	0.206	0.2	0.919	0.767	0.868		10.5	0.14	0.137	0.141	0.157	0.149	0.15	0.142	0.14	0.147	0.146	0.162	0.158	0.112	0.1	0.1	0.146	0.193	0.174		10.5	0.146	0.143	0.178	0.18	0.176	0.224	0.212	0.201	0.239
10.75	0.749	0.739	0.726	0.818	0.766	0.766	0.364	0.32	0.347	1.134	1.098	1.096	0.292	0.215	0.207	0.945	0.812	0.9		10.75	0.141	0.141	0.146	0.156	0.152	0.151	0.144	0.137	0.15	0.144	0.153	0.156	0.105	0.101	0.1	0.141	0.191	0.177		10.75	0.149	0.145	0.182	0.183	0.18	0.231	0.218	0.206	0.247
11	0.756	0.75	0.737	0.812	0.762	0.76	0.373	0.329	0.356	1.146	1.109	1.109	0.306	0.222	0.214	0.968	0.853	0.92		11	0.143	0.142	0.142	0.156	0.156	0.151	0.145	0.142	0.147	0.148	0.158	0.159	0.105	0.101	0.1	0.148	0.208	0.173		11	0.151	0.147	0.185	0.188	0.185	0.237	0.224	0.21	0.253
11.25	0.759	0.757	0.746	0.805	0.755	0.752	0.383	0.338	0.366	1.17	1.135	1.139	0.32	0.229	0.224	0.992	0.886	0.94		11.25	0.145	0.148	0.142	0.16	0.155	0.163	0.149	0.146	0.146	0.148	0.159	0.165	0.114	0.11	0.1	0.153	0.186	0.18		11.25	0.153	0.149	0.188	0.194	0.19	0.245	0.229	0.215	0.261
11.5	0.762	0.763	0.753	0.799	0.749	0.745	0.392	0.346	0.375	1.193	1.157	1.165	0.335	0.239	0.233	1.006	0.906	0.966		11.5	0.146	0.146	0.148	0.166	0.164	0.154	0.148	0.145	0.147	0.149	0.162	0.165	0.107	0.101	0.1	0.144	0.198	0.183		11.5	0.155	0.152	0.192	0.198	0.196	0.253	0.237	0.222	0.27
11.75	0.756	0.76	0.755	0.795	0.747	0.743	0.402	0.355	0.383	1.185	1.159	1.165	0.351	0.251	0.244	1.015	0.928	0.983		11.75	0.148	0.152	0.149	0.166	0.168	0.162	0.149	0.147	0.155	0.149	0.168	0.164	0.105	0.101	0.1	0.145	0.22	0.184		11.75	0.158	0.155	0.196	0.205	0.202	0.261	0.244	0.228	0.279
12	0.745	0.752	0.741	0.79	0.742	0.738	0.41	0.362	0.392	1.193	1.171	1.175	0.369	0.26	0.255	1.027	0.957	1.006		12	0.151	0.149	0.153	0.175	0.166	0.162	0.155	0.148	0.148	0.152	0.162	0.165	0.106	0.101	0.1	0.155	0.209	0.186		12	0.16	0.157	0.201	0.211	0.207	0.269	0.25	0.234	0.288
12.25	0.745	0.752	0.734	0.789	0.74	0.736	0.42	0.371	0.401	1.196	1.17	1.175	0.388	0.275	0.268	1.035	0.982	1.015		12.25	0.155	0.149	0.153	0.179	0.168	0.165	0.16	0.152	0.156	0.157	0.164	0.163	0.109	0.103	0.1	0.148	0.222	0.191		12.25	0.163	0.159	0.205	0.216	0.213	0.277	0.256	0.239	0.297
12.5	0.739	0.749	0.72	0.787	0.738	0.735	0.429	0.379	0.41	1.189	1.168	1.164	0.409	0.29	0.284	1.037	1.002	1.025		12.5	0.156	0.156	0.157	0.183	0.175	0.163	0.156	0.157	0.155	0.154	0.163	0.165	0.112	0.107	0.1	0.163	0.221	0.196		12.5	0.165	0.162	0.208	0.221	0.218	0.285	0.262	0.245	0.307
12.75	0.737	0.749	0.733	0.777	0.728	0.725	0.438	0.388	0.419	1.197	1.18	1.18	0.43	0.305	0.299	1.041	1.011	1.027		12.75	0.158	0.157	0.152	0.181	0.182	0.164	0.155	0.147	0.161	0.154	0.167	0.166	0.105	0.109	0.1	0.161	0.21	0.196		12.75	0.168	0.164	0.213	0.227	0.224	0.294	0.27	0.251	0.316
13	0.747	0.762	0.747	0.777	0.728	0.725	0.447	0.396	0.428	1.19	1.171	1.168	0.453	0.323	0.316	1.039	1.024	1.031		13	0.156	0.158	0.171	0.186	0.18	0.17	0.167	0.157	0.165	0.157	0.166	0.168	0.112	0.102	0.1	0.167	0.22	0.198		13	0.171	0.167	0.218	0.235	0.23	0.305	0.279	0.26	0.326
13.25	0.8	0.821	0.812	0.767	0.716	0.714	0.457	0.404	0.436	1.193	1.182	1.174	0.474	0.342	0.335	1.039	1.028	1.035		13.25	0.159	0.163	0.159	0.185	0.182	0.174	0.159	0.154	0.157	0.159	0.165	0.166	0.105	0.109	0.1	0.157	0.226	0.197		13.25	0.174	0.171	0.224	0.241	0.233	0.315	0.288	0.268	0.338
13.5	0.824	0.863	0.853	0.759	0.709	0.706	0.465	0.411	0.444	1.191	1.183	1.177	0.493	0.358	0.352	1.035	1.035	1.036		13.5	0.16	0.164	0.161	0.177	0.195	0.169	0.162	0.15	0.163	0.159	0.168	0.17	0.106	0.107	0.1	0.173	0.202	0.195		13.5	0.177	0.173	0.228	0.249	0.241	0.324	0.294	0.274	0.348
13.75	0.829	0.865	0.857	0.754	0.706	0.704	0.474	0.419	0.452	1.189	1.181	1.175	0.516	0.379	0.374	1.034	1.039	1.035		13.75	0.163	0.164	0.166	0.193	0.189	0.171	0.168	0.162	0.167	0.161	0.17	0.17	0.106	0.106	0.101	0.163	0.218	0.201		13.75	0.181	0.179	0.234	0.255	0.249	0.337	0.303	0.283	0.358
14	0.83	0.865	0.852	0.741	0.696	0.695	0.481	0.425	0.46	1.204	1.195	1.192	0.536	0.397	0.393	1.03	1.044	1.032		14	0.164	0.166	0.164	0.196	0.195	0.178	0.167	0.157	0.163	0.163	0.17	0.171	0.105	0.108	0.101	0.172	0.223	0.203		14	0.185	0.181	0.238	0.263	0.258	0.347	0.314	0.289	0.37
14.25	0.832	0.865	0.854	0.741	0.695	0.693	0.49	0.433	0.468	1.191	1.183	1.182	0.553	0.42	0.416	1.019	1.04	1.026		14.25	0.168	0.169	0.165	0.197	0.202	0.184	0.167	0.161	0.169	0.164	0.173	0.177	0.11	0.103	0.101	0.171	0.216	0.211		14.25	0.187	0.184	0.244	0.271	0.268	0.359	0.322	0.297	0.379
14.5	0.827	0.86	0.854	0.742	0.694	0.692	0.497	0.44	0.475	1.187	1.18	1.177	0.564	0.445	0.439	1.018	1.042	1.026		14.5	0.169	0.178	0.173	0.204	0.207	0.18	0.167	0.161	0.168	0.166	0.175	0.18	0.109	0.102	0.101	0.172	0.214	0.212		14.5	0.191	0.188	0.25	0.279	0.273	0.373	0.333	0.306	0.392
14.75	0.828	0.864	0.853	0.734	0.687	0.685	0.504	0.447	0.483	1.208	1.198	1.198	0.573	0.465	0.455	1.008	1.044	1.023		14.75	0.171	0.173	0.174	0.207	0.217	0.188	0.169	0.156	0.163	0.167	0.177	0.178	0.109	0.105	0.101	0.172	0.209	0.207		14.75	0.195	0.192	0.256	0.287	0.281	0.387	0.346	0.317	0.404
15	0.821	0.858	0.851	0.73	0.684	0.684	0.509	0.455	0.491	1.193	1.184	1.181	0.584	0.488	0.467	1.005	1.035	1.013		15	0.174	0.182	0.176	0.223	0.214	0.187	0.171	0.167	0.177	0.169	0.18	0.183	0.109	0.105	0.101	0.18	0.212	0.225		15	0.199	0.196	0.262	0.296	0.285	0.398	0.356	0.325	0.416
15.25	0.82	0.852	0.857	0.728	0.682	0.682	0.513	0.462	0.498	1.185	1.176	1.17	0.591	0.504	0.477	1	1.033	1.007		15.25	0.175	0.179	0.183	0.214	0.213	0.195	0.174	0.164	0.178	0.17	0.18	0.184	0.105	0.103	0.101	0.179	0.213	0.233		15.25	0.202	0.199	0.268	0.308	0.297	0.416	0.367	0.336	0.423
15.5	0.819	0.849	0.857	0.728	0.682	0.683	0.514	0.469	0.503	1.174	1.165	1.16	0.6	0.517	0.488	0.993	1.027	0.999		15.5	0.18	0.185	0.186	0.214	0.211	0.192	0.173	0.163	0.171	0.173	0.183	0.189	0.109	0.108	0.101	0.193	0.213	0.204		15.5	0.207	0.204	0.276	0.317	0.31	0.428	0.378	0.345	0.434
15.75	0.81	0.842	0.853	0.722	0.677	0.678	0.515	0.476	0.507	1.167	1.16	1.157	0.606	0.526	0.495	0.987	1.025	0.994		15.75	0.182	0.192	0.191	0.21	0.208	0.199	0.176	0.164	0.168	0.175	0.187	0.194	0.108	0.108	0.101	0.193	0.213	0.213		15.75	0.212	0.208	0.283	0.328	0.322	0.442	0.39	0.356	0.449
16	0.808	0.845	0.852	0.72	0.676	0.677	0.515	0.482	0.509	1.164	1.154	1.15	0.614	0.535	0.502	0.981	1.024	0.989		16	0.187	0.191	0.194	0.207	0.205	0.2	0.178	0.166	0.183	0.176	0.188	0.194	0.108	0.111	0.101	0.192	0.219	0.226		16	0.215	0.212	0.29	0.337	0.329	0.454	0.399	0.364	0.458
16.25	0.808	0.847	0.852	0.717	0.673	0.675	0.514	0.486	0.509	1.159	1.151	1.148	0.622	0.542	0.509	0.971	1.013	0.978		16.25	0.189	0.198	0.199	0.202	0.201	0.204	0.178	0.167	0.179	0.179	0.19	0.194	0.107	0.102	0.101	0.195	0.218	0.225		16.25	0.22	0.219	0.299	0.352	0.345	0.469	0.411	0.378	0.468
16.5	0.808	0.845	0.853	0.716	0.673	0.675	0.513	0.488	0.509	1.158	1.148	1.145	0.629	0.547	0.516	0.963	1.007	0.969		16.5	0.194	0.204	0.205	0.201	0.201	0.21	0.179	0.169	0.177	0.183	0.192	0.195	0.105	0.103	0.101	0.184	0.218	0.218		16.5	0.225	0.223	0.306	0.359	0.356	0.485	0.425	0.388	0.482
16.75	0.809	0.844	0.853	0.715	0.672	0.675	0.514	0.49	0.51	1.149	1.139	1.136	0.637	0.556	0.525	0.953	0.999	0.96		16.75	0.199	0.208	0.213	0.199	0.199	0.215	0.181	0.17	0.176	0.184	0.194	0.192	0.105	0.103	0.101	0.192	0.221	0.233		16.75	0.23	0.227	0.312	0.369	0.366	0.499	0.432	0.397	0.495
17	0.807	0.842	0.851	0.709	0.666	0.668	0.513	0.49	0.51	1.161	1.15	1.146	0.642	0.56	0.529	0.944	0.99	0.95		17	0.2	0.21	0.218	0.201	0.199	0.222	0.183	0.173	0.18	0.187	0.202	0.195	0.109	0.106	0.102	0.198	0.224	0.231		17	0.236	0.234	0.322	0.383	0.378	0.514	0.444	0.41	0.506
17.25	0.813	0.844	0.855	0.708	0.664	0.666	0.512	0.49	0.511	1.158	1.146	1.144	0.649	0.567	0.538	0.933	0.981	0.94		17.25	0.207	0.22	0.226	0.204	0.201	0.224	0.185	0.174	0.185	0.191	0.202	0.194	0.107	0.104	0.102	0.191	0.225	0.225		17.25	0.241	0.238	0.33	0.396	0.39	0.529	0.455	0.421	0.518
17.5	0.812	0.843	0.852	0.708	0.665	0.668	0.512	0.49	0.511	1.148	1.135	1.131	0.658	0.574	0.546	0.926	0.973	0.93		17.5	0.215	0.223	0.226	0.203	0.2	0.231	0.188	0.178	0.186	0.193	0.209	0.193	0.105	0.105	0.102	0.19	0.226	0.228		17.5	0.247	0.244	0.339	0.397	0.392	0.541	0.468	0.432	0.528
17.75	0.81	0.842	0.85	0.709	0.665	0.668	0.511	0.49	0.512	1.141	1.128	1.124	0.665	0.581	0.553	0.918	0.966	0.922		17.75	0.224	0.232	0.227	0.205	0.201	0.233	0.19	0.176	0.186	0.198	0.213	0.192	0.111	0.103	0.102	0.205	0.228	0.233		17.75	0.252	0.25	0.349	0.414	0.412	0.562	0.482	0.445	0.54
18	0.807	0.84	0.848	0.707	0.664	0.668	0.511	0.491	0.513	1.136	1.123	1.117	0.673	0.588	0.562	0.912	0.959	0.914		18	0.23	0.228	0.232	0.207	0.203	0.237	0.193	0.182	0.186	0.203	0.208	0.195	0.108	0.104	0.102	0.202	0.228	0.232		18	0.257	0.255	0.357	0.432	0.428	0.573	0.49	0.453	0.55
18.25	0.807	0.839	0.847	0.71	0.667	0.67	0.51	0.491	0.513	1.128	1.114	1.109	0.682	0.597	0.571	0.902	0.951	0.905		18.25	0.236	0.23	0.238	0.209	0.205	0.236	0.196	0.187	0.19	0.206	0.209	0.196	0.106	0.104	0.102	0.206	0.233	0.234		18.25	0.265	0.262	0.37	0.44	0.437	0.593	0.503	0.467	0.561
18.5	0.803	0.835	0.843	0.711	0.667	0.671	0.51	0.492	0.514	1.119	1.104	1.099	0.69	0.605	0.58	0.896	0.944	0.898		18.5	0.237	0.238	0.247	0.21	0.207	0.234	0.198	0.186	0.194	0.21	0.207	0.198	0.106	0.104	0.102	0.199	0.238	0.239		18.5	0.272	0.27	0.38	0.457	0.455	0.604	0.512	0.477	0.572
18.75	0.802	0.834	0.842	0.706	0.664	0.667	0.511	0.493	0.514	1.124	1.11	1.107	0.694	0.61	0.585	0.887	0.937	0.889		18.75	0.242	0.243	0.255	0.211	0.209	0.229	0.2	0.189	0.195	0.214	0.206	0.201	0.108	0.107	0.102	0.197	0.239	0.24		18.75	0.278	0.275	0.391	0.472	0.467	0.626	0.524	0.489	0.584
19	0.804	0.835	0.842	0.701	0.66	0.664	0.51	0.492	0.515	1.139	1.126	1.124	0.699	0.613	0.591	0.877	0.927	0.879		19	0.248	0.248	0.276	0.215	0.214	0.227	0.201	0.189	0.197	0.22	0.207	0.205	0.107	0.106	0.102	0.195	0.246	0.239		19	0.285	0.282	0.4	0.486	0.478	0.63	0.537	0.501	0.592
19.25	0.803	0.835	0.844	0.699	0.659	0.662	0.51	0.493	0.516	1.134	1.122	1.115	0.71	0.629	0.6	0.87	0.918	0.87		19.25	0.264	0.25	0.311	0.217	0.217	0.224	0.21	0.194	0.203	0.227	0.209	0.208	0.111	0.106	0.103	0.201	0.243	0.233		19.25	0.294	0.292	0.414	0.501	0.495	0.644	0.554	0.514	0.606
19.5	0.804	0.836	0.845	0.697	0.658	0.661	0.509	0.493	0.516	1.133	1.121	1.113	0.721	0.67	0.608	0.861	0.908	0.862		19.5	0.279	0.253	0.284	0.222	0.222	0.223	0.212	0.195	0.207	0.235	0.211	0.212	0.107	0.108	0.103	0.198	0.243	0.234		19.5	0.301	0.299	0.425	0.522	0.512	0.659	0.558	0.522	0.617
19.75	0.804	0.833	0.841	0.695	0.656	0.659	0.509	0.494	0.517	1.143	1.131	1.123	0.733	0.579	0.617	0.851	0.897	0.853		19.75	0.302	0.259	0.283	0.226	0.226	0.221	0.216	0.201	0.211	0.238	0.215	0.217	0.109	0.109	0.103	0.202	0.248	0.237		19.75	0.309	0.307	0.436	0.532	0.525	0.675	0.569	0.534	0.625
20	0.805	0.833	0.84	0.693	0.655	0.657	0.509	0.495	0.519	1.139	1.129	1.12	0.748	0.579	0.626	0.843	0.885	0.842		20	0.335	0.269	0.298	0.227	0.226	0.222	0.223	0.205	0.216	0.242	0.216	0.217	0.109	0.11	0.103	0.202	0.248	0.24		20	0.313	0.311	0.446	0.555	0.55	0.69	0.574	0.543	0.634
20.25	0.803	0.829	0.837	0.695	0.657	0.657	0.511	0.496	0.52	1.131	1.121	1.113	0.754	0.574	0.634	0.84	0.88	0.838		20.25	0.384	0.274	0.303	0.231	0.231	0.223	0.226	0.209	0.22	0.238	0.22	0.221	0.106	0.109	0.103	0.208	0.248	0.243		20.25	0.323	0.321	0.461	0.562	0.549	0.69	0.589	0.558	0.646
20.5	0.807	0.831	0.838	0.695	0.658	0.657	0.514	0.497	0.522	1.126	1.116	1.11	0.759	0.556	0.646	0.835	0.874	0.835		20.5	0.434	0.28	0.309	0.236	0.235	0.225	0.235	0.212	0.222	0.234	0.221	0.223	0.106	0.107	0.103	0.205	0.248	0.246		20.5	0.333	0.33	0.473	0.583	0.571	0.704	0.601	0.57	0.652
20.75	0.811	0.833	0.839	0.698	0.661	0.659	0.52	0.499	0.525	1.113	1.102	1.094	0.76	0.543	0.66	0.831	0.869	0.829		20.75	0.46	0.296	0.324	0.241	0.239	0.226	0.236	0.214	0.22	0.235	0.224	0.225	0.107	0.107	0.104	0.21	0.247	0.249		20.75	0.345	0.341	0.487	0.594	0.583	0.714	0.614	0.584	0.667
21	0.812	0.835	0.839	0.7	0.663	0.659	0.528	0.5	0.529	1.1	1.087	1.081	0.761	0.525	0.67	0.827	0.866	0.826		21	0.555	0.301	0.327	0.246	0.245	0.229	0.243	0.211	0.221	0.237	0.225	0.228	0.107	0.108	0.104	0.21	0.249	0.25		21	0.353	0.35	0.502	0.613	0.604	0.73	0.621	0.591	0.676
21.25	0.806	0.829	0.834	0.697	0.661	0.656	0.536	0.503	0.537	1.106	1.096	1.092	0.761	0.522	0.673	0.821	0.859	0.819		21.25	0.635	0.318	0.34	0.25	0.249	0.23	0.248	0.211	0.22	0.238	0.228	0.232	0.107	0.108	0.104	0.212	0.249	0.256		21.25	0.36	0.358	0.511	0.637	0.628	0.74	0.629	0.603	0.694
21.5	0.808	0.832	0.836	0.693	0.658	0.654	0.539	0.507	0.545	1.113	1.102	1.098	0.74	0.525	0.672	0.814	0.852	0.812		21.5	0.53	0.325	0.347	0.257	0.257	0.234	0.243	0.212	0.222	0.246	0.233	0.238	0.107	0.107	0.104	0.217	0.25	0.256		21.5	0.371	0.368	0.525	0.643	0.633	0.75	0.64	0.613	0.696
21.75	0.812	0.835	0.839	0.699	0.661	0.66	0.54	0.515	0.55	1.095	1.083	1.079	0.578	0.525	0.676	0.812	0.848	0.809		21.75	0.473	0.34	0.361	0.265	0.267	0.237	0.244	0.211	0.224	0.252	0.238	0.243	0.11	0.107	0.104	0.216	0.254	0.26		21.75	0.381	0.378	0.537	0.66	0.652	0.76	0.651	0.625	0.709
22	0.81	0.833	0.837	0.698	0.661	0.661	0.538	0.523	0.553	1.099	1.088	1.082	0.594	0.528	0.678	0.808	0.843	0.804		22	0.484	0.343	0.366	0.269	0.27	0.24	0.244	0.21	0.219	0.255	0.243	0.249	0.107	0.109	0.105	0.221	0.254	0.263		22	0.393	0.39	0.55	0.666	0.653	0.768	0.667	0.639	0.713
22.25	0.812	0.835	0.839	0.704	0.664	0.665	0.536	0.528	0.554	1.1	1.087	1.084	0.587	0.536	0.677	0.802	0.838	0.8		22.25	0.489	0.347	0.378	0.277	0.279	0.244	0.243	0.213	0.217	0.262	0.249	0.254	0.107	0.11	0.105	0.221	0.256	0.266		22.25	0.399	0.396	0.563	0.676	0.667	0.775	0.667	0.644	0.728
22.5	0.811	0.834	0.836	0.708	0.669	0.672	0.533	0.531	0.555	1.088	1.073	1.067	0.605	0.543	0.633	0.8	0.835	0.797		22.5	0.498	0.366	0.392	0.282	0.286	0.247	0.243	0.214	0.216	0.264	0.252	0.259	0.107	0.11	0.105	0.222	0.255	0.265		22.5	0.414	0.411	0.578	0.696	0.687	0.794	0.683	0.659	0.738
22.75	0.81	0.832	0.836	0.716	0.674	0.682	0.533	0.533	0.555	1.08	1.066	1.061	0.607	0.557	0.584	0.796	0.83	0.792		22.75	0.495	0.359	0.39	0.284	0.289	0.248	0.245	0.217	0.216	0.266	0.254	0.259	0.11	0.11	0.105	0.225	0.257	0.265		22.75	0.427	0.425	0.594	0.721	0.716	0.81	0.692	0.669	0.749
23	0.811	0.832	0.837	0.728	0.685	0.69	0.532	0.532	0.555	1.069	1.055	1.049	0.611	0.562	0.523	0.795	0.828	0.79		23	0.495	0.365	0.394	0.291	0.296	0.251	0.247	0.219	0.218	0.271	0.257	0.261	0.108	0.112	0.105	0.227	0.258	0.268		23	0.436	0.434	0.607	0.725	0.721	0.809	0.699	0.678	0.763
23.25	0.807	0.829	0.834	0.734	0.693	0.693	0.53	0.531	0.556	1.064	1.049	1.042	0.623	0.563	0.536	0.793	0.824	0.787		23.25	0.503	0.373	0.403	0.295	0.301	0.253	0.25	0.221	0.219	0.277	0.261	0.264	0.107	0.111	0.106	0.229	0.259	0.269		23.25	0.449	0.447	0.616	0.747	0.741	0.825	0.708	0.687	0.77
23.5	0.806	0.829	0.836	0.73	0.696	0.693	0.53	0.532	0.557	1.064	1.048	1.043	0.627	0.57	0.553	0.788	0.82	0.782		23.5	0.51	0.386	0.415	0.306	0.314	0.258	0.254	0.224	0.224	0.283	0.267	0.268	0.108	0.113	0.106	0.23	0.261	0.269		23.5	0.463	0.459	0.64	0.748	0.748	0.83	0.721	0.709	0.788
23.75	0.806	0.83	0.834	0.729	0.696	0.693	0.528	0.532	0.558	1.066	1.052	1.049	0.63	0.571	0.558	0.784	0.816	0.778		23.75	0.505	0.383	0.412	0.305	0.317	0.259	0.256	0.226	0.225	0.288	0.269	0.269	0.108	0.115	0.107	0.235	0.261	0.275		23.75	0.478	0.472	0.649	0.79	0.798	0.844	0.736	0.717	0.794
24	0.81	0.836	0.841	0.728	0.697	0.692	0.527	0.533	0.559	1.069	1.053	1.052	0.634	0.576	0.562	0.779	0.812	0.774		24	0.515	0.408	0.422	0.323	0.338	0.268	0.261	0.23	0.228	0.298	0.276	0.274	0.109	0.113	0.107	0.235	0.263	0.272		24	0.492	0.488	0.666	0.777	0.773	0.849	0.755	0.735	0.811
24.25	0.805	0.828	0.833	0.726	0.693	0.687	0.527	0.533	0.559	1.064	1.049	1.05	0.634	0.58	0.564	0.778	0.809	0.772		24.25	0.521	0.407	0.427	0.335	0.355	0.276	0.267	0.237	0.233	0.309	0.286	0.283	0.11	0.114	0.107	0.237	0.266	0.275		24.25	0.501	0.5	0.676	0.837	0.846	0.88	0.761	0.74	0.827
24.5	0.804	0.827	0.833	0.724	0.693	0.688	0.526	0.534	0.561	1.07	1.056	1.058	0.64	0.583	0.571	0.776	0.804	0.768		24.5	0.52	0.408	0.428	0.337	0.36	0.28	0.271	0.24	0.235	0.315	0.291	0.288	0.109	0.113	0.108	0.243	0.268	0.274		24.5	0.515	0.511	0.688	0.81	0.811	0.876	0.762	0.749	0.831
24.75	0.813	0.837	0.843	0.729	0.698	0.694	0.525	0.534	0.561	1.063	1.048	1.046	0.651	0.592	0.579	0.773	0.802	0.766		24.75	0.526	0.413	0.433	0.36	0.384	0.291	0.28	0.248	0.242	0.335	0.3	0.295	0.108	0.116	0.108	0.242	0.271	0.275		24.75	0.529	0.529	0.703	0.89	0.899	0.92	0.769	0.754	0.851
25	0.815	0.84	0.847	0.729	0.699	0.696	0.523	0.535	0.563	1.053	1.036	1.037	0.662	0.597	0.587	0.772	0.801	0.765		25	0.533	0.42	0.437	0.367	0.396	0.299	0.288	0.255	0.246	0.337	0.306	0.3	0.108	0.113	0.108	0.245	0.272	0.275		25	0.542	0.538	0.716	0.918	0.93	0.936	0.781	0.766	0.862
25.25	0.805	0.828	0.836	0.721	0.691	0.686	0.523	0.536	0.563	1.065	1.05	1.055	0.659	0.596	0.588	0.768	0.793	0.76		25.25	0.536	0.421	0.442	0.371	0.4	0.302	0.29	0.258	0.248	0.34	0.311	0.305	0.108	0.121	0.108	0.249	0.276	0.278		25.25	0.556	0.557	0.721	0.874	0.873	0.919	0.791	0.777	0.867
25.5	0.811	0.836	0.843	0.726	0.698	0.695	0.521	0.537	0.564	1.051	1.036	1.037	0.67	0.599	0.595	0.765	0.79	0.758		25.5	0.535	0.422	0.441	0.382	0.412	0.31	0.297	0.264	0.251	0.354	0.316	0.308	0.109	0.117	0.109	0.249	0.278	0.278		25.5	0.575	0.571	0.731	0.895	0.9	0.93	0.795	0.791	0.887
25.75	0.811	0.837	0.844	0.727	0.7	0.696	0.521	0.537	0.566	1.052	1.036	1.04	0.678	0.608	0.602	0.763	0.788	0.758		25.75	0.543	0.426	0.451	0.398	0.44	0.326	0.306	0.273	0.258	0.363	0.323	0.32	0.11	0.117	0.109	0.252	0.281	0.28		25.75	0.587	0.584	0.751	0.92	0.931	0.947	0.812	0.804	0.901
26	0.806	0.833	0.84	0.725	0.701	0.696	0.519	0.538	0.566	1.052	1.037	1.042	0.683	0.615	0.609	0.765	0.786	0.757		26	0.549	0.431	0.458	0.414	0.456	0.338	0.312	0.282	0.263	0.371	0.33	0.327	0.109	0.116	0.11	0.256	0.285	0.282		26	0.601	0.597	0.75	0.91	0.917	0.945	0.82	0.816	0.903
26.25	0.814	0.841	0.849	0.73	0.709	0.705	0.519	0.539	0.567	1.044	1.028	1.033	0.702	0.628	0.622	0.765	0.785	0.756		26.25	0.552	0.433	0.461	0.417	0.464	0.343	0.317	0.286	0.266	0.376	0.335	0.332	0.11	0.116	0.11	0.258	0.286	0.283		26.25	0.613	0.614	0.774	0.996	1.008	1.009	0.835	0.832	0.926
26.5	0.808	0.834	0.842	0.722	0.702	0.697	0.517	0.539	0.569	1.057	1.04	1.051	0.7	0.623	0.625	0.766	0.781	0.756		26.5	0.558	0.442	0.469	0.432	0.483	0.358	0.327	0.296	0.275	0.391	0.35	0.345	0.11	0.118	0.111	0.264	0.29	0.287		26.5	0.626	0.626	0.791	1.036	1.054	1.033	0.851	0.843	0.938
26.75	0.815	0.842	0.851	0.728	0.705	0.702	0.517	0.541	0.57	1.058	1.041	1.049	0.719	0.632	0.636	0.767	0.779	0.755		26.75	0.564	0.451	0.48	0.453	0.516	0.383	0.34	0.312	0.286	0.412	0.365	0.368	0.11	0.122	0.111	0.27	0.294	0.289		26.75	0.641	0.642	0.798	1.043	1.054	1.046	0.866	0.851	0.955
27	0.818	0.847	0.86	0.732	0.712	0.708	0.516	0.542	0.571	1.053	1.038	1.048	0.74	0.645	0.65	0.768	0.777	0.756		27	0.568	0.451	0.48	0.464	0.533	0.396	0.348	0.321	0.296	0.417	0.377	0.391	0.111	0.118	0.112	0.272	0.297	0.29		27	0.652	0.655	0.812	1.015	1.025	1.023	0.876	0.859	0.952
27.25	0.827	0.858	0.872	0.736	0.718	0.7	0.514	0.543	0.572	1.058	1.043	1.056	0.757	0.658	0.661	0.773	0.774	0.756		27.25	0.573	0.456	0.487	0.47	0.546	0.406	0.357	0.33	0.304	0.425	0.388	0.411	0.11	0.121	0.112	0.284	0.3	0.292		27.25	0.665	0.663	0.816	1.088	1.101	1.082	0.881	0.867	0.975
27.5	0.817	0.846	0.859	0.737	0.717	0.692	0.514	0.544	0.576	1.071	1.058	1.07	0.763	0.657	0.674	0.77	0.772	0.757		27.5	0.579	0.461	0.493	0.485	0.563	0.42	0.364	0.338	0.315	0.434	0.413	0.45	0.111	0.119	0.113	0.273	0.304	0.294		27.5	0.677	0.676	0.835	1.099	1.118	1.093	0.892	0.88	0.994
27.75	0.822	0.851	0.863	0.741	0.722	0.655	0.512	0.546	0.578	1.062	1.046	1.057	0.781	0.675	0.69	0.772	0.772	0.762		27.75	0.591	0.467	0.501	0.493	0.576	0.429	0.369	0.344	0.32	0.438	0.419	0.462	0.111	0.12	0.113	0.27	0.307	0.295		27.75	0.696	0.7	0.85	1.151	1.173	1.134	0.912	0.901	1.013
28	0.822	0.851	0.864	0.74	0.72	0.627	0.511	0.547	0.58	1.056	1.04	1.051	0.793	0.683	0.707	0.777	0.772	0.765		28	0.589	0.465	0.5	0.507	0.592	0.446	0.375	0.352	0.327	0.445	0.423	0.482	0.111	0.127	0.114	0.268	0.309	0.296		28	0.708	0.705	0.849	1.139	1.155	1.132	0.912	0.904	1.019
28.25	0.822	0.852	0.866	0.745	0.728	0.558	0.51	0.549	0.582	1.055	1.038	1.049	0.808	0.696	0.725	0.78	0.775	0.77		28.25	0.589	0.464	0.499	0.522	0.614	0.466	0.384	0.364	0.338	0.451	0.435	0.506	0.111	0.122	0.114	0.268	0.311	0.298		28.25	0.714	0.716	0.858	1.058	1.083	1.071	0.911	0.907	1.021
28.5	0.821	0.851	0.864	0.746	0.73	0.577	0.508	0.551	0.583	1.06	1.041	1.049	0.817	0.709	0.745	0.788	0.779	0.775		28.5	0.592	0.473	0.505	0.537	0.634	0.482	0.392	0.375	0.347	0.457	0.443	0.535	0.112	0.124	0.115	0.267	0.313	0.299		28.5	0.737	0.735	0.873	1.153	1.181	1.155	0.939	0.932	1.052
28.75	0.823	0.856	0.868	0.752	0.737	0.593	0.507	0.552	0.586	1.051	1.036	1.048	0.823	0.721	0.762	0.781	0.777	0.773		28.75	0.592	0.475	0.509	0.553	0.656	0.504	0.401	0.387	0.359	0.463	0.45	0.567	0.112	0.123	0.116	0.267	0.316	0.3		28.75	0.745	0.744	0.885	1.194	1.218	1.179	0.951	0.951	1.065
29	0.825	0.859	0.87	0.756	0.746	0.606	0.506	0.553	0.587	1.04	1.021	1.04	0.83	0.738	0.778	0.785	0.782	0.778		29	0.602	0.483	0.518	0.563	0.676	0.521	0.411	0.398	0.368	0.47	0.46	0.606	0.112	0.125	0.116	0.267	0.319	0.302		29	0.764	0.764	0.9	1.201	1.216	1.188	0.966	0.963	1.079
29.25	0.83	0.864	0.877	0.637	0.758	0.622	0.505	0.556	0.589	1.064	1.048	1.063	0.842	0.762	0.792	0.794	0.787	0.787		29.25	0.601	0.486	0.52	0.583	0.698	0.54	0.424	0.414	0.383	0.482	0.476	0.642	0.113	0.126	0.117	0.268	0.323	0.305		29.25	0.773	0.777	0.916	1.18	1.192	1.166	0.963	0.974	1.089
29.5	0.827	0.862	0.876	0.582	0.66	0.643	0.504	0.557	0.593	1.059	1.043	1.061	0.821	0.781	0.798	0.796	0.789	0.789		29.5	0.611	0.495	0.525	0.611	0.718	0.568	0.44	0.439	0.408	0.495	0.511	0.693	0.113	0.127	0.118	0.271	0.331	0.307		29.5	0.781	0.782	0.913	1.165	1.175	1.168	0.982	0.989	1.103
29.75	0.83	0.865	0.878	0.567	0.637	0.652	0.505	0.557	0.594	1.078	1.066	1.081	0.825	0.799	0.802	0.802	0.795	0.797		29.75	0.617	0.505	0.536	0.625	0.74	0.604	0.454	0.455	0.428	0.514	0.548	0.743	0.114	0.125	0.119	0.273	0.341	0.31		29.75	0.805	0.798	0.939	1.252	1.263	1.236	1.004	1.007	1.118
30	0.849	0.887	0.903	0.591	0.655	0.683	0.506	0.56	0.597	1.074	1.059	1.077	0.833	0.827	0.805	0.805	0.796	0.801		30	0.623	0.511	0.54	0.63	0.753	0.619	0.46	0.463	0.436	0.516	0.565	0.779	0.114	0.126	0.119	0.273	0.343	0.312		30	0.804	0.804	0.943	1.207	1.216	1.21	1.003	1.019	1.129
30.25	0.829	0.865	0.877	0.585	0.624	0.671	0.506	0.562	0.601	1.063	1.05	1.072	0.836	0.831	0.804	0.807	0.799	0.804		30.25	0.626	0.516	0.542	0.636	0.763	0.634	0.467	0.474	0.447	0.515	0.58	0.816	0.114	0.13	0.12	0.273	0.345	0.313		30.25	0.817	0.813	0.956	1.188	1.191	1.188	1.02	1.046	1.16
30.5	0.825	0.862	0.872	0.609	0.66	0.678	0.506	0.564	0.601	1.059	1.043	1.067	0.832	0.829	0.802	0.803	0.798	0.804		30.5	0.624	0.517	0.541	0.666	0.785	0.66	0.478	0.49	0.464	0.518	0.612	0.857	0.115	0.131	0.121	0.273	0.35	0.316		30.5	0.823	0.82	0.972	1.222	1.224	1.227	1.035	1.055	1.16
30.75	0.841	0.88	0.891	0.633	0.688	0.71	0.507	0.566	0.606	1.052	1.038	1.063	0.846	0.844	0.817	0.802	0.801	0.807		30.75	0.631	0.525	0.547	0.664	0.794	0.673	0.483	0.5	0.475	0.517	0.634	0.895	0.115	0.132	0.122	0.274	0.352	0.317		30.75	0.833	0.835	0.993	1.265	1.252	1.264	1.045	1.065	1.171
31	0.837	0.878	0.888	0.645	0.707	0.717	0.507	0.566	0.607	1.055	1.04	1.064	0.854	0.845	0.827	0.803	0.809	0.81		31	0.639	0.535	0.555	0.689	0.82	0.703	0.501	0.521	0.499	0.525	0.677	0.935	0.116	0.13	0.122	0.275	0.358	0.32		31	0.85	0.85	1.009	1.285	1.263	1.272	1.059	1.079	1.182
31.25	0.841	0.884	0.893	0.659	0.728	0.739	0.508	0.569	0.608	1.056	1.04	1.064	0.863	0.85	0.836	0.801	0.809	0.809		31.25	0.64	0.54	0.557	0.706	0.827	0.719	0.516	0.54	0.52	0.525	0.709	0.97	0.116	0.13	0.123	0.276	0.363	0.323		31.25	0.866	0.869	1.029	1.328	1.323	1.301	1.066	1.089	1.191
31.5	0.832	0.87	0.883	0.664	0.728	0.728	0.508	0.571	0.61	1.076	1.055	1.072	0.866	0.844	0.839	0.8	0.815	0.81		31.5	0.645	0.545	0.559	0.713	0.844	0.74	0.524	0.551	0.531	0.53	0.741	1.002	0.117	0.133	0.124	0.278	0.369	0.326		31.5	0.863	0.871	1.023	1.273	1.254	1.255	1.055	1.098	1.2
31.75	0.839	0.883	0.898	0.717	0.764	0.784	0.509	0.573	0.613	1.082	1.066	1.085	0.888	0.866	0.852	0.798	0.814	0.808		31.75	0.646	0.55	0.572	0.748	0.876	0.777	0.542	0.578	0.563	0.559	0.799	1.036	0.117	0.131	0.125	0.282	0.387	0.333		31.75	0.905	0.912	1.075	1.356	1.343	1.333	1.097	1.131	1.223
32	0.826	0.864	0.879	0.723	0.76	0.742	0.511	0.576	0.616	1.086	1.069	1.084	0.881	0.854	0.844	0.801	0.815	0.811		32	0.654	0.556	0.577	0.771	0.899	0.806	0.556	0.597	0.586	0.561	0.834	1.058	0.118	0.133	0.125	0.283	0.397	0.336		32	0.933	0.936	1.102	1.368	1.367	1.341	1.107	1.136	1.221
32.25	0.83	0.87	0.887	0.74	0.778	0.774	0.511	0.577	0.618	1.086	1.068	1.077	0.892	0.867	0.805	0.801	0.816	0.811		32.25	0.653	0.557	0.577	0.785	0.912	0.828	0.57	0.618	0.611	0.568	0.869	1.066	0.118	0.134	0.126	0.284	0.406	0.339		32.25	0.915	0.919	1.085	1.362	1.356	1.344	1.118	1.143	1.228
32.5	0.851	0.896	0.912	0.762	0.806	0.825	0.513	0.58	0.621	1.094	1.08	1.083	0.913	0.897	0.802	0.799	0.816	0.812		32.5	0.659	0.566	0.581	0.807	0.93	0.845	0.587	0.646	0.644	0.586	0.905	1.075	0.119	0.134	0.127	0.288	0.427	0.345		32.5	0.97	0.974	1.139	1.391	1.377	1.369	1.148	1.171	1.245
32.75	0.847	0.891	0.905	0.767	0.813	0.83	0.514	0.582	0.624	1.078	1.062	1.059	0.924	0.903	0.813	0.801	0.816	0.812		32.75	0.659	0.566	0.58	0.812	0.942	0.866	0.594	0.662	0.663	0.586	0.934	1.077	0.119	0.133	0.128	0.289	0.432	0.348		32.75	0.963	0.964	1.124	1.363	1.352	1.357	1.152	1.17	1.258
33	0.844	0.888	0.903	0.777	0.82	0.836	0.515	0.584	0.626	1.067	1.052	1.048	0.929	0.906	0.822	0.8	0.814	0.812		33	0.665	0.567	0.585	0.828	0.957	0.895	0.607	0.683	0.688	0.583	0.969	1.08	0.12	0.144	0.128	0.29	0.437	0.351		33	0.984	0.982	1.146	1.362	1.35	1.357	1.156	1.178	1.257
33.25	0.846	0.889	0.903	0.792	0.838	0.855	0.517	0.586	0.628	1.066	1.05	1.05	0.937	0.912	0.831	0.799	0.814	0.812		33.25	0.671	0.572	0.593	0.848	0.972	0.918	0.62	0.709	0.724	0.594	1.002	1.086	0.121	0.139	0.129	0.293	0.451	0.358		33.25	1.011	1.008	1.169	1.349	1.333	1.357	1.167	1.192	1.267
33.5	0.846	0.892	0.908	0.791	0.841	0.867	0.519	0.588	0.631	1.071	1.054	1.052	0.951	0.924	0.842	0.799	0.813	0.81		33.5	0.686	0.59	0.602	0.86	0.983	0.936	0.634	0.736	0.759	0.595	1.035	1.094	0.121	0.143	0.13	0.295	0.463	0.363		33.5	1.017	1.012	1.168	1.365	1.35	1.363	1.166	1.194	1.269
33.75	0.851	0.898	0.915	0.803	0.859	0.889	0.521	0.59	0.633	1.073	1.058	1.055	0.968	0.82	0.855	0.797	0.814	0.811		33.75	0.693	0.589	0.6	0.876	0.983	0.943	0.649	0.765	0.792	0.599	1.06	1.103	0.122	0.141	0.131	0.297	0.478	0.371		33.75	1.063	1.056	1.21	1.387	1.367	1.387	1.189	1.207	1.276
34	0.848	0.896	0.911	0.815	0.86	0.895	0.522	0.591	0.635	1.065	1.047	1.045	0.973	0.828	0.862	0.793	0.814	0.81		34	0.698	0.592	0.605	0.866	0.99	0.956	0.656	0.792	0.832	0.6	1.09	1.107	0.123	0.137	0.131	0.299	0.491	0.378		34	1.079	1.072	1.222	1.407	1.39	1.395	1.212	1.22	1.287
34.25	0.866	0.917	0.938	0.845	0.898	0.933	0.525	0.593	0.636	1.075	1.058	1.057	0.991	0.852	0.879	0.793	0.813	0.81		34.25	0.711	0.6	0.612	0.9	1.01	0.975	0.681	0.832	0.888	0.614	1.126	1.115	0.123	0.14	0.132	0.302	0.511	0.389		34.25	1.087	1.081	1.226	1.398	1.384	1.393	1.21	1.227	1.296
34.5	0.868	0.921	0.939	0.857	0.909	0.944	0.526	0.595	0.641	1.073	1.056	1.051	1.002	0.866	0.893	0.793	0.814	0.811		34.5	0.72	0.606	0.62	0.918	1.025	0.994	0.708	0.879	0.944	0.637	1.144	1.13	0.124	0.137	0.133	0.307	0.543	0.404		34.5	1.099	1.1	1.241	1.426	1.4	1.416	1.233	1.244	1.309
34.75	0.857	0.909	0.927	0.85	0.903	0.94	0.529	0.597	0.641	1.07	1.053	1.044	1.009	0.873	0.906	0.793	0.815	0.815		34.75	0.73	0.61	0.621	0.932	1.027	1.004	0.721	0.907	0.982	0.636	1.166	1.121	0.125	0.138	0.134	0.31	0.561	0.414		34.75	1.139	1.136	1.273	1.419	1.411	1.41	1.237	1.249	1.308
35	0.857	0.908	0.921	0.847	0.904	0.94	0.531	0.599	0.643	1.081	1.064	1.056	1.019	0.87	0.92	0.794	0.817	0.819		35	0.735	0.616	0.625	0.952	1.04	1.018	0.74	0.942	1.03	0.657	1.174	1.008	0.125	0.138	0.135	0.317	0.594	0.433		35	1.154	1.156	1.29	1.425	1.42	1.419	1.25	1.254	1.312
35.25	0.869	0.921	0.936	0.876	0.926	0.958	0.533	0.601	0.645	1.068	1.051	1.038	1.016	0.884	0.923	0.795	0.818	0.813		35.25	0.739	0.62	0.628	0.958	1.036	1.029	0.751	0.971	1.066	0.66	1.184	0.867	0.126	0.141	0.134	0.318	0.615	0.447		35.25	1.173	1.181	1.308	1.442	1.432	1.429	1.262	1.273	1.327
35.5	0.861	0.913	0.929	0.87	0.923	0.955	0.535	0.603	0.647	1.065	1.047	1.035	1.022	0.89	0.93	0.794	0.817	0.803		35.5	0.746	0.624	0.632	0.972	1.028	1.04	0.764	0.995	1.098	0.667	1.193	0.797	0.126	0.139	0.135	0.321	0.638	0.465		35.5	1.175	1.185	1.311	1.43	1.417	1.424	1.261	1.269	1.324
35.75	0.856	0.909	0.923	0.868	0.928	0.969	0.537	0.604	0.65	1.074	1.057	1.043	1.032	0.896	0.944	0.796	0.817	0.793		35.75	0.747	0.625	0.632	0.979	1.017	1.048	0.774	1.024	1.128	0.671	1.202	0.744	0.127	0.142	0.136	0.325	0.661	0.482		35.75	1.205	1.21	1.326	1.429	1.421	1.421	1.26	1.273	1.324
36	0.863	0.919	0.932	0.886	0.941	0.98	0.54	0.607	0.651	1.07	1.052	1.035	1.035	0.903	0.947	0.795	0.818	0.785		36	0.748	0.624	0.631	0.981	1.009	1.053	0.785	1.045	1.152	0.675	1.212	0.673	0.128	0.145	0.137	0.327	0.69	0.502		36	1.211	1.218	1.332	1.431	1.421	1.422	1.266	1.276	1.33
36.25	0.864	0.919	0.935	0.9	0.953	0.995	0.542	0.608	0.652	1.077	1.059	1.041	1.051	0.916	0.966	0.787	0.82	0.776		36.25	0.76	0.632	0.638	0.998	1.01	1.063	0.807	1.083	1.187	0.682	1.246	0.634	0.128	0.141	0.137	0.332	0.732	0.53		36.25	1.223	1.233	1.345	1.441	1.43	1.428	1.281	1.286	1.342
36.5	0.893	0.953	0.97	0.943	0.986	1.018	0.544	0.608	0.653	1.075	1.057	1.04	1.06	0.933	0.977	0.78	0.814	0.771		36.5	0.768	0.635	0.64	1.007	1.008	1.067	0.818	1.1	1.206	0.7	1.225	0.681	0.129	0.143	0.138	0.336	0.76	0.556		36.5	1.257	1.265	1.366	1.456	1.451	1.442	1.289	1.303	1.354
36.75	0.898	0.954	0.972	0.938	0.981	1.008	0.546	0.61	0.656	1.071	1.053	1.032	1.061	0.937	0.98	0.773	0.806	0.766		36.75	0.773	0.639	0.644	1.016	1.007	1.073	0.838	1.117	1.221	0.719	1.199	0.682	0.129	0.143	0.14	0.34	0.795	0.584		36.75	1.256	1.272	1.368	1.46	1.452	1.44	1.286	1.301	1.355
37	0.917	0.975	0.987	0.957	0.998	1.026	0.55	0.612	0.657	1.073	1.056	1.038	1.069	0.952	0.988	0.767	0.798	0.761		37	0.782	0.647	0.651	1.02	1.008	1.073	0.858	1.15	1.239	0.749	0.946	0.701	0.131	0.144	0.14	0.346	0.837	0.616		37	1.265	1.287	1.377	1.468	1.463	1.443	1.304	1.319	1.373
37.25	0.924	0.983	0.989	0.966	1	1.022	0.554	0.614	0.659	1.064	1.047	1.026	1.068	0.962	0.991	0.76	0.792	0.756		37.25	0.79	0.65	0.654	1.018	1.006	1.066	0.87	1.165	1.252	0.754	0.833	0.692	0.131	0.147	0.144	0.348	0.863	0.642		37.25	1.272	1.293	1.383	1.456	1.454	1.428	1.308	1.311	1.366
37.5	0.91	0.971	0.981	0.96	1.005	1.039	0.555	0.613	0.661	1.078	1.062	1.045	1.082	0.964	1.001	0.753	0.783	0.748		37.5	0.791	0.652	0.655	1.029	1.01	1.058	0.885	1.173	1.264	0.761	0.915	0.685	0.132	0.147	0.144	0.352	0.892	0.668		37.5	1.291	1.314	1.405	1.472	1.463	1.442	1.31	1.329	1.378
37.75	0.916	0.976	0.987	0.979	1.019	1.046	0.56	0.615	0.664	1.076	1.058	1.04	1.087	0.975	1.01	0.747	0.776	0.743		37.75	0.796	0.651	0.656	1.032	1.011	1.045	0.899	1.178	1.275	0.781	0.949	0.684	0.133	0.147	0.143	0.357	0.927	0.701		37.75	1.299	1.32	1.403	1.47	1.461	1.427	1.325	1.337	1.388
38	0.907	0.968	0.981	0.966	1.01	1.037	0.564	0.617	0.665	1.068	1.05	1.031	1.085	0.978	1.01	0.742	0.771	0.739		38	0.801	0.654	0.658	1.03	1.005	1.035	0.908	1.187	1.286	0.779	0.935	0.675	0.133	0.149	0.146	0.356	0.956	0.729		38	1.314	1.333	1.413	1.471	1.466	1.432	1.34	1.335	1.385
38.25	0.901	0.962	0.977	0.964	1.01	1.038	0.566	0.619	0.668	1.065	1.048	1.029	1.089	0.984	1.015	0.736	0.764	0.734		38.25	0.803	0.657	0.662	1.032	1.005	1.034	0.915	1.202	1.298	0.78	0.936	0.663	0.133	0.149	0.145	0.36	0.985	0.759		38.25	1.325	1.347	1.419	1.468	1.468	1.423	1.338	1.333	1.385
38.5	0.891	0.951	0.967	0.962	1.009	1.036	0.569	0.621	0.671	1.061	1.043	1.022	1.084	0.98	1.013	0.733	0.76	0.731		38.5	0.805	0.657	0.663	1.032	1.005	1.033	0.923	1.217	1.307	0.785	0.923	0.663	0.134	0.149	0.144	0.363	1.014	0.788		38.5	1.329	1.351	1.418	1.457	1.458	1.408	1.333	1.328	1.38
38.75	0.895	0.957	0.971	0.958	1.006	1.041	0.573	0.621	0.671	1.067	1.049	1.029	1.092	0.984	1.02	0.727	0.753	0.724		38.75	0.805	0.659	0.663	1.04	1.009	1.032	0.935	1.231	1.313	0.79	0.916	0.649	0.135	0.152	0.149	0.366	1.038	0.817		38.75	1.338	1.356	1.425	1.468	1.452	1.402	1.359	1.346	1.402
39	0.896	0.955	0.97	0.966	1.012	1.037	0.576	0.621	0.672	1.055	1.038	1.017	1.084	0.988	1.02	0.723	0.748	0.721		39	0.808	0.658	0.664	1.03	1.004	1.029	0.948	1.237	1.313	0.795	0.915	0.644	0.135	0.152	0.149	0.369	1.063	0.847		39	1.354	1.38	1.442	1.484	1.468	1.415	1.368	1.364	1.413
39.25	0.897	0.956	0.969	0.979	1.024	1.051	0.578	0.622	0.673	1.058	1.041	1.023	1.09	0.997	1.031	0.717	0.742	0.717		39.25	0.819	0.664	0.671	1.038	1.011	1.032	0.961	1.253	1.318	0.806	0.903	0.643	0.135	0.154	0.148	0.373	1.089	0.878		39.25	1.361	1.387	1.441	1.473	1.472	1.411	1.375	1.369	1.414
39.5	0.884	0.943	0.955	0.968	1.016	1.047	0.581	0.625	0.675	1.064	1.048	1.027	1.093	0.999	1.036	0.712	0.737	0.713		39.5	0.823	0.667	0.675	1.04	1.013	1.031	0.973	1.268	1.32	0.809	0.901	0.639	0.136	0.156	0.155	0.377	1.111	0.909		39.5	1.372	1.395	1.456	1.478	1.48	1.413	1.377	1.371	1.42
39.75	0.873	0.934	0.945	0.958	1.012	1.068	0.585	0.624	0.677	1.082	1.068	1.05	1.111	1.01	1.053	0.706	0.731	0.708		39.75	0.823	0.667	0.677	1.045	1.016	1.034	0.993	1.279	1.326	0.822	0.902	0.634	0.137	0.156	0.149	0.387	1.128	0.935		39.75	1.372	1.4	1.46	1.474	1.484	1.406	1.393	1.388	1.434
40	0.884	0.947	0.955	0.962	1.03	1.077	0.588	0.628	0.678	1.09	1.075	1.058	1.113	1.01	1.051	0.702	0.725	0.705		40	0.827	0.665	0.68	1.044	1.017	1.034	1	1.281	1.329	0.828	0.893	0.631	0.137	0.159	0.15	0.394	1.133	0.964		40	1.385	1.415	1.469	1.471	1.477	1.397	1.388	1.385	1.428
40.25	0.959	1.019	1.025	1.033	1.071	1.093	0.592	0.631	0.683	1.08	1.066	1.048	1.114	1.03	1.062	0.699	0.722	0.703		40.25	0.862	0.678	0.709	1.047	1.017	1.036	1.014	1.278	1.332	0.842	0.898	0.629	0.138	0.16	0.156	0.401	1.137	0.995		40.25	1.395	1.422	1.472	1.473	1.474	1.404	1.379	1.379	1.42
40.5	0.941	1.003	1.006	1.016	1.046	1.062	0.596	0.633	0.685	1.058	1.044	1.023	1.096	1.029	1.05	0.696	0.719	0.701		40.5	0.88	0.69	0.729	1.043	1.015	1.034	1.026	1.291	1.336	0.85	0.891	0.632	0.138	0.16	0.152	0.404	1.137	1.022		40.5	1.391	1.418	1.463	1.451	1.456	1.39	1.372	1.368	1.409
40.75	0.932	0.996	1.001	1.017	1.049	1.063	0.599	0.635	0.687	1.05	1.034	1.015	1.094	1.031	1.05	0.694	0.716	0.699		40.75	0.888	0.695	0.736	1.044	1.012	1.03	1.035	1.296	1.337	0.852	0.887	0.628	0.138	0.161	0.154	0.406	1.138	1.046		40.75	1.395	1.418	1.468	1.444	1.443	1.38	1.388	1.372	1.416
41	0.898	0.966	0.973	0.991	1.034	1.062	0.6	0.637	0.689	1.048	1.033	1.014	1.1	1.034	1.053	0.691	0.713	0.696		41	0.88	0.701	0.738	1.05	1.013	1.029	1.05	1.306	1.341	0.867	0.884	0.63	0.139	0.165	0.155	0.413	1.14	1.068		41	1.405	1.43	1.473	1.455	1.443	1.38	1.401	1.389	1.428
41.25	0.885	0.951	0.958	0.967	1.027	1.071	0.602	0.638	0.689	1.064	1.052	1.038	1.109	1.027	1.064	0.687	0.708	0.692		41.25	0.881	0.702	0.74	1.05	1.012	1.028	1.057	1.306	1.341	0.867	0.878	0.621	0.14	0.163	0.16	0.416	1.138	1.086		41.25	1.416	1.437	1.482	1.451	1.441	1.389	1.403	1.392	1.426
41.5	0.904	0.974	0.982	1.011	1.061	1.088	0.605	0.64	0.693	1.063	1.049	1.035	1.112	1.037	1.07	0.685	0.705	0.69		41.5	0.908	0.718	0.766	1.049	1.01	1.027	1.06	1.316	1.344	0.873	0.875	0.619	0.14	0.164	0.168	0.424	1.138	1.102		41.5	1.423	1.443	1.48	1.431	1.442	1.387	1.396	1.387	1.421
41.75	0.904	0.973	0.981	0.987	1.048	1.087	0.607	0.64	0.693	1.074	1.06	1.046	1.12	1.034	1.074	0.682	0.701	0.687		41.75	0.908	0.729	0.773	1.06	1.018	1.031	1.086	1.314	1.345	0.903	0.88	0.624	0.141	0.169	0.163	0.438	1.105	1.108		41.75	1.423	1.456	1.492	1.458	1.453	1.405	1.414	1.402	1.43
42	0.933	0.999	1.004	1.015	1.06	1.084	0.608	0.641	0.696	1.062	1.047	1.03	1.11	1.038	1.067	0.68	0.699	0.686		42	0.924	0.748	0.783	1.064	1.02	1.042	1.108	1.313	1.346	0.915	0.89	0.628	0.142	0.17	0.167	0.449	1.073	1.099		42	1.433	1.464	1.495	1.448	1.459	1.393	1.413	1.407	1.423
42.25	0.958	1.031	1.042	1.063	1.102	1.124	0.61	0.644	0.7	1.071	1.058	1.048	1.129	1.058	1.09	0.676	0.695	0.683		42.25	0.933	0.761	0.799	1.067	1.027	1.046	1.129	1.32	1.349	0.912	0.886	0.626	0.143	0.172	0.161	0.459	1.047	1.078		42.25	1.438	1.463	1.492	1.449	1.462	1.393	1.412	1.407	1.416
42.5	0.92	0.985	0.99	0.985	1.041	1.089	0.613	0.644	0.7	1.075	1.062	1.049	1.123	1.026	1.076	0.675	0.692	0.681		42.5	0.935	0.771	0.815	1.058	1.021	1.041	1.133	1.32	1.347	0.909	0.879	0.625	0.144	0.175	0.168	0.463	1.022	1.072		42.5	1.443	1.471	1.5	1.441	1.449	1.394	1.421	1.421	1.42
42.75	0.974	1.039	1.043	1.045	1.083	1.106	0.616	0.647	0.705	1.064	1.052	1.036	1.121	1.048	1.083	0.673	0.69	0.68		42.75	0.966	0.795	0.847	1.066	1.024	1.044	1.143	1.322	1.348	0.913	0.883	0.628	0.144	0.174	0.164	0.471	1.006	1.055		42.75	1.457	1.485	1.506	1.455	1.452	1.405	1.424	1.438	1.415
43	0.933	0.999	1.004	1.007	1.053	1.079	0.617	0.649	0.709	1.05	1.038	1.017	1.109	1.04	1.068	0.671	0.688	0.679		43	0.954	0.799	0.849	1.06	1.019	1.04	1.152	1.322	1.345	0.91	0.882	0.625	0.144	0.176	0.171	0.474	0.959	1.048		43	1.452	1.478	1.495	1.44	1.41	1.387	1.418	1.424	1.396
43.25	0.948	1.013	1.018	1.034	1.07	1.088	0.62	0.652	0.713	1.042	1.03	1.01	1.104	1.048	1.069	0.669	0.686	0.677		43.25	0.969	0.811	0.869	1.064	1.019	1.04	1.153	1.325	1.345	0.911	0.884	0.626	0.145	0.177	0.166	0.476	0.969	1.046		43.25	1.447	1.474	1.489	1.423	1.406	1.378	1.417	1.424	1.377
43.5	0.934	1.002	1.009	1.033	1.071	1.087	0.622	0.656	0.716	1.041	1.028	1.007	1.106	1.047	1.07	0.669	0.684	0.674		43.5	0.969	0.816	0.872	1.054	1.016	1.037	1.157	1.33	1.345	0.91	0.883	0.622	0.146	0.179	0.166	0.482	0.922	1.036		43.5	1.455	1.48	1.49	1.429	1.399	1.383	1.423	1.429	1.387
43.75	0.924	0.987	0.992	1.008	1.053	1.078	0.624	0.659	0.719	1.039	1.026	1.004	1.107	1.04	1.071	0.667	0.682	0.672		43.75	0.962	0.815	0.866	1.049	1.014	1.035	1.16	1.333	1.346	0.913	0.881	0.624	0.146	0.183	0.165	0.485	0.878	1.031		43.75	1.461	1.484	1.489	1.431	1.377	1.382	1.424	1.431	1.385
44	0.928	0.991	0.998	1.016	1.061	1.087	0.627	0.661	0.721	1.047	1.035	1.018	1.115	1.045	1.08	0.664	0.68	0.671		44	0.968	0.826	0.88	1.061	1.017	1.039	1.168	1.334	1.345	0.914	0.881	0.622	0.147	0.181	0.177	0.497	0.816	1.032		44	1.465	1.487	1.484	1.417	1.378	1.373	1.418	1.432	1.375
44.25	0.934	0.994	1	1.031	1.069	1.09	0.628	0.663	0.724	1.044	1.033	1.013	1.115	1.048	1.084	0.66	0.677	0.668		44.25	0.979	0.835	0.894	1.057	1.015	1.037	1.168	1.334	1.344	0.918	0.879	0.618	0.148	0.182	0.173	0.503	0.789	1.025		44.25	1.464	1.486	1.476	1.407	1.369	1.366	1.42	1.43	1.375
44.5	0.94	1	1.003	1.039	1.075	1.092	0.63	0.664	0.73	1.039	1.027	1.007	1.112	1.049	1.081	0.659	0.676	0.666		44.5	0.99	0.848	0.909	1.067	1.019	1.041	1.18	1.345	1.342	0.921	0.881	0.618	0.149	0.186	0.174	0.515	0.777	1.025		44.5	1.473	1.498	1.481	1.422	1.37	1.378	1.427	1.438	1.38
44.75	0.967	1.037	1.055	1.079	1.105	1.122	0.633	0.667	0.747	1.054	1.044	1.03	1.134	1.082	1.105	0.655	0.674	0.665		44.75	1.01	0.852	0.918	1.065	1.023	1.043	1.181	1.346	1.347	0.927	0.878	0.618	0.149	0.193	0.177	0.529	0.769	1.015		44.75	1.48	1.508	1.502	1.448	1.38	1.409	1.434	1.455	1.415
45	0.951	1.014	1.02	1.046	1.083	1.105	0.635	0.668	0.751	1.052	1.043	1.025	1.127	1.066	1.098	0.654	0.67	0.663		45	0.985	0.85	0.904	1.06	1.02	1.041	1.183	1.345	1.345	0.926	0.877	0.618	0.149	0.187	0.18	0.532	0.762	1.014		45	1.492	1.519	1.506	1.438	1.395	1.41	1.438	1.451	1.418
45.25	0.978	1.042	1.048	1.084	1.11	1.124	0.636	0.671	0.754	1.051	1.043	1.024	1.133	1.082	1.107	0.651	0.668	0.661		45.25	1.029	0.877	0.94	1.068	1.02	1.043	1.186	1.347	1.343	0.927	0.876	0.618	0.15	0.193	0.178	0.546	0.762	0.973		45.25	1.504	1.529	1.505	1.421	1.38	1.393	1.423	1.447	1.43
45.5	0.975	1.037	1.043	1.069	1.096	1.107	0.638	0.673	0.759	1.04	1.03	1.008	1.124	1.075	1.094	0.65	0.667	0.66		45.5	1.009	0.872	0.934	1.063	1.02	1.043	1.187	1.345	1.338	0.927	0.873	0.627	0.151	0.197	0.175	0.552	0.763	0.902		45.5	1.499	1.523	1.489	1.394	1.372	1.374	1.421	1.427	1.419
45.75	0.985	1.043	1.047	1.073	1.093	1.101	0.639	0.676	0.762	1.03	1.02	0.995	1.117	1.075	1.089	0.648	0.664	0.659		45.75	1.028	0.89	0.953	1.061	1.018	1.042	1.187	1.345	1.337	0.926	0.874	0.62	0.151	0.201	0.174	0.554	0.762	0.891		45.75	1.497	1.524	1.485	1.384	1.356	1.365	1.404	1.423	1.416
46	0.964	1.021	1.025	1.058	1.089	1.101	0.64	0.678	0.767	1.027	1.018	0.991	1.116	1.073	1.087	0.647	0.663	0.657		46	1.003	0.872	0.93	1.059	1.014	1.038	1.189	1.344	1.337	0.924	0.876	0.622	0.152	0.202	0.176	0.554	0.756	0.883		46	1.495	1.521	1.474	1.381	1.357	1.357	1.403	1.401	1.406
46.25	0.963	1.016	1.018	1.047	1.08	1.094	0.643	0.682	0.772	1.025	1.015	0.985	1.119	1.074	1.092	0.646	0.661	0.656		46.25	0.994	0.868	0.918	1.064	1.019	1.04	1.191	1.346	1.335	0.923	0.875	0.62	0.153	0.201	0.176	0.558	0.752	0.818		46.25	1.499	1.525	1.48	1.389	1.365	1.358	1.411	1.397	1.407
46.5	0.981	1.036	1.034	1.06	1.085	1.092	0.645	0.684	0.777	1.019	1.011	0.981	1.11	1.071	1.085	0.645	0.661	0.655		46.5	1.017	0.894	0.95	1.057	1.017	1.036	1.196	1.346	1.327	0.923	0.874	0.62	0.154	0.199	0.178	0.564	0.747	0.743		46.5	1.49	1.524	1.478	1.382	1.367	1.354	1.394	1.387	1.405
46.75	0.942	0.985	0.981	0.997	1.034	1.067	0.645	0.684	0.78	1.032	1.023	1.002	1.121	1.047	1.095	0.643	0.659	0.653		46.75	0.991	0.871	0.914	1.068	1.017	1.036	1.2	1.348	1.332	0.919	0.872	0.616	0.154	0.201	0.186	0.569	0.741	0.7		46.75	1.487	1.52	1.468	1.387	1.374	1.351	1.39	1.384	1.408
47	1.013	1.062	1.059	1.091	1.114	1.122	0.649	0.685	0.784	1.041	1.033	1.006	1.134	1.083	1.112	0.642	0.657	0.652		47	1.048	0.919	0.973	1.065	1.02	1.037	1.2	1.35	1.331	0.915	0.873	0.613	0.155	0.2	0.182	0.572	0.737	0.689		47	1.489	1.522	1.471	1.393	1.385	1.356	1.401	1.396	1.418
47.25	1.002	1.057	1.055	1.093	1.113	1.119	0.652	0.687	0.794	1.037	1.027	1.004	1.129	1.082	1.107	0.641	0.657	0.65		47.25	1.056	0.929	0.981	1.072	1.021	1.041	1.206	1.351	1.329	0.913	0.872	0.615	0.156	0.199	0.183	0.591	0.734	0.685		47.25	1.485	1.514	1.466	1.38	1.376	1.343	1.395	1.386	1.415
47.5	1.007	1.057	1.052	1.072	1.091	1.095	0.659	0.689	0.804	1.021	1.011	0.981	1.114	1.075	1.092	0.64	0.656	0.65		47.5	1.058	0.936	0.988	1.069	1.018	1.037	1.212	1.351	1.329	0.913	0.872	0.619	0.157	0.201	0.183	0.603	0.734	0.671		47.5	1.486	1.516	1.466	1.379	1.373	1.342	1.398	1.393	1.411
47.75	1.008	1.058	1.054	1.078	1.095	1.098	0.661	0.689	0.819	1.015	1.006	0.973	1.115	1.079	1.093	0.638	0.652	0.648		47.75	1.046	0.928	0.979	1.066	1.018	1.036	1.211	1.349	1.318	0.913	0.872	0.614	0.157	0.199	0.185	0.617	0.735	0.628		47.75	1.483	1.513	1.457	1.369	1.364	1.343	1.4	1.389	1.406
48	1.04	1.083	1.075	1.099	1.115	1.114	0.663	0.696	0.83	1.019	1.012	0.986	1.126	1.094	1.107	0.637	0.651	0.648		48	1.072	0.952	1.006	1.066	1.021	1.039	1.215	1.351	1.315	0.913	0.876	0.614	0.158	0.201	0.185	0.626	0.729	0.621		48	1.484	1.506	1.454	1.362	1.367	1.346	1.399	1.377	1.408
48.25	1.042	1.082	1.069	1.087	1.102	1.099	0.666	0.698	0.847	1.011	1.002	0.975	1.118	1.089	1.097	0.635	0.649	0.647		48.25	1.075	0.955	1.006	1.072	1.022	1.04	1.217	1.355	1.312	0.914	0.875	0.617	0.158	0.199	0.186	0.643	0.726	0.612		48.25	1.468	1.497	1.443	1.355	1.354	1.342	1.394	1.374	1.399
48.5	1.023	1.067	1.059	1.079	1.095	1.09	0.669	0.7	0.853	1.003	0.993	0.965	1.111	1.082	1.089	0.634	0.648	0.645		48.5	1.068	0.95	1	1.066	1.017	1.035	1.211	1.351	1.307	0.909	0.871	0.615	0.159	0.198	0.189	0.647	0.721	0.608		48.5	1.471	1.495	1.451	1.349	1.356	1.335	1.386	1.379	1.398
48.75	1.011	1.055	1.05	1.082	1.101	1.099	0.673	0.699	0.865	1.005	0.995	0.97	1.116	1.086	1.096	0.633	0.647	0.644		48.75	1.051	0.947	0.996	1.064	1.016	1.034	1.22	1.351	1.303	0.909	0.866	0.612	0.16	0.198	0.19	0.659	0.719	0.605		48.75	1.471	1.493	1.454	1.368	1.365	1.349	1.398	1.383	1.408
49	1.015	1.056	1.047	1.085	1.107	1.105	0.678	0.703	0.879	1.008	0.998	0.973	1.124	1.091	1.1	0.631	0.645	0.642		49	1.038	0.93	0.974	1.061	1.015	1.033	1.221	1.348	1.303	0.907	0.863	0.613	0.161	0.198	0.191	0.664	0.718	0.602		49	1.483	1.505	1.452	1.377	1.38	1.358	1.408	1.392	1.4
49.25	1.003	1.037	1.024	1.064	1.089	1.093	0.695	0.708	0.908	1.008	1	0.973	1.129	1.087	1.108	0.629	0.644	0.641		49.25	1.035	0.923	0.962	1.063	1.015	1.035	1.225	1.357	1.309	0.905	0.86	0.613	0.162	0.201	0.194	0.679	0.713	0.596		49.25	1.486	1.508	1.459	1.377	1.376	1.356	1.397	1.403	1.406
49.5	1.034	1.073	1.061	1.102	1.117	1.116	0.7	0.709	0.907	1.015	1.007	0.983	1.132	1.101	1.114	0.627	0.643	0.64		49.5	1.082	0.978	1.023	1.074	1.019	1.037	1.226	1.355	1.309	0.906	0.864	0.61	0.163	0.2	0.196	0.69	0.713	0.594		49.5	1.478	1.504	1.451	1.373	1.369	1.352	1.4	1.399	1.397
49.75	1.046	1.085	1.072	1.096	1.109	1.103	0.703	0.713	0.895	1.011	1.003	0.978	1.128	1.101	1.11	0.626	0.641	0.639		49.75	1.079	0.983	1.022	1.069	1.017	1.043	1.231	1.359	1.313	0.904	0.872	0.611	0.165	0.203	0.194	0.727	0.709	0.593		49.75	1.467	1.508	1.451	1.379	1.38	1.362	1.408	1.406	1.416
50	1.053	1.089	1.073	1.082	1.094	1.084	0.702	0.718	0.899	1.003	0.994	0.966	1.117	1.09	1.098	0.626	0.641	0.64		50	1.085	0.993	1.027	1.071	1.016	1.041	1.231	1.356	1.311	0.906	0.875	0.61	0.166	0.203	0.199	0.723	0.697	0.588		50	1.46	1.503	1.444	1.37	1.37	1.351	1.393	1.391	1.395
50.25	1.041	1.075	1.06	1.079	1.094	1.084	0.673	0.721	0.912	0.996	0.987	0.958	1.119	1.093	1.097	0.625	0.64	0.638		50.25	1.051	0.959	0.99	1.069	1.017	1.04	1.23	1.355	1.317	0.904	0.878	0.608	0.168	0.205	0.198	0.736	0.698	0.586		50.25	1.46	1.5	1.438	1.361	1.363	1.343	1.385	1.386	1.393
50.5	1.074	1.107	1.087	1.102	1.113	1.098	0.634	0.721	0.917	1.006	0.996	0.974	1.125	1.098	1.105	0.624	0.637	0.636		50.5	1.095	1.004	1.03	1.081	1.021	1.044	1.231	1.353	1.309	0.906	0.876	0.607	0.169	0.206	0.198	0.744	0.692	0.58		50.5	1.465	1.511	1.445	1.378	1.381	1.36	1.392	1.397	1.402
50.75	1.053	1.083	1.064	1.09	1.103	1.091	0.624	0.724	0.928	0.997	0.988	0.961	1.118	1.089	1.099	0.622	0.637	0.635		50.75	1.089	0.998	1.024	1.067	1.014	1.039	1.226	1.348	1.303	0.902	0.874	0.606	0.169	0.205	0.199	0.748	0.693	0.579		50.75	1.442	1.493	1.43	1.348	1.356	1.345	1.382	1.384	1.396
51	1.042	1.074	1.055	1.085	1.101	1.09	0.624	0.727	0.933	0.993	0.985	0.958	1.117	1.086	1.096	0.621	0.636	0.634		51	1.061	0.975	1.003	1.07	1.013	1.038	1.224	1.347	1.301	0.9	0.877	0.603	0.169	0.204	0.198	0.747	0.674	0.578		51	1.453	1.488	1.41	1.326	1.34	1.323	1.367	1.372	1.362
51.25	1.045	1.071	1.048	1.083	1.098	1.089	0.627	0.73	0.942	0.988	0.981	0.952	1.112	1.081	1.096	0.62	0.634	0.633		51.25	1.092	1.005	1.03	1.068	1.009	1.034	1.223	1.345	1.298	0.899	0.873	0.601	0.17	0.204	0.205	0.748	0.672	0.577		51.25	1.45	1.494	1.409	1.347	1.353	1.339	1.374	1.372	1.373
51.5	1.058	1.089	1.064	1.083	1.096	1.085	0.639	0.731	0.949	0.986	0.979	0.955	1.113	1.085	1.095	0.62	0.634	0.632		51.5	1.08	1.003	1.028	1.068	1.015	1.037	1.228	1.349	1.298	0.9	0.874	0.605	0.173	0.205	0.205	0.759	0.671	0.574		51.5	1.443	1.49	1.403	1.336	1.343	1.33	1.365	1.366	1.353
51.75	1.067	1.092	1.064	1.075	1.086	1.077	0.645	0.734	0.95	0.977	0.971	0.942	1.106	1.084	1.091	0.62	0.634	0.631		51.75	1.098	1.01	1.032	1.068	1.011	1.033	1.222	1.344	1.296	0.899	0.873	0.604	0.173	0.204	0.206	0.762	0.669	0.572		51.75	1.447	1.488	1.394	1.332	1.337	1.321	1.349	1.359	1.345
52	1.068	1.099	1.075	1.102	1.111	1.099	0.647	0.735	0.953	0.988	0.981	0.962	1.123	1.108	1.111	0.616	0.631	0.629		52	1.111	1.023	1.053	1.077	1.017	1.037	1.224	1.347	1.293	0.902	0.87	0.608	0.174	0.205	0.208	0.769	0.67	0.576		52	1.441	1.488	1.395	1.345	1.341	1.32	1.362	1.361	1.349
52.25	1.082	1.11	1.08	1.091	1.097	1.083	0.653	0.739	0.954	0.981	0.975	0.952	1.116	1.1	1.102	0.616	0.631	0.628		52.25	1.123	1.028	1.053	1.066	1.01	1.027	1.229	1.346	1.305	0.904	0.868	0.606	0.176	0.208	0.217	0.792	0.668	0.571		52.25	1.447	1.493	1.402	1.362	1.356	1.344	1.358	1.373	1.37
52.5	1.092	1.118	1.089	1.102	1.11	1.093	0.67	0.742	0.957	0.989	0.982	0.966	1.124	1.103	1.108	0.614	0.63	0.627		52.5	1.12	1.03	1.053	1.073	1.013	1.032	1.23	1.341	1.298	0.903	0.865	0.607	0.178	0.208	0.209	0.798	0.664	0.566		52.5	1.427	1.482	1.405	1.364	1.356	1.34	1.36	1.375	1.369
52.75	1.09	1.113	1.084	1.097	1.102	1.09	0.654	0.748	0.963	0.981	0.975	0.957	1.117	1.101	1.103	0.614	0.629	0.627		52.75	1.139	1.044	1.067	1.066	1.01	1.027	1.226	1.337	1.309	0.902	0.867	0.602	0.18	0.208	0.213	0.798	0.666	0.564		52.75	1.436	1.493	1.411	1.361	1.367	1.352	1.361	1.37	1.366
53	1.089	1.12	1.094	1.119	1.127	1.11	0.654	0.752	0.961	1	0.995	0.98	1.14	1.114	1.123	0.614	0.628	0.625		53	1.109	1.029	1.043	1.071	1.016	1.032	1.229	1.339	1.313	0.904	0.868	0.603	0.181	0.209	0.216	0.809	0.661	0.56		53	1.435	1.485	1.4	1.339	1.349	1.327	1.352	1.354	1.348
53.25	1.074	1.1	1.07	1.082	1.089	1.072	0.656	0.758	0.961	0.977	0.97	0.946	1.113	1.093	1.096	0.614	0.629	0.624		53.25	1.092	1.003	1.016	1.066	1.007	1.025	1.223	1.336	1.305	0.9	0.862	0.602	0.182	0.209	0.216	0.807	0.661	0.56		53.25	1.42	1.478	1.387	1.328	1.335	1.311	1.353	1.344	1.334
53.5	1.07	1.095	1.064	1.098	1.108	1.095	0.656	0.766	0.971	0.98	0.975	0.954	1.123	1.101	1.106	0.612	0.625	0.623		53.5	1.089	1	1.017	1.071	1.011	1.028	1.225	1.336	1.305	0.9	0.859	0.601	0.183	0.21	0.218	0.807	0.661	0.56		53.5	1.408	1.48	1.388	1.327	1.332	1.316	1.349	1.347	1.345
53.75	1.075	1.102	1.069	1.105	1.114	1.099	0.664	0.772	0.975	0.984	0.98	0.959	1.121	1.1	1.107	0.611	0.625	0.622		53.75	1.122	1.039	1.059	1.07	1.008	1.025	1.224	1.336	1.3	0.898	0.861	0.6	0.186	0.21	0.219	0.813	0.658	0.557		53.75	1.413	1.481	1.39	1.324	1.33	1.318	1.353	1.351	1.35
54	1.083	1.109	1.072	1.099	1.108	1.093	0.666	0.781	0.98	0.973	0.969	0.942	1.112	1.097	1.096	0.611	0.623	0.621		54	1.099	1.017	1.031	1.062	1.005	1.023	1.219	1.332	1.302	0.898	0.859	0.597	0.184	0.211	0.218	0.81	0.658	0.556		54	1.416	1.479	1.387	1.32	1.322	1.307	1.34	1.346	1.337
54.25	1.073	1.099	1.064	1.097	1.103	1.09	0.668	0.789	0.98	0.978	0.975	0.955	1.123	1.103	1.107	0.61	0.622	0.62		54.25	1.088	0.996	1.013	1.064	1.007	1.023	1.222	1.333	1.3	0.901	0.859	0.597	0.186	0.211	0.219	0.818	0.654	0.556		54.25	1.417	1.479	1.386	1.324	1.333	1.314	1.332	1.354	1.34
54.5	1.08	1.105	1.065	1.09	1.097	1.083	0.672	0.792	0.987	0.971	0.969	0.944	1.113	1.096	1.098	0.611	0.621	0.619		54.5	1.089	1.001	1.014	1.064	1.002	1.018	1.221	1.329	1.297	0.899	0.858	0.596	0.186	0.212	0.219	0.821	0.652	0.554		54.5	1.42	1.478	1.384	1.319	1.328	1.313	1.334	1.346	1.339
54.75	1.083	1.108	1.069	1.094	1.101	1.086	0.687	0.804	0.992	0.972	0.971	0.95	1.115	1.095	1.1	0.608	0.62	0.617		54.75	1.1	1.017	1.033	1.061	1.005	1.02	1.217	1.326	1.301	0.9	0.857	0.596	0.188	0.212	0.222	0.82	0.653	0.555		54.75	1.413	1.474	1.38	1.313	1.33	1.305	1.328	1.338	1.336
55	1.106	1.132	1.092	1.113	1.122	1.107	0.692	0.81	0.999	0.978	0.977	0.962	1.122	1.104	1.11	0.607	0.62	0.616		55	1.124	1.048	1.064	1.074	1.011	1.026	1.218	1.326	1.301	0.898	0.857	0.597	0.189	0.212	0.224	0.818	0.652	0.555		55	1.412	1.469	1.375	1.307	1.321	1.29	1.329	1.332	1.326
55.25	1.093	1.119	1.079	1.106	1.113	1.096	0.692	0.816	1.002	0.974	0.973	0.957	1.118	1.101	1.104	0.607	0.619	0.618		55.25	1.116	1.039	1.055	1.068	1.006	1.019	1.216	1.325	1.296	0.898	0.856	0.597	0.189	0.213	0.225	0.822	0.65	0.554		55.25	1.41	1.474	1.379	1.311	1.319	1.302	1.342	1.34	1.337
55.5	1.091	1.114	1.071	1.107	1.116	1.101	0.692	0.831	1.001	0.977	0.978	0.962	1.126	1.105	1.112	0.608	0.617	0.614		55.5	1.1	1.014	1.032	1.071	1.007	1.023	1.226	1.333	1.309	0.898	0.861	0.593	0.191	0.215	0.225	0.831	0.652	0.555		55.5	1.408	1.476	1.384	1.322	1.333	1.314	1.35	1.347	1.343
55.75	1.095	1.116	1.07	1.083	1.088	1.074	0.694	0.842	1.01	0.962	0.963	0.938	1.105	1.09	1.089	0.607	0.617	0.613		55.75	1.1	1.022	1.033	1.066	1.002	1.018	1.218	1.323	1.305	0.896	0.859	0.588	0.192	0.216	0.225	0.829	0.651	0.555		55.75	1.408	1.476	1.373	1.305	1.316	1.302	1.337	1.333	1.337
56	1.098	1.116	1.072	1.081	1.086	1.072	0.696	0.848	1.018	0.958	0.958	0.937	1.103	1.088	1.087	0.606	0.616	0.613		56	1.108	1.028	1.043	1.071	1.001	1.018	1.217	1.321	1.305	0.894	0.855	0.589	0.193	0.216	0.224	0.828	0.649	0.554		56	1.408	1.474	1.373	1.307	1.312	1.309	1.335	1.335	1.353
56.25	1.097	1.116	1.073	1.079	1.083	1.069	0.7	0.864	1.029	0.953	0.952	0.934	1.098	1.085	1.085	0.61	0.616	0.612		56.25	1.128	1.051	1.065	1.057	0.999	1.016	1.218	1.32	1.304	0.895	0.857	0.589	0.201	0.218	0.223	0.831	0.648	0.555		56.25	1.404	1.471	1.365	1.294	1.302	1.298	1.334	1.329	1.339
56.5	1.092	1.106	1.063	1.072	1.075	1.061	0.702	0.872	1.032	0.946	0.945	0.922	1.098	1.083	1.083	0.609	0.615	0.611		56.5	1.103	1.018	1.032	1.064	1.001	1.017	1.217	1.319	1.305	0.897	0.855	0.59	0.195	0.219	0.22	0.832	0.647	0.552		56.5	1.411	1.477	1.377	1.307	1.311	1.309	1.34	1.332	1.361
56.75	1.105	1.116	1.073	1.078	1.082	1.069	0.706	0.887	1.048	0.945	0.946	0.929	1.097	1.082	1.086	0.609	0.614	0.61		56.75	1.141	1.058	1.073	1.064	1.003	1.018	1.219	1.319	1.307	0.898	0.854	0.588	0.195	0.22	0.221	0.836	0.648	0.55		56.75	1.403	1.464	1.364	1.289	1.3	1.287	1.334	1.321	1.345
57	1.103	1.112	1.069	1.068	1.071	1.059	0.707	0.908	1.056	0.939	0.941	0.919	1.092	1.082	1.08	0.607	0.613	0.609		57	1.129	1.043	1.054	1.058	0.997	1.014	1.218	1.315	1.308	0.897	0.851	0.586	0.197	0.221	0.22	0.833	0.643	0.544		57	1.399	1.463	1.362	1.293	1.295	1.299	1.339	1.33	1.363
57.25	1.128	1.134	1.088	1.094	1.096	1.081	0.71	0.933	1.068	0.949	0.95	0.936	1.106	1.095	1.098	0.608	0.613	0.609		57.25	1.157	1.076	1.091	1.066	1.004	1.02	1.219	1.319	1.319	0.897	0.856	0.586	0.201	0.226	0.22	0.837	0.643	0.545		57.25	1.405	1.468	1.37	1.304	1.305	1.306	1.346	1.33	1.359
57.5	1.116	1.121	1.078	1.088	1.086	1.07	0.714	0.955	1.072	0.944	0.944	0.928	1.102	1.092	1.089	0.607	0.612	0.608		57.5	1.131	1.049	1.066	1.072	1.006	1.024	1.226	1.322	1.33	0.897	0.856	0.587	0.201	0.229	0.225	0.852	0.644	0.544		57.5	1.405	1.462	1.36	1.294	1.291	1.288	1.336	1.321	1.349
57.75	1.147	1.151	1.107	1.126	1.127	1.115	0.715	0.961	1.071	0.966	0.969	0.964	1.127	1.112	1.119	0.607	0.612	0.607		57.75	1.133	1.052	1.061	1.082	1.012	1.031	1.23	1.321	1.33	0.897	0.858	0.585	0.203	0.23	0.226	0.849	0.635	0.54		57.75	1.404	1.462	1.361	1.299	1.294	1.29	1.33	1.312	1.351
58	1.145	1.145	1.099	1.111	1.11	1.093	0.717	0.964	1.08	0.961	0.964	0.956	1.118	1.101	1.108	0.607	0.611	0.607		58	1.157	1.079	1.088	1.075	1.007	1.028	1.227	1.32	1.331	0.895	0.858	0.586	0.206	0.233	0.225	0.851	0.635	0.54		58	1.4	1.459	1.359	1.298	1.291	1.285	1.321	1.309	1.341
58.25	1.158	1.154	1.106	1.114	1.108	1.089	0.721	0.968	1.089	0.959	0.96	0.951	1.12	1.108	1.111	0.606	0.61	0.606		58.25	1.191	1.101	1.113	1.063	1.002	1.023	1.222	1.314	1.329	0.895	0.859	0.582	0.206	0.234	0.224	0.849	0.634	0.538		58.25	1.392	1.45	1.347	1.278	1.275	1.271	1.314	1.298	1.32
58.5	1.133	1.128	1.085	1.094	1.087	1.068	0.721	0.969	1.09	0.945	0.947	0.932	1.108	1.096	1.096	0.603	0.608	0.604		58.5	1.16	1.074	1.082	1.061	0.996	1.017	1.225	1.311	1.321	0.893	0.854	0.581	0.205	0.234	0.224	0.847	0.633	0.538		58.5	1.386	1.446	1.34	1.268	1.271	1.267	1.312	1.294	1.309
58.75	1.132	1.124	1.08	1.092	1.085	1.069	0.725	0.976	1.089	0.943	0.944	0.928	1.109	1.098	1.097	0.602	0.61	0.603		58.75	1.146	1.06	1.071	1.071	1.001	1.02	1.221	1.311	1.323	0.893	0.849	0.584	0.208	0.237	0.224	0.851	0.631	0.538		58.75	1.389	1.447	1.349	1.275	1.279	1.287	1.32	1.304	1.311
59	1.14	1.132	1.089	1.093	1.086	1.071	0.726	0.975	1.098	0.943	0.944	0.931	1.112	1.099	1.098	0.608	0.613	0.603		59	1.141	1.065	1.078	1.068	1	1.017	1.224	1.312	1.32	0.893	0.846	0.585	0.21	0.239	0.224	0.85	0.625	0.538		59	1.39	1.449	1.355	1.283	1.283	1.294	1.322	1.31	1.317
59.25	1.136	1.127	1.083	1.084	1.078	1.063	0.728	0.979	1.106	0.94	0.941	0.927	1.105	1.092	1.094	0.607	0.606	0.603		59.25	1.137	1.059	1.071	1.066	0.997	1.017	1.219	1.311	1.317	0.892	0.846	0.585	0.218	0.242	0.225	0.849	0.626	0.538		59.25	1.391	1.446	1.351	1.286	1.28	1.288	1.317	1.307	1.303
59.5	1.108	1.099	1.054	1.078	1.078	1.07	0.728	0.98	1.108	0.939	0.941	0.93	1.114	1.097	1.105	0.602	0.605	0.6		59.5	1.126	1.033	1.045	1.07	0.998	1.017	1.219	1.31	1.316	0.893	0.845	0.581	0.221	0.243	0.224	0.847	0.625	0.539		59.5	1.391	1.447	1.356	1.287	1.283	1.298	1.318	1.31	1.316
59.75	1.145	1.137	1.086	1.09	1.086	1.07	0.731	0.991	1.119	0.94	0.944	0.931	1.108	1.096	1.098	0.6	0.604	0.6		59.75	1.152	1.079	1.089	1.066	1.003	1.018	1.221	1.314	1.318	0.894	0.847	0.581	0.218	0.246	0.225	0.851	0.627	0.539		59.75	1.382	1.437	1.333	1.261	1.265	1.267	1.305	1.291	1.287
60	1.155	1.145	1.093	1.118	1.119	1.101	0.735	0.998	1.127	0.955	0.959	0.955	1.126	1.115	1.116	0.599	0.603	0.599		60	1.141	1.063	1.072	1.082	1.014	1.025	1.226	1.318	1.332	0.897	0.846	0.584	0.219	0.251	0.227	0.85	0.625	0.537		60	1.387	1.441	1.34	1.269	1.267	1.276	1.307	1.288	1.288
60.25	1.153	1.143	1.085	1.082	1.08	1.063	0.736	1.002	1.134	0.934	0.938	0.923	1.1	1.095	1.088	0.599	0.603	0.603		60.25	1.145	1.07	1.078	1.071	1.008	1.02	1.217	1.31	1.33	0.891	0.847	0.58	0.215	0.25	0.227	0.848	0.626	0.536		60.25	1.389	1.454	1.348	1.287	1.281	1.303	1.312	1.3	1.304
60.5	1.17	1.159	1.1	1.094	1.087	1.069	0.742	1.007	1.14	0.939	0.943	0.936	1.11	1.103	1.102	0.599	0.604	0.599		60.5	1.18	1.103	1.117	1.07	1.006	1.018	1.225	1.318	1.327	0.894	0.85	0.58	0.219	0.254	0.229	0.849	0.625	0.534		60.5	1.384	1.445	1.341	1.275	1.272	1.292	1.306	1.298	1.289
60.75	1.183	1.169	1.11	1.098	1.082	1.06	0.74	1.011	1.142	0.946	0.949	0.946	1.12	1.112	1.113	0.597	0.602	0.6		60.75	1.192	1.109	1.122	1.075	1.005	1.018	1.224	1.316	1.327	0.895	0.846	0.583	0.217	0.257	0.229	0.85	0.625	0.535		60.75	1.377	1.444	1.339	1.285	1.275	1.303	1.305	1.296	1.295
61	1.158	1.147	1.094	1.084	1.072	1.052	0.742	1.01	1.146	0.939	0.941	0.938	1.112	1.103	1.103	0.596	0.601	0.597		61	1.158	1.08	1.097	1.069	1.002	1.016	1.215	1.307	1.323	0.891	0.844	0.577	0.215	0.257	0.228	0.845	0.622	0.533		61	1.369	1.438	1.334	1.263	1.267	1.294	1.293	1.291	1.289
61.25	1.159	1.145	1.085	1.075	1.069	1.05	0.748	1.022	1.151	0.925	0.927	0.919	1.094	1.091	1.085	0.596	0.6	0.6		61.25	1.186	1.108	1.123	1.066	0.999	1.013	1.214	1.307	1.32	0.888	0.839	0.578	0.214	0.259	0.228	0.848	0.622	0.534		61.25	1.363	1.432	1.32	1.252	1.258	1.279	1.282	1.284	1.281
61.5	1.16	1.147	1.088	1.076	1.065	1.047	0.754	1.029	1.164	0.923	0.925	0.923	1.097	1.091	1.088	0.596	0.599	0.596		61.5	1.197	1.121	1.134	1.067	1.003	1.015	1.214	1.305	1.318	0.89	0.839	0.581	0.214	0.262	0.229	0.849	0.623	0.533		61.5	1.364	1.433	1.318	1.263	1.267	1.285	1.289	1.286	1.29
61.75	1.151	1.139	1.081	1.081	1.072	1.054	0.751	1.028	1.157	0.922	0.923	0.92	1.103	1.098	1.094	0.596	0.598	0.6		61.75	1.171	1.099	1.115	1.067	1.003	1.014	1.216	1.305	1.313	0.889	0.84	0.578	0.211	0.262	0.23	0.849	0.623	0.533		61.75	1.363	1.428	1.313	1.253	1.266	1.287	1.287	1.279	1.283
62	1.16	1.149	1.086	1.067	1.058	1.039	0.764	1.044	1.175	0.914	0.915	0.909	1.09	1.086	1.082	0.598	0.597	0.598		62	1.199	1.12	1.136	1.066	0.999	1.011	1.215	1.301	1.319	0.887	0.839	0.574	0.212	0.264	0.231	0.848	0.622	0.527		62	1.357	1.427	1.307	1.241	1.248	1.273	1.274	1.28	1.265
62.25	1.164	1.154	1.093	1.072	1.061	1.045	0.754	1.034	1.158	0.926	0.927	0.929	1.106	1.097	1.101	0.598	0.598	0.594		62.25	1.2	1.122	1.139	1.06	0.997	1.009	1.218	1.303	1.318	0.891	0.838	0.577	0.211	0.266	0.231	0.848	0.622	0.53		62.25	1.349	1.426	1.306	1.243	1.258	1.271	1.278	1.278	1.269
62.5	1.165	1.157	1.098	1.107	1.099	1.081	0.755	1.034	1.163	0.941	0.941	0.95	1.124	1.115	1.118	0.594	0.596	0.592		62.5	1.158	1.085	1.102	1.073	1.004	1.017	1.213	1.302	1.322	0.89	0.84	0.574	0.211	0.268	0.232	0.849	0.621	0.528		62.5	1.346	1.423	1.302	1.237	1.26	1.267	1.278	1.279	1.27
62.75	1.179	1.167	1.104	1.085	1.073	1.053	0.767	1.054	1.181	0.927	0.926	0.931	1.101	1.097	1.096	0.596	0.597	0.593		62.75	1.214	1.142	1.157	1.073	1.006	1.018	1.215	1.304	1.321	0.895	0.843	0.575	0.216	0.273	0.237	0.854	0.621	0.527		62.75	1.349	1.424	1.307	1.236	1.267	1.275	1.277	1.281	1.261
63	1.162	1.155	1.097	1.076	1.065	1.047	0.761	1.044	1.166	0.922	0.921	0.924	1.102	1.098	1.095	0.591	0.603	0.591		63	1.181	1.108	1.12	1.068	1	1.012	1.214	1.303	1.32	0.895	0.84	0.577	0.215	0.276	0.237	0.855	0.623	0.529		63	1.342	1.421	1.307	1.232	1.271	1.271	1.286	1.284	1.272
63.25	1.188	1.177	1.115	1.095	1.08	1.059	0.772	1.064	1.188	0.933	0.931	0.943	1.111	1.108	1.109	0.592	0.609	0.601		63.25	1.229	1.153	1.165	1.08	1.012	1.019	1.215	1.306	1.324	0.899	0.845	0.574	0.216	0.28	0.239	0.856	0.624	0.53		63.25	1.341	1.419	1.307	1.233	1.27	1.282	1.28	1.279	1.277
63.5	1.17	1.157	1.096	1.055	1.043	1.022	0.782	1.067	1.188	0.91	0.908	0.911	1.083	1.083	1.076	0.591	0.602	0.599		63.5	1.224	1.14	1.148	1.076	1.003	1.012	1.21	1.299	1.319	0.896	0.838	0.571	0.215	0.279	0.239	0.854	0.621	0.524		63.5	1.335	1.416	1.301	1.226	1.258	1.273	1.28	1.272	1.267
63.75	1.162	1.156	1.099	1.073	1.06	1.043	0.785	1.076	1.198	0.914	0.911	0.923	1.098	1.094	1.091	0.59	0.604	0.6		63.75	1.216	1.139	1.15	1.073	1.007	1.014	1.216	1.303	1.318	0.894	0.836	0.576	0.215	0.282	0.241	0.855	0.623	0.527		63.75	1.327	1.413	1.299	1.215	1.251	1.264	1.276	1.266	1.266
64	1.165	1.159	1.103	1.078	1.064	1.048	0.789	1.073	1.193	0.913	0.91	0.919	1.101	1.097	1.093	0.597	0.604	0.599		64	1.198	1.116	1.127	1.078	1.008	1.015	1.21	1.297	1.317	0.895	0.838	0.572	0.215	0.282	0.24	0.853	0.621	0.525		64	1.333	1.417	1.303	1.231	1.25	1.283	1.276	1.272	1.269
64.25	1.155	1.154	1.099	1.078	1.066	1.051	0.795	1.079	1.193	0.912	0.91	0.919	1.1	1.096	1.092	0.589	0.602	0.587		64.25	1.192	1.121	1.131	1.073	1.006	1.012	1.212	1.298	1.313	0.897	0.836	0.574	0.215	0.281	0.241	0.854	0.621	0.526		64.25	1.323	1.415	1.307	1.226	1.248	1.276	1.287	1.277	1.271
64.5	1.163	1.16	1.106	1.078	1.066	1.05	0.807	1.091	1.205	0.914	0.912	0.924	1.101	1.096	1.096	0.589	0.607	0.592		64.5	1.208	1.138	1.147	1.084	1.007	1.014	1.209	1.293	1.31	0.895	0.835	0.57	0.215	0.286	0.242	0.853	0.619	0.525		64.5	1.335	1.424	1.317	1.239	1.264	1.295	1.287	1.283	1.285
64.75	1.172	1.175	1.122	1.101	1.087	1.069	0.81	1.095	1.209	0.925	0.922	0.944	1.114	1.109	1.11	0.59	0.598	0.588		64.75	1.231	1.155	1.167	1.092	1.014	1.019	1.213	1.299	1.31	0.897	0.836	0.574	0.214	0.287	0.243	0.853	0.621	0.528		64.75	1.328	1.417	1.305	1.225	1.245	1.266	1.278	1.275	1.268
65	1.179	1.178	1.125	1.091	1.073	1.055	0.812	1.1	1.211	0.924	0.921	0.943	1.11	1.104	1.107	0.591	0.607	0.599		65	1.223	1.142	1.153	1.078	1.005	1.012	1.205	1.29	1.301	0.891	0.832	0.575	0.214	0.292	0.245	0.852	0.625	0.533		65	1.324	1.413	1.304	1.225	1.247	1.262	1.274	1.276	1.263
65.25	1.19	1.177	1.125	1.087	1.064	1.044	0.816	1.101	1.196	0.922	0.918	0.938	1.105	1.102	1.104	0.59	0.603	0.598		65.25	1.248	1.171	1.178	1.084	1.007	1.013	1.21	1.294	1.301	0.895	0.836	0.579	0.215	0.297	0.249	0.854	0.625	0.535		65.25	1.332	1.427	1.315	1.252	1.268	1.311	1.288	1.291	1.305
65.5	1.173	1.166	1.112	1.065	1.045	1.028	0.819	1.102	1.192	0.91	0.905	0.922	1.095	1.092	1.09	0.59	0.607	0.594		65.5	1.229	1.148	1.153	1.067	0.998	1.005	1.202	1.288	1.295	0.89	0.833	0.57	0.215	0.297	0.249	0.852	0.623	0.528		65.5	1.331	1.42	1.313	1.245	1.263	1.285	1.276	1.297	1.301
65.75	1.178	1.17	1.119	1.085	1.064	1.045	0.833	1.118	1.208	0.918	0.914	0.939	1.105	1.102	1.104	0.587	0.607	0.587		65.75	1.255	1.173	1.177	1.074	1	1.008	1.206	1.289	1.295	0.894	0.835	0.572	0.215	0.299	0.25	0.851	0.618	0.528		65.75	1.314	1.412	1.295	1.234	1.242	1.27	1.276	1.282	1.294
66	1.168	1.161	1.11	1.065	1.047	1.029	0.831	1.111	1.187	0.906	0.902	0.922	1.093	1.091	1.091	0.588	0.608	0.586		66	1.24	1.157	1.162	1.08	0.999	1.006	1.207	1.288	1.292	0.89	0.831	0.572	0.215	0.304	0.252	0.853	0.62	0.529		66	1.312	1.406	1.281	1.219	1.235	1.256	1.267	1.268	1.289
66.25	1.166	1.165	1.118	1.083	1.065	1.048	0.842	1.127	1.205	0.911	0.905	0.927	1.102	1.1	1.097	0.586	0.606	0.583		66.25	1.242	1.158	1.165	1.081	1.002	1.009	1.205	1.286	1.292	0.892	0.831	0.573	0.215	0.305	0.252	0.854	0.621	0.532		66.25	1.307	1.402	1.276	1.216	1.23	1.253	1.26	1.261	1.279
66.5	1.158	1.159	1.11	1.068	1.049	1.032	0.844	1.121	1.187	0.903	0.899	0.922	1.094	1.093	1.092	0.585	0.606	0.583		66.5	1.235	1.152	1.156	1.08	0.997	1.005	1.203	1.286	1.288	0.892	0.827	0.576	0.216	0.307	0.255	0.855	0.617	0.529		66.5	1.304	1.409	1.278	1.232	1.241	1.271	1.269	1.265	1.277
66.75	1.156	1.16	1.114	1.075	1.058	1.042	0.855	1.131	1.198	0.907	0.902	0.926	1.103	1.1	1.098	0.584	0.605	0.581		66.75	1.226	1.144	1.152	1.086	0.999	1.006	1.205	1.284	1.286	0.892	0.828	0.572	0.215	0.31	0.255	0.852	0.613	0.528		66.75	1.305	1.404	1.27	1.222	1.236	1.262	1.262	1.255	1.268
67	1.153	1.151	1.105	1.058	1.041	1.024	0.868	1.139	1.196	0.895	0.891	0.91	1.084	1.084	1.082	0.587	0.604	0.58		67	1.246	1.164	1.168	1.074	0.997	1.004	1.2	1.282	1.284	0.889	0.826	0.573	0.215	0.309	0.255	0.851	0.613	0.527		67	1.302	1.403	1.262	1.216	1.23	1.259	1.254	1.256	1.261
67.25	1.147	1.148	1.106	1.065	1.049	1.032	0.881	1.146	1.207	0.893	0.89	0.907	1.085	1.088	1.081	0.586	0.603	0.58		67.25	1.235	1.156	1.158	1.073	0.994	1.001	1.198	1.279	1.28	0.887	0.827	0.57	0.215	0.309	0.256	0.852	0.612	0.527		67.25	1.299	1.407	1.271	1.224	1.237	1.274	1.264	1.257	1.265
67.5	1.187	1.181	1.138	1.094	1.073	1.058	0.886	1.148	1.207	0.916	0.913	0.949	1.108	1.103	1.105	0.587	0.604	0.58		67.5	1.228	1.152	1.152	1.091	1.008	1.015	1.201	1.281	1.285	0.893	0.83	0.568	0.216	0.313	0.257	0.85	0.612	0.529		67.5	1.302	1.403	1.276	1.229	1.239	1.274	1.259	1.266	1.266
67.75	1.162	1.156	1.117	1.078	1.057	1.043	0.904	1.16	1.21	0.901	0.899	0.925	1.094	1.093	1.091	0.582	0.603	0.578		67.75	1.237	1.164	1.159	1.073	0.997	1.003	1.198	1.28	1.281	0.885	0.829	0.568	0.216	0.319	0.26	0.852	0.617	0.533		67.75	1.305	1.412	1.283	1.248	1.26	1.285	1.271	1.272	1.281
68	1.137	1.141	1.108	1.084	1.07	1.057	0.903	1.149	1.204	0.907	0.907	0.936	1.107	1.106	1.104	0.581	0.603	0.578		68	1.203	1.128	1.123	1.072	0.994	1	1.198	1.278	1.278	0.889	0.83	0.565	0.217	0.323	0.262	0.852	0.615	0.53		68	1.306	1.407	1.278	1.238	1.25	1.285	1.27	1.265	1.284
68.25	1.176	1.17	1.137	1.089	1.068	1.052	0.913	1.156	1.204	0.914	0.912	0.948	1.107	1.107	1.108	0.583	0.603	0.582		68.25	1.234	1.161	1.159	1.077	0.999	1.006	1.2	1.28	1.275	0.892	0.832	0.57	0.217	0.326	0.264	0.856	0.616	0.532		68.25	1.294	1.391	1.257	1.202	1.231	1.243	1.248	1.245	1.252
68.5	1.152	1.139	1.104	1.046	1.026	1.009	0.93	1.16	1.2	0.887	0.885	0.906	1.073	1.076	1.071	0.584	0.602	0.577		68.5	1.24	1.162	1.158	1.066	0.992	0.999	1.195	1.275	1.269	0.885	0.824	0.57	0.217	0.329	0.265	0.853	0.614	0.532		68.5	1.289	1.397	1.268	1.223	1.245	1.272	1.258	1.25	1.259
68.75	1.137	1.127	1.096	1.064	1.048	1.031	0.947	1.165	1.2	0.883	0.881	0.903	1.081	1.082	1.078	0.583	0.601	0.58		68.75	1.212	1.14	1.134	1.083	0.994	1.001	1.197	1.276	1.266	0.885	0.826	0.568	0.218	0.331	0.267	0.853	0.612	0.53		68.75	1.293	1.392	1.262	1.225	1.239	1.263	1.247	1.244	1.25
69	1.136	1.131	1.1	1.069	1.05	1.033	0.947	1.158	1.193	0.885	0.883	0.91	1.084	1.086	1.083	0.583	0.601	0.577		69	1.219	1.144	1.14	1.069	0.99	0.996	1.198	1.272	1.265	0.885	0.827	0.566	0.219	0.334	0.268	0.852	0.612	0.528		69	1.292	1.395	1.269	1.236	1.247	1.275	1.255	1.254	1.258
69.25	1.165	1.15	1.12	1.075	1.055	1.038	0.961	1.165	1.199	0.902	0.896	0.933	1.093	1.092	1.093	0.579	0.601	0.577		69.25	1.24	1.166	1.164	1.081	1.001	1.003	1.195	1.271	1.262	0.89	0.827	0.571	0.22	0.34	0.271	0.851	0.611	0.529		69.25	1.296	1.386	1.263	1.218	1.237	1.267	1.244	1.247	1.245
69.5	1.163	1.144	1.115	1.073	1.05	1.032	0.958	1.156	1.185	0.893	0.889	0.921	1.089	1.088	1.09	0.579	0.601	0.576		69.5	1.247	1.169	1.164	1.074	0.994	0.999	1.198	1.274	1.262	0.883	0.825	0.568	0.219	0.343	0.272	0.852	0.614	0.531		69.5	1.281	1.381	1.254	1.212	1.23	1.249	1.235	1.242	1.228
69.75	1.147	1.128	1.098	1.059	1.038	1.019	0.967	1.155	1.182	0.886	0.882	0.908	1.079	1.08	1.076	0.577	0.599	0.579		69.75	1.243	1.167	1.157	1.077	0.992	0.998	1.191	1.268	1.256	0.882	0.823	0.571	0.22	0.345	0.272	0.851	0.61	0.529		69.75	1.282	1.379	1.25	1.21	1.222	1.251	1.241	1.239	1.237
70	1.144	1.121	1.09	1.087	1.068	1.053	0.989	1.171	1.187	0.899	0.895	0.928	1.099	1.098	1.098	0.577	0.598	0.577		70	1.215	1.139	1.129	1.077	0.994	0.998	1.194	1.267	1.255	0.884	0.826	0.569	0.22	0.348	0.273	0.85	0.609	0.529		70	1.287	1.378	1.253	1.219	1.225	1.257	1.242	1.241	1.242
70.25	1.15	1.126	1.096	1.064	1.042	1.024	0.997	1.172	1.188	0.889	0.887	0.918	1.083	1.084	1.084	0.576	0.598	0.574		70.25	1.247	1.174	1.168	1.072	0.992	0.997	1.194	1.267	1.255	0.881	0.823	0.57	0.221	0.356	0.276	0.853	0.613	0.531		70.25	1.279	1.371	1.249	1.206	1.215	1.247	1.236	1.234	1.235
70.5	1.142	1.118	1.088	1.057	1.038	1.024	1.007	1.176	1.184	0.884	0.88	0.909	1.078	1.078	1.078	0.582	0.597	0.573		70.5	1.236	1.161	1.153	1.071	0.99	0.993	1.194	1.266	1.249	0.884	0.826	0.568	0.222	0.359	0.278	0.851	0.608	0.528		70.5	1.286	1.377	1.25	1.215	1.228	1.261	1.242	1.241	1.249
70.75	1.158	1.134	1.108	1.08	1.057	1.043	1.017	1.178	1.184	0.891	0.889	0.93	1.094	1.093	1.097	0.583	0.597	0.574		70.75	1.265	1.195	1.188	1.081	0.997	0.998	1.197	1.267	1.249	0.886	0.827	0.569	0.223	0.365	0.281	0.851	0.608	0.53		70.75	1.278	1.376	1.247	1.215	1.229	1.259	1.25	1.24	1.249
71	1.16	1.138	1.11	1.088	1.067	1.055	1.016	1.176	1.18	0.901	0.9	0.945	1.106	1.102	1.107	0.579	0.598	0.579		71	1.228	1.16	1.147	1.08	0.998	1.001	1.198	1.268	1.248	0.89	0.831	0.575	0.224	0.374	0.284	0.851	0.611	0.532		71	1.272	1.364	1.243	1.199	1.217	1.242	1.231	1.231	1.236
71.25	1.14	1.117	1.088	1.066	1.043	1.028	1.017	1.171	1.173	0.885	0.883	0.918	1.084	1.083	1.083	0.582	0.596	0.572		71.25	1.24	1.167	1.156	1.081	0.994	0.999	1.194	1.264	1.245	0.884	0.823	0.578	0.224	0.375	0.284	0.852	0.612	0.532		71.25	1.273	1.362	1.244	1.203	1.228	1.256	1.24	1.232	1.239
71.5	1.136	1.111	1.082	1.052	1.028	1.013	1.006	1.154	1.164	0.876	0.874	0.906	1.075	1.076	1.075	0.582	0.595	0.571		71.5	1.236	1.158	1.148	1.074	0.989	0.993	1.191	1.261	1.241	0.881	0.823	0.573	0.225	0.382	0.287	0.852	0.61	0.529		71.5	1.268	1.361	1.235	1.198	1.215	1.249	1.242	1.228	1.254
[truncated: 83 more columns]

## Sheet: Fig1_Performance_Calcs
	KT2440	SYK6	B1D3A	JMN2	F199	PD630	NBRC0880										Average Lag Performance Score 10% Mock APL
Lag Times (10% Mock APL), h										Performance Scores, Lag Times (10% Mock APL)
	Average	Average	Average	Average	Average	Average	Average			KT2440	SYK6	B1D3A	JMN2	F199	PD630	NBRC0880
M9	4.69151	5.33272	36.2023	8.91564	12.9535	11.3043	9.55546		M9	0.95056	0.920114	0.777038	0.667854	0.577628	1	0.761638	0.807833
RM	4.45957	4.90671	31.2678	6.06502	8.14744	15.8742	9.74988		RM	1	1	0.899665	0.981753	0.918359	0.712119	0.746451	0.894049		Average Media Performance Score 10% Mock APL
MM457	4.70588	5.30153	28.1306	5.95435	7.48227	18.6133	8.79025		MM457	0.947658	0.925527	1	1	1	0.607322	0.82794	0.901207
Wx	5.21624	5.15556	33.4584	6.69521	8.68137	12.7298	9.34768		Wx	0.854939	0.951731	0.840762	0.889344	0.861878	0.888019	0.778568	0.866463
SD	6.30754	8.31923	49.175	14.5675	28.6287	16.8973	7.2778		SD	0.707022	0.589803	0.57205	0.408742	0.261356	0.668997	1	0.601139		M9	0.790722
K3	4.99698	5.39112	58.538			13.9563	12.1309		K3	0.892453	0.910147	0.480552	0	0	0.809977	0.599939	0.527581		RM	0.878065
Minimum	4.45957	4.90671	28.1306	5.95435	7.48227	11.3043	7.2778												MM457	0.871587
																	Average Growth Rate Performance Score 10% Mock APL		Wx	0.858036
Maximum Absolute Growth Rate (10% MOCK APL), h-1										Performance Scores, Maximum Absolute Growth Rate (10% MOCK APL)									SD	0.581837
	Average	Average	Average	Average	Average	Average	Average			KT2440	SYK6	B1D3A	JMN2	F199	PD630	NBRC0880			K3	0.521977
M9	0.211223	0.159818	0.136278	0.247008	0.23047	0.054258	0.128693		M9	0.505674	0.845772	0.9414	0.823731	0.912922	0.385772	1	0.77361
RM	0.185223	0.171067	0.135283	0.299865	0.252453	0.118872	0.116613		RM	0.443429	0.905303	0.934527	1	1	0.845174	0.906133	0.862081
MM457	0.082904	0.185556	0.144761	0.287045	0.233785	0.140648	0.106817		MM457	0.198475	0.98198	1	0.957247	0.926054	1	0.830014	0.841967
Wx	0.231354	0.188961	0.13972	0.298763	0.228251	0.112609	0.093574		Wx	0.553868	1	0.965177	0.996325	0.904133	0.800644	0.72711	0.849608
SD	0.094274	0.145917	0.126055	0.102073	0.122504	0.087381	0.080065		SD	0.225695	0.772207	0.87078	0.340397	0.485255	0.621274	0.62214	0.562535
K3	0.417706	0.157951	0.102144			0.077708	0.066999		K3	1	0.835892	0.705604	0	0	0.5525	0.520611	0.516372
Maximum	0.417706	0.188961	0.144761	0.299865	0.252453	0.140648	0.128693
																	Average Lag Performance Score 25% Mock APL
Lag Times (25% Mock APL), h										Performance Scores, Lag Times (25% Mock APL)
	Average	Average	Average	Average	Average	Average	Average			KT2440	SYK6	B1D3A	JMN2	F199	PD630	NBRC0880
M9	6.02	19.1374				12.27	13.5666		M9	0.921927	0.668111	0	0	0	1	0.782776	0.481831
RM	5.77	14.9178		14.14	23.76	23.19	15.0126		RM	0.961872	0.857087	0	0.950544	0.873336	0.529107	0.70738	0.697047		Average Media Performance Score 25% Mock APL
MM457	6.59	13.3231		13.4407	20.7505	27.11	13.4917		MM457	0.842185	0.95968	0	1	1	0.452601	0.787122	0.720227
Wx	5.55	12.7859		19.0711	32.6749	22.82			Wx	1	1	0	0.704767	0.635058	0.537686	0	0.55393
SD	9.23						10.6196		SD	0.6013	0	0	0	0	0	1	0.228757		M9	0.420279
K3	6.62	19.8821				30.93	24.7573		K3	0.838369	0.643084	0	0	0	0.396702	0.428949	0.329586		RM	0.72624
Minimum	5.55	12.7859	0	13.4407	20.7505	12.27	10.6196												MM457	0.694617
																	Average Growth Rate Performance Score 5% Mock APL		Wx	0.572039
Maximum Absolute Growth Rate (25% MOCK APL), h-1										Performance Scores, Maximum Absolute Growth Rate (25% MOCK APL)									SD	0.201375
	Average	Average	Average	Average	Average	Average	Average			KT2440	SYK6	B1D3A	JMN2	F199	PD630	NBRC0880			K3	0.335466
M9	0.41	0.205772				0.07	0.17962		M9	0.525641	0.85992	0	0	0	0.241379	0.884157	0.358728
RM	0.69	0.239292		0.198378	0.175737	0.23	0.159357		RM	0.884615	1	0	0.949014	0.876883	0.793103	0.784415	0.755433
MM457	0.14	0.170189		0.209036	0.200411	0.29	0.160969		MM457	0.179487	0.711219	0	1	1	1	0.79235	0.669008
Wx	0.78	0.16148		0.156336	0.148865	0.28			Wx	1	0.674824	0	0.74789	0.742799	0.965517	0	0.590147
SD	0.17						0.203154		SD	0.217949	0	0	0	0	0	1	0.173993
K3	0.6	0.035909				0.24	0.130534		K3	0.769231	0.150064	0	0	0	0.827586	0.642537	0.341345
Maximum	0.78	0.239292	0	0.209036	0.200411	0.29	0.203154

## Sheet: Fig2_GR
Mock APL (%)	P. putida KT2440			S. lignivorans SYK-6			S. lignivorans B1D3A			N. aromaticivorans JMN2			N. aromaticivorans F199			R. opacus PD630			R. toruloides NBRC0880
10	0.22	0.22	0.28	0.141006	0.152802	0.148315	0.1	0.1	0.11	0.304485	0.30428	0.290839	0.238668	0.243579	0.275112	0.130559	0.057104	0.168954	0.01	0.0102	0.0087
25	0.65	0.7	0.72	0.194533	0.198392	0.163778				0.197287	0.19521	0.202636	0.176344	0.177339	0.173529	0.184822	0.236421	0.279962	0.0107	0.011	0.0106
50	0.45	0.47	0.48													0.089931	0.102725	0.104708	0.0079	0.0074	0.0075
75	0.52	0.56	0.56																0.0051	0.0072	0.0086
100	0.58943	0.542014	0.566126																0.006	0.0061	0.007
Ferulate (mM)	P. putida KT2440			Sphingobium sp. SYK-6			S. lignovorans B1D3A			N. aromaticivorans JMN2			N. aromaticivorans F199			R. opacus PD630			R. toruloides NBRC0880
5	0.47	0.54	0.6	0.181022	0.201409	0.186103	0.163192	0.154826	0.149737	0.227525	0.218083	0.22416	0.189704	0.1921	0.176285	0.13	0.02	0.04
25	0.71	0.67	0.67													0.02	0.02	0.01	0.0635	0.0769	0.0636
50	0.44	0.45	0.44													0.01	0.02	0.01	0.0707	0.0755	0.0736
75	0.41	0.41	0.43													0.01	0.01	0.01	0.0753	0.0483	0.0443
100	0.37	0.37	0.35													0.01	0.01	0.01
Vanillate (mM)	P. putida KT2440			Sphingobium sp. SYK-6			S. lignovorans B1D3A			N. aromaticivorans JMN2			N. aromaticivorans F199			R. opacus PD630			R. toruloides NBRC0880
5	0.12	0.14	0.15	0.175719	0.173686	0.175852	0.197388	0.175632	0.172961	0.270183	0.271564	0.270788	0.172063	0.172651	0.187244	0.218422	0.021667	0.019617
25	0.86	0.85	0.91	0.019314	0.013056	0.013738	0.06	0.05	0.05	0.138018	0.141011	0.138988				0.300517	0.26613	0.309464	0.3947	0.3827	0.4465
50	0.69	0.65	0.67
75	0.48	0.51	0.52
100	0.14	0.16	0.25
Syringate (mM)	P. putida KT2440			Sphingobium sp. SYK-6			S. lignovorans B1D3A			N. aromaticivorans JMN2			N. aromaticivorans F199			R. opacus PD630			R. toruloides NBRC0880
5				0.195541	0.195791	0.199665	0.216262	0.201926	0.190216	0.065134	0.068181	0.081784	0.096991	0.103351	0.117704
25				0.12859	0.123666	0.124445	0.130616	0.170037	0.181643
50
75
100
p-Coumarate (mM)	P. putida KT2440			Sphingobium sp. SYK-6			S. lignovorans B1D3A			N. aromaticivorans JMN2			N. aromaticivorans F199			R. opacus PD630			R. toruloides NBRC0880
5	0.66	0.61	0.63	0.069816	0.095537	0.095156	0.146762	0.122392	0.122496	0.265106	0.251898	0.249611	0.272541	0.284512	0.285167	0.039131	0.042547	0.037692	0.0071	0.0089	0.0131
25	0.93	0.93	0.85													0.181395	0.145979	0.191064	0.0327	0.0308	0.0279
50	0.74	0.74	0.76																0.0357	0.039	0.0398
75	0.51	0.52	0.53																0.044	0.0453	0.0445
100	0.49	0.5	0.52																0.0394	0.041	0.04
4HB (mM)	P. putida KT2440			Sphingobium sp. SYK-6			S. lignovorans B1D3A			N. aromaticivorans JMN2			N. aromaticivorans F199			R. opacus PD630			R. toruloidesNBRC0880
5	0.19	0.19	0.21	0.0744	0.077904	0.083493	0.06221	0.061865	0.067805	0.198201	0.203885	0.183191	0.219726	0.211044	0.213356	0.04412	0.04537	0.046643	0.178	0.181	0.171
25	0.99	0.98	1				0.036163	0.034591	0.035947	0.145685	0.140623	0.135153	0.140189	0.140778	0.135498	0.305965	0.310155	0.312619	0.16	0.159	0.154
50	0.87	0.76	0.79													0.283151	0.273942	0.278251	0.183	0.18	0.179
75	0.62	0.63	0.61													0.280044	0.281955	0.287187	0.172	0.179	0.166
100	0.79	0.62	0.66													0.375666	0.336453	0.40423	0.176	0.174	0.174
Acetate (mM)	P. putida KT2440			Sphingobium sp. SYK-6			S. lignovorans B1D3A			N. aromaticivorans JMN2			N. aromaticivorans F199			R. opacus PD630			R. toruloidesNBRC0880
10	0.03	0.02	0.03	0.004138	0.004628	0.004542	0.063017	0.061822	0.059788	0.163806	0.157684	0.135974	0.138536	0.131816	0.147573	0.032787	0.029746	0.03306
25	0.17	0.14	0.18	0.002682	0.002623	0.002699	0.0765	0.077192	0.075374	0.205469	0.202625	0.20718	0.180987	0.182594	0.18373	0.041489	0.048982	0.04808	0.2996	0.3649	0.2875
50	0.26	0.23	0.28				0.06208	0.050684	0.048494	0.177516	0.163821	0.163999	0.171584	0.166675	0.15661	0.103948	0.107692	0.114102	0.269	0.193	0.181
75	0.38	0.47	0.49							0.112339	0.127762	0.133116	0.116659	0.138617	0.122617	0.100798	0.074992	0.092274	0.15	0.169	0.173
100	0.43	0.4	0.41										0.017577	0.042077	0.022447	0.10873	0.10168	0.085832	0.149	0.147	0.159
Lactate (mM)	P. putida KT2440			Sphingobium sp. SYK-6			S. lignovorans B1D3A			N. aromaticivorans JMN2			N. aromaticivorans F199			R. opacus PD630			R. toruloides NBRC0880
10	0.61	0.66	0.63							0.097622	0.079013	0.092815				0.045654	0.041656	0.038093
25	0.78	0.86	0.91							0.178541	0.183834	0.176321	0.05558	0.031414	0.064249	0.174871	0.156122	0.17202
50	0.78	0.8	0.78							0.162438	0.170172	0.160219	0.123136	0.107562	0.104429	0.241375	0.221757	0.225192
75	0.7	0.71	0.69							0.156257	0.165667	0.143668	0.121214	0.125127	0.134796	0.216481	0.204996	0.193297
100	0.67	0.68	0.65							0.087724	0.05717		0.105103	0.08517	0.118989	0.211447	0.181434	0.163526
vanillin (mM)	P. putida KT2440			Sphingobium sp. SYK-6			S. lignovorans B1D3A			N. aromaticivorans JMN2			N. aromaticivorans F199			R. opacus PD630			R. toruloides NBRC0880
5	0.177155	0.19899	0.203943	0.151882	0.157901	0.143764	0.14284	0.137756	0.141322	0.288953	0.284865	0.302276	0.140039	0.209334	0.147048	0.79951	0.338076	0.651154
10	0.3187	0.316827	0.312477	0.640058	0.622816	0.657533	0.61401	0.57124	0.624201	0.904642	0.881404	0.885665	0.700373	0.700236	0.658434	1.07494	1.00871	0.99104
15	0.430597	0.452798	0.342341	0.672274	0.657417	0.679852	0.641857	0.599394	0.609266	0.917253	0.837254	0.915305	0.763105	0.822999	0.786678	0.884674	0.798558	0.726137
25	0.577563	0.544302	0.523056				0.808409	0.726245	0.831688
50
4Hbald (mM)	P. putida KT2440			Sphingobium sp. SYK-6			S. lignovorans B1D3A			N. aromaticivorans JMN2			N. aromaticivorans F199			R. opacus PD630			R. toruloides NBRC0880
5	0.282546	0.305044	0.301949	0.440066	0.462802	0.399071	0.229294	0.230319	0.231487	0.200421	0.29449	0.325874	0.126905	0.184329	0.219899	0.213058	0.22037	0.215811	0.07	0.07	0.07
10	0.542009	0.565714	0.533337	0.64591	0.590489	0.622421	0.455182	0.553941	0.574515
15
25
50

## Sheet: Fig2_Lag
Lag (h)																							Δlag(h)
Mock APL (%)	P. putida KT2440			S. lignivorans SYK-6			S. lignivorans B1D3A			N. aromaticivorans JMN2			N. aromaticivorans F199			R. opacus PD630			R. toruloides NBRC0880				Mock APL (%)	P. putida KT2440			S. lignivorans SYK-6			S. lignivorans B1D3A			N. aromaticivorans JMN2			N. aromaticivorans F199			R. opacus PD630			R. toruloides NBRC0880
10	4.86	5.16	5.02	3.65919	4.39633	2.55107	30.22	30.32	30.06	6.19124	6.49976	5.50469	7.82904	7.90734	8.70595	18.0395	11.0533	18.5297	12.5126	12.5969	13.0957		10	0	0	0	0	0	0	0	0	0	0	0	0	0	0	0	0	0	0	0	0	0
25	5.43724	6.19987	5.69374	14.0546	14.2185	10.8974				14.8801	14.7872	12.7488	23.0674	22.4029	25.8176	22.266	22.31	25.0084	14.0177	13.5127	12.9637		25	0.577238	1.03987	0.673743	10.3954	9.82214	8.3463				8.68888	8.28739	7.24408	15.2384	14.4955	17.1116	4.22651	11.2567	6.47868	1.5051	0.91582	-0.132
50	5.69	5.52	6.13													30.8855	27.8408	28.7366	13.2436	13.1379	9.8189		50	0.83	0.36	1.11													12.846	16.7875	10.2069	0.73094	0.541	-3.27684
75	7.26	8.27	7.89																13.5409	12.8798	12.9444		75	2.4	3.11	2.87																1.02824	0.28291	-0.15136
100	9.22	11.02	10.81																14.1392	14.129	14.7233		100	4.36	5.86	5.79																1.62656	1.53213	1.62755
Ferulate (mM)	P. putida KT2440			Sphingobium sp. SYK-6			S. lignovorans B1D3A			N. aromaticivorans JMN2			N. aromaticivorans F199			R. opacus PD630			R. toruloides NBRC0880				Ferulate (mM)	P. putida KT2440			S. lignivorans SYK-6			S. lignivorans B1D3A			N. aromaticivorans JMN2			N. aromaticivorans F199			R. opacus PD630			R. toruloides NBRC0880
5	9.74	9.72	9.65	6.8495	6.51825	6.7583	7.43135	7.4365	7.23254	16.3543	16.4192	16.4786	25.3632	26.0385	26.2217	68.83	38.4	47.71					5	0	0	0	0	0	0	0	0	0	0	0	0	0	0	0	0	0	0
25	11.56	11.65	11.56													100	100	100	46.94	46.99	44.75		25	1.82	1.93	1.91													31.17	61.6	52.29	0	0	0
50	11.6	11.86	11.53													91.59	100	100	47.88	46.61	47.08		50	1.86	2.14	1.88													22.76	61.6	52.29	0.94	-0.38	2.33
75	12.15	12.51	12.48													83.5	92.23	96.85	87.28	87.41	87.64		75	2.41	2.79	2.83													14.67	53.83	49.14	40.34	40.42	42.89
100	13.13	12.84	12.91													100	100	100					100	3.39	3.12	3.26													31.17	61.6	52.29
Vanillate (mM)	P. putida KT2440			Sphingobium sp. SYK-6			S. lignovorans B1D3A			N. aromaticivorans JMN2			N. aromaticivorans F199			R. opacus PD630			R. toruloides NBRC0880				Vanillate (mM)	P. putida KT2440			Sphingobium sp. SYK-6			S. lignovorans B1D3A			N. aromaticivorans JMN2			N. aromaticivorans F199			R. opacus PD630			R. toruloides NBRC0880
5	8.81	9.13	8.96	8.59111	8.53522	8.53474	7.59744	7.40999	7.39527	10.0299	9.95848	9.9915	15.2192	15.1394	15.2415	21.2104	28.424	26.4034					5	0	0	0	0	0	0	0	0	0	0	0	0	0	0	0	0	0	0
25	19.12	19.08	19.27	100	100	100	100	90.22	79.44	93.1229	93.6174	93.5299				70.66	74.2648	70.4547	35.58	43.75	37.41		25	10.31	9.95	10.31	91.4089	91.4648	91.4653	92.4026	82.81	72.0447	83.093	83.6589	83.5384				49.4496	45.8407	44.0513	0	0	0
50	22.51	22.75	22.61																				50	13.7	13.62	13.65
75	26.88	26.94	26.43																				75	18.07	17.81	17.47
100	71.4	60.3	45.06																				100	62.59	51.17	36.1
Syringate (mM)	P. putida KT2440			Sphingobium sp. SYK-6			S. lignovorans B1D3A			N. aromaticivorans JMN2			N. aromaticivorans F199			R. opacus PD630			R. toruloidesNBRC0880				Syringate (mM)	P. putida KT2440			S. lignivorans SYK-6			S. lignivorans B1D3A			N. aromaticivorans JMN2			N. aromaticivorans F199			R. opacus PD630			R. toruloides NBRC0880
5				3.89015	3.75345	3.61973	6.20968	6.05236	5.70228	36.1	36.8471	37.7346	41.3725	42.1874	42.0586								5				0	0	0	0	0	0	0	0	0	0	0	0
25				43.9312	43.8427	45.2297	81.0912	55.0457	59.6651														25				40.0411	40.0893	41.61	74.8815	48.9933	53.9628
50																							50
75																							75
100																							100
p-Coumarate (mM)	P. putida KT2440			Sphingobium sp. SYK-6			S. lignovorans B1D3A			N. aromaticivorans JMN2			N. aromaticivorans F199			R. opacus PD630			R. toruloides NBRC0880				p-Coumarate (mM)	P. putida KT2440			Sphingobium sp. SYK-6			S. lignovorans B1D3A			N. aromaticivorans JMN2			N. aromaticivorans F199			R. opacus PD630			R. toruloides NBRC0880
5	8.05	7.97	8.03	36.7952	36.4235	36.6581	18.5021	17.4023	17.7046	17.0898	16.9986	16.3603	12.1447	12.2437	12.2181	40.603	39.538	41.7922	5.55768	5.78303	5.32931		5	0	0	0	0	0	0	0	0	0	0	0	0	0	0	0	0	0	0	0	0	0
25	10.61	10.72	10.54													64.7456	65.5375	64.3338	26.5677	26.0892	26.4879		25	2.56	2.75	2.51													24.1426	25.9995	22.5416	21.0101	20.3062	21.1586
50	12.88	13.08	13.11																34.0305	33.9706	33.8462		50	4.83	5.11	5.08																28.4728	28.1876	28.5169
75	15.06	14.8	14.67																39.4407	39.0116	39.4699		75	7.01	6.83	6.64																33.883	33.2286	34.1406
100	17.96	17.97	17.89																45.1162	45.5989	44.7187		100	9.91	10	9.86																39.5585	39.8158	39.3894
4HB (mM)	P. putida KT2440			Sphingobium sp. SYK-6			S. lignovorans B1D3A			N. aromaticivorans JMN2			N. aromaticivorans F199			R. opacus PD630			R. toruloidesNBRC0880				4HB (mM)	P. putida KT2440			Sphingobium sp. SYK-6			S. lignovorans B1D3A			N. aromaticivorans JMN2			N. aromaticivorans F199			R. opacus PD630			R. toruloidesNBRC0880
5	4.6	4.69	4.67	23.8023	23.7423	24.0093	9.75774	9.60104	10.3439	4.58152	4.60415	4.38178	5.44663	5.63208	5.69412	22.0494	22.436	22.1277	0.1	0.1	0.1		5	0	0	0	0	0	0	0	0	0	0	0	0	0	0	0	0	0	0	0	0	0
25	7.97	7.94	7.81				68.6424	68.3829	69.4564	32.013	31.2202	30.9593	33.7345	33.9903	33.238	35.9454	36.4343	35.9765	3.99464	4.06974	3.97993		25	3.37	3.25	3.14				58.8846	58.7819	59.1125	27.4315	26.6161	26.5775	28.2879	28.3582	27.5439	13.896	13.9983	13.8488	3.89464	3.96974	3.87993
50	12.17	12.38	12.22													36.7041	36.6694	36.6875	4.74575	4.77933	4.85549		50	7.57	7.69	7.55													14.6547	14.2334	14.5598	4.64575	4.67933	4.75549
75	12.91	12.71	12.06													39.3107	39.5186	40.0817	7.18131	7.61153	6.89145		75	8.31	8.02	7.39													17.2613	17.0826	17.954	7.08131	7.51153	6.79145
100	12.34	11.99	12.17													40.8972	41.6347	40.3107	9.4442	8.91156	9.47241		100	7.74	7.3	7.5													18.8478	19.1988	18.183	9.3442	8.81156	9.37241
Acetate (mM)	P. putida KT2440			Sphingobium sp. SYK-6			S. lignovorans B1D3A			N. aromaticivorans JMN2			N. aromaticivorans F199			R. opacus PD630			R. toruloides NBRC0880				Acetate (mM)	P. putida KT2440			Sphingobium sp. SYK-6			S. lignovorans B1D3A			N. aromaticivorans JMN2			N. aromaticivorans F199			R. opacus PD630			R. toruloides NBRC0880
10	3.05	2.15	2.85	49.9517	52.7202	53.7505	14.757	14.6532	14.4747	6.45351	6.66079	7.04435	5.22281	5.05409	5.29784	36.5461	35.3983	35.849					10	0	0	0	0	0	0	0	0	0	0	0	0	0	0	0	0	0	0
25	6.77	6.38	6.75	80.3553	82.2498	83.4273	22.7234	22.7693	22.6463	13.6069	13.8144	13.5901	10.1004	10.4259	10.3904	42.8896	42.5481	42.7004	10.6783	11.0149	10.0744		25	3.72	4.23	3.9	30.4037	29.5296	29.6768	7.96633	8.11611	8.17152	7.15335	7.15361	6.54571	4.87754	5.37185	5.0926	6.34349	7.14978	6.85133	0	0	0
50	9.02	9.06	9.41				47.2774	45.3544	45.087	36.6588	36.381	37.8072	30.2666	29.2769	27.8908	57.203	56.6458	58.4183	20.0733	18.5915	20.4475		50	5.97	6.91	6.56				32.5203	30.7012	30.6122	30.2053	29.7202	30.7628	25.0438	24.2228	22.593	20.6569	21.2475	22.5693	9.39497	7.57659	10.3731
75	13.95	14.3	14.51							85.0962	80.0339	80.8235	66.6418	68.1399	75.9308	67.4557	65.2767	69.5001	22.8344	22.345	22.5362		75	10.9	12.15	11.66							78.6427	73.3731	73.7791	61.419	63.0858	70.6329	30.9095	29.8784	33.6511	12.156	11.3301	12.4618
100	20.86	20.46	20.75										100	100	100	77.4672	78.1209	78.909	22.7205	21.7539	21.4997		100	17.81	18.31	17.9										94.7772	94.9459	94.7022	40.9211	42.7227	43.06	12.0422	10.7391	11.4253
Lactate (mM)	P. putida KT2440			Sphingobium sp. SYK-6			S. lignovorans B1D3A			N. aromaticivorans JMN2			N. aromaticivorans F199			R. opacus PD630			R. toruloides NBRC0880				Lactate (mM)	P. putida KT2440			Sphingobium sp. SYK-6			S. lignovorans B1D3A			N. aromaticivorans JMN2			N. aromaticivorans F199			R. opacus PD630			R. toruloides NBRC0880
10	5.12864	5.25772	5.19285							68.1193	86.4759	70.9859				22.1974	21.5574	20.736					10	0	0	0							0	0	0				0	0	0
25	5.54685	5.63336	5.62128							59.1744	60.8745	60.8704	100	100	100	33.2025	32.8371	32.8391					25	0.418203	0.375645	0.428427							-8.94489	-25.6014	-10.1155	0	0	0	11.0051	11.2796	12.1031
50	5.58172	5.64439	5.59796							61.1784	57.3271	55.3864	78.9463	81.9793	88.3071	33.1003	32.9791	32.807					50	0.453079	0.386673	0.405106							-6.94093	-29.1489	-15.5996	-21.0537	-18.0207	-11.6929	10.9029	11.4217	12.071
75	5.60991	5.57342	5.50015							56.8847	57.4623	58.1909	69.7105	72.4302	75.7965	31.0587	30.8533	31.004					75	0.481269	0.315706	0.307292							-11.2346	-29.0136	-12.795	-30.2895	-27.5698	-24.2035	8.8613	9.29592	10.2681
100	5.58052	5.59556	5.44995							73.8958	83.591		68.3842	96.7428	83.1738	30.1538	29.6929	29.5642					100	0.451877	0.337842	0.257094							5.77653	-2.88489		-31.6158	-3.25718	-16.8262	7.9564	8.13553	8.82822
vanillin (mM)	P. putida KT2440			Sphingobium sp. SYK-6			S. lignovorans B1D3A			N. aromaticivorans JMN2			N. aromaticivorans F199			R. opacus PD630			R. toruloides NBRC0880				vanillin (mM)	P. putida KT2440			Sphingobium sp. SYK-6			S. lignovorans B1D3A			N. aromaticivorans JMN2			N. aromaticivorans F199			R. opacus PD630			R. toruloides NBRC0880
5	9.41952	9.21878	8.94689	11.0491	11.1731	10.8695	8.7299	8.50574	8.59744	12.4839	12.4689	12.6244	10.0238	10.7497	10.0123	24.5433	26.2475	24.5816					5	0	0	0	0	0	0	0	0	0	0	0	0	0	0	0	0	0	0
10	13.0425	12.9613	12.5305	23.7658	23.5416	23.6722	22.9763	22.7987	22.8717	24.4671	24.2598	24.4586	20.926	20.4961	20.8997	29.9154	30.4595	30.7582					10	3.62298	3.7425	3.58358	12.7167	12.3685	12.8027	14.2464	14.293	14.2743	11.9833	11.7908	11.8342	10.9022	9.74642	10.8874	5.37207	4.21191	6.17655
15	26.8956	27.7392	26.2586	26.0775	25.8138	25.6513	24.9126	25.0682	24.9311	26.1703	26.1663	26.4033	22.7355	23.0792	22.9882	46.1604	47.6607	46.373					15	17.476	18.5204	17.3117	15.0283	14.6406	14.7818	16.1827	16.5625	16.3336	13.6865	13.6974	13.779	12.7117	12.3294	12.9759	21.6171	21.4131	21.7914
25	49.99	50.3233	50.5082				59.1316	81.6296	65.6536														25	40.5704	41.1045	41.5613				50.4017	73.1238	57.0561
50																							50
4Hbald (mM)	P. putida KT2440			Sphingobium sp. SYK-6			S. lignovorans B1D3A			N. aromaticivorans JMN2			N. aromaticivorans F199			R. opacus PD630			R. toruloides NBRC0880				4Hbald (mM)	P. putida KT2440			Sphingobium sp. SYK-6			S. lignovorans B1D3A			N. aromaticivorans JMN2			N. aromaticivorans F199			R. opacus PD630			R. toruloides NBRC0880
5	5.21286	5.30312	5.26833	10.037	10.0443	9.79268	8.91619	8.87837	8.85954	28.3551	27.7963	27.3284	19.9313	21.2184	22.3929	24.0252	22.9723	23.1457	37.42	36.63	35.98		5	0	0	0	0	0	0	0	0	0	0	0	0	0	0	0	0	0	0	0	0	0
10	55.5686	55.3984	53.5441	58.2861	51.1331	50.8763	51.2046	53.343	53.0245														10	50.3558	50.0952	48.2758	48.2491	41.0888	41.0836	42.2884	44.4646	44.165
15																							15
25																							25
50																							50

## Sheet: Fig2_MockAPL
P. putida KT2440																	S. lignivorans SYK-6																	S. lignivorans B1D3A
Time (h)	10% mock APL			25% mock APL			50% mock APL			75% mock APL			100% mock APL				Time (h)	10% mock APL			25% mock APL			50% mock APL			75% mock APL			100% mock APL				Time (h)	10% mock APL			25% mock APL			50% mock APL			75% mock APL			100% mock APL
0	0.116	0.117	0.108	0.126	0.109	0.115	0.113	0.117	0.112	0.118	0.11	0.11	0.121	0.133	0.111		0	0.099	0.098	0.109	0.103	0.101	0.11	0.104	0.105	0.115	0.113	0.109	0.119	0.113	0.112	0.118		0	0.105	0.109	0.107	0.109	0.106	0.113	0.108	0.114	0.112	0.107	0.107	0.115	0.105	0.108	0.108
0.25	0.12	0.12	0.11	0.129	0.11	0.115	0.114	0.119	0.114	0.12	0.114	0.11	0.124	0.132	0.113		0.25	0.099	0.099	0.109	0.103	0.101	0.111	0.105	0.106	0.116	0.115	0.11	0.119	0.114	0.114	0.12		0.25	0.106	0.11	0.107	0.11	0.107	0.114	0.109	0.113	0.113	0.108	0.109	0.116	0.106	0.109	0.109
0.5	0.12	0.118	0.112	0.131	0.113	0.116	0.114	0.124	0.114	0.12	0.112	0.111	0.126	0.134	0.113		0.5	0.1	0.1	0.111	0.103	0.102	0.111	0.105	0.106	0.116	0.114	0.11	0.12	0.115	0.114	0.12		0.5	0.107	0.11	0.108	0.11	0.107	0.114	0.11	0.114	0.114	0.109	0.109	0.117	0.107	0.109	0.109
0.75	0.122	0.12	0.112	0.133	0.113	0.121	0.115	0.118	0.115	0.119	0.112	0.111	0.131	0.136	0.114		0.75	0.101	0.101	0.113	0.104	0.102	0.112	0.106	0.107	0.116	0.115	0.111	0.12	0.115	0.115	0.121		0.75	0.107	0.11	0.108	0.11	0.107	0.114	0.11	0.114	0.114	0.109	0.109	0.117	0.107	0.11	0.11
1	0.124	0.12	0.113	0.133	0.114	0.12	0.115	0.119	0.116	0.12	0.112	0.112	0.133	0.135	0.115		1	0.103	0.103	0.115	0.104	0.102	0.112	0.106	0.107	0.117	0.116	0.111	0.12	0.116	0.115	0.121		1	0.107	0.11	0.108	0.11	0.107	0.114	0.109	0.114	0.114	0.109	0.11	0.117	0.107	0.11	0.11
1.25	0.125	0.122	0.119	0.137	0.118	0.126	0.116	0.123	0.117	0.125	0.114	0.115	0.13	0.137	0.115		1.25	0.105	0.105	0.118	0.105	0.103	0.113	0.107	0.108	0.118	0.117	0.112	0.121	0.116	0.116	0.122		1.25	0.107	0.111	0.108	0.11	0.107	0.114	0.109	0.114	0.113	0.109	0.11	0.117	0.107	0.11	0.11
1.5	0.126	0.124	0.122	0.138	0.118	0.125	0.118	0.12	0.118	0.121	0.114	0.115	0.13	0.139	0.116		1.5	0.107	0.107	0.12	0.105	0.104	0.114	0.108	0.109	0.119	0.117	0.112	0.122	0.117	0.116	0.122		1.5	0.108	0.111	0.108	0.11	0.107	0.114	0.109	0.115	0.114	0.11	0.11	0.118	0.108	0.11	0.11
1.75	0.13	0.127	0.123	0.142	0.122	0.127	0.12	0.127	0.12	0.13	0.123	0.124	0.136	0.138	0.116		1.75	0.108	0.109	0.123	0.106	0.105	0.116	0.108	0.109	0.119	0.117	0.112	0.122	0.117	0.117	0.123		1.75	0.108	0.111	0.108	0.11	0.107	0.113	0.109	0.114	0.114	0.11	0.11	0.117	0.108	0.111	0.11
2	0.132	0.128	0.125	0.144	0.122	0.129	0.122	0.126	0.12	0.125	0.115	0.118	0.131	0.139	0.117		2	0.111	0.111	0.127	0.107	0.105	0.117	0.108	0.11	0.119	0.118	0.113	0.122	0.117	0.117	0.123		2	0.108	0.111	0.109	0.11	0.107	0.113	0.109	0.115	0.113	0.11	0.11	0.117	0.108	0.111	0.111
2.25	0.135	0.131	0.126	0.148	0.124	0.131	0.126	0.127	0.122	0.128	0.117	0.12	0.133	0.139	0.119		2.25	0.113	0.113	0.129	0.107	0.106	0.118	0.108	0.109	0.119	0.118	0.113	0.122	0.117	0.117	0.123		2.25	0.108	0.111	0.109	0.11	0.107	0.112	0.109	0.114	0.113	0.11	0.11	0.118	0.108	0.111	0.111
2.5	0.138	0.133	0.128	0.154	0.128	0.132	0.128	0.13	0.124	0.131	0.122	0.124	0.134	0.141	0.119		2.5	0.116	0.115	0.133	0.108	0.107	0.119	0.109	0.11	0.12	0.119	0.113	0.123	0.117	0.117	0.123		2.5	0.108	0.111	0.109	0.11	0.107	0.112	0.109	0.114	0.113	0.11	0.11	0.118	0.108	0.111	0.111
2.75	0.144	0.137	0.129	0.158	0.132	0.135	0.133	0.13	0.129	0.129	0.118	0.123	0.136	0.14	0.124		2.75	0.119	0.118	0.138	0.11	0.108	0.12	0.109	0.11	0.12	0.119	0.114	0.123	0.117	0.117	0.123		2.75	0.108	0.111	0.109	0.11	0.107	0.112	0.109	0.115	0.113	0.11	0.11	0.118	0.108	0.111	0.111
3	0.144	0.138	0.133	0.164	0.132	0.136	0.134	0.132	0.131	0.131	0.121	0.123	0.135	0.142	0.121		3	0.122	0.122	0.143	0.111	0.109	0.122	0.11	0.111	0.121	0.119	0.114	0.124	0.118	0.117	0.123		3	0.108	0.111	0.109	0.11	0.107	0.113	0.109	0.114	0.113	0.11	0.111	0.118	0.108	0.111	0.111
3.25	0.147	0.141	0.136	0.169	0.135	0.137	0.138	0.134	0.135	0.132	0.128	0.126	0.139	0.145	0.125		3.25	0.126	0.125	0.147	0.112	0.11	0.123	0.111	0.112	0.121	0.12	0.115	0.124	0.118	0.118	0.123		3.25	0.108	0.112	0.109	0.11	0.107	0.112	0.109	0.114	0.113	0.11	0.11	0.118	0.108	0.111	0.111
3.5	0.151	0.145	0.142	0.174	0.136	0.138	0.14	0.137	0.135	0.139	0.13	0.126	0.137	0.145	0.127		3.5	0.129	0.128	0.152	0.112	0.111	0.125	0.111	0.112	0.121	0.12	0.115	0.125	0.118	0.117	0.123		3.5	0.108	0.112	0.11	0.11	0.107	0.113	0.109	0.114	0.113	0.11	0.111	0.118	0.109	0.111	0.111
3.75	0.154	0.148	0.147	0.18	0.139	0.142	0.145	0.14	0.139	0.14	0.129	0.127	0.139	0.146	0.125		3.75	0.133	0.132	0.158	0.114	0.113	0.127	0.111	0.112	0.121	0.121	0.116	0.125	0.117	0.117	0.123		3.75	0.108	0.112	0.109	0.11	0.107	0.113	0.109	0.114	0.113	0.11	0.11	0.118	0.109	0.112	0.112
4	0.155	0.148	0.146	0.165	0.144	0.143	0.148	0.144	0.141	0.141	0.129	0.127	0.138	0.147	0.127		4	0.138	0.136	0.165	0.115	0.114	0.129	0.112	0.113	0.122	0.121	0.116	0.125	0.118	0.118	0.124		4	0.108	0.112	0.109	0.11	0.108	0.113	0.109	0.114	0.113	0.11	0.111	0.118	0.109	0.112	0.112
4.25	0.16	0.153	0.151	0.181	0.147	0.143	0.151	0.146	0.143	0.143	0.133	0.129	0.139	0.15	0.127		4.25	0.143	0.142	0.172	0.117	0.115	0.131	0.113	0.113	0.123	0.122	0.117	0.126	0.118	0.118	0.124		4.25	0.108	0.112	0.109	0.11	0.108	0.113	0.109	0.114	0.113	0.11	0.111	0.118	0.109	0.112	0.112
4.5	0.161	0.155	0.154	0.193	0.152	0.145	0.154	0.15	0.146	0.145	0.132	0.13	0.14	0.152	0.127		4.5	0.147	0.146	0.179	0.119	0.117	0.134	0.113	0.114	0.123	0.123	0.118	0.126	0.118	0.118	0.124		4.5	0.109	0.112	0.11	0.111	0.108	0.113	0.109	0.114	0.113	0.11	0.111	0.118	0.109	0.112	0.112
4.75	0.166	0.157	0.159	0.199	0.155	0.152	0.156	0.154	0.149	0.147	0.133	0.131	0.139	0.152	0.127		4.75	0.153	0.152	0.186	0.121	0.118	0.136	0.113	0.114	0.124	0.124	0.118	0.127	0.118	0.119	0.124		4.75	0.109	0.112	0.11	0.111	0.108	0.113	0.109	0.114	0.113	0.11	0.11	0.118	0.109	0.112	0.112
5	0.173	0.161	0.167	0.208	0.158	0.162	0.158	0.159	0.152	0.149	0.134	0.133	0.139	0.154	0.128		5	0.159	0.157	0.195	0.121	0.12	0.138	0.114	0.115	0.124	0.124	0.118	0.127	0.119	0.119	0.124		5	0.109	0.112	0.11	0.111	0.108	0.113	0.109	0.114	0.113	0.11	0.11	0.118	0.109	0.112	0.112
5.25	0.181	0.169	0.175	0.224	0.165	0.175	0.162	0.167	0.153	0.15	0.137	0.135	0.139	0.153	0.128		5.25	0.166	0.164	0.204	0.123	0.121	0.14	0.114	0.115	0.124	0.124	0.118	0.128	0.119	0.119	0.125		5.25	0.109	0.112	0.11	0.11	0.108	0.113	0.109	0.115	0.113	0.11	0.11	0.118	0.109	0.113	0.112
5.5	0.193	0.176	0.187	0.25	0.174	0.193	0.168	0.173	0.159	0.152	0.138	0.137	0.141	0.154	0.128		5.5	0.173	0.171	0.214	0.125	0.123	0.143	0.114	0.115	0.124	0.125	0.119	0.128	0.119	0.119	0.125		5.5	0.109	0.112	0.11	0.111	0.108	0.113	0.109	0.114	0.113	0.11	0.11	0.118	0.109	0.113	0.112
5.75	0.205	0.185	0.202	0.278	0.185	0.219	0.178	0.187	0.165	0.151	0.135	0.139	0.141	0.154	0.13		5.75	0.18	0.178	0.225	0.126	0.124	0.145	0.114	0.115	0.125	0.125	0.119	0.128	0.119	0.119	0.125		5.75	0.109	0.112	0.11	0.111	0.109	0.113	0.109	0.114	0.113	0.11	0.11	0.117	0.109	0.113	0.112
6	0.219	0.197	0.221	0.314	0.202	0.253	0.193	0.207	0.176	0.152	0.14	0.138	0.142	0.148	0.129		6	0.188	0.186	0.237	0.128	0.127	0.148	0.115	0.115	0.124	0.125	0.12	0.129	0.119	0.119	0.125		6	0.109	0.112	0.11	0.111	0.109	0.113	0.109	0.114	0.113	0.109	0.11	0.117	0.109	0.113	0.112
6.25	0.236	0.21	0.241	0.35	0.225	0.294	0.209	0.233	0.189	0.156	0.141	0.137	0.142	0.153	0.132		6.25	0.197	0.195	0.247	0.131	0.128	0.151	0.115	0.116	0.125	0.126	0.12	0.129	0.12	0.12	0.125		6.25	0.109	0.113	0.11	0.11	0.109	0.113	0.109	0.114	0.113	0.109	0.11	0.117	0.109	0.112	0.112
6.5	0.253	0.228	0.263	0.396	0.253	0.341	0.234	0.266	0.207	0.165	0.142	0.139	0.142	0.156	0.132		6.5	0.207	0.204	0.26	0.134	0.131	0.154	0.115	0.115	0.125	0.126	0.12	0.13	0.12	0.12	0.125		6.5	0.109	0.113	0.11	0.111	0.109	0.113	0.109	0.115	0.113	0.109	0.11	0.118	0.109	0.113	0.113
6.75	0.27	0.244	0.283	0.438	0.29	0.391	0.266	0.309	0.231	0.176	0.143	0.146	0.142	0.154	0.129		6.75	0.216	0.214	0.275	0.136	0.132	0.157	0.116	0.117	0.126	0.126	0.121	0.13	0.12	0.12	0.126		6.75	0.109	0.112	0.11	0.111	0.109	0.113	0.109	0.114	0.112	0.109	0.11	0.117	0.109	0.112	0.112
7	0.289	0.262	0.308	0.482	0.333	0.445	0.309	0.362	0.264	0.19	0.147	0.155	0.145	0.154	0.131		7	0.228	0.225	0.289	0.138	0.135	0.16	0.116	0.117	0.126	0.127	0.121	0.13	0.12	0.12	0.126		7	0.109	0.113	0.111	0.11	0.109	0.113	0.109	0.114	0.112	0.109	0.109	0.117	0.109	0.112	0.112
7.25	0.308	0.282	0.331	0.531	0.381	0.495	0.364	0.42	0.306	0.206	0.154	0.168	0.151	0.154	0.131		7.25	0.239	0.236	0.306	0.139	0.133	0.163	0.116	0.117	0.126	0.127	0.121	0.13	0.12	0.12	0.125		7.25	0.109	0.113	0.111	0.111	0.109	0.113	0.108	0.114	0.112	0.109	0.109	0.117	0.109	0.112	0.112
7.5	0.325	0.303	0.35	0.575	0.432	0.543	0.424	0.483	0.359	0.229	0.164	0.182	0.159	0.155	0.131		7.5	0.252	0.248	0.324	0.138	0.136	0.165	0.116	0.117	0.126	0.121	0.122	0.128	0.12	0.12	0.126		7.5	0.109	0.113	0.111	0.111	0.109	0.113	0.108	0.114	0.111	0.109	0.109	0.117	0.109	0.111	0.112
7.75	0.339	0.319	0.367	0.619	0.483	0.588	0.485	0.544	0.419	0.257	0.176	0.2	0.167	0.155	0.132		7.75	0.266	0.262	0.342	0.141	0.14	0.17	0.117	0.117	0.126	0.122	0.122	0.128	0.121	0.12	0.126		7.75	0.109	0.113	0.111	0.11	0.109	0.113	0.108	0.113	0.111	0.109	0.109	0.117	0.108	0.111	0.112
8	0.351	0.333	0.381	0.66	0.533	0.625	0.542	0.599	0.481	0.29	0.191	0.223	0.177	0.156	0.132		8	0.282	0.277	0.358	0.144	0.142	0.174	0.117	0.117	0.127	0.122	0.122	0.129	0.121	0.121	0.126		8	0.109	0.113	0.111	0.11	0.109	0.113	0.109	0.114	0.112	0.109	0.109	0.117	0.109	0.112	0.112
8.25	0.358	0.347	0.39	0.689	0.578	0.656	0.592	0.648	0.535	0.331	0.21	0.253	0.188	0.157	0.132		8.25	0.297	0.292	0.374	0.147	0.144	0.178	0.117	0.117	0.127	0.122	0.122	0.129	0.121	0.121	0.126		8.25	0.11	0.113	0.111	0.111	0.109	0.113	0.108	0.114	0.112	0.109	0.109	0.117	0.109	0.112	0.112
8.5	0.363	0.357	0.393	0.721	0.619	0.689	0.638	0.693	0.585	0.379	0.235	0.289	0.202	0.159	0.134		8.5	0.313	0.308	0.391	0.15	0.147	0.183	0.117	0.117	0.127	0.123	0.122	0.129	0.121	0.121	0.126		8.5	0.11	0.113	0.111	0.111	0.108	0.113	0.108	0.114	0.112	0.109	0.109	0.117	0.109	0.111	0.112
8.75	0.355	0.354	0.382	0.743	0.65	0.711	0.676	0.734	0.627	0.427	0.266	0.326	0.217	0.16	0.138		8.75	0.329	0.324	0.408	0.153	0.15	0.187	0.118	0.118	0.128	0.123	0.123	0.129	0.121	0.121	0.126		8.75	0.11	0.113	0.111	0.111	0.109	0.113	0.108	0.114	0.112	0.109	0.109	0.117	0.109	0.112	0.113
9	0.354	0.357	0.381	0.767	0.685	0.736	0.715	0.774	0.669	0.479	0.303	0.373	0.237	0.163	0.144		9	0.346	0.343	0.427	0.157	0.155	0.191	0.118	0.118	0.128	0.124	0.123	0.129	0.122	0.121	0.127		9	0.11	0.113	0.111	0.111	0.109	0.114	0.108	0.114	0.112	0.109	0.109	0.117	0.109	0.111	0.112
9.25	0.351	0.355	0.377	0.789	0.714	0.749	0.748	0.806	0.704	0.529	0.345	0.424	0.261	0.168	0.151		9.25	0.365	0.358	0.442	0.16	0.158	0.196	0.118	0.118	0.128	0.123	0.123	0.13	0.122	0.121	0.127		9.25	0.11	0.113	0.111	0.111	0.108	0.114	0.108	0.114	0.111	0.109	0.11	0.117	0.109	0.112	0.112
9.5	0.347	0.353	0.374	0.801	0.739	0.747	0.782	0.84	0.74	0.577	0.392	0.474	0.287	0.174	0.159		9.5	0.381	0.375	0.459	0.163	0.161	0.201	0.119	0.119	0.128	0.123	0.123	0.13	0.122	0.122	0.127		9.5	0.11	0.113	0.111	0.111	0.107	0.114	0.108	0.113	0.111	0.109	0.109	0.116	0.109	0.112	0.113
9.75	0.346	0.351	0.371	0.802	0.746	0.752	0.815	0.872	0.776	0.626	0.443	0.525	0.319	0.183	0.169		9.75	0.396	0.393	0.477	0.167	0.164	0.207	0.119	0.119	0.129	0.125	0.123	0.13	0.122	0.122	0.127		9.75	0.11	0.113	0.111	0.111	0.107	0.114	0.108	0.113	0.111	0.109	0.109	0.116	0.109	0.112	0.113
10	0.344	0.348	0.368	0.807	0.746	0.763	0.846	0.902	0.807	0.671	0.496	0.575	0.354	0.193	0.181		10	0.41	0.408	0.491	0.171	0.168	0.212	0.119	0.118	0.128	0.129	0.123	0.13	0.122	0.122	0.127		10	0.11	0.113	0.111	0.111	0.107	0.114	0.108	0.113	0.111	0.109	0.109	0.116	0.109	0.111	0.113
10.25	0.342	0.346	0.366	0.815	0.754	0.772	0.878	0.933	0.841	0.716	0.546	0.623	0.393	0.204	0.195		10.25	0.425	0.425	0.502	0.175	0.172	0.218	0.119	0.119	0.129	0.13	0.123	0.13	0.122	0.122	0.127		10.25	0.11	0.114	0.111	0.111	0.107	0.114	0.108	0.113	0.112	0.109	0.109	0.116	0.109	0.112	0.113
10.5	0.338	0.341	0.362	0.817	0.761	0.767	0.9	0.952	0.867	0.752	0.594	0.665	0.434	0.217	0.212		10.5	0.438	0.438	0.511	0.18	0.176	0.224	0.119	0.119	0.129	0.126	0.124	0.131	0.123	0.122	0.128		10.5	0.11	0.114	0.112	0.111	0.107	0.114	0.108	0.113	0.112	0.109	0.109	0.117	0.109	0.112	0.113
10.75	0.333	0.337	0.357	0.818	0.766	0.766	0.932	0.98	0.898	0.792	0.642	0.708	0.478	0.234	0.231		10.75	0.452	0.452	0.527	0.183	0.18	0.231	0.12	0.119	0.129	0.129	0.124	0.134	0.123	0.122	0.128		10.75	0.111	0.114	0.112	0.111	0.107	0.114	0.108	0.113	0.111	0.109	0.109	0.117	0.109	0.112	0.113
11	0.331	0.335	0.354	0.812	0.762	0.76	0.955	1.002	0.924	0.825	0.686	0.746	0.521	0.254	0.254		11	0.464	0.466	0.536	0.188	0.185	0.237	0.12	0.119	0.129	0.13	0.124	0.134	0.123	0.123	0.128		11	0.111	0.114	0.112	0.111	0.107	0.114	0.108	0.112	0.111	0.109	0.109	0.117	0.109	0.111	0.113
11.25	0.328	0.332	0.351	0.805	0.755	0.752	0.98	1.023	0.949	0.86	0.732	0.782	0.564	0.278	0.281		11.25	0.478	0.482	0.55	0.194	0.19	0.245	0.12	0.12	0.13	0.132	0.125	0.134	0.123	0.123	0.129		11.25	0.111	0.114	0.112	0.112	0.108	0.114	0.108	0.112	0.111	0.109	0.109	0.117	0.109	0.112	0.113
11.5	0.326	0.329	0.349	0.799	0.749	0.745	1.004	1.047	0.976	0.887	0.77	0.816	0.606	0.305	0.312		11.5	0.491	0.498	0.564	0.198	0.196	0.253	0.12	0.12	0.13	0.132	0.125	0.133	0.124	0.124	0.129		11.5	0.11	0.114	0.112	0.111	0.107	0.114	0.107	0.111	0.111	0.108	0.109	0.116	0.109	0.111	0.113
11.75	0.325	0.328	0.348	0.795	0.747	0.743	1.023	1.068	1.005	0.897	0.807	0.843	0.644	0.336	0.348		11.75	0.505	0.51	0.577	0.205	0.202	0.261	0.12	0.12	0.13	0.132	0.126	0.134	0.125	0.124	0.129		11.75	0.111	0.114	0.112	0.111	0.107	0.114	0.108	0.112	0.111	0.109	0.109	0.117	0.109	0.111	0.113
12	0.324	0.326	0.347	0.79	0.742	0.738	1.034	1.08	1.035	0.997	0.839	0.89	0.681	0.368	0.386		12	0.519	0.526	0.591	0.211	0.207	0.269	0.12	0.121	0.13	0.132	0.126	0.134	0.125	0.124	0.129		12	0.111	0.114	0.112	0.111	0.108	0.114	0.107	0.112	0.111	0.109	0.109	0.117	0.109	0.111	0.113
12.25	0.326	0.326	0.349	0.789	0.74	0.736	1.047	1.092	1.055	1.049	0.881	0.959	0.721	0.405	0.428		12.25	0.528	0.536	0.609	0.216	0.213	0.277	0.121	0.121	0.13	0.133	0.126	0.134	0.125	0.124	0.129		12.25	0.111	0.114	0.112	0.113	0.108	0.114	0.107	0.111	0.111	0.109	0.109	0.119	0.11	0.112	0.113
12.5	0.328	0.328	0.351	0.787	0.738	0.735	1.062	1.105	1.065	1.068	0.902	1.012	0.757	0.445	0.47		12.5	0.54	0.55	0.62	0.221	0.218	0.285	0.121	0.121	0.13	0.133	0.126	0.134	0.125	0.124	0.129		12.5	0.111	0.114	0.112	0.111	0.108	0.114	0.107	0.112	0.111	0.109	0.109	0.12	0.11	0.111	0.113
12.75	0.33	0.33	0.353	0.777	0.728	0.725	1.068	1.115	1.081	1.105	1.006	1.095	0.881	0.489	0.516		12.75	0.557	0.562	0.63	0.227	0.224	0.294	0.122	0.122	0.131	0.133	0.126	0.134	0.125	0.124	0.129		12.75	0.111	0.114	0.112	0.111	0.107	0.114	0.107	0.112	0.111	0.108	0.109	0.118	0.11	0.111	0.113
13	0.336	0.334	0.358	0.777	0.728	0.725	1.085	1.133	1.103	1.128	1.066	1.13	0.92	0.535	0.565		13	0.565	0.572	0.647	0.235	0.23	0.305	0.122	0.122	0.131	0.133	0.127	0.134	0.125	0.125	0.129		13	0.111	0.114	0.112	0.111	0.108	0.114	0.107	0.112	0.111	0.109	0.109	0.117	0.11	0.111	0.113
13.25	0.336	0.338	0.362	0.767	0.716	0.714	1.129	1.185	1.184	1.16	1.126	1.171	0.987	0.577	0.608		13.25	0.574	0.587	0.654	0.241	0.233	0.315	0.122	0.121	0.13	0.133	0.127	0.135	0.125	0.125	0.13		13.25	0.111	0.114	0.113	0.112	0.108	0.115	0.107	0.111	0.111	0.109	0.11	0.117	0.11	0.111	0.113
13.5	0.336	0.341	0.363	0.759	0.709	0.706	1.165	1.24	1.244	1.179	1.15	1.19	1.024	0.618	0.646		13.5	0.59	0.598	0.666	0.249	0.241	0.324	0.121	0.122	0.13	0.134	0.127	0.135	0.126	0.125	0.13		13.5	0.111	0.114	0.112	0.111	0.108	0.115	0.107	0.111	0.111	0.109	0.11	0.117	0.109	0.111	0.113
13.75	0.335	0.343	0.363	0.754	0.706	0.704	1.184	1.263	1.258	1.193	1.163	1.206	1.051	0.655	0.68		13.75	0.603	0.613	0.678	0.255	0.249	0.337	0.122	0.121	0.131	0.135	0.128	0.135	0.126	0.125	0.13		13.75	0.111	0.114	0.113	0.111	0.108	0.115	0.107	0.112	0.111	0.109	0.109	0.116	0.109	0.111	0.113
14	0.332	0.341	0.36	0.741	0.696	0.695	1.222	1.296	1.28	1.206	1.177	1.224	1.12	0.706	0.771		14	0.612	0.63	0.691	0.263	0.258	0.347	0.124	0.122	0.131	0.133	0.128	0.135	0.126	0.125	0.13		14	0.111	0.114	0.113	0.112	0.108	0.115	0.107	0.111	0.111	0.108	0.109	0.116	0.11	0.111	0.113
14.25	0.335	0.34	0.362	0.741	0.695	0.693	1.241	1.311	1.292	1.218	1.191	1.233	1.13	0.747	0.82		14.25	0.627	0.644	0.705	0.271	0.268	0.359	0.123	0.122	0.131	0.133	0.128	0.135	0.127	0.126	0.13		14.25	0.112	0.115	0.113	0.111	0.108	0.115	0.107	0.112	0.112	0.109	0.109	0.117	0.11	0.112	0.114
14.5	0.336	0.342	0.364	0.742	0.694	0.692	1.26	1.324	1.304	1.228	1.204	1.245	1.146	0.823	0.888		14.5	0.643	0.65	0.716	0.279	0.273	0.373	0.124	0.122	0.131	0.134	0.128	0.135	0.127	0.126	0.13		14.5	0.111	0.115	0.113	0.111	0.108	0.115	0.107	0.111	0.111	0.108	0.109	0.116	0.109	0.112	0.113
14.75	0.338	0.343	0.366	0.734	0.687	0.685	1.279	1.343	1.317	1.245	1.225	1.262	1.174	0.881	0.937		14.75	0.659	0.664	0.728	0.287	0.281	0.387	0.124	0.123	0.132	0.134	0.128	0.135	0.127	0.126	0.13		14.75	0.111	0.115	0.113	0.112	0.108	0.115	0.107	0.111	0.111	0.108	0.109	0.116	0.11	0.112	0.114
15	0.34	0.346	0.369	0.73	0.684	0.684	1.288	1.35	1.326	1.25	1.231	1.269	1.177	0.909	0.956		15	0.668	0.676	0.747	0.296	0.285	0.398	0.124	0.122	0.131	0.133	0.128	0.135	0.126	0.126	0.13		15	0.112	0.115	0.113	0.111	0.108	0.115	0.107	0.112	0.112	0.108	0.11	0.116	0.11	0.112	0.114
15.25	0.343	0.348	0.371	0.728	0.682	0.682	1.303	1.361	1.335	1.266	1.252	1.288	1.206	0.994	1.028		15.25	0.677	0.686	0.754	0.308	0.297	0.416	0.123	0.122	0.131	0.134	0.128	0.135	0.126	0.126	0.13		15.25	0.111	0.115	0.113	0.112	0.108	0.115	0.107	0.111	0.111	0.108	0.109	0.116	0.11	0.112	0.114
15.5	0.345	0.351	0.373	0.728	0.682	0.683	1.312	1.368	1.343	1.277	1.264	1.296	1.216	1.019	1.051		15.5	0.688	0.697	0.767	0.317	0.31	0.428	0.124	0.122	0.132	0.134	0.128	0.134	0.127	0.126	0.13		15.5	0.111	0.115	0.113	0.112	0.108	0.115	0.107	0.111	0.111	0.108	0.111	0.116	0.11	0.112	0.114
15.75	0.346	0.352	0.375	0.722	0.677	0.678	1.32	1.373	1.349	1.281	1.271	1.301	1.225	1.062	1.088		15.75	0.704	0.713	0.779	0.328	0.322	0.442	0.125	0.123	0.133	0.134	0.128	0.135	0.128	0.127	0.131		15.75	0.112	0.115	0.114	0.112	0.108	0.115	0.107	0.112	0.111	0.108	0.11	0.116	0.11	0.112	0.114
16	0.348	0.354	0.377	0.72	0.676	0.677	1.329	1.38	1.357	1.299	1.281	1.318	1.229	1.093	1.11		16	0.716	0.724	0.798	0.337	0.329	0.454	0.124	0.123	0.132	0.133	0.128	0.135	0.127	0.127	0.13		16	0.112	0.115	0.114	0.112	0.108	0.115	0.107	0.111	0.111	0.108	0.109	0.116	0.11	0.112	0.114
16.25	0.349	0.356	0.378	0.717	0.673	0.675	1.338	1.386	1.363	1.309	1.286	1.327	1.233	1.111	1.12		16.25	0.722	0.732	0.803	0.352	0.345	0.469	0.124	0.123	0.132	0.134	0.128	0.135	0.128	0.127	0.131		16.25	0.112	0.115	0.114	0.112	0.108	0.115	0.107	0.111	0.111	0.108	0.109	0.116	0.109	0.111	0.114
16.5	0.35	0.357	0.379	0.716	0.673	0.675	1.346	1.393	1.37	1.321	1.302	1.342	1.245	1.127	1.131		16.5	0.733	0.74	0.799	0.359	0.356	0.485	0.125	0.123	0.132	0.135	0.129	0.135	0.128	0.127	0.131		16.5	0.112	0.115	0.114	0.112	0.108	0.115	0.107	0.111	0.111	0.108	0.11	0.116	0.109	0.111	0.113
16.75	0.351	0.358	0.381	0.715	0.672	0.675	1.353	1.397	1.376	1.326	1.311	1.349	1.245	1.128	1.139		16.75	0.742	0.752	0.82	0.369	0.366	0.499	0.125	0.123	0.132	0.134	0.129	0.136	0.128	0.127	0.132		16.75	0.112	0.115	0.114	0.112	0.108	0.115	0.107	0.111	0.111	0.108	0.114	0.116	0.109	0.111	0.114
17	0.351	0.359	0.38	0.709	0.666	0.668	1.357	1.398	1.378	1.337	1.325	1.361	1.258	1.168	1.196		17	0.75	0.76	0.824	0.383	0.378	0.514	0.125	0.123	0.132	0.134	0.129	0.136	0.128	0.127	0.132		17	0.112	0.116	0.114	0.112	0.108	0.115	0.107	0.111	0.111	0.108	0.113	0.117	0.109	0.111	0.114
17.25	0.352	0.359	0.381	0.708	0.664	0.666	1.361	1.4	1.382	1.352	1.343	1.373	1.268	1.209	1.229		17.25	0.758	0.768	0.822	0.396	0.39	0.529	0.125	0.123	0.132	0.134	0.129	0.136	0.128	0.127	0.132		17.25	0.112	0.116	0.114	0.112	0.108	0.115	0.107	0.112	0.111	0.108	0.113	0.117	0.109	0.111	0.114
17.5	0.353	0.36	0.382	0.708	0.665	0.668	1.362	1.401	1.383	1.359	1.35	1.377	1.266	1.216	1.228		17.5	0.765	0.78	0.828	0.397	0.392	0.541	0.126	0.124	0.133	0.134	0.129	0.136	0.128	0.127	0.132		17.5	0.113	0.116	0.114	0.112	0.108	0.115	0.107	0.112	0.112	0.108	0.11	0.117	0.109	0.111	0.114
17.75	0.354	0.361	0.383	0.709	0.665	0.668	1.362	1.401	1.383	1.368	1.36	1.384	1.27	1.232	1.23		17.75	0.774	0.787	0.82	0.414	0.412	0.562	0.126	0.124	0.133	0.134	0.13	0.136	0.128	0.127	0.132		17.75	0.113	0.116	0.114	0.112	0.108	0.115	0.107	0.111	0.111	0.108	0.109	0.117	0.109	0.111	0.114
18	0.354	0.362	0.383	0.707	0.664	0.668	1.359	1.398	1.383	1.364	1.357	1.378	1.265	1.228	1.227		18	0.775	0.79	0.818	0.432	0.428	0.573	0.125	0.124	0.133	0.136	0.129	0.135	0.128	0.128	0.132		18	0.113	0.116	0.115	0.111	0.108	0.115	0.107	0.112	0.111	0.108	0.108	0.117	0.109	0.112	0.114
18.25	0.356	0.363	0.384	0.71	0.667	0.67	1.359	1.398	1.385	1.374	1.366	1.387	1.27	1.241	1.24		18.25	0.782	0.798	0.806	0.44	0.437	0.593	0.125	0.124	0.133	0.135	0.129	0.135	0.128	0.128	0.132		18.25	0.113	0.116	0.115	0.112	0.108	0.115	0.107	0.111	0.111	0.108	0.108	0.117	0.109	0.111	0.114
18.5	0.357	0.364	0.385	0.711	0.667	0.671	1.358	1.396	1.386	1.375	1.368	1.389	1.269	1.24	1.239		18.5	0.802	0.816	0.817	0.457	0.455	0.604	0.126	0.124	0.133	0.135	0.129	0.135	0.129	0.128	0.133		18.5	0.113	0.116	0.115	0.112	0.108	0.115	0.107	0.111	0.111	0.108	0.108	0.117	0.109	0.111	0.114
18.75	0.356	0.363	0.384	0.706	0.664	0.667	1.354	1.393	1.391	1.38	1.373	1.389	1.267	1.245	1.244		18.75	0.794	0.82	0.799	0.472	0.467	0.626	0.126	0.124	0.133	0.136	0.129	0.136	0.128	0.128	0.132		18.75	0.113	0.117	0.115	0.112	0.108	0.115	0.107	0.112	0.111	0.108	0.108	0.117	0.109	0.111	0.114
19	0.354	0.362	0.382	0.701	0.66	0.664	1.354	1.392	1.419	1.382	1.385	1.379	1.269	1.263	1.257		19	0.789	0.815	0.786	0.486	0.478	0.63	0.126	0.124	0.134	0.136	0.129	0.135	0.129	0.129	0.132		19	0.113	0.117	0.115	0.112	0.108	0.116	0.107	0.111	0.111	0.108	0.108	0.117	0.109	0.111	0.114
19.25	0.354	0.362	0.382	0.699	0.659	0.662	1.356	1.396	1.441	1.371	1.403	1.376	1.273	1.281	1.274		19.25	0.794	0.833	0.799	0.501	0.495	0.644	0.127	0.125	0.133	0.134	0.13	0.136	0.13	0.129	0.133		19.25	0.114	0.117	0.116	0.112	0.11	0.116	0.107	0.112	0.111	0.108	0.114	0.12	0.109	0.111	0.114
19.5	0.354	0.361	0.381	0.697	0.658	0.661	1.355	1.396	1.386	1.349	1.409	1.37	1.275	1.29	1.281		19.5	0.778	0.81	0.784	0.522	0.512	0.659	0.126	0.125	0.133	0.137	0.131	0.136	0.13	0.128	0.132		19.5	0.114	0.117	0.116	0.112	0.109	0.115	0.107	0.112	0.111	0.108	0.111	0.119	0.109	0.111	0.114
19.75	0.353	0.361	0.38	0.695	0.656	0.659	1.356	1.397	1.358	1.352	1.403	1.384	1.275	1.298	1.288		19.75	0.774	0.81	0.782	0.532	0.525	0.675	0.126	0.125	0.134	0.136	0.13	0.137	0.13	0.128	0.133		19.75	0.114	0.117	0.116	0.112	0.11	0.115	0.107	0.112	0.111	0.108	0.114	0.118	0.109	0.111	0.114
20	0.354	0.362	0.38	0.693	0.655	0.657	1.356	1.398	1.344	1.352	1.39	1.39	1.274	1.298	1.286		20	0.803	0.834	0.808	0.555	0.55	0.69	0.126	0.124	0.132	0.133	0.129	0.136	0.129	0.129	0.132		20	0.114	0.117	0.117	0.112	0.109	0.116	0.107	0.112	0.111	0.108	0.114	0.12	0.109	0.111	0.114
20.25	0.354	0.362	0.381	0.695	0.657	0.657	1.353	1.395	1.364	1.36	1.37	1.402	1.271	1.297	1.283		20.25	0.77	0.796	0.787	0.562	0.549	0.69	0.127	0.124	0.133	0.136	0.131	0.137	0.13	0.129	0.133		20.25	0.114	0.118	0.117	0.112	0.109	0.116	0.107	0.112	0.111	0.108	0.114	0.12	0.109	0.111	0.115
20.5	0.355	0.362	0.381	0.695	0.658	0.657	1.356	1.396	1.404	1.396	1.342	1.441	1.276	1.3	1.285		20.5	0.773	0.808	0.788	0.583	0.571	0.704	0.127	0.125	0.134	0.135	0.131	0.137	0.131	0.13	0.134		20.5	0.115	0.118	0.117	0.112	0.108	0.116	0.107	0.112	0.111	0.108	0.11	0.12	0.111	0.112	0.115
20.75	0.355	0.363	0.382	0.698	0.661	0.659	1.353	1.395	1.408	1.434	1.393	1.468	1.278	1.301	1.287		20.75	0.779	0.812	0.792	0.594	0.583	0.714	0.127	0.126	0.135	0.135	0.132	0.137	0.13	0.129	0.134		20.75	0.115	0.118	0.117	0.112	0.108	0.116	0.107	0.111	0.111	0.108	0.114	0.121	0.111	0.111	0.115
21	0.356	0.363	0.383	0.7	0.663	0.659	1.355	1.396	1.411	1.452	1.461	1.484	1.284	1.308	1.292		21	0.792	0.827	0.802	0.613	0.604	0.73	0.127	0.126	0.135	0.134	0.132	0.137	0.131	0.129	0.134		21	0.115	0.119	0.118	0.112	0.108	0.116	0.107	0.111	0.111	0.108	0.108	0.121	0.116	0.111	0.113
21.25	0.355	0.363	0.382	0.697	0.661	0.656	1.352	1.392	1.409	1.442	1.471	1.471	1.281	1.306	1.29		21.25	0.784	0.824	0.799	0.637	0.628	0.74	0.127	0.126	0.135	0.135	0.132	0.137	0.131	0.13	0.134		21.25	0.116	0.119	0.118	0.112	0.108	0.116	0.107	0.111	0.111	0.108	0.108	0.12	0.116	0.111	0.113
21.5	0.354	0.362	0.38	0.693	0.658	0.654	1.356	1.396	1.415	1.44	1.484	1.472	1.282	1.309	1.295		21.5	0.789	0.824	0.796	0.643	0.633	0.75	0.128	0.126	0.135	0.134	0.131	0.137	0.131	0.13	0.133		21.5	0.116	0.119	0.119	0.112	0.109	0.116	0.107	0.112	0.111	0.108	0.108	0.12	0.118	0.111	0.113
21.75	0.355	0.362	0.381	0.699	0.661	0.66	1.364	1.403	1.421	1.441	1.492	1.475	1.288	1.313	1.3		21.75	0.779	0.813	0.788	0.66	0.652	0.76	0.127	0.126	0.135	0.134	0.132	0.137	0.131	0.13	0.134		21.75	0.116	0.12	0.119	0.112	0.108	0.116	0.107	0.111	0.111	0.108	0.108	0.12	0.116	0.111	0.118
22	0.354	0.362	0.38	0.698	0.661	0.661	1.365	1.411	1.423	1.435	1.49	1.47	1.285	1.314	1.3		22	0.761	0.793	0.782	0.666	0.653	0.768	0.128	0.127	0.136	0.134	0.132	0.137	0.131	0.13	0.133		22	0.117	0.12	0.119	0.112	0.108	0.116	0.107	0.111	0.111	0.108	0.108	0.12	0.115	0.111	0.118
22.25	0.354	0.361	0.38	0.704	0.664	0.665	1.373	1.414	1.435	1.433	1.489	1.47	1.29	1.318	1.305		22.25	0.779	0.814	0.789	0.676	0.667	0.775	0.128	0.127	0.136	0.134	0.131	0.137	0.131	0.129	0.134		22.25	0.117	0.12	0.12	0.112	0.108	0.116	0.107	0.111	0.111	0.108	0.108	0.12	0.117	0.111	0.117
22.5	0.355	0.362	0.38	0.708	0.669	0.672	1.375	1.417	1.441	1.425	1.482	1.462	1.289	1.318	1.306		22.5	0.773	0.812	0.788	0.696	0.687	0.794	0.129	0.127	0.136	0.134	0.131	0.137	0.131	0.129	0.134		22.5	0.117	0.121	0.12	0.112	0.108	0.116	0.107	0.111	0.111	0.108	0.108	0.119	0.11	0.111	0.114
22.75	0.355	0.363	0.381	0.716	0.674	0.682	1.375	1.417	1.449	1.421	1.477	1.46	1.291	1.319	1.306		22.75	0.796	0.831	0.803	0.721	0.716	0.81	0.129	0.127	0.136	0.134	0.132	0.137	0.131	0.13	0.134		22.75	0.118	0.121	0.121	0.112	0.109	0.116	0.107	0.111	0.111	0.108	0.108	0.12	0.108	0.111	0.114
23	0.356	0.363	0.381	0.728	0.685	0.69	1.379	1.415	1.455	1.416	1.472	1.455	1.294	1.32	1.307		23	0.791	0.838	0.801	0.725	0.721	0.809	0.129	0.127	0.135	0.135	0.131	0.137	0.13	0.13	0.134		23	0.118	0.122	0.121	0.112	0.109	0.116	0.107	0.111	0.111	0.108	0.108	0.12	0.108	0.111	0.114
23.25	0.357	0.363	0.382	0.734	0.693	0.693	1.376	1.415	1.461	1.407	1.461	1.448	1.292	1.319	1.308		23.25	0.773	0.828	0.787	0.747	0.741	0.825	0.129	0.127	0.135	0.135	0.132	0.138	0.13	0.131	0.135		23.25	0.119	0.122	0.122	0.112	0.109	0.116	0.107	0.111	0.111	0.108	0.108	0.121	0.108	0.111	0.113
23.5	0.357	0.363	0.381	0.73	0.696	0.693	1.378	1.413	1.47	1.401	1.452	1.446	1.291	1.318	1.307		23.5	0.77	0.834	0.788	0.748	0.748	0.83	0.129	0.127	0.135	0.134	0.132	0.137	0.132	0.131	0.136		23.5	0.119	0.123	0.123	0.112	0.109	0.116	0.107	0.111	0.111	0.108	0.108	0.121	0.108	0.111	0.113
23.75	0.357	0.363	0.381	0.729	0.696	0.693	1.38	1.416	1.478	1.398	1.449	1.444	1.293	1.32	1.31		23.75	0.794	0.845	0.806	0.79	0.798	0.844	0.129	0.127	0.135	0.135	0.132	0.137	0.128	0.131	0.135		23.75	0.12	0.124	0.123	0.112	0.108	0.116	0.107	0.111	0.111	0.108	0.108	0.121	0.109	0.112	0.113
24	0.356	0.363	0.38	0.728	0.697	0.692	1.389	1.421	1.49	1.406	1.453	1.453	1.295	1.322	1.313		24	0.783	0.847	0.798	0.777	0.773	0.849	0.129	0.127	0.136	0.134	0.131	0.137	0.129	0.131	0.135		24	0.12	0.124	0.124	0.112	0.108	0.116	0.107	0.111	0.111	0.108	0.108	0.121	0.109	0.111	0.114
24.25	0.355	0.362	0.38	0.726	0.693	0.687	1.381	1.419	1.492	1.405	1.449	1.451	1.296	1.323	1.315		24.25	0.81	0.862	0.824	0.837	0.846	0.88	0.13	0.127	0.136	0.135	0.133	0.137	0.132	0.131	0.136		24.25	0.121	0.125	0.125	0.112	0.109	0.116	0.107	0.111	0.111	0.108	0.108	0.121	0.109	0.112	0.116
24.5	0.356	0.363	0.379	0.724	0.693	0.688	1.392	1.419	1.494	1.397	1.438	1.444	1.295	1.322	1.315		24.5	0.78	0.847	0.803	0.81	0.811	0.876	0.13	0.127	0.136	0.134	0.131	0.138	0.13	0.131	0.136		24.5	0.122	0.125	0.126	0.112	0.109	0.116	0.107	0.111	0.111	0.108	0.108	0.121	0.108	0.112	0.116
24.75	0.356	0.362	0.38	0.729	0.698	0.694	1.401	1.426	1.503	1.407	1.444	1.451	1.301	1.327	1.32		24.75	0.811	0.867	0.828	0.89	0.899	0.92	0.13	0.128	0.136	0.133	0.132	0.137	0.132	0.132	0.136		24.75	0.123	0.126	0.127	0.112	0.109	0.116	0.107	0.111	0.111	0.108	0.108	0.12	0.108	0.112	0.115
25	0.357	0.362	0.38	0.729	0.699	0.696	1.393	1.44	1.506	1.406	1.447	1.452	1.305	1.332	1.324		25	0.82	0.872	0.832	0.918	0.93	0.936	0.13	0.128	0.137	0.134	0.131	0.137	0.131	0.131	0.136		25	0.124	0.127	0.128	0.113	0.109	0.116	0.107	0.111	0.111	0.108	0.108	0.12	0.108	0.111	0.114
25.25	0.356	0.362	0.379	0.721	0.691	0.686	1.381	1.429	1.509	1.396	1.438	1.441	1.298	1.327	1.32		25.25	0.805	0.862	0.813	0.874	0.873	0.919	0.13	0.128	0.137	0.134	0.132	0.138	0.133	0.132	0.136		25.25	0.125	0.128	0.129	0.112	0.109	0.116	0.107	0.111	0.111	0.108	0.108	0.121	0.108	0.112	0.115
25.5	0.357	0.363	0.38	0.726	0.698	0.695	1.382	1.423	1.508	1.4	1.438	1.444	1.304	1.331	1.325		25.5	0.819	0.874	0.83	0.895	0.9	0.93	0.129	0.128	0.136	0.133	0.132	0.137	0.133	0.132	0.136		25.5	0.125	0.129	0.13	0.112	0.109	0.117	0.107	0.112	0.111	0.108	0.109	0.121	0.108	0.112	0.115
25.75	0.357	0.363	0.38	0.727	0.7	0.696	1.329	1.411	1.51	1.402	1.437	1.443	1.308	1.333	1.327		25.75	0.819	0.875	0.823	0.92	0.931	0.947	0.13	0.128	0.137	0.134	0.132	0.137	0.13	0.132	0.137		25.75	0.126	0.13	0.131	0.112	0.109	0.116	0.107	0.111	0.111	0.108	0.108	0.121	0.108	0.112	0.115
26	0.356	0.362	0.379	0.725	0.701	0.696	1.291	1.396	1.509	1.401	1.435	1.442	1.305	1.33	1.326		26	0.811	0.873	0.827	0.91	0.917	0.945	0.131	0.128	0.137	0.133	0.132	0.138	0.131	0.133	0.137		26	0.128	0.131	0.132	0.113	0.109	0.117	0.107	0.111	0.111	0.108	0.108	0.121	0.108	0.112	0.115
26.25	0.357	0.362	0.38	0.73	0.709	0.705	1.311	1.401	1.508	1.408	1.437	1.446	1.31	1.334	1.329		26.25	0.842	0.889	0.852	0.996	1.008	1.009	0.132	0.128	0.138	0.133	0.133	0.138	0.132	0.133	0.137		26.25	0.129	0.132	0.133	0.112	0.109	0.117	0.107	0.111	0.111	0.108	0.109	0.12	0.108	0.112	0.116
26.5	0.356	0.361	0.378	0.722	0.702	0.697	1.313	1.402	1.513	1.401	1.43	1.439	1.306	1.332	1.328		26.5	0.847	0.898	0.857	1.036	1.054	1.033	0.132	0.128	0.137	0.132	0.132	0.138	0.133	0.133	0.136		26.5	0.13	0.133	0.135	0.112	0.109	0.117	0.107	0.111	0.111	0.108	0.108	0.12	0.108	0.111	0.116
26.75	0.356	0.362	0.379	0.728	0.705	0.702	1.335	1.392	1.515	1.411	1.436	1.446	1.312	1.337	1.335		26.75	0.851	0.905	0.86	1.043	1.054	1.046	0.131	0.128	0.138	0.132	0.131	0.138	0.134	0.132	0.137		26.75	0.131	0.135	0.137	0.115	0.109	0.117	0.107	0.111	0.111	0.11	0.108	0.121	0.109	0.112	0.115
27	0.356	0.362	0.378	0.732	0.712	0.708	1.349	1.378	1.512	1.418	1.44	1.45	1.315	1.341	1.34		27	0.846	0.904	0.865	1.015	1.025	1.023	0.13	0.128	0.137	0.132	0.132	0.132	0.133	0.132	0.137		27	0.133	0.136	0.138	0.115	0.109	0.117	0.107	0.111	0.111	0.122	0.109	0.122	0.109	0.112	0.115
27.25	0.355	0.361	0.378	0.736	0.718	0.7	1.372	1.39	1.516	1.429	1.45	1.461	1.322	1.348	1.348		27.25	0.862	0.911	0.875	1.088	1.101	1.082	0.13	0.128	0.138	0.133	0.131	0.132	0.134	0.132	0.137		27.25	0.134	0.137	0.139	0.115	0.109	0.117	0.107	0.111	0.111	0.112	0.109	0.121	0.111	0.112	0.116
27.5	0.354	0.36	0.377	0.737	0.717	0.692	1.389	1.408	1.521	1.423	1.444	1.454	1.317	1.348	1.349		27.5	0.867	0.919	0.88	1.099	1.118	1.093	0.131	0.128	0.138	0.132	0.132	0.132	0.132	0.132	0.138		27.5	0.135	0.139	0.141	0.115	0.109	0.117	0.108	0.112	0.112	0.108	0.108	0.119	0.108	0.112	0.115
27.75	0.355	0.361	0.378	0.741	0.722	0.655	1.403	1.415	1.514	1.424	1.445	1.457	1.321	1.348	1.352		27.75	0.88	0.927	0.892	1.151	1.173	1.134	0.132	0.13	0.138	0.132	0.131	0.13	0.13	0.132	0.134		27.75	0.137	0.141	0.143	0.115	0.109	0.117	0.108	0.112	0.111	0.108	0.109	0.122	0.11	0.112	0.115
28	0.355	0.36	0.377	0.74	0.72	0.627	1.419	1.425	1.512	1.429	1.448	1.461	1.322	1.35	1.353		28	0.873	0.922	0.879	1.139	1.155	1.132	0.132	0.13	0.138	0.133	0.133	0.131	0.129	0.133	0.138		28	0.139	0.143	0.145	0.115	0.109	0.117	0.108	0.111	0.111	0.108	0.109	0.122	0.11	0.112	0.116
28.25	0.356	0.361	0.378	0.745	0.728	0.558	1.428	1.432	1.507	1.427	1.448	1.459	1.323	1.35	1.355		28.25	0.864	0.921	0.875	1.058	1.083	1.071	0.131	0.13	0.138	0.132	0.131	0.131	0.126	0.133	0.135		28.25	0.141	0.144	0.147	0.115	0.109	0.117	0.107	0.111	0.111	0.108	0.132	0.122	0.113	0.112	0.116
28.5	0.356	0.361	0.378	0.746	0.73	0.577	1.439	1.439	1.507	1.43	1.448	1.461	1.324	1.352	1.357		28.5	0.877	0.93	0.891	1.153	1.181	1.155	0.131	0.13	0.138	0.132	0.132	0.131	0.128	0.134	0.136		28.5	0.143	0.146	0.149	0.115	0.109	0.117	0.107	0.111	0.111	0.11	0.117	0.119	0.113	0.112	0.114
28.75	0.356	0.361	0.378	0.752	0.737	0.593	1.444	1.442	1.502	1.431	1.451	1.461	1.325	1.352	1.359		28.75	0.884	0.936	0.895	1.194	1.218	1.179	0.131	0.13	0.138	0.133	0.132	0.131	0.129	0.135	0.136		28.75	0.146	0.149	0.153	0.115	0.109	0.118	0.107	0.112	0.111	0.109	0.117	0.12	0.114	0.112	0.114
29	0.357	0.362	0.379	0.756	0.746	0.606	1.444	1.439	1.497	1.437	1.454	1.465	1.326	1.355	1.362		29	0.884	0.933	0.894	1.201	1.216	1.188	0.131	0.13	0.139	0.133	0.132	0.13	0.131	0.134	0.136		29	0.149	0.152	0.155	0.115	0.109	0.118	0.107	0.112	0.111	0.112	0.113	0.12	0.113	0.112	0.116
29.25	0.356	0.361	0.377	0.637	0.758	0.622	1.457	1.449	1.505	1.451	1.466	1.478	1.333	1.362	1.369		29.25	0.881	0.933	0.893	1.18	1.192	1.166	0.131	0.13	0.139	0.133	0.133	0.131	0.13	0.134	0.139		29.25	0.151	0.154	0.158	0.115	0.109	0.118	0.107	0.112	0.111	0.11	0.127	0.121	0.11	0.112	0.117
29.5	0.356	0.361	0.377	0.582	0.66	0.643	1.453	1.443	1.499	1.449	1.466	1.476	1.335	1.365	1.374		29.5	0.884	0.934	0.895	1.165	1.175	1.168	0.131	0.13	0.139	0.134	0.133	0.132	0.134	0.135	0.14		29.5	0.153	0.156	0.16	0.115	0.109	0.118	0.107	0.112	0.111	0.113	0.116	0.121	0.113	0.112	0.116
29.75	0.355	0.36	0.376	0.567	0.637	0.652	1.466	1.454	1.505	1.455	1.471	1.482	1.338	1.37	1.382		29.75	0.894	0.939	0.909	1.252	1.263	1.236	0.131	0.13	0.139	0.136	0.133	0.133	0.133	0.135	0.14		29.75	0.155	0.159	0.163	0.115	0.109	0.118	0.107	0.112	0.111	0.131	0.129	0.121	0.112	0.112	0.115
30	0.355	0.36	0.376	0.591	0.655	0.683	1.455	1.443	1.498	1.479	1.493	1.5	1.351	1.379	1.391		30	0.894	0.941	0.905	1.207	1.216	1.21	0.13	0.131	0.139	0.134	0.135	0.134	0.133	0.137	0.138		30	0.158	0.162	0.166	0.115	0.109	0.118	0.107	0.111	0.111	0.133	0.126	0.121	0.112	0.112	0.115
30.25	0.356	0.361	0.377	0.585	0.624	0.671	1.452	1.44	1.493	1.468	1.481	1.492	1.343	1.374	1.388		30.25	0.895	0.948	0.906	1.188	1.191	1.188	0.131	0.13	0.138	0.129	0.133	0.133	0.136	0.137	0.14		30.25	0.162	0.165	0.169	0.115	0.109	0.118	0.107	0.112	0.111	0.108	0.118	0.122	0.112	0.112	0.12
30.5	0.356	0.361	0.377	0.609	0.66	0.678	1.447	1.435	1.486	1.468	1.48	1.49	1.345	1.375	1.389		30.5	0.897	0.944	0.913	1.222	1.224	1.227	0.131	0.13	0.139	0.135	0.131	0.135	0.138	0.136	0.14		30.5	0.164	0.168	0.172	0.115	0.109	0.118	0.107	0.111	0.111	0.108	0.109	0.121	0.108	0.112	0.114
30.75	0.357	0.361	0.377	0.633	0.688	0.71	1.441	1.428	1.482	1.48	1.49	1.499	1.35	1.379	1.393		30.75	0.903	0.948	0.919	1.265	1.252	1.264	0.132	0.131	0.139	0.135	0.134	0.135	0.139	0.136	0.14		30.75	0.168	0.172	0.176	0.115	0.109	0.118	0.107	0.112	0.111	0.108	0.109	0.122	0.114	0.112	0.115
31	0.357	0.361	0.377	0.645	0.707	0.717	1.439	1.427	1.48	1.479	1.489	1.497	1.35	1.379	1.396		31	0.904	0.947	0.92	1.285	1.263	1.272	0.131	0.13	0.139	0.135	0.134	0.133	0.138	0.135	0.141		31	0.173	0.176	0.181	0.115	0.109	0.118	0.107	0.112	0.111	0.108	0.109	0.122	0.112	0.112	0.114
31.25	0.357	0.362	0.377	0.659	0.728	0.739	1.44	1.428	1.479	1.486	1.496	1.504	1.351	1.381	1.399		31.25	0.909	0.953	0.921	1.328	1.323	1.301	0.131	0.131	0.139	0.137	0.136	0.132	0.135	0.137	0.141		31.25	0.176	0.181	0.185	0.115	0.109	0.118	0.107	0.111	0.111	0.108	0.13	0.122	0.114	0.112	0.114
31.5	0.356	0.361	0.377	0.664	0.728	0.728	1.443	1.431	1.482	1.48	1.491	1.501	1.35	1.38	1.397		31.5	0.903	0.949	0.91	1.273	1.254	1.255	0.131	0.13	0.139	0.126	0.124	0.13	0.131	0.137	0.132		31.5	0.181	0.185	0.191	0.116	0.109	0.119	0.107	0.111	0.111	0.108	0.115	0.125	0.114	0.112	0.114
31.75	0.355	0.36	0.376	0.717	0.764	0.784	1.447	1.436	1.485	1.492	1.502	1.514	1.355	1.387	1.408		31.75	0.915	0.963	0.932	1.356	1.343	1.333	0.131	0.13	0.139	0.127	0.125	0.131	0.131	0.138	0.132		31.75	0.184	0.188	0.194	0.115	0.109	0.118	0.107	0.111	0.111	0.108	0.109	0.124	0.116	0.112	0.118
32	0.355	0.36	0.375	0.723	0.76	0.742	1.45	1.44	1.485	1.48	1.489	1.502	1.353	1.384	1.402		32	0.915	0.958	0.933	1.368	1.367	1.341	0.133	0.131	0.139	0.133	0.124	0.133	0.137	0.138	0.134		32	0.189	0.193	0.2	0.115	0.109	0.118	0.107	0.112	0.111	0.108	0.119	0.125	0.114	0.112	0.116
32.25	0.356	0.36	0.376	0.74	0.778	0.774	1.438	1.428	1.477	1.487	1.493	1.507	1.357	1.387	1.407		32.25	0.916	0.959	0.929	1.362	1.356	1.344	0.132	0.131	0.14	0.136	0.124	0.132	0.13	0.139	0.132		32.25	0.194	0.198	0.205	0.115	0.109	0.118	0.107	0.111	0.111	0.108	0.131	0.124	0.11	0.112	0.116
32.5	0.356	0.36	0.376	0.762	0.806	0.825	1.44	1.431	1.48	1.505	1.514	1.526	1.367	1.397	1.419		32.5	0.925	0.97	0.939	1.391	1.377	1.369	0.133	0.131	0.14	0.138	0.126	0.133	0.131	0.14	0.135		32.5	0.2	0.204	0.211	0.116	0.109	0.118	0.107	0.111	0.111	0.108	0.115	0.124	0.11	0.112	0.122
32.75	0.357	0.36	0.377	0.767	0.813	0.83	1.422	1.413	1.465	1.507	1.516	1.526	1.369	1.399	1.421		32.75	0.925	0.97	0.929	1.363	1.352	1.357	0.132	0.131	0.14	0.13	0.132	0.135	0.132	0.141	0.132		32.75	0.206	0.211	0.217	0.115	0.109	0.118	0.106	0.111	0.111	0.108	0.127	0.126	0.112	0.112	0.114
33	0.358	0.361	0.378	0.777	0.82	0.836	1.416	1.408	1.458	1.51	1.517	1.528	1.373	1.402	1.424		33	0.917	0.96	0.923	1.362	1.35	1.357	0.133	0.131	0.14	0.137	0.126	0.134	0.13	0.14	0.133		33	0.211	0.216	0.222	0.115	0.109	0.118	0.107	0.111	0.111	0.108	0.131	0.125	0.108	0.118	0.114
33.25	0.358	0.362	0.378	0.792	0.838	0.855	1.414	1.407	1.456	1.51	1.517	1.528	1.375	1.402	1.426		33.25	0.921	0.964	0.925	1.349	1.333	1.357	0.131	0.132	0.14	0.14	0.128	0.135	0.132	0.14	0.134		33.25	0.217	0.223	0.231	0.115	0.109	0.118	0.106	0.111	0.111	0.136	0.134	0.126	0.114	0.123	0.114
33.5	0.357	0.361	0.377	0.791	0.841	0.867	1.421	1.413	1.458	1.511	1.518	1.531	1.373	1.402	1.427		33.5	0.918	0.958	0.92	1.365	1.35	1.363	0.129	0.131	0.141	0.128	0.128	0.135	0.131	0.14	0.133		33.5	0.227	0.232	0.239	0.115	0.109	0.119	0.107	0.112	0.111	0.135	0.131	0.126	0.119	0.123	0.114
33.75	0.357	0.361	0.377	0.803	0.859	0.889	1.419	1.411	1.456	1.516	1.523	1.535	1.378	1.406	1.433		33.75	0.924	0.961	0.931	1.387	1.367	1.387	0.132	0.132	0.14	0.138	0.129	0.135	0.131	0.139	0.134		33.75	0.236	0.241	0.248	0.115	0.11	0.119	0.107	0.112	0.111	0.126	0.128	0.125	0.109	0.113	0.113
34	0.358	0.361	0.377	0.815	0.86	0.895	1.42	1.413	1.451	1.513	1.521	1.533	1.376	1.405	1.432		34	0.931	0.966	0.94	1.407	1.39	1.395	0.133	0.132	0.141	0.138	0.128	0.134	0.13	0.139	0.134		34	0.243	0.248	0.257	0.116	0.11	0.119	0.107	0.112	0.111	0.127	0.134	0.125	0.115	0.123	0.113
34.25	0.357	0.361	0.377	0.845	0.898	0.933	1.416	1.41	1.454	1.523	1.53	1.543	1.383	1.413	1.44		34.25	0.931	0.963	0.935	1.398	1.384	1.393	0.134	0.132	0.141	0.13	0.129	0.134	0.134	0.141	0.134		34.25	0.253	0.258	0.266	0.116	0.11	0.119	0.107	0.112	0.111	0.136	0.136	0.125	0.109	0.121	0.113
34.5	0.357	0.361	0.376	0.857	0.909	0.944	1.415	1.409	1.45	1.527	1.534	1.546	1.391	1.419	1.445		34.5	0.939	0.973	0.944	1.426	1.4	1.416	0.133	0.131	0.141	0.138	0.127	0.134	0.134	0.141	0.134		34.5	0.262	0.267	0.276	0.116	0.11	0.119	0.107	0.112	0.111	0.135	0.127	0.126	0.11	0.12	0.113
34.75	0.358	0.362	0.377	0.85	0.903	0.94	1.411	1.405	1.445	1.526	1.532	1.546	1.389	1.418	1.446		34.75	0.932	0.964	0.941	1.419	1.411	1.41	0.133	0.132	0.141	0.14	0.13	0.135	0.134	0.141	0.135		34.75	0.272	0.278	0.285	0.115	0.109	0.119	0.107	0.112	0.111	0.13	0.125	0.126	0.111	0.12	0.113
35	0.358	0.361	0.376	0.847	0.904	0.94	1.417	1.411	1.45	1.528	1.532	1.549	1.391	1.42	1.448		35	0.938	0.968	0.947	1.425	1.42	1.419	0.132	0.132	0.141	0.137	0.139	0.137	0.134	0.14	0.134		35	0.28	0.287	0.296	0.115	0.109	0.119	0.107	0.112	0.111	0.135	0.137	0.126	0.119	0.12	0.113
35.25	0.359	0.362	0.377	0.876	0.926	0.958	1.403	1.398	1.438	1.53	1.536	1.551	1.399	1.425	1.453		35.25	0.942	0.976	0.95	1.442	1.432	1.429	0.133	0.132	0.141	0.137	0.141	0.135	0.141	0.142	0.136		35.25	0.292	0.299	0.307	0.115	0.109	0.119	0.107	0.112	0.111	0.13	0.11	0.126	0.125	0.131	0.113
35.5	0.359	0.362	0.378	0.87	0.923	0.955	1.405	1.4	1.437	1.531	1.536	1.554	1.399	1.426	1.455		35.5	0.936	0.967	0.939	1.43	1.417	1.424	0.133	0.132	0.141	0.138	0.135	0.134	0.139	0.139	0.134		35.5	0.303	0.312	0.32	0.115	0.109	0.12	0.107	0.112	0.111	0.136	0.111	0.126	0.117	0.127	0.113
35.75	0.358	0.362	0.377	0.868	0.928	0.969	1.412	1.405	1.441	1.532	1.535	1.555	1.397	1.425	1.456		35.75	0.931	0.958	0.939	1.429	1.421	1.421	0.133	0.132	0.141	0.139	0.141	0.135	0.143	0.14	0.135		35.75	0.318	0.327	0.332	0.115	0.109	0.12	0.108	0.112	0.111	0.136	0.109	0.126	0.115	0.117	0.118
36	0.359	0.362	0.377	0.886	0.941	0.98	1.408	1.401	1.437	1.535	1.538	1.558	1.398	1.426	1.457		36	0.933	0.957	0.94	1.431	1.421	1.422	0.134	0.132	0.142	0.132	0.133	0.137	0.141	0.14	0.135		36	0.331	0.339	0.345	0.116	0.109	0.12	0.108	0.112	0.112	0.13	0.109	0.126	0.109	0.123	0.117
36.25	0.356	0.361	0.376	0.9	0.953	0.995	1.407	1.4	1.438	1.541	1.544	1.563	1.402	1.431	1.463		36.25	0.938	0.962	0.944	1.441	1.43	1.428	0.133	0.132	0.141	0.14	0.141	0.135	0.142	0.142	0.135		36.25	0.34	0.349	0.354	0.116	0.109	0.12	0.108	0.112	0.112	0.134	0.109	0.126	0.118	0.124	0.117
36.5	0.356	0.361	0.375	0.943	0.986	1.018	1.401	1.395	1.433	1.543	1.547	1.567	1.412	1.44	1.472		36.5	0.945	0.974	0.959	1.456	1.451	1.442	0.133	0.133	0.141	0.142	0.142	0.136	0.142	0.142	0.136		36.5	0.35	0.359	0.364	0.116	0.11	0.121	0.108	0.112	0.111	0.133	0.109	0.126	0.118	0.123	0.117
36.75	0.357	0.361	0.376	0.938	0.981	1.008	1.401	1.394	1.429	1.546	1.551	1.572	1.418	1.444	1.476		36.75	0.946	0.966	0.951	1.46	1.452	1.44	0.133	0.133	0.142	0.139	0.142	0.136	0.14	0.141	0.135		36.75	0.359	0.368	0.375	0.116	0.11	0.121	0.108	0.112	0.111	0.109	0.109	0.126	0.112	0.124	0.117
37	0.356	0.36	0.375	0.957	0.998	1.026	1.399	1.393	1.43	1.547	1.55	1.573	1.424	1.45	1.482		37	0.951	0.971	0.965	1.468	1.463	1.443	0.133	0.133	0.141	0.138	0.14	0.136	0.142	0.141	0.144		37	0.366	0.376	0.382	0.116	0.11	0.121	0.108	0.112	0.111	0.117	0.109	0.125	0.114	0.125	0.117
37.25	0.357	0.361	0.376	0.966	1	1.022	1.394	1.388	1.422	1.546	1.548	1.574	1.425	1.452	1.486		37.25	0.944	0.964	0.966	1.456	1.454	1.428	0.134	0.133	0.141	0.13	0.138	0.138	0.134	0.142	0.136		37.25	0.377	0.386	0.39	0.116	0.11	0.121	0.108	0.112	0.111	0.109	0.109	0.126	0.109	0.124	0.117
37.5	0.356	0.359	0.375	0.96	1.005	1.039	1.408	1.401	1.432	1.554	1.557	1.583	1.426	1.456	1.491		37.5	0.954	0.98	0.974	1.472	1.463	1.442	0.133	0.132	0.141	0.139	0.131	0.139	0.134	0.142	0.137		37.5	0.386	0.395	0.397	0.116	0.11	0.12	0.107	0.112	0.111	0.109	0.12	0.126	0.125	0.123	0.119
37.75	0.356	0.359	0.375	0.979	1.019	1.046	1.401	1.393	1.427	1.552	1.555	1.581	1.431	1.461	1.496		37.75	0.952	0.971	0.968	1.47	1.461	1.427	0.134	0.132	0.141	0.129	0.132	0.137	0.131	0.141	0.137		37.75	0.394	0.402	0.406	0.116	0.109	0.121	0.107	0.112	0.111	0.108	0.119	0.127	0.116	0.123	0.12
38	0.356	0.36	0.375	0.966	1.01	1.037	1.398	1.39	1.422	1.551	1.555	1.583	1.429	1.46	1.497		38	0.949	0.965	0.971	1.471	1.466	1.432	0.135	0.132	0.141	0.129	0.128	0.137	0.131	0.141	0.136		38	0.403	0.411	0.415	0.116	0.109	0.121	0.107	0.112	0.111	0.108	0.13	0.125	0.125	0.123	0.13
38.25	0.356	0.36	0.375	0.964	1.01	1.038	1.397	1.39	1.42	1.552	1.555	1.584	1.43	1.462	1.501		38.25	0.945	0.958	0.969	1.468	1.468	1.423	0.135	0.133	0.142	0.132	0.129	0.141	0.132	0.143	0.138		38.25	0.412	0.421	0.424	0.116	0.11	0.121	0.108	0.112	0.111	0.109	0.129	0.128	0.121	0.123	0.13
38.5	0.357	0.36	0.376	0.962	1.009	1.036	1.397	1.39	1.416	1.552	1.555	1.585	1.431	1.462	1.501		38.5	0.936	0.946	0.963	1.457	1.458	1.408	0.135	0.133	0.142	0.129	0.13	0.14	0.132	0.141	0.137		38.5	0.421	0.429	0.432	0.116	0.109	0.121	0.108	0.112	0.111	0.137	0.128	0.128	0.108	0.122	0.13
38.75	0.356	0.36	0.375	0.958	1.006	1.041	1.403	1.396	1.423	1.553	1.555	1.585	1.43	1.463	1.503		38.75	0.954	0.963	0.978	1.468	1.452	1.402	0.136	0.134	0.142	0.13	0.126	0.135	0.131	0.14	0.136		38.75	0.427	0.436	0.441	0.116	0.11	0.122	0.108	0.112	0.112	0.109	0.123	0.128	0.108	0.123	0.132
39	0.358	0.361	0.376	0.966	1.012	1.037	1.393	1.386	1.413	1.55	1.555	1.585	1.435	1.467	1.506		39	0.966	0.978	0.982	1.484	1.468	1.415	0.136	0.134	0.142	0.129	0.138	0.136	0.13	0.142	0.135		39	0.435	0.445	0.45	0.116	0.11	0.122	0.108	0.112	0.112	0.109	0.112	0.131	0.108	0.123	0.124
39.25	0.358	0.361	0.376	0.979	1.024	1.051	1.396	1.39	1.414	1.552	1.556	1.585	1.436	1.469	1.509		39.25	0.965	0.974	0.984	1.473	1.472	1.411	0.137	0.134	0.141	0.129	0.142	0.136	0.13	0.142	0.136		39.25	0.444	0.455	0.459	0.116	0.11	0.122	0.108	0.112	0.111	0.136	0.134	0.125	0.108	0.123	0.118
39.5	0.358	0.361	0.375	0.968	1.016	1.047	1.399	1.392	1.416	1.555	1.558	1.589	1.436	1.47	1.51		39.5	0.963	0.977	0.988	1.478	1.48	1.413	0.136	0.135	0.142	0.129	0.141	0.137	0.131	0.142	0.136		39.5	0.454	0.462	0.464	0.116	0.109	0.122	0.108	0.112	0.111	0.137	0.128	0.127	0.126	0.124	0.115
39.75	0.356	0.359	0.373	0.958	1.012	1.068	1.41	1.402	1.425	1.554	1.556	1.588	1.43	1.468	1.51		39.75	0.969	0.982	0.985	1.474	1.484	1.406	0.137	0.134	0.141	0.127	0.14	0.137	0.13	0.141	0.135		39.75	0.46	0.47	0.473	0.116	0.109	0.122	0.108	0.112	0.111	0.109	0.129	0.122	0.125	0.123	0.114
40	0.356	0.359	0.373	0.962	1.03	1.077	1.417	1.41	1.432	1.561	1.563	1.596	1.432	1.47	1.512		40	0.96	0.972	0.98	1.471	1.477	1.397	0.136	0.135	0.142	0.13	0.138	0.136	0.13	0.141	0.136		40	0.467	0.478	0.481	0.116	0.11	0.122	0.107	0.112	0.111	0.109	0.111	0.123	0.117	0.124	0.131
40.25	0.357	0.359	0.374	1.033	1.071	1.093	1.404	1.399	1.422	1.566	1.57	1.602	1.454	1.486	1.526		40.25	0.959	0.974	0.984	1.473	1.474	1.404	0.138	0.133	0.143	0.13	0.139	0.138	0.13	0.142	0.137		40.25	0.475	0.486	0.489	0.116	0.11	0.123	0.107	0.112	0.111	0.109	0.109	0.121	0.108	0.125	0.111
40.5	0.358	0.361	0.376	1.016	1.046	1.062	1.394	1.388	1.409	1.56	1.563	1.598	1.456	1.488	1.528		40.5	0.943	0.951	0.969	1.451	1.456	1.39	0.138	0.134	0.143	0.129	0.134	0.136	0.129	0.141	0.136		40.5	0.48	0.494	0.496	0.117	0.11	0.123	0.107	0.112	0.111	0.109	0.109	0.121	0.108	0.122	0.111
40.75	0.359	0.362	0.376	1.017	1.049	1.063	1.393	1.386	1.405	1.557	1.56	1.596	1.457	1.489	1.531		40.75	0.951	0.961	0.977	1.444	1.443	1.38	0.139	0.134	0.144	0.13	0.142	0.136	0.131	0.143	0.136		40.75	0.487	0.502	0.504	0.117	0.11	0.124	0.107	0.112	0.111	0.109	0.109	0.12	0.108	0.12	0.111
41	0.359	0.361	0.376	0.991	1.034	1.062	1.398	1.393	1.407	1.557	1.56	1.596	1.451	1.486	1.531		41	0.953	0.96	0.976	1.455	1.443	1.38	0.138	0.134	0.144	0.131	0.144	0.136	0.131	0.142	0.136		41	0.495	0.51	0.514	0.116	0.109	0.123	0.107	0.111	0.111	0.109	0.111	0.12	0.108	0.122	0.111
41.25	0.358	0.36	0.374	0.967	1.027	1.071	1.412	1.408	1.418	1.559	1.561	1.6	1.446	1.484	1.53		41.25	0.955	0.961	0.979	1.451	1.441	1.389	0.138	0.135	0.144	0.129	0.139	0.137	0.13	0.141	0.136		41.25	0.503	0.519	0.521	0.116	0.11	0.123	0.107	0.111	0.111	0.109	0.111	0.12	0.109	0.131	0.111
41.5	0.358	0.36	0.374	1.011	1.061	1.088	1.4	1.397	1.415	1.562	1.565	1.602	1.451	1.49	1.537		41.5	0.95	0.956	0.98	1.431	1.442	1.387	0.139	0.135	0.145	0.13	0.14	0.136	0.13	0.141	0.136		41.5	0.507	0.526	0.526	0.116	0.11	0.124	0.107	0.111	0.111	0.109	0.14	0.118	0.109	0.131	0.111
41.75	0.357	0.359	0.374	0.987	1.048	1.087	1.416	1.413	1.422	1.567	1.57	1.611	1.45	1.49	1.539		41.75	0.962	0.969	0.993	1.458	1.453	1.405	0.136	0.136	0.145	0.131	0.141	0.135	0.131	0.142	0.137		41.75	0.515	0.533	0.534	0.116	0.11	0.124	0.107	0.112	0.111	0.109	0.129	0.116	0.109	0.126	0.111
42	0.359	0.36	0.374	1.015	1.06	1.084	1.409	1.404	1.413	1.566	1.57	1.612	1.459	1.498	1.545		42	0.953	0.961	0.985	1.448	1.459	1.393	0.137	0.135	0.144	0.132	0.144	0.136	0.131	0.145	0.139		42	0.522	0.541	0.541	0.116	0.11	0.124	0.107	0.112	0.111	0.11	0.13	0.117	0.108	0.131	0.111
42.25	0.358	0.359	0.373	1.063	1.102	1.124	1.412	1.411	1.422	1.571	1.573	1.614	1.463	1.502	1.549		42.25	0.948	0.956	0.982	1.449	1.462	1.393	0.137	0.136	0.145	0.13	0.145	0.136	0.131	0.142	0.137		42.25	0.53	0.55	0.549	0.116	0.11	0.124	0.108	0.112	0.111	0.109	0.117	0.119	0.109	0.134	0.112
42.5	0.358	0.359	0.373	0.985	1.041	1.089	1.424	1.421	1.424	1.571	1.574	1.619	1.458	1.498	1.548		42.5	0.957	0.97	0.99	1.441	1.449	1.394	0.137	0.136	0.145	0.133	0.143	0.136	0.132	0.142	0.138		42.5	0.538	0.557	0.555	0.116	0.11	0.125	0.108	0.113	0.112	0.11	0.127	0.12	0.109	0.122	0.112
42.75	0.359	0.36	0.374	1.045	1.083	1.106	1.408	1.406	1.416	1.572	1.574	1.616	1.471	1.508	1.555		42.75	0.965	0.977	0.999	1.455	1.452	1.405	0.137	0.135	0.144	0.131	0.139	0.136	0.135	0.142	0.138		42.75	0.543	0.561	0.562	0.116	0.11	0.124	0.108	0.113	0.112	0.114	0.135	0.121	0.111	0.13	0.112
43	0.36	0.36	0.375	1.007	1.053	1.079	1.41	1.406	1.408	1.57	1.572	1.616	1.468	1.508	1.557		43	0.952	0.962	0.985	1.44	1.41	1.387	0.138	0.135	0.143	0.13	0.134	0.135	0.131	0.141	0.137		43	0.55	0.57	0.567	0.116	0.11	0.125	0.108	0.113	0.112	0.124	0.134	0.12	0.109	0.13	0.112
43.25	0.36	0.361	0.375	1.034	1.07	1.088	1.406	1.403	1.404	1.568	1.568	1.612	1.47	1.511	1.561		43.25	0.942	0.95	0.978	1.423	1.406	1.378	0.138	0.136	0.144	0.134	0.127	0.135	0.131	0.143	0.138		43.25	0.556	0.576	0.574	0.116	0.11	0.125	0.108	0.113	0.112	0.132	0.113	0.117	0.11	0.13	0.111
43.5	0.361	0.362	0.376	1.033	1.071	1.087	1.41	1.407	1.403	1.567	1.569	1.614	1.469	1.511	1.563		43.5	0.948	0.955	0.985	1.429	1.399	1.383	0.133	0.135	0.145	0.133	0.14	0.136	0.132	0.143	0.138		43.5	0.562	0.583	0.582	0.116	0.11	0.126	0.108	0.113	0.112	0.135	0.131	0.117	0.109	0.132	0.111
43.75	0.361	0.362	0.376	1.008	1.053	1.078	1.415	1.411	1.404	1.568	1.569	1.615	1.469	1.51	1.563		43.75	0.953	0.963	0.992	1.431	1.377	1.382	0.138	0.134	0.144	0.141	0.14	0.135	0.132	0.143	0.137		43.75	0.569	0.589	0.586	0.116	0.11	0.126	0.108	0.113	0.112	0.131	0.129	0.117	0.108	0.133	0.112
44	0.361	0.362	0.376	1.016	1.061	1.087	1.42	1.416	1.406	1.569	1.571	1.614	1.468	1.511	1.566		44	0.951	0.957	0.989	1.417	1.378	1.373	0.137	0.134	0.144	0.142	0.14	0.137	0.132	0.143	0.139		44	0.575	0.595	0.592	0.116	0.11	0.126	0.108	0.114	0.112	0.139	0.127	0.117	0.108	0.134	0.112
44.25	0.361	0.362	0.375	1.031	1.069	1.09	1.415	1.413	1.403	1.566	1.567	1.608	1.47	1.514	1.567		44.25	0.946	0.951	0.986	1.407	1.369	1.366	0.137	0.134	0.144	0.13	0.14	0.136	0.132	0.143	0.138		44.25	0.582	0.603	0.593	0.116	0.11	0.126	0.108	0.114	0.112	0.137	0.123	0.117	0.108	0.13	0.112
44.5	0.362	0.362	0.376	1.039	1.075	1.092	1.41	1.408	1.4	1.567	1.568	1.607	1.474	1.518	1.571		44.5	0.955	0.963	0.997	1.422	1.37	1.378	0.136	0.135	0.143	0.134	0.14	0.135	0.132	0.142	0.138		44.5	0.588	0.608	0.595	0.116	0.11	0.127	0.108	0.113	0.112	0.129	0.129	0.117	0.109	0.132	0.112
44.75	0.36	0.361	0.374	1.079	1.105	1.122	1.421	1.421	1.411	1.575	1.575	1.613	1.475	1.521	1.576		44.75	0.978	0.989	1.008	1.448	1.38	1.409	0.138	0.136	0.144	0.129	0.126	0.134	0.132	0.142	0.136		44.75	0.594	0.615	0.599	0.117	0.11	0.127	0.108	0.114	0.112	0.123	0.116	0.118	0.109	0.133	0.112
45	0.36	0.362	0.374	1.046	1.083	1.105	1.43	1.426	1.41	1.576	1.576	1.616	1.477	1.523	1.579		45	0.977	0.99	1.012	1.438	1.395	1.41	0.138	0.136	0.142	0.13	0.127	0.135	0.131	0.14	0.136		45	0.599	0.62	0.597	0.117	0.111	0.127	0.108	0.113	0.112	0.126	0.133	0.119	0.111	0.132	0.112
45.25	0.361	0.362	0.375	1.084	1.11	1.124	1.42	1.42	1.407	1.575	1.574	1.611	1.482	1.527	1.582		45.25	0.98	0.992	1.017	1.421	1.38	1.393	0.138	0.133	0.144	0.13	0.14	0.136	0.132	0.142	0.136		45.25	0.601	0.623	0.598	0.117	0.111	0.128	0.108	0.113	0.112	0.138	0.132	0.12	0.11	0.133	0.112
45.5	0.362	0.362	0.375	1.069	1.096	1.107	1.424	1.422	1.403	1.576	1.576	1.613	1.484	1.529	1.585		45.5	0.967	0.977	1.007	1.394	1.372	1.374	0.139	0.133	0.144	0.132	0.14	0.135	0.132	0.143	0.137		45.5	0.605	0.625	0.596	0.116	0.11	0.128	0.108	0.113	0.112	0.138	0.129	0.121	0.111	0.127	0.112
45.75	0.363	0.363	0.376	1.073	1.093	1.101	1.419	1.416	1.396	1.572	1.57	1.606	1.487	1.531	1.587		45.75	0.967	0.978	1.005	1.384	1.356	1.365	0.138	0.136	0.143	0.13	0.131	0.135	0.132	0.141	0.136		45.75	0.603	0.627	0.597	0.116	0.111	0.128	0.108	0.113	0.112	0.136	0.121	0.12	0.115	0.134	0.112
46	0.362	0.363	0.376	1.058	1.089	1.101	1.423	1.422	1.396	1.572	1.571	1.606	1.483	1.53	1.589		46	0.964	0.974	1.004	1.381	1.357	1.357	0.139	0.135	0.141	0.132	0.14	0.135	0.132	0.142	0.137		46	0.607	0.628	0.594	0.117	0.111	0.129	0.108	0.113	0.112	0.137	0.124	0.119	0.108	0.121	0.112
46.25	0.363	0.363	0.376	1.047	1.08	1.094	1.426	1.425	1.396	1.571	1.569	1.604	1.48	1.526	1.587		46.25	0.973	0.982	1.01	1.389	1.365	1.358	0.139	0.136	0.14	0.129	0.141	0.135	0.135	0.142	0.136		46.25	0.61	0.632	0.591	0.117	0.11	0.129	0.108	0.113	0.112	0.135	0.123	0.118	0.109	0.121	0.112
46.5	0.365	0.365	0.377	1.06	1.085	1.092	1.423	1.421	1.392	1.571	1.57	1.602	1.485	1.53	1.591		46.5	0.97	0.977	1.008	1.382	1.367	1.354	0.14	0.136	0.144	0.133	0.141	0.135	0.136	0.143	0.137		46.5	0.611	0.629	0.579	0.117	0.11	0.129	0.108	0.114	0.112	0.132	0.122	0.119	0.109	0.119	0.112
46.75	0.363	0.363	0.376	0.997	1.034	1.067	1.441	1.44	1.402	1.569	1.569	1.603	1.478	1.524	1.588		46.75	0.973	0.978	1.006	1.387	1.374	1.351	0.14	0.135	0.144	0.131	0.136	0.135	0.145	0.144	0.137		46.75	0.612	0.631	0.576	0.117	0.11	0.13	0.108	0.113	0.112	0.134	0.12	0.12	0.109	0.118	0.112
47	0.364	0.364	0.376	1.091	1.114	1.122	1.431	1.431	1.403	1.581	1.579	1.606	1.49	1.533	1.595		47	0.975	0.979	1.008	1.393	1.385	1.356	0.138	0.137	0.144	0.13	0.141	0.135	0.144	0.145	0.137		47	0.611	0.629	0.571	0.117	0.111	0.13	0.109	0.113	0.112	0.114	0.111	0.137	0.109	0.117	0.112
47.25	0.364	0.365	0.376	1.093	1.113	1.119	1.426	1.428	1.401	1.582	1.579	1.603	1.491	1.536	1.598		47.25	0.972	0.976	1.008	1.38	1.376	1.343	0.137	0.136	0.141	0.132	0.142	0.136	0.144	0.145	0.138		47.25	0.607	0.626	0.565	0.117	0.111	0.13	0.108	0.113	0.112	0.111	0.111	0.135	0.109	0.118	0.112
47.5	0.365	0.366	0.377	1.072	1.091	1.095	1.424	1.425	1.39	1.574	1.571	1.596	1.494	1.537	1.6		47.5	0.971	0.975	1.008	1.379	1.373	1.342	0.137	0.136	0.143	0.131	0.142	0.136	0.143	0.145	0.137		47.5	0.603	0.62	0.561	0.117	0.111	0.131	0.108	0.113	0.112	0.126	0.112	0.135	0.109	0.117	0.112
47.75	0.366	0.366	0.378	1.078	1.095	1.098	1.428	1.43	1.39	1.571	1.567	1.59	1.49	1.534	1.599		47.75	0.966	0.969	1.006	1.369	1.364	1.343	0.139	0.135	0.141	0.13	0.142	0.136	0.142	0.146	0.137		47.75	0.596	0.609	0.557	0.117	0.111	0.131	0.108	0.113	0.112	0.129	0.112	0.137	0.109	0.117	0.112
48	0.366	0.367	0.378	1.099	1.115	1.114	1.435	1.435	1.395	1.579	1.574	1.595	1.498	1.541	1.605		48	0.963	0.968	1.005	1.362	1.367	1.346	0.139	0.134	0.142	0.132	0.141	0.138	0.144	0.146	0.138		48	0.573	0.6	0.551	0.117	0.11	0.131	0.108	0.113	0.112	0.109	0.111	0.131	0.135	0.131	0.113
48.25	0.367	0.367	0.378	1.087	1.102	1.099	1.436	1.435	1.391	1.578	1.572	1.593	1.501	1.543	1.607		48.25	0.965	0.97	1.004	1.355	1.354	1.342	0.14	0.135	0.144	0.132	0.14	0.137	0.143	0.144	0.138		48.25	0.568	0.596	0.548	0.117	0.111	0.132	0.108	0.113	0.112	0.123	0.115	0.141	0.125	0.12	0.113
48.5	0.368	0.368	0.379	1.079	1.095	1.09	1.438	1.435	1.387	1.576	1.572	1.59	1.5	1.543	1.608		48.5	0.962	0.964	1.001	1.349	1.356	1.335	0.137	0.136	0.145	0.131	0.14	0.14	0.135	0.145	0.139		48.5	0.565	0.593	0.547	0.117	0.11	0.132	0.108	0.113	0.112	0.14	0.138	0.139	0.115	0.12	0.113
48.75	0.367	0.367	0.378	1.082	1.101	1.099	1.434	1.434	1.388	1.574	1.571	1.587	1.498	1.542	1.609		48.75	0.977	0.98	1.011	1.368	1.365	1.349	0.14	0.135	0.145	0.131	0.13	0.137	0.133	0.145	0.138		48.75	0.562	0.591	0.545	0.117	0.11	0.133	0.108	0.113	0.112	0.124	0.111	0.142	0.109	0.117	0.114
49	0.367	0.367	0.378	1.085	1.107	1.105	1.443	1.443	1.394	1.578	1.575	1.59	1.498	1.543	1.612		49	0.982	0.984	1.013	1.377	1.38	1.358	0.14	0.136	0.146	0.131	0.141	0.138	0.132	0.144	0.138		49	0.561	0.588	0.544	0.118	0.111	0.134	0.108	0.113	0.112	0.11	0.111	0.136	0.109	0.117	0.114
49.25	0.367	0.367	0.378	1.064	1.089	1.093	1.442	1.444	1.394	1.576	1.573	1.586	1.497	1.542	1.611		49.25	0.987	0.989	1.014	1.377	1.376	1.356	0.14	0.135	0.144	0.132	0.141	0.137	0.133	0.146	0.138		49.25	0.561	0.588	0.543	0.117	0.111	0.134	0.108	0.113	0.112	0.11	0.111	0.138	0.109	0.118	0.114
49.5	0.369	0.368	0.378	1.102	1.117	1.116	1.438	1.442	1.396	1.582	1.576	1.586	1.504	1.549	1.616		49.5	0.986	0.988	1.013	1.373	1.369	1.352	0.14	0.135	0.145	0.13	0.133	0.137	0.132	0.145	0.138		49.5	0.559	0.587	0.542	0.117	0.111	0.134	0.108	0.113	0.112	0.11	0.112	0.136	0.109	0.117	0.114
49.75	0.368	0.368	0.378	1.096	1.109	1.103	1.441	1.445	1.396	1.581	1.576	1.584	1.506	1.551	1.619		49.75	0.991	0.995	1.019	1.379	1.38	1.362	0.136	0.136	0.146	0.13	0.128	0.136	0.133	0.146	0.137		49.75	0.559	0.588	0.542	0.117	0.111	0.135	0.108	0.114	0.112	0.11	0.114	0.137	0.109	0.117	0.114
50	0.369	0.369	0.379	1.082	1.094	1.084	1.441	1.446	1.392	1.581	1.575	1.583	1.507	1.552	1.62		50	0.988	0.989	1.013	1.37	1.37	1.351	0.14	0.136	0.145	0.13	0.129	0.137	0.132	0.146	0.138		50	0.56	0.588	0.541	0.117	0.111	0.136	0.109	0.113	0.112	0.11	0.112	0.134	0.109	0.118	0.114
50.25	0.369	0.369	0.38	1.079	1.094	1.084	1.447	1.45	1.391	1.581	1.576	1.583	1.509	1.553	1.623		50.25	0.986	0.987	1.009	1.361	1.363	1.343	0.14	0.136	0.146	0.133	0.128	0.137	0.133	0.146	0.137		50.25	0.557	0.581	0.539	0.117	0.11	0.136	0.109	0.113	0.112	0.111	0.127	0.136	0.109	0.118	0.118
50.5	0.369	0.369	0.379	1.102	1.113	1.098	1.454	1.457	1.398	1.589	1.583	1.588	1.514	1.559	1.628		50.5	0.997	0.999	1.022	1.378	1.381	1.36	0.138	0.137	0.147	0.129	0.127	0.139	0.132	0.147	0.138		50.5	0.548	0.568	0.537	0.116	0.111	0.137	0.108	0.112	0.112	0.11	0.143	0.137	0.132	0.118	0.117
50.75	0.371	0.37	0.38	1.09	1.103	1.091	1.449	1.451	1.39	1.584	1.578	1.58	1.515	1.558	1.628		50.75	0.991	0.99	1.011	1.348	1.356	1.345	0.138	0.138	0.143	0.132	0.13	0.138	0.133	0.147	0.139		50.75	0.55	0.586	0.539	0.116	0.111	0.137	0.108	0.112	0.112	0.11	0.14	0.138	0.126	0.118	0.122
51	0.371	0.37	0.38	1.085	1.101	1.09	1.451	1.454	1.389	1.584	1.58	1.58	1.514	1.557	1.629		51	0.968	0.964	0.996	1.326	1.34	1.323	0.132	0.136	0.148	0.129	0.129	0.137	0.133	0.148	0.139		51	0.549	0.578	0.538	0.118	0.111	0.138	0.108	0.112	0.112	0.111	0.131	0.139	0.127	0.118	0.113
51.25	0.373	0.372	0.381	1.083	1.098	1.089	1.451	1.45	1.386	1.581	1.576	1.573	1.516	1.556	1.629		51.25	0.977	0.975	1.009	1.347	1.353	1.339	0.137	0.137	0.148	0.131	0.131	0.137	0.133	0.148	0.139		51.25	0.551	0.587	0.539	0.117	0.111	0.138	0.108	0.113	0.112	0.11	0.116	0.138	0.119	0.118	0.113
51.5	0.372	0.372	0.381	1.083	1.096	1.085	1.448	1.448	1.388	1.58	1.574	1.57	1.516	1.558	1.631		51.5	0.974	0.97	1.003	1.336	1.343	1.33	0.132	0.136	0.148	0.13	0.132	0.138	0.134	0.148	0.14		51.5	0.553	0.583	0.54	0.117	0.111	0.139	0.108	0.113	0.112	0.111	0.115	0.138	0.129	0.118	0.113
51.75	0.374	0.373	0.382	1.075	1.086	1.077	1.449	1.446	1.385	1.578	1.572	1.566	1.513	1.556	1.63		51.75	0.965	0.962	0.998	1.332	1.337	1.321	0.142	0.137	0.149	0.131	0.131	0.138	0.133	0.147	0.14		51.75	0.551	0.58	0.539	0.118	0.11	0.139	0.108	0.113	0.112	0.11	0.136	0.138	0.125	0.118	0.119
52	0.372	0.371	0.38	1.102	1.111	1.099	1.452	1.452	1.394	1.583	1.575	1.57	1.515	1.556	1.633		52	0.974	0.968	1.007	1.345	1.341	1.32	0.143	0.139	0.148	0.131	0.13	0.137	0.132	0.146	0.139		52	0.548	0.57	0.537	0.115	0.111	0.139	0.108	0.113	0.112	0.111	0.11	0.123	0.122	0.118	0.117
52.25	0.373	0.372	0.381	1.091	1.097	1.083	1.457	1.451	1.39	1.582	1.575	1.566	1.514	1.556	1.632		52.25	0.99	0.987	1.024	1.362	1.356	1.344	0.14	0.139	0.148	0.131	0.131	0.139	0.134	0.147	0.142		52.25	0.553	0.583	0.54	0.116	0.112	0.14	0.108	0.113	0.113	0.11	0.112	0.122	0.111	0.118	0.12
52.5	0.373	0.371	0.381	1.102	1.11	1.093	1.459	1.451	1.396	1.588	1.581	1.569	1.523	1.563	1.638		52.5	0.994	0.989	1.025	1.364	1.356	1.34	0.141	0.14	0.149	0.131	0.131	0.138	0.133	0.149	0.141		52.5	0.552	0.58	0.539	0.115	0.111	0.141	0.108	0.113	0.112	0.11	0.112	0.121	0.109	0.118	0.116
52.75	0.374	0.373	0.381	1.097	1.102	1.09	1.448	1.443	1.39	1.583	1.574	1.563	1.526	1.564	1.638		52.75	0.998	0.998	1.027	1.361	1.367	1.352	0.138	0.139	0.148	0.131	0.132	0.138	0.133	0.146	0.14		52.75	0.552	0.578	0.537	0.118	0.111	0.141	0.108	0.113	0.113	0.143	0.112	0.121	0.115	0.118	0.116
53	0.373	0.372	0.38	1.119	1.127	1.11	1.468	1.459	1.406	1.595	1.588	1.574	1.528	1.569	1.645		53	0.982	0.978	1.016	1.339	1.349	1.327	0.139	0.139	0.146	0.131	0.131	0.139	0.132	0.148	0.14		53	0.55	0.581	0.538	0.116	0.111	0.142	0.108	0.113	0.113	0.142	0.137	0.123	0.109	0.119	0.116
53.25	0.373	0.372	0.381	1.082	1.089	1.072	1.454	1.444	1.392	1.587	1.58	1.565	1.528	1.567	1.644		53.25	0.971	0.966	1.003	1.328	1.335	1.311	0.142	0.135	0.14	0.13	0.131	0.14	0.132	0.147	0.14		53.25	0.552	0.581	0.538	0.116	0.111	0.142	0.108	0.113	0.113	0.125	0.14	0.123	0.109	0.12	0.113
53.5	0.374	0.372	0.381	1.098	1.108	1.095	1.458	1.448	1.396	1.586	1.579	1.563	1.529	1.568	1.645		53.5	0.979	0.973	1.011	1.327	1.332	1.316	0.143	0.138	0.144	0.131	0.13	0.139	0.133	0.147	0.14		53.5	0.553	0.581	0.538	0.118	0.111	0.144	0.108	0.113	0.113	0.11	0.137	0.121	0.109	0.121	0.113
53.75	0.375	0.373	0.381	1.105	1.114	1.099	1.457	1.448	1.396	1.589	1.582	1.561	1.531	1.568	1.647		53.75	0.983	0.975	1.012	1.324	1.33	1.318	0.142	0.139	0.146	0.129	0.129	0.139	0.132	0.147	0.14		53.75	0.547	0.579	0.537	0.117	0.11	0.143	0.108	0.113	0.113	0.11	0.136	0.123	0.14	0.12	0.13
54	0.375	0.373	0.382	1.099	1.108	1.093	1.452	1.443	1.394	1.586	1.579	1.559	1.531	1.568	1.647		54	0.974	0.966	1.005	1.32	1.322	1.307	0.143	0.137	0.148	0.13	0.13	0.138	0.132	0.146	0.14		54	0.548	0.575	0.537	0.117	0.111	0.144	0.108	0.113	0.113	0.11	0.117	0.122	0.111	0.121	0.116
54.25	0.375	0.373	0.381	1.097	1.103	1.09	1.459	1.45	1.401	1.588	1.582	1.562	1.53	1.569	1.649		54.25	0.976	0.968	1.007	1.324	1.333	1.314	0.144	0.139	0.145	0.13	0.128	0.139	0.133	0.146	0.14		54.25	0.551	0.581	0.537	0.118	0.111	0.146	0.108	0.113	0.113	0.111	0.114	0.122	0.109	0.119	0.113
54.5	0.375	0.373	0.381	1.09	1.097	1.083	1.45	1.441	1.395	1.586	1.579	1.556	1.531	1.568	1.649		54.5	0.981	0.968	1.014	1.319	1.328	1.313	0.143	0.138	0.144	0.13	0.129	0.138	0.133	0.147	0.14		54.5	0.547	0.565	0.534	0.118	0.111	0.146	0.108	0.113	0.113	0.111	0.115	0.123	0.122	0.119	0.137
54.75	0.376	0.374	0.381	1.094	1.101	1.086	1.45	1.441	1.399	1.588	1.58	1.556	1.534	1.571	1.651		54.75	0.976	0.964	1.011	1.313	1.33	1.305	0.143	0.138	0.146	0.132	0.13	0.138	0.133	0.146	0.14		54.75	0.548	0.571	0.536	0.119	0.111	0.147	0.108	0.113	0.113	0.111	0.114	0.122	0.109	0.12	0.113
55	0.377	0.375	0.381	1.113	1.122	1.107	1.453	1.443	1.403	1.591	1.584	1.556	1.536	1.574	1.653		55	0.966	0.955	1.007	1.307	1.321	1.29	0.14	0.138	0.147	0.132	0.13	0.138	0.133	0.147	0.14		55	0.544	0.564	0.536	0.118	0.111	0.148	0.108	0.113	0.113	0.111	0.123	0.124	0.109	0.132	0.136
55.25	0.376	0.375	0.381	1.106	1.113	1.096	1.452	1.44	1.401	1.59	1.583	1.553	1.537	1.575	1.655		55.25	0.98	0.972	1.018	1.311	1.319	1.302	0.135	0.138	0.147	0.129	0.129	0.138	0.132	0.148	0.14		55.25	0.552	0.583	0.537	0.119	0.111	0.148	0.108	0.113	0.113	0.11	0.115	0.123	0.109	0.128	0.112
55.5	0.376	0.374	0.382	1.107	1.116	1.101	1.454	1.443	1.406	1.59	1.583	1.553	1.539	1.575	1.656		55.5	0.989	0.982	1.024	1.322	1.333	1.314	0.143	0.137	0.148	0.13	0.128	0.139	0.132	0.146	0.14		55.5	0.547	0.581	0.535	0.115	0.111	0.148	0.108	0.113	0.113	0.137	0.14	0.123	0.111	0.132	0.134
55.75	0.378	0.376	0.383	1.083	1.088	1.074	1.445	1.434	1.4	1.588	1.581	1.548	1.54	1.574	1.656		55.75	0.98	0.971	1.018	1.305	1.316	1.302	0.143	0.139	0.147	0.129	0.128	0.138	0.132	0.146	0.141		55.75	0.548	0.583	0.535	0.115	0.112	0.149	0.108	0.113	0.113	0.109	0.112	0.122	0.111	0.134	0.112
56	0.378	0.376	0.383	1.081	1.086	1.072	1.443	1.43	1.399	1.585	1.576	1.545	1.541	1.575	1.657		56	0.984	0.976	1.021	1.307	1.312	1.309	0.143	0.136	0.148	0.128	0.127	0.137	0.132	0.145	0.14		56	0.549	0.579	0.535	0.116	0.111	0.151	0.108	0.113	0.113	0.111	0.118	0.122	0.122	0.132	0.112
56.25	0.379	0.378	0.384	1.079	1.083	1.069	1.439	1.427	1.397	1.584	1.575	1.54	1.543	1.576	1.657		56.25	0.979	0.968	1.018	1.294	1.302	1.298	0.144	0.137	0.145	0.128	0.131	0.137	0.133	0.148	0.14		56.25	0.55	0.583	0.535	0.116	0.112	0.152	0.109	0.113	0.113	0.111	0.142	0.123	0.12	0.134	0.132
56.5	0.379	0.377	0.384	1.072	1.075	1.061	1.438	1.426	1.398	1.585	1.577	1.541	1.544	1.577	1.659		56.5	0.987	0.977	1.028	1.307	1.311	1.309	0.142	0.14	0.145	0.129	0.137	0.136	0.134	0.147	0.14		56.5	0.551	0.587	0.536	0.116	0.112	0.153	0.109	0.113	0.113	0.133	0.139	0.121	0.125	0.133	0.131
56.75	0.384	0.382	0.385	1.078	1.082	1.069	1.437	1.426	1.4	1.586	1.575	1.538	1.547	1.577	1.659		56.75	0.967	0.957	1.008	1.289	1.3	1.287	0.139	0.141	0.147	0.132	0.132	0.138	0.133	0.145	0.14		56.75	0.549	0.578	0.535	0.117	0.112	0.154	0.109	0.113	0.113	0.111	0.12	0.119	0.109	0.13	0.131
57	0.383	0.381	0.385	1.068	1.071	1.059	1.433	1.422	1.398	1.584	1.574	1.534	1.548	1.579	1.66		57	0.982	0.971	1.02	1.293	1.295	1.299	0.138	0.139	0.147	0.129	0.127	0.136	0.132	0.146	0.142		57	0.547	0.575	0.534	0.116	0.112	0.154	0.109	0.113	0.113	0.14	0.14	0.118	0.109	0.12	0.128
57.25	0.387	0.385	0.385	1.094	1.096	1.081	1.435	1.423	1.403	1.588	1.576	1.536	1.55	1.58	1.661		57.25	0.984	0.976	1.024	1.304	1.305	1.306	0.141	0.14	0.147	0.13	0.135	0.136	0.132	0.146	0.142		57.25	0.554	0.589	0.537	0.117	0.112	0.156	0.109	0.113	0.113	0.141	0.139	0.118	0.109	0.12	0.121
57.5	0.383	0.381	0.386	1.088	1.086	1.07	1.436	1.422	1.405	1.589	1.579	1.537	1.551	1.581	1.663		57.5	0.975	0.965	1.019	1.294	1.291	1.288	0.143	0.139	0.141	0.13	0.131	0.137	0.133	0.147	0.156		57.5	0.55	0.578	0.536	0.118	0.112	0.156	0.109	0.113	0.113	0.111	0.114	0.12	0.109	0.121	0.136
57.75	0.381	0.38	0.383	1.126	1.127	1.115	1.449	1.435	1.421	1.598	1.588	1.545	1.551	1.581	1.665		57.75	0.975	0.967	1.022	1.299	1.294	1.29	0.145	0.14	0.145	0.131	0.13	0.137	0.134	0.147	0.156		57.75	0.548	0.584	0.535	0.117	0.112	0.155	0.109	0.113	0.113	0.11	0.139	0.122	0.12	0.121	0.123
58	0.382	0.38	0.384	1.111	1.11	1.093	1.443	1.428	1.419	1.599	1.59	1.543	1.555	1.584	1.668		58	0.972	0.964	1.021	1.298	1.291	1.285	0.145	0.141	0.144	0.132	0.129	0.138	0.134	0.147	0.155		58	0.544	0.581	0.533	0.117	0.112	0.155	0.109	0.113	0.113	0.111	0.116	0.121	0.138	0.137	0.116
58.25	0.382	0.38	0.384	1.114	1.108	1.089	1.436	1.422	1.417	1.596	1.584	1.538	1.559	1.586	1.668		58.25	0.957	0.948	1.005	1.278	1.275	1.271	0.143	0.14	0.143	0.13	0.13	0.137	0.133	0.146	0.154		58.25	0.541	0.572	0.532	0.117	0.112	0.157	0.109	0.113	0.113	0.11	0.133	0.12	0.133	0.13	0.116
58.5	0.382	0.379	0.385	1.094	1.087	1.068	1.432	1.417	1.412	1.593	1.582	1.535	1.558	1.586	1.669		58.5	0.952	0.943	1.003	1.268	1.271	1.267	0.145	0.139	0.142	0.131	0.131	0.137	0.134	0.146	0.154		58.5	0.542	0.579	0.533	0.118	0.112	0.159	0.109	0.113	0.113	0.111	0.138	0.123	0.133	0.124	0.136
58.75	0.383	0.38	0.386	1.092	1.085	1.069	1.432	1.417	1.414	1.593	1.583	1.534	1.559	1.587	1.669		58.75	0.97	0.964	1.019	1.275	1.279	1.287	0.145	0.131	0.144	0.13	0.129	0.137	0.134	0.148	0.155		58.75	0.541	0.58	0.533	0.117	0.112	0.159	0.109	0.113	0.113	0.111	0.141	0.12	0.119	0.126	0.135
59	0.383	0.381	0.386	1.093	1.086	1.071	1.434	1.419	1.416	1.595	1.586	1.535	1.559	1.588	1.671		59	0.979	0.971	1.026	1.283	1.283	1.294	0.144	0.14	0.143	0.129	0.131	0.137	0.135	0.148	0.158		59	0.54	0.572	0.532	0.118	0.112	0.161	0.109	0.113	0.113	0.11	0.128	0.119	0.124	0.127	0.114
59.25	0.385	0.382	0.387	1.084	1.078	1.063	1.432	1.418	1.415	1.596	1.587	1.533	1.559	1.587	1.672		59.25	0.975	0.966	1.021	1.286	1.28	1.288	0.145	0.137	0.143	0.13	0.139	0.137	0.134	0.148	0.154		59.25	0.54	0.572	0.532	0.118	0.111	0.162	0.109	0.113	0.113	0.11	0.141	0.12	0.12	0.129	0.116
59.5	0.382	0.38	0.385	1.078	1.078	1.07	1.433	1.417	1.413	1.589	1.58	1.529	1.556	1.584	1.67		59.5	0.982	0.975	1.032	1.287	1.283	1.298	0.145	0.14	0.143	0.132	0.142	0.137	0.134	0.148	0.152		59.5	0.54	0.571	0.533	0.12	0.113	0.164	0.109	0.113	0.113	0.111	0.139	0.119	0.12	0.131	0.114
59.75	0.387	0.386	0.387	1.09	1.086	1.07	1.429	1.414	1.413	1.595	1.585	1.529	1.561	1.587	1.671		59.75	0.954	0.944	1.008	1.261	1.265	1.267	0.144	0.142	0.144	0.133	0.14	0.138	0.135	0.147	0.153		59.75	0.546	0.579	0.533	0.118	0.112	0.164	0.109	0.113	0.113	0.111	0.14	0.122	0.119	0.128	0.114
60	0.385	0.383	0.386	1.118	1.119	1.101	1.436	1.421	1.42	1.6	1.589	1.534	1.566	1.593	1.674		60	0.96	0.952	1.017	1.269	1.267	1.276	0.143	0.142	0.143	0.134	0.142	0.139	0.134	0.147	0.149		60	0.545	0.57	0.533	0.119	0.112	0.167	0.109	0.115	0.113	0.114	0.114	0.122	0.113	0.135	0.113
60.25	0.387	0.385	0.387	1.082	1.08	1.063	1.422	1.407	1.407	1.594	1.584	1.526	1.566	1.591	1.672		60.25	0.979	0.974	1.037	1.287	1.281	1.303	0.144	0.141	0.144	0.132	0.143	0.138	0.135	0.147	0.145		60.25	0.542	0.574	0.533	0.118	0.112	0.166	0.115	0.114	0.113	0.122	0.112	0.144	0.12	0.124	0.113
60.5	0.391	0.39	0.388	1.094	1.087	1.069	1.421	1.407	1.409	1.595	1.582	1.525	1.566	1.591	1.672		60.5	0.974	0.967	1.029	1.275	1.272	1.292	0.144	0.137	0.139	0.13	0.135	0.137	0.134	0.147	0.142		60.5	0.542	0.569	0.532	0.118	0.112	0.167	0.115	0.115	0.113	0.13	0.113	0.137	0.121	0.113	0.113
60.75	0.388	0.386	0.387	1.098	1.082	1.06	1.424	1.411	1.414	1.6	1.586	1.528	1.569	1.594	1.673		60.75	0.977	0.973	1.032	1.285	1.275	1.303	0.125	0.136	0.137	0.129	0.133	0.137	0.134	0.147	0.14		60.75	0.543	0.575	0.533	0.118	0.112	0.168	0.116	0.115	0.113	0.111	0.112	0.123	0.121	0.113	0.113
61	0.387	0.385	0.388	1.084	1.072	1.052	1.423	1.407	1.411	1.598	1.587	1.527	1.568	1.594	1.675		61	0.976	0.969	1.03	1.263	1.267	1.294	0.125	0.136	0.136	0.13	0.14	0.137	0.134	0.147	0.141		61	0.542	0.57	0.531	0.118	0.112	0.17	0.117	0.115	0.113	0.13	0.112	0.124	0.111	0.127	0.113
61.25	0.389	0.386	0.388	1.075	1.069	1.05	1.413	1.398	1.403	1.592	1.58	1.52	1.57	1.593	1.671		61.25	0.962	0.953	1.02	1.252	1.258	1.279	0.144	0.137	0.138	0.131	0.141	0.137	0.134	0.146	0.141		61.25	0.54	0.564	0.531	0.121	0.112	0.172	0.118	0.115	0.113	0.136	0.111	0.119	0.116	0.126	0.113
61.5	0.391	0.39	0.39	1.076	1.065	1.047	1.415	1.4	1.405	1.594	1.582	1.521	1.572	1.596	1.673		61.5	0.966	0.959	1.028	1.263	1.267	1.285	0.146	0.141	0.152	0.131	0.141	0.138	0.135	0.147	0.142		61.5	0.54	0.564	0.531	0.121	0.112	0.173	0.116	0.115	0.113	0.115	0.112	0.122	0.136	0.127	0.113
61.75	0.389	0.386	0.388	1.081	1.072	1.054	1.416	1.401	1.406	1.594	1.583	1.522	1.57	1.595	1.672		61.75	0.964	0.958	1.024	1.253	1.266	1.287	0.146	0.141	0.152	0.132	0.142	0.138	0.135	0.147	0.143		61.75	0.543	0.572	0.532	0.12	0.114	0.176	0.115	0.115	0.113	0.111	0.111	0.121	0.132	0.128	0.113
62	0.398	0.396	0.391	1.067	1.058	1.039	1.408	1.394	1.401	1.593	1.58	1.517	1.573	1.596	1.67		62	0.957	0.95	1.016	1.241	1.248	1.273	0.145	0.14	0.143	0.133	0.142	0.139	0.135	0.148	0.145		62	0.544	0.57	0.531	0.12	0.112	0.175	0.113	0.115	0.113	0.141	0.114	0.121	0.115	0.124	0.114
62.25	0.396	0.394	0.39	1.072	1.061	1.045	1.413	1.4	1.408	1.597	1.584	1.521	1.574	1.597	1.67		62.25	0.962	0.954	1.021	1.243	1.258	1.271	0.145	0.143	0.144	0.133	0.14	0.138	0.135	0.147	0.143		62.25	0.543	0.57	0.531	0.12	0.112	0.178	0.117	0.115	0.113	0.135	0.12	0.12	0.126	0.128	0.114
62.5	0.39	0.387	0.388	1.107	1.099	1.081	1.426	1.411	1.42	1.603	1.591	1.528	1.576	1.601	1.672		62.5	0.963	0.953	1.02	1.237	1.26	1.267	0.145	0.137	0.144	0.133	0.137	0.139	0.136	0.147	0.143		62.5	0.539	0.561	0.531	0.121	0.113	0.179	0.115	0.115	0.113	0.143	0.145	0.118	0.112	0.131	0.114
62.75	0.399	0.397	0.391	1.085	1.073	1.053	1.407	1.392	1.407	1.598	1.584	1.519	1.579	1.6	1.668		62.75	0.962	0.954	1.024	1.236	1.267	1.275	0.143	0.138	0.134	0.133	0.136	0.138	0.135	0.147	0.144		62.75	0.544	0.576	0.533	0.121	0.113	0.18	0.114	0.115	0.113	0.114	0.118	0.124	0.11	0.122	0.114
63	0.393	0.391	0.391	1.076	1.065	1.047	1.41	1.396	1.407	1.598	1.584	1.52	1.576	1.599	1.667		63	0.962	0.953	1.026	1.232	1.271	1.271	0.145	0.141	0.143	0.134	0.143	0.138	0.136	0.148	0.145		63	0.543	0.572	0.533	0.117	0.112	0.181	0.118	0.115	0.113	0.132	0.143	0.122	0.122	0.113	0.115
63.25	0.398	0.398	0.392	1.095	1.08	1.059	1.408	1.395	1.411	1.601	1.585	1.519	1.583	1.602	1.665		63.25	0.963	0.953	1.026	1.233	1.27	1.282	0.142	0.128	0.134	0.132	0.132	0.138	0.135	0.147	0.141		63.25	0.54	0.563	0.532	0.117	0.114	0.183	0.118	0.115	0.113	0.111	0.111	0.119	0.112	0.113	0.118
63.5	0.4	0.399	0.393	1.055	1.043	1.022	1.397	1.382	1.399	1.594	1.578	1.513	1.581	1.599	1.662		63.5	0.964	0.956	1.025	1.226	1.258	1.273	0.147	0.141	0.135	0.133	0.131	0.139	0.136	0.147	0.141		63.5	0.542	0.562	0.532	0.117	0.113	0.185	0.117	0.115	0.113	0.11	0.112	0.118	0.113	0.116	0.116
63.75	0.397	0.396	0.393	1.073	1.06	1.043	1.402	1.388	1.404	1.595	1.58	1.515	1.58	1.601	1.661		63.75	0.955	0.944	1.016	1.215	1.251	1.264	0.135	0.143	0.137	0.136	0.132	0.139	0.137	0.148	0.143		63.75	0.545	0.574	0.532	0.118	0.114	0.187	0.11	0.115	0.113	0.135	0.133	0.118	0.14	0.116	0.116
64	0.396	0.394	0.392	1.078	1.064	1.048	1.405	1.392	1.407	1.599	1.585	1.519	1.582	1.603	1.662		64	0.967	0.957	1.033	1.231	1.25	1.283	0.141	0.145	0.138	0.135	0.132	0.139	0.136	0.147	0.142		64	0.544	0.571	0.532	0.119	0.112	0.188	0.117	0.115	0.113	0.11	0.112	0.118	0.138	0.113	0.113
64.25	0.397	0.395	0.392	1.078	1.066	1.051	1.404	1.39	1.407	1.598	1.585	1.519	1.582	1.602	1.66		64.25	0.971	0.96	1.037	1.226	1.248	1.276	0.146	0.142	0.157	0.145	0.13	0.138	0.137	0.148	0.143		64.25	0.545	0.569	0.532	0.118	0.113	0.19	0.117	0.115	0.113	0.111	0.112	0.118	0.137	0.113	0.112
64.5	0.403	0.402	0.393	1.078	1.066	1.05	1.402	1.389	1.406	1.6	1.586	1.518	1.586	1.605	1.659		64.5	0.984	0.975	1.048	1.239	1.264	1.295	0.147	0.141	0.151	0.15	0.134	0.139	0.137	0.148	0.142		64.5	0.546	0.574	0.532	0.118	0.113	0.191	0.118	0.115	0.113	0.11	0.111	0.118	0.109	0.129	0.113
64.75	0.402	0.4	0.392	1.101	1.087	1.069	1.406	1.395	1.414	1.603	1.588	1.52	1.588	1.606	1.658		64.75	0.973	0.959	1.036	1.225	1.245	1.266	0.146	0.143	0.143	0.143	0.134	0.139	0.137	0.148	0.147		64.75	0.544	0.57	0.531	0.118	0.113	0.192	0.116	0.115	0.113	0.112	0.112	0.118	0.109	0.125	0.113
65	0.402	0.402	0.392	1.091	1.073	1.055	1.401	1.389	1.411	1.605	1.59	1.521	1.589	1.608	1.657		65	0.966	0.955	1.03	1.225	1.247	1.262	0.146	0.144	0.146	0.142	0.132	0.139	0.137	0.15	0.158		65	0.545	0.571	0.531	0.117	0.113	0.194	0.117	0.115	0.113	0.111	0.144	0.119	0.113	0.116	0.113
65.25	0.404	0.405	0.393	1.087	1.064	1.044	1.396	1.385	1.408	1.605	1.588	1.518	1.593	1.609	1.654		65.25	0.99	0.982	1.055	1.252	1.268	1.311	0.146	0.124	0.136	0.132	0.136	0.139	0.138	0.148	0.143		65.25	0.543	0.564	0.532	0.118	0.115	0.199	0.116	0.115	0.113	0.111	0.141	0.121	0.111	0.129	0.113
65.5	0.403	0.405	0.394	1.065	1.045	1.028	1.393	1.382	1.402	1.602	1.586	1.516	1.587	1.606	1.651		65.5	0.983	0.976	1.043	1.245	1.263	1.285	0.145	0.123	0.136	0.131	0.137	0.139	0.136	0.149	0.143		65.5	0.543	0.566	0.529	0.119	0.113	0.197	0.118	0.115	0.113	0.111	0.117	0.119	0.11	0.136	0.113
65.75	0.408	0.411	0.395	1.085	1.064	1.045	1.395	1.385	1.409	1.604	1.587	1.517	1.593	1.609	1.651		65.75	0.97	0.961	1.035	1.234	1.242	1.27	0.146	0.123	0.136	0.132	0.136	0.14	0.137	0.148	0.143		65.75	0.54	0.564	0.529	0.118	0.114	0.197	0.116	0.115	0.113	0.111	0.112	0.119	0.114	0.127	0.137
66	0.408	0.408	0.395	1.065	1.047	1.029	1.388	1.379	1.402	1.601	1.583	1.513	1.588	1.607	1.648		66	0.953	0.945	1.019	1.219	1.235	1.256	0.145	0.122	0.136	0.134	0.134	0.14	0.136	0.148	0.143		66	0.54	0.565	0.528	0.118	0.113	0.198	0.116	0.115	0.113	0.11	0.111	0.118	0.112	0.133	0.112
66.25	0.402	0.402	0.394	1.083	1.065	1.048	1.392	1.382	1.407	1.605	1.588	1.518	1.593	1.609	1.648		66.25	0.951	0.942	1.018	1.216	1.23	1.253	0.146	0.124	0.137	0.133	0.136	0.141	0.137	0.149	0.144		66.25	0.541	0.57	0.53	0.118	0.113	0.202	0.116	0.115	0.113	0.111	0.112	0.119	0.111	0.136	0.113
66.5	0.405	0.407	0.395	1.068	1.049	1.032	1.389	1.38	1.402	1.6	1.584	1.514	1.587	1.606	1.644		66.5	0.966	0.954	1.033	1.232	1.241	1.271	0.148	0.122	0.137	0.136	0.136	0.139	0.137	0.148	0.143		66.5	0.541	0.565	0.529	0.118	0.113	0.204	0.117	0.115	0.113	0.111	0.112	0.119	0.11	0.113	0.113
66.75	0.403	0.405	0.395	1.075	1.058	1.042	1.394	1.384	1.408	1.604	1.589	1.519	1.59	1.61	1.646		66.75	0.956	0.946	1.025	1.222	1.236	1.262	0.142	0.129	0.14	0.139	0.134	0.139	0.136	0.147	0.142		66.75	0.544	0.572	0.53	0.119	0.114	0.208	0.118	0.115	0.113	0.112	0.112	0.119	0.11	0.113	0.113
67	0.409	0.411	0.396	1.058	1.041	1.024	1.381	1.373	1.399	1.6	1.583	1.513	1.591	1.608	1.642		67	0.961	0.95	1.027	1.216	1.23	1.259	0.147	0.123	0.138	0.131	0.13	0.139	0.137	0.144	0.143		67	0.542	0.571	0.53	0.118	0.113	0.211	0.119	0.115	0.113	0.11	0.111	0.119	0.115	0.113	0.113
67.25	0.41	0.413	0.397	1.065	1.049	1.032	1.382	1.373	1.398	1.6	1.584	1.514	1.592	1.609	1.641		67.25	0.966	0.957	1.034	1.224	1.237	1.274	0.118	0.123	0.138	0.13	0.132	0.139	0.137	0.141	0.144		67.25	0.541	0.566	0.529	0.119	0.114	0.212	0.116	0.115	0.113	0.11	0.112	0.119	0.111	0.113	0.113
67.5	0.413	0.416	0.394	1.094	1.073	1.058	1.397	1.388	1.416	1.615	1.6	1.528	1.597	1.615	1.645		67.5	0.973	0.964	1.042	1.229	1.239	1.274	0.119	0.124	0.139	0.14	0.145	0.141	0.143	0.151	0.144		67.5	0.546	0.577	0.532	0.12	0.113	0.213	0.119	0.116	0.113	0.111	0.111	0.119	0.112	0.113	0.113
67.75	0.412	0.415	0.396	1.078	1.057	1.043	1.383	1.375	1.404	1.605	1.588	1.518	1.596	1.613	1.642		67.75	0.98	0.971	1.046	1.248	1.26	1.285	0.119	0.124	0.137	0.136	0.142	0.141	0.142	0.15	0.144		67.75	0.542	0.567	0.528	0.12	0.114	0.212	0.112	0.115	0.113	0.112	0.115	0.119	0.113	0.112	0.113
68	0.406	0.407	0.396	1.084	1.07	1.057	1.39	1.383	1.409	1.605	1.59	1.52	1.595	1.614	1.642		68	0.977	0.97	1.043	1.238	1.25	1.285	0.118	0.123	0.136	0.131	0.131	0.141	0.136	0.139	0.144		68	0.543	0.569	0.539	0.118	0.113	0.216	0.114	0.115	0.113	0.11	0.111	0.118	0.11	0.112	0.112
68.25	0.418	0.421	0.397	1.089	1.068	1.052	1.39	1.383	1.412	1.613	1.597	1.525	1.599	1.617	1.641		68.25	0.947	0.936	1.013	1.202	1.231	1.243	0.12	0.123	0.136	0.132	0.132	0.139	0.137	0.14	0.144		68.25	0.536	0.558	0.526	0.12	0.115	0.218	0.116	0.116	0.113	0.111	0.111	0.117	0.11	0.113	0.113
68.5	0.42	0.423	0.399	1.046	1.026	1.009	1.372	1.364	1.395	1.603	1.586	1.516	1.597	1.613	1.636		68.5	0.966	0.96	1.037	1.223	1.245	1.272	0.12	0.123	0.137	0.143	0.139	0.14	0.137	0.14	0.144		68.5	0.542	0.567	0.528	0.12	0.115	0.224	0.116	0.116	0.113	0.111	0.111	0.118	0.111	0.113	0.113
68.75	0.41	0.412	0.398	1.064	1.048	1.031	1.377	1.369	1.397	1.602	1.585	1.517	1.596	1.614	1.635		68.75	0.96	0.951	1.028	1.225	1.239	1.263	0.119	0.123	0.135	0.149	0.145	0.141	0.138	0.14	0.144		68.75	0.542	0.564	0.535	0.121	0.115	0.223	0.116	0.115	0.113	0.111	0.112	0.119	0.114	0.113	0.112
69	0.415	0.418	0.399	1.069	1.05	1.033	1.38	1.373	1.399	1.602	1.586	1.517	1.594	1.612	1.633		69	0.973	0.967	1.038	1.236	1.247	1.275	0.119	0.123	0.136	0.144	0.145	0.14	0.137	0.139	0.144		69	0.543	0.565	0.528	0.12	0.115	0.225	0.116	0.115	0.113	0.11	0.112	0.119	0.11	0.113	0.113
69.25	0.417	0.418	0.398	1.075	1.055	1.038	1.384	1.377	1.409	1.611	1.594	1.524	1.598	1.616	1.634		69.25	0.967	0.954	1.031	1.218	1.237	1.267	0.119	0.122	0.136	0.142	0.142	0.141	0.137	0.139	0.145		69.25	0.54	0.559	0.528	0.12	0.116	0.23	0.116	0.115	0.113	0.112	0.112	0.119	0.115	0.113	0.113
69.5	0.424	0.428	0.398	1.073	1.05	1.032	1.377	1.371	1.404	1.609	1.591	1.523	1.597	1.615	1.631		69.5	0.954	0.943	1.021	1.212	1.23	1.249	0.12	0.124	0.137	0.148	0.144	0.143	0.137	0.139	0.145		69.5	0.536	0.557	0.527	0.12	0.114	0.232	0.116	0.115	0.113	0.111	0.111	0.117	0.11	0.113	0.113
69.75	0.426	0.432	0.399	1.059	1.038	1.019	1.377	1.37	1.4	1.607	1.589	1.522	1.596	1.614	1.629		69.75	0.955	0.944	1.023	1.21	1.222	1.251	0.139	0.123	0.138	0.135	0.139	0.141	0.152	0.141	0.144		69.75	0.545	0.567	0.529	0.12	0.116	0.238	0.116	0.115	0.113	0.112	0.111	0.118	0.122	0.113	0.113
70	0.416	0.42	0.398	1.087	1.068	1.053	1.388	1.38	1.411	1.612	1.595	1.528	1.599	1.619	1.633		70	0.959	0.95	1.027	1.219	1.225	1.257	0.149	0.123	0.136	0.132	0.144	0.141	0.153	0.141	0.145		70	0.543	0.562	0.528	0.12	0.116	0.242	0.116	0.115	0.114	0.111	0.116	0.125	0.138	0.113	0.113
70.25	0.429	0.434	0.4	1.064	1.042	1.024	1.372	1.367	1.401	1.609	1.59	1.524	1.599	1.618	1.629		70.25	0.959	0.947	1.027	1.206	1.215	1.247	0.145	0.124	0.138	0.133	0.138	0.14	0.137	0.141	0.144		70.25	0.543	0.562	0.528	0.119	0.115	0.241	0.116	0.115	0.113	0.11	0.142	0.133	0.135	0.113	0.113
70.5	0.429	0.433	0.401	1.057	1.038	1.024	1.37	1.365	1.399	1.608	1.589	1.524	1.6	1.618	1.627		70.5	0.971	0.958	1.038	1.215	1.228	1.261	0.144	0.125	0.136	0.139	0.138	0.14	0.137	0.141	0.144		70.5	0.539	0.558	0.526	0.12	0.115	0.244	0.117	0.115	0.113	0.111	0.127	0.124	0.111	0.113	0.113
70.75	0.434	0.438	0.401	1.08	1.057	1.043	1.376	1.37	1.405	1.612	1.592	1.527	1.602	1.618	1.627		70.75	0.969	0.956	1.036	1.215	1.229	1.259	0.148	0.126	0.138	0.148	0.141	0.141	0.137	0.141	0.144		70.75	0.54	0.558	0.525	0.121	0.116	0.245	0.116	0.116	0.113	0.111	0.111	0.12	0.117	0.113	0.114
71	0.429	0.436	0.399	1.088	1.067	1.055	1.385	1.381	1.415	1.617	1.6	1.534	1.604	1.623	1.63		71	0.953	0.938	1.02	1.199	1.217	1.242	0.148	0.126	0.138	0.143	0.143	0.14	0.137	0.141	0.144		71	0.537	0.553	0.524	0.119	0.114	0.246	0.115	0.116	0.113	0.111	0.111	0.119	0.11	0.113	0.113
71.25	0.431	0.437	0.4	1.066	1.043	1.028	1.371	1.366	1.401	1.611	1.594	1.53	1.603	1.621	1.626		71.25	0.961	0.947	1.03	1.203	1.228	1.256	0.147	0.132	0.137	0.145	0.142	0.139	0.136	0.141	0.144		71.25	0.536	0.556	0.526	0.119	0.116	0.251	0.111	0.116	0.113	0.111	0.111	0.119	0.14	0.113	0.113
71.5	0.433	0.438	0.402	1.052	1.028	1.013	1.369	1.364	1.397	1.61	1.593	1.529	1.602	1.62	1.623		71.5	0.959	0.946	1.025	1.198	1.215	1.249	0.148	0.136	0.137	0.136	0.132	0.139	0.137	0.141	0.144		71.5	0.541	0.561	0.527	0.12	0.116	0.256	0.109	0.116	0.114	0.111	0.111	0.128	0.113	0.113	0.113

## Sheet: Fig2_ferulate
P. putida KT2440																	S. lignivorans SYK-6																	S. lignivorans B1D3A
Time (h)	5 mM ferulate			25 mM ferulate			50 mM ferulate			75 mM ferulate			100 mM ferulate				Time (h)	5 mM ferulate			25 mM ferulate			50 mM ferulate			75 mM ferulate			100 mM ferulate				Time (h)	5 mM ferulate			25 mM ferulate			50 mM ferulate			75 mM ferulate			100 mM ferulate
0.000277778	0.037	0.027	0.028	0.037	0.037	0.035	0.035	0.039	0.051	0.033	0.037	0.036	0.036	0.036	0.037		0.000277778	0.048	0.053	0.049	0.058	0.054	0.063	0.059	0.063	0.06	0.056	0.066	0.072	0.052	0.051	0.057		0.000277778	0.11	0.11	0.108	0.11	0.11	0.11	0.112	0.114	0.113	0.113	0.113	0.113	0.112	0.111	0.115
0.250278	0.036	0.029	0.029	0.037	0.042	0.038	0.033	0.046	0.052	0.03	0.035	0.033	0.037	0.037	0.04		0.250278	0.048	0.053	0.049	0.058	0.055	0.063	0.058	0.062	0.06	0.053	0.065	0.072	0.051	0.051	0.059		0.250278	0.11	0.111	0.11	0.11	0.109	0.11	0.111	0.112	0.112	0.113	0.113	0.112	0.112	0.111	0.115
0.500278	0.036	0.03	0.028	0.034	0.038	0.035	0.031	0.042	0.051	0.031	0.035	0.034	0.036	0.037	0.04		0.500278	0.047	0.053	0.049	0.056	0.053	0.062	0.058	0.062	0.06	0.054	0.068	0.075	0.05	0.05	0.059		0.500278	0.11	0.109	0.108	0.11	0.11	0.109	0.112	0.113	0.113	0.114	0.113	0.113	0.113	0.111	0.115
0.750278	0.036	0.031	0.029	0.034	0.039	0.036	0.031	0.043	0.051	0.032	0.036	0.034	0.036	0.038	0.041		0.750278	0.047	0.054	0.05	0.057	0.054	0.062	0.058	0.063	0.061	0.054	0.07	0.077	0.05	0.05	0.061		0.750278	0.111	0.109	0.109	0.111	0.11	0.112	0.112	0.113	0.112	0.114	0.113	0.113	0.113	0.112	0.115
1.00028	0.037	0.031	0.03	0.036	0.04	0.038	0.031	0.042	0.052	0.031	0.035	0.034	0.037	0.039	0.042		1.00028	0.048	0.055	0.05	0.057	0.054	0.063	0.058	0.063	0.062	0.055	0.071	0.078	0.051	0.051	0.062		1.00028	0.111	0.11	0.11	0.11	0.11	0.11	0.112	0.113	0.113	0.114	0.113	0.113	0.113	0.112	0.115
1.25028	0.038	0.034	0.032	0.039	0.042	0.04	0.032	0.044	0.053	0.031	0.037	0.035	0.036	0.039	0.043		1.25028	0.051	0.057	0.053	0.056	0.053	0.062	0.059	0.063	0.062	0.055	0.072	0.079	0.05	0.051	0.063		1.25028	0.112	0.113	0.112	0.111	0.11	0.111	0.112	0.114	0.112	0.114	0.113	0.113	0.113	0.112	0.115
1.50028	0.04	0.036	0.034	0.039	0.041	0.042	0.033	0.045	0.054	0.032	0.036	0.035	0.036	0.039	0.043		1.50028	0.052	0.059	0.054	0.057	0.054	0.064	0.059	0.064	0.063	0.056	0.073	0.081	0.05	0.051	0.064		1.50028	0.113	0.113	0.113	0.111	0.11	0.111	0.112	0.112	0.112	0.114	0.113	0.113	0.113	0.112	0.115
1.75028	0.04	0.036	0.034	0.04	0.041	0.043	0.033	0.048	0.056	0.032	0.037	0.036	0.036	0.04	0.044		1.75028	0.052	0.059	0.054	0.058	0.055	0.064	0.059	0.064	0.063	0.056	0.074	0.082	0.051	0.051	0.065		1.75028	0.115	0.115	0.115	0.109	0.108	0.109	0.113	0.113	0.113	0.114	0.113	0.113	0.113	0.114	0.115
2.00028	0.041	0.037	0.035	0.04	0.041	0.044	0.036	0.043	0.058	0.035	0.038	0.036	0.037	0.041	0.044		2.00028	0.053	0.061	0.056	0.056	0.054	0.063	0.059	0.064	0.064	0.056	0.075	0.083	0.051	0.052	0.066		2.00028	0.116	0.116	0.116	0.112	0.11	0.11	0.112	0.113	0.113	0.114	0.113	0.113	0.113	0.114	0.115
2.25028	0.043	0.037	0.036	0.044	0.043	0.044	0.037	0.047	0.06	0.038	0.041	0.039	0.038	0.042	0.045		2.25028	0.055	0.065	0.059	0.058	0.054	0.065	0.059	0.064	0.064	0.057	0.076	0.084	0.051	0.051	0.066		2.25028	0.118	0.119	0.117	0.111	0.11	0.111	0.112	0.114	0.113	0.114	0.113	0.113	0.113	0.115	0.115
2.50028	0.046	0.04	0.038	0.044	0.045	0.046	0.039	0.051	0.062	0.039	0.043	0.041	0.041	0.046	0.049		2.50028	0.058	0.067	0.062	0.056	0.053	0.064	0.059	0.064	0.064	0.057	0.076	0.084	0.051	0.052	0.067		2.50028	0.119	0.12	0.117	0.111	0.109	0.109	0.113	0.113	0.113	0.114	0.113	0.113	0.114	0.115	0.115
2.75028	0.047	0.04	0.039	0.047	0.05	0.049	0.039	0.051	0.063	0.042	0.043	0.042	0.04	0.045	0.048		2.75028	0.059	0.069	0.062	0.057	0.054	0.064	0.057	0.064	0.064	0.058	0.077	0.085	0.051	0.052	0.067		2.75028	0.121	0.121	0.12	0.111	0.11	0.112	0.113	0.113	0.113	0.114	0.113	0.113	0.113	0.115	0.115
3.00028	0.048	0.042	0.041	0.048	0.05	0.053	0.042	0.057	0.064	0.043	0.044	0.042	0.04	0.046	0.05		3.00028	0.063	0.073	0.067	0.057	0.054	0.064	0.059	0.065	0.065	0.059	0.077	0.086	0.052	0.053	0.068		3.00028	0.123	0.121	0.122	0.11	0.108	0.11	0.112	0.113	0.112	0.114	0.113	0.114	0.114	0.116	0.116
3.25028	0.05	0.044	0.043	0.049	0.054	0.055	0.043	0.054	0.066	0.043	0.045	0.044	0.041	0.048	0.053		3.25028	0.067	0.078	0.071	0.057	0.054	0.064	0.059	0.065	0.065	0.059	0.078	0.086	0.052	0.053	0.069		3.25028	0.126	0.123	0.123	0.111	0.111	0.112	0.112	0.114	0.113	0.114	0.113	0.114	0.113	0.116	0.116
3.50028	0.051	0.043	0.044	0.051	0.051	0.057	0.043	0.055	0.066	0.044	0.046	0.044	0.04	0.047	0.05		3.50028	0.07	0.082	0.075	0.057	0.054	0.064	0.058	0.064	0.065	0.059	0.078	0.086	0.051	0.052	0.068		3.50028	0.129	0.125	0.126	0.111	0.109	0.112	0.113	0.113	0.112	0.114	0.113	0.114	0.114	0.116	0.116
3.75028	0.052	0.044	0.045	0.053	0.053	0.057	0.044	0.056	0.068	0.048	0.047	0.045	0.041	0.047	0.051		3.75028	0.075	0.088	0.08	0.057	0.054	0.064	0.058	0.065	0.065	0.059	0.079	0.087	0.052	0.053	0.068		3.75028	0.132	0.128	0.129	0.111	0.11	0.11	0.113	0.113	0.113	0.114	0.113	0.113	0.113	0.116	0.115
4.00028	0.054	0.046	0.047	0.055	0.055	0.061	0.045	0.063	0.07	0.047	0.047	0.046	0.04	0.048	0.052		4.00028	0.08	0.093	0.085	0.057	0.055	0.064	0.058	0.065	0.065	0.06	0.079	0.087	0.052	0.053	0.069		4.00028	0.135	0.131	0.132	0.112	0.11	0.112	0.113	0.113	0.112	0.114	0.113	0.114	0.113	0.116	0.115
4.25028	0.054	0.046	0.047	0.056	0.056	0.063	0.047	0.067	0.072	0.049	0.049	0.047	0.041	0.048	0.052		4.25028	0.085	0.099	0.09	0.057	0.054	0.064	0.059	0.066	0.067	0.061	0.079	0.087	0.053	0.053	0.069		4.25028	0.138	0.133	0.134	0.112	0.111	0.112	0.114	0.113	0.113	0.114	0.114	0.114	0.114	0.117	0.116
4.50028	0.056	0.047	0.048	0.056	0.056	0.063	0.047	0.068	0.072	0.049	0.049	0.048	0.043	0.049	0.054		4.50028	0.09	0.107	0.095	0.056	0.054	0.064	0.059	0.065	0.066	0.061	0.08	0.087	0.053	0.053	0.069		4.50028	0.14	0.135	0.138	0.111	0.11	0.111	0.113	0.113	0.113	0.115	0.114	0.114	0.114	0.118	0.116
4.75028	0.056	0.048	0.049	0.056	0.057	0.065	0.047	0.069	0.073	0.049	0.052	0.05	0.042	0.05	0.054		4.75028	0.094	0.113	0.101	0.056	0.053	0.065	0.059	0.066	0.066	0.061	0.08	0.088	0.052	0.054	0.068		4.75028	0.143	0.138	0.14	0.111	0.111	0.111	0.113	0.113	0.113	0.115	0.114	0.115	0.114	0.119	0.116
5.00028	0.056	0.051	0.052	0.057	0.058	0.068	0.048	0.072	0.074	0.05	0.052	0.051	0.042	0.051	0.054		5.00028	0.099	0.121	0.106	0.056	0.053	0.063	0.058	0.067	0.067	0.061	0.08	0.088	0.052	0.054	0.068		5.00028	0.147	0.142	0.143	0.111	0.111	0.111	0.114	0.113	0.113	0.114	0.114	0.115	0.114	0.119	0.116
5.25028	0.059	0.054	0.056	0.06	0.061	0.072	0.049	0.075	0.075	0.051	0.053	0.051	0.044	0.052	0.056		5.25028	0.106	0.128	0.113	0.056	0.053	0.063	0.059	0.067	0.067	0.061	0.08	0.088	0.052	0.054	0.069		5.25028	0.15	0.146	0.147	0.112	0.111	0.112	0.114	0.114	0.113	0.115	0.114	0.115	0.114	0.12	0.116
5.50028	0.062	0.057	0.059	0.065	0.066	0.079	0.052	0.08	0.077	0.051	0.054	0.052	0.045	0.053	0.057		5.50028	0.111	0.135	0.119	0.057	0.054	0.065	0.059	0.067	0.067	0.062	0.081	0.089	0.053	0.055	0.069		5.50028	0.154	0.149	0.15	0.111	0.111	0.111	0.113	0.113	0.113	0.115	0.114	0.115	0.114	0.12	0.116
5.75028	0.067	0.062	0.064	0.069	0.071	0.085	0.056	0.087	0.081	0.053	0.056	0.053	0.046	0.053	0.056		5.75028	0.12	0.146	0.128	0.057	0.054	0.065	0.059	0.068	0.068	0.062	0.081	0.089	0.053	0.055	0.069		5.75028	0.158	0.152	0.154	0.111	0.11	0.111	0.113	0.113	0.112	0.115	0.114	0.115	0.114	0.12	0.116
6.00028	0.071	0.067	0.069	0.073	0.075	0.092	0.06	0.095	0.084	0.054	0.057	0.056	0.045	0.053	0.054		6.00028	0.129	0.155	0.137	0.056	0.053	0.064	0.059	0.068	0.067	0.062	0.081	0.089	0.052	0.054	0.068		6.00028	0.163	0.157	0.159	0.113	0.111	0.112	0.113	0.114	0.114	0.115	0.114	0.115	0.114	0.12	0.116
6.25028	0.076	0.073	0.075	0.08	0.082	0.102	0.066	0.106	0.09	0.057	0.061	0.059	0.046	0.053	0.055		6.25028	0.137	0.165	0.146	0.056	0.053	0.063	0.059	0.068	0.068	0.063	0.081	0.089	0.052	0.054	0.068		6.25028	0.167	0.162	0.163	0.114	0.113	0.113	0.113	0.113	0.113	0.115	0.114	0.115	0.114	0.121	0.116
6.50028	0.082	0.08	0.082	0.089	0.091	0.115	0.073	0.12	0.097	0.06	0.064	0.063	0.047	0.055	0.055		6.50028	0.144	0.174	0.156	0.056	0.053	0.064	0.059	0.067	0.068	0.062	0.08	0.088	0.052	0.054	0.068		6.50028	0.173	0.167	0.169	0.114	0.113	0.113	0.114	0.114	0.113	0.115	0.114	0.116	0.114	0.122	0.116
6.75028	0.089	0.089	0.09	0.101	0.103	0.132	0.083	0.137	0.106	0.066	0.069	0.068	0.049	0.056	0.057		6.75028	0.155	0.183	0.165	0.057	0.054	0.065	0.059	0.068	0.068	0.062	0.08	0.088	0.052	0.055	0.068		6.75028	0.178	0.172	0.176	0.114	0.112	0.113	0.115	0.114	0.114	0.115	0.115	0.116	0.115	0.123	0.117
7.00028	0.099	0.1	0.102	0.114	0.117	0.149	0.095	0.157	0.118	0.073	0.076	0.075	0.051	0.059	0.058		7.00028	0.165	0.191	0.173	0.056	0.053	0.064	0.06	0.069	0.069	0.062	0.08	0.089	0.053	0.055	0.068		7.00028	0.184	0.178	0.18	0.114	0.112	0.113	0.115	0.114	0.114	0.116	0.115	0.116	0.115	0.124	0.117
7.25028	0.112	0.114	0.115	0.131	0.135	0.171	0.11	0.179	0.133	0.082	0.084	0.085	0.055	0.062	0.061		7.25028	0.178	0.205	0.185	0.056	0.053	0.064	0.06	0.069	0.068	0.063	0.08	0.088	0.053	0.056	0.068		7.25028	0.19	0.183	0.187	0.113	0.112	0.113	0.115	0.114	0.114	0.115	0.115	0.116	0.115	0.124	0.116
7.50028	0.123	0.128	0.129	0.15	0.155	0.195	0.128	0.203	0.151	0.093	0.095	0.096	0.059	0.067	0.066		7.50028	0.185	0.215	0.194	0.056	0.053	0.065	0.06	0.068	0.068	0.063	0.08	0.088	0.053	0.056	0.068		7.50028	0.196	0.189	0.192	0.113	0.112	0.112	0.115	0.114	0.113	0.116	0.115	0.116	0.115	0.124	0.117
7.75028	0.137	0.145	0.146	0.174	0.179	0.221	0.15	0.229	0.172	0.106	0.107	0.11	0.064	0.071	0.07		7.75028	0.195	0.228	0.204	0.056	0.053	0.064	0.06	0.069	0.068	0.062	0.08	0.088	0.052	0.055	0.067		7.75028	0.203	0.195	0.198	0.113	0.112	0.112	0.115	0.114	0.114	0.115	0.114	0.116	0.115	0.125	0.116
8.00028	0.156	0.171	0.173	0.197	0.203	0.248	0.171	0.253	0.193	0.12	0.121	0.125	0.07	0.077	0.076		8.00028	0.207	0.241	0.215	0.056	0.052	0.063	0.059	0.068	0.068	0.063	0.08	0.089	0.052	0.055	0.067		8.00028	0.209	0.201	0.203	0.113	0.112	0.112	0.114	0.114	0.113	0.116	0.115	0.116	0.115	0.126	0.116
8.25028	0.203	0.231	0.239	0.229	0.236	0.285	0.197	0.281	0.22	0.137	0.138	0.143	0.078	0.085	0.084		8.25028	0.216	0.252	0.224	0.057	0.054	0.065	0.059	0.068	0.068	0.063	0.08	0.089	0.052	0.056	0.067		8.25028	0.217	0.209	0.212	0.114	0.113	0.113	0.115	0.114	0.113	0.116	0.115	0.116	0.115	0.126	0.117
8.50028	0.281	0.292	0.297	0.263	0.273	0.326	0.226	0.309	0.249	0.157	0.158	0.163	0.087	0.094	0.091		8.50028	0.228	0.266	0.236	0.056	0.053	0.063	0.059	0.068	0.068	0.063	0.08	0.089	0.053	0.056	0.067		8.50028	0.224	0.215	0.219	0.114	0.113	0.113	0.115	0.115	0.113	0.116	0.115	0.117	0.115	0.127	0.117
8.75028	0.31	0.32	0.324	0.305	0.318	0.373	0.257	0.339	0.28	0.179	0.179	0.185	0.097	0.105	0.1		8.75028	0.237	0.276	0.247	0.056	0.053	0.064	0.059	0.068	0.068	0.063	0.08	0.089	0.051	0.054	0.066		8.75028	0.231	0.223	0.23	0.113	0.112	0.113	0.114	0.114	0.113	0.116	0.115	0.117	0.115	0.128	0.117
9.00028	0.277	0.284	0.284	0.354	0.368	0.422	0.288	0.368	0.312	0.205	0.204	0.211	0.11	0.118	0.113		9.00028	0.247	0.286	0.256	0.056	0.053	0.063	0.059	0.069	0.068	0.063	0.081	0.089	0.051	0.054	0.066		9.00028	0.24	0.231	0.235	0.114	0.113	0.114	0.114	0.114	0.114	0.115	0.115	0.117	0.115	0.128	0.116
9.25028	0.262	0.27	0.27	0.401	0.414	0.468	0.318	0.398	0.344	0.232	0.231	0.239	0.124	0.132	0.127		9.25028	0.255	0.295	0.265	0.056	0.052	0.063	0.059	0.069	0.068	0.064	0.08	0.089	0.051	0.054	0.066		9.25028	0.247	0.239	0.244	0.114	0.112	0.113	0.115	0.115	0.114	0.116	0.115	0.117	0.115	0.129	0.117
9.50028	0.258	0.268	0.268	0.447	0.461	0.512	0.353	0.434	0.38	0.261	0.259	0.268	0.14	0.148	0.142		9.50028	0.266	0.308	0.275	0.056	0.053	0.063	0.06	0.069	0.068	0.064	0.08	0.089	0.052	0.055	0.066		9.50028	0.255	0.247	0.254	0.115	0.113	0.113	0.115	0.114	0.114	0.116	0.115	0.117	0.116	0.13	0.117
9.75028	0.256	0.267	0.267	0.49	0.501	0.551	0.388	0.468	0.415	0.291	0.291	0.297	0.158	0.167	0.161		9.75028	0.278	0.326	0.287	0.056	0.053	0.063	0.059	0.069	0.068	0.064	0.08	0.089	0.052	0.055	0.067		9.75028	0.263	0.257	0.267	0.115	0.113	0.114	0.115	0.115	0.114	0.116	0.115	0.117	0.115	0.131	0.117
10.0003	0.256	0.265	0.266	0.527	0.536	0.587	0.419	0.498	0.446	0.318	0.317	0.323	0.176	0.185	0.178		10.0003	0.288	0.335	0.297	0.056	0.053	0.063	0.059	0.069	0.069	0.064	0.081	0.089	0.052	0.055	0.066		10.0003	0.273	0.268	0.276	0.114	0.113	0.113	0.115	0.115	0.114	0.116	0.115	0.117	0.115	0.13	0.116
10.2503	0.254	0.262	0.262	0.561	0.57	0.62	0.452	0.529	0.477	0.346	0.344	0.351	0.197	0.206	0.198		10.2503	0.299	0.348	0.309	0.056	0.053	0.063	0.06	0.069	0.068	0.063	0.08	0.088	0.052	0.055	0.067		10.2503	0.285	0.282	0.289	0.115	0.114	0.114	0.114	0.115	0.114	0.116	0.115	0.117	0.115	0.131	0.116
10.5003	0.253	0.261	0.261	0.598	0.606	0.655	0.485	0.56	0.51	0.379	0.376	0.382	0.221	0.23	0.221		10.5003	0.31	0.36	0.319	0.056	0.053	0.063	0.06	0.068	0.068	0.063	0.08	0.088	0.052	0.055	0.067		10.5003	0.297	0.295	0.301	0.114	0.113	0.113	0.114	0.115	0.114	0.116	0.115	0.118	0.115	0.132	0.116
10.7503	0.253	0.26	0.261	0.633	0.639	0.686	0.515	0.586	0.54	0.41	0.407	0.414	0.246	0.255	0.246		10.7503	0.319	0.374	0.329	0.056	0.053	0.063	0.06	0.068	0.068	0.063	0.08	0.088	0.052	0.055	0.066		10.7503	0.312	0.308	0.314	0.113	0.113	0.113	0.114	0.114	0.113	0.116	0.116	0.118	0.115	0.133	0.117
11.0003	0.252	0.258	0.259	0.669	0.674	0.718	0.545	0.612	0.569	0.443	0.439	0.446	0.272	0.281	0.271		11.0003	0.329	0.382	0.339	0.056	0.052	0.062	0.059	0.067	0.067	0.063	0.08	0.088	0.052	0.054	0.067		11.0003	0.326	0.32	0.325	0.114	0.113	0.114	0.114	0.115	0.114	0.116	0.116	0.118	0.116	0.134	0.117
11.2503	0.252	0.258	0.26	0.701	0.706	0.748	0.575	0.639	0.597	0.474	0.47	0.476	0.297	0.309	0.298		11.2503	0.34	0.401	0.352	0.056	0.052	0.062	0.06	0.068	0.068	0.063	0.08	0.088	0.052	0.054	0.067		11.2503	0.34	0.332	0.335	0.114	0.113	0.114	0.115	0.114	0.114	0.116	0.116	0.118	0.116	0.134	0.117
11.5003	0.25	0.257	0.258	0.735	0.738	0.776	0.602	0.664	0.623	0.502	0.5	0.506	0.326	0.337	0.327		11.5003	0.351	0.412	0.364	0.056	0.053	0.062	0.06	0.068	0.068	0.063	0.08	0.088	0.052	0.054	0.067		11.5003	0.352	0.343	0.346	0.115	0.114	0.114	0.115	0.115	0.114	0.117	0.116	0.118	0.116	0.134	0.117
11.7503	0.249	0.256	0.257	0.765	0.77	0.807	0.626	0.689	0.649	0.532	0.529	0.534	0.355	0.365	0.353		11.7503	0.364	0.422	0.376	0.056	0.053	0.062	0.06	0.069	0.068	0.063	0.08	0.088	0.052	0.054	0.067		11.7503	0.363	0.354	0.357	0.115	0.113	0.114	0.115	0.115	0.115	0.116	0.116	0.119	0.115	0.124	0.117
12.0003	0.249	0.255	0.256	0.796	0.801	0.836	0.651	0.715	0.673	0.559	0.555	0.559	0.384	0.392	0.381		12.0003	0.372	0.431	0.388	0.056	0.053	0.062	0.06	0.07	0.069	0.063	0.08	0.088	0.053	0.055	0.067		12.0003	0.38	0.369	0.37	0.116	0.114	0.114	0.115	0.115	0.115	0.117	0.117	0.119	0.116	0.124	0.118
12.2503	0.248	0.254	0.255	0.824	0.829	0.862	0.673	0.736	0.695	0.584	0.581	0.585	0.413	0.422	0.411		12.2503	0.387	0.444	0.404	0.057	0.053	0.063	0.061	0.07	0.069	0.063	0.08	0.088	0.053	0.055	0.067		12.2503	0.394	0.378	0.38	0.116	0.114	0.114	0.115	0.115	0.115	0.117	0.117	0.119	0.116	0.124	0.118
12.5003	0.247	0.254	0.256	0.852	0.858	0.889	0.697	0.758	0.718	0.61	0.607	0.609	0.44	0.451	0.44		12.5003	0.398	0.448	0.415	0.056	0.052	0.062	0.061	0.069	0.068	0.063	0.08	0.089	0.053	0.055	0.067		12.5003	0.407	0.389	0.39	0.115	0.114	0.114	0.115	0.115	0.114	0.117	0.117	0.119	0.116	0.125	0.118
12.7503	0.247	0.253	0.255	0.884	0.889	0.918	0.718	0.779	0.738	0.633	0.631	0.632	0.469	0.476	0.467		12.7503	0.414	0.46	0.432	0.057	0.053	0.063	0.06	0.068	0.067	0.063	0.08	0.089	0.052	0.054	0.066		12.7503	0.418	0.399	0.4	0.115	0.113	0.114	0.114	0.115	0.113	0.117	0.117	0.119	0.116	0.123	0.117
13.0003	0.246	0.253	0.254	0.914	0.918	0.946	0.74	0.801	0.76	0.656	0.653	0.652	0.493	0.5	0.491		13.0003	0.427	0.475	0.449	0.057	0.053	0.063	0.06	0.068	0.068	0.064	0.08	0.089	0.053	0.055	0.066		13.0003	0.427	0.41	0.41	0.114	0.113	0.114	0.115	0.115	0.114	0.117	0.117	0.119	0.116	0.125	0.117
13.2503	0.245	0.252	0.254	0.942	0.942	0.966	0.761	0.82	0.779	0.678	0.673	0.672	0.551	0.523	0.511		13.2503	0.443	0.493	0.459	0.056	0.052	0.062	0.06	0.068	0.067	0.064	0.08	0.089	0.053	0.054	0.066		13.2503	0.437	0.42	0.422	0.115	0.113	0.114	0.116	0.115	0.114	0.116	0.116	0.119	0.116	0.124	0.117
13.5003	0.246	0.252	0.254	0.964	0.961	0.983	0.782	0.842	0.8	0.703	0.697	0.693	0.6	0.563	0.524		13.5003	0.462	0.515	0.476	0.057	0.053	0.063	0.06	0.068	0.068	0.064	0.08	0.089	0.053	0.054	0.066		13.5003	0.448	0.432	0.432	0.115	0.114	0.114	0.116	0.115	0.114	0.117	0.116	0.119	0.116	0.124	0.117
13.7503	0.245	0.252	0.254	0.978	0.975	0.992	0.805	0.865	0.819	0.722	0.717	0.707	0.66	0.624	0.546		13.7503	0.471	0.518	0.486	0.057	0.054	0.063	0.06	0.068	0.068	0.064	0.08	0.089	0.053	0.054	0.067		13.7503	0.464	0.444	0.444	0.115	0.115	0.114	0.116	0.115	0.114	0.117	0.116	0.12	0.116	0.126	0.117
14.0003	0.245	0.252	0.254	0.992	0.993	1.01	0.824	0.885	0.839	0.745	0.735	0.724	0.717	0.679	0.599		14.0003	0.485	0.536	0.503	0.056	0.053	0.063	0.06	0.068	0.067	0.063	0.08	0.089	0.053	0.055	0.067		14.0003	0.472	0.453	0.452	0.115	0.115	0.115	0.116	0.115	0.114	0.117	0.117	0.12	0.116	0.126	0.118
14.2503	0.245	0.252	0.253	1.018	1.023	1.041	0.846	0.904	0.857	0.765	0.756	0.737	0.797	0.746	0.683		14.2503	0.503	0.546	0.515	0.057	0.053	0.063	0.06	0.067	0.068	0.063	0.08	0.089	0.053	0.055	0.067		14.2503	0.481	0.463	0.462	0.115	0.115	0.115	0.116	0.115	0.114	0.117	0.116	0.119	0.116	0.126	0.117
14.5003	0.245	0.252	0.254	1.038	1.047	1.062	0.87	0.926	0.874	0.79	0.785	0.752	0.846	0.791	0.747		14.5003	0.509	0.553	0.523	0.057	0.053	0.064	0.06	0.068	0.068	0.06	0.081	0.089	0.054	0.055	0.067		14.5003	0.489	0.47	0.471	0.115	0.115	0.115	0.117	0.115	0.114	0.117	0.117	0.12	0.116	0.125	0.117
14.7503	0.244	0.251	0.253	1.054	1.067	1.085	0.888	0.946	0.887	0.81	0.813	0.773	0.896	0.838	0.803		14.7503	0.526	0.564	0.541	0.057	0.053	0.064	0.061	0.069	0.068	0.06	0.08	0.089	0.054	0.055	0.067		14.7503	0.498	0.479	0.48	0.115	0.114	0.115	0.117	0.115	0.114	0.117	0.116	0.119	0.116	0.127	0.117
15.0003	0.244	0.251	0.253	1.062	1.069	1.088	0.911	0.964	0.902	0.845	0.843	0.797	0.929	0.87	0.843		15.0003	0.542	0.588	0.551	0.057	0.054	0.065	0.06	0.068	0.068	0.06	0.081	0.089	0.054	0.055	0.067		15.0003	0.505	0.489	0.489	0.115	0.114	0.115	0.117	0.115	0.114	0.117	0.117	0.12	0.116	0.125	0.117
15.2503	0.244	0.251	0.253	1.056	1.061	0.943	0.938	0.877	0.902	0.892	0.885	0.832	0.972	0.909	0.885		15.2503	0.557	0.598	0.565	0.057	0.053	0.064	0.06	0.068	0.068	0.06	0.081	0.089	0.054	0.056	0.067		15.2503	0.513	0.496	0.495	0.116	0.115	0.115	0.116	0.115	0.114	0.117	0.116	0.119	0.116	0.125	0.117
15.5003	0.243	0.25	0.252	1.043	1.051	0.925	0.961	0.896	0.925	0.922	0.918	0.871	1.007	0.947	0.921		15.5003	0.565	0.619	0.576	0.057	0.053	0.065	0.06	0.068	0.068	0.06	0.081	0.089	0.054	0.056	0.067		15.5003	0.52	0.503	0.503	0.115	0.114	0.114	0.116	0.115	0.114	0.117	0.117	0.12	0.116	0.127	0.117
15.7503	0.242	0.25	0.251	1.044	1.049	0.902	0.98	0.887	0.931	0.943	0.944	0.902	1.027	0.967	0.945		15.7503	0.579	0.63	0.591	0.056	0.052	0.064	0.06	0.068	0.068	0.06	0.081	0.089	0.055	0.056	0.067		15.7503	0.528	0.51	0.51	0.116	0.114	0.115	0.116	0.115	0.114	0.117	0.117	0.12	0.116	0.126	0.117
16.0003	0.242	0.25	0.251	1.039	1.032	0.896	1.01	0.911	0.933	0.973	0.976	0.939	1.063	1	0.98		16.0003	0.593	0.649	0.61	0.056	0.052	0.063	0.06	0.068	0.068	0.06	0.08	0.089	0.054	0.055	0.067		16.0003	0.536	0.516	0.518	0.115	0.115	0.115	0.116	0.115	0.114	0.117	0.116	0.12	0.116	0.127	0.117
16.2503	0.241	0.248	0.25	1.041	1.035	0.887	1.029	0.929	0.935	0.996	1.003	0.972	1.076	1.017	1.002		16.2503	0.602	0.654	0.616	0.056	0.052	0.063	0.061	0.069	0.068	0.061	0.082	0.09	0.054	0.055	0.067		16.2503	0.545	0.526	0.527	0.115	0.115	0.115	0.116	0.115	0.115	0.117	0.117	0.12	0.116	0.127	0.117
16.5003	0.241	0.249	0.25	1.038	1.034	0.885	1.072	0.957	0.955	1.038	1.048	1.014	1.121	1.065	1.05		16.5003	0.613	0.677	0.633	0.056	0.052	0.062	0.059	0.068	0.067	0.06	0.08	0.089	0.054	0.055	0.067		16.5003	0.551	0.533	0.534	0.116	0.115	0.115	0.116	0.115	0.115	0.117	0.117	0.121	0.116	0.127	0.117
16.7503	0.241	0.249	0.25	1.043	1.038	0.891	1.104	0.987	0.977	1.056	1.069	1.04	1.128	1.072	1.063		16.7503	0.628	0.688	0.641	0.056	0.052	0.062	0.06	0.069	0.068	0.06	0.081	0.089	0.054	0.056	0.067		16.7503	0.561	0.54	0.541	0.115	0.115	0.115	0.116	0.115	0.114	0.117	0.117	0.121	0.116	0.127	0.118
17.0003	0.242	0.249	0.25	1.046	1.041	0.893	1.251	1.02	1.027	1.064	1.077	1.053	1.131	1.075	1.071		17.0003	0.635	0.685	0.645	0.058	0.054	0.064	0.061	0.069	0.068	0.06	0.081	0.089	0.055	0.056	0.067		17.0003	0.568	0.546	0.548	0.116	0.115	0.115	0.116	0.115	0.114	0.117	0.117	0.121	0.116	0.128	0.118
17.2503	0.242	0.25	0.251	1.047	1.042	0.894	1.332	1.143	1.23	1.082	1.092	1.073	1.141	1.08	1.085		17.2503	0.645	0.692	0.653	0.058	0.054	0.064	0.06	0.068	0.067	0.06	0.081	0.089	0.055	0.057	0.067		17.2503	0.576	0.556	0.557	0.117	0.115	0.116	0.116	0.115	0.114	0.117	0.117	0.121	0.116	0.127	0.118
17.5003	0.241	0.249	0.251	1.049	1.042	0.896	1.35	1.135	1.268	1.104	1.114	1.095	1.151	1.091	1.096		17.5003	0.657	0.705	0.663	0.058	0.054	0.064	0.06	0.067	0.067	0.06	0.081	0.089	0.055	0.057	0.067		17.5003	0.584	0.563	0.564	0.118	0.115	0.116	0.116	0.115	0.115	0.117	0.117	0.121	0.116	0.127	0.118
17.7503	0.241	0.249	0.251	1.046	1.038	0.885	1.362	1.137	1.22	1.131	1.138	1.142	1.172	1.121	1.103		17.7503	0.67	0.716	0.677	0.057	0.053	0.064	0.061	0.068	0.068	0.06	0.081	0.089	0.056	0.057	0.067		17.7503	0.593	0.571	0.571	0.117	0.115	0.116	0.115	0.115	0.115	0.118	0.117	0.121	0.117	0.129	0.118
18.0003	0.24	0.248	0.249	1.042	1.034	0.885	1.367	1.15	1.235	1.147	1.152	1.167	1.189	1.143	1.128		18.0003	0.685	0.727	0.686	0.058	0.054	0.065	0.06	0.069	0.067	0.06	0.081	0.089	0.056	0.057	0.067		18.0003	0.6	0.579	0.579	0.118	0.116	0.116	0.115	0.115	0.115	0.118	0.117	0.122	0.117	0.129	0.118
18.2503	0.239	0.247	0.249	1.042	1.032	0.885	1.37	1.163	1.249	1.17	1.172	1.171	1.206	1.165	1.156		18.2503	0.694	0.742	0.702	0.058	0.054	0.065	0.06	0.068	0.067	0.06	0.081	0.089	0.056	0.057	0.067		18.2503	0.595	0.587	0.587	0.117	0.116	0.115	0.115	0.116	0.115	0.118	0.117	0.122	0.116	0.129	0.118
18.5003	0.24	0.247	0.249	1.042	1.03	0.885	1.377	1.181	1.263	1.205	1.19	1.254	1.221	1.18	1.183		18.5003	0.7	0.745	0.706	0.057	0.053	0.064	0.061	0.068	0.068	0.061	0.081	0.089	0.056	0.058	0.067		18.5003	0.591	0.595	0.596	0.117	0.115	0.115	0.115	0.115	0.115	0.118	0.117	0.122	0.116	0.128	0.118
18.7503	0.24	0.248	0.249	1.041	1.028	0.88	1.379	1.196	1.275	1.273	1.281	1.29	1.243	1.209	1.213		18.7503	0.707	0.771	0.713	0.058	0.054	0.065	0.062	0.069	0.069	0.061	0.081	0.089	0.056	0.058	0.068		18.7503	0.587	0.604	0.604	0.117	0.115	0.116	0.115	0.116	0.115	0.118	0.118	0.122	0.116	0.129	0.119
19.0003	0.24	0.248	0.25	1.044	1.014	0.876	1.388	1.209	1.289	1.285	1.299	1.301	1.256	1.221	1.227		19.0003	0.722	0.779	0.732	0.057	0.053	0.065	0.06	0.069	0.067	0.061	0.081	0.09	0.057	0.059	0.068		19.0003	0.583	0.6	0.61	0.117	0.116	0.116	0.116	0.116	0.115	0.118	0.118	0.122	0.116	0.128	0.119
19.2503	0.24	0.247	0.249	1.046	1.015	0.871	1.392	1.218	1.298	1.293	1.307	1.307	1.269	1.232	1.241		19.2503	0.728	0.784	0.736	0.057	0.052	0.064	0.061	0.069	0.068	0.061	0.081	0.09	0.057	0.059	0.068		19.2503	0.58	0.594	0.61	0.118	0.116	0.116	0.115	0.116	0.115	0.118	0.118	0.122	0.116	0.13	0.118
19.5003	0.238	0.246	0.248	1.04	1.007	0.854	1.399	1.233	1.312	1.295	1.308	1.312	1.27	1.234	1.245		19.5003	0.735	0.787	0.735	0.057	0.053	0.064	0.061	0.069	0.068	0.061	0.082	0.09	0.057	0.06	0.068		19.5003	0.576	0.59	0.606	0.118	0.116	0.116	0.115	0.115	0.114	0.117	0.118	0.122	0.117	0.13	0.118
19.7503	0.238	0.246	0.248	1.036	1.002	0.834	1.402	1.241	1.318	1.298	1.31	1.316	1.279	1.243	1.254		19.7503	0.752	0.795	0.752	0.057	0.053	0.065	0.062	0.069	0.068	0.061	0.081	0.09	0.058	0.06	0.068		19.7503	0.574	0.586	0.602	0.117	0.116	0.116	0.115	0.116	0.115	0.118	0.118	0.122	0.117	0.129	0.118
20.0003	0.237	0.246	0.248	1.029	0.997	0.818	1.404	1.242	1.322	1.295	1.307	1.314	1.282	1.251	1.263		20.0003	0.753	0.796	0.751	0.057	0.053	0.064	0.062	0.069	0.068	0.062	0.082	0.09	0.057	0.059	0.067		20.0003	0.57	0.583	0.598	0.116	0.116	0.116	0.115	0.115	0.114	0.117	0.117	0.122	0.117	0.129	0.118
20.2503	0.236	0.244	0.246	1.025	0.989	0.814	1.406	1.248	1.331	1.301	1.313	1.322	1.296	1.265	1.279		20.2503	0.745	0.81	0.745	0.058	0.053	0.065	0.062	0.07	0.068	0.062	0.082	0.09	0.054	0.06	0.069		20.2503	0.568	0.579	0.595	0.117	0.116	0.116	0.115	0.115	0.114	0.118	0.117	0.122	0.117	0.13	0.118
20.5003	0.238	0.246	0.248	1.019	0.982	0.803	1.412	1.262	1.341	1.306	1.317	1.327	1.315	1.283	1.296		20.5003	0.745	0.808	0.743	0.058	0.054	0.065	0.062	0.07	0.069	0.062	0.082	0.09	0.054	0.061	0.069		20.5003	0.565	0.575	0.591	0.117	0.116	0.116	0.116	0.116	0.115	0.117	0.117	0.122	0.117	0.129	0.118
20.7503	0.236	0.245	0.246	1.018	0.981	0.792	1.412	1.263	1.343	1.312	1.323	1.333	1.323	1.295	1.31		20.7503	0.739	0.838	0.739	0.059	0.055	0.066	0.062	0.071	0.068	0.061	0.081	0.089	0.054	0.061	0.069		20.7503	0.564	0.572	0.588	0.118	0.116	0.116	0.116	0.116	0.115	0.118	0.117	0.122	0.117	0.13	0.118
21.0003	0.236	0.245	0.246	1.018	0.98	0.788	1.419	1.275	1.361	1.321	1.332	1.343	1.329	1.301	1.317		21.0003	0.739	0.831	0.74	0.059	0.054	0.065	0.063	0.07	0.068	0.061	0.082	0.089	0.053	0.06	0.068		21.0003	0.562	0.57	0.586	0.118	0.117	0.117	0.116	0.116	0.115	0.118	0.117	0.122	0.117	0.13	0.118
21.2503	0.237	0.245	0.247	1.025	0.995	0.763	1.428	1.288	1.367	1.328	1.339	1.35	1.335	1.31	1.326		21.2503	0.737	0.823	0.739	0.059	0.055	0.067	0.062	0.07	0.068	0.061	0.081	0.089	0.053	0.06	0.068		21.2503	0.562	0.57	0.587	0.119	0.117	0.117	0.116	0.116	0.115	0.118	0.118	0.122	0.117	0.129	0.118
21.5003	0.236	0.245	0.247	0.913	0.988	0.752	1.432	1.298	1.374	1.332	1.343	1.354	1.339	1.314	1.329		21.5003	0.739	0.826	0.739	0.057	0.053	0.064	0.063	0.07	0.068	0.061	0.082	0.089	0.053	0.06	0.068		21.5003	0.557	0.568	0.584	0.117	0.116	0.117	0.116	0.116	0.115	0.117	0.117	0.122	0.117	0.129	0.117
21.7503	0.236	0.245	0.247	0.871	0.987	0.753	1.433	1.303	1.382	1.337	1.346	1.359	1.344	1.319	1.334		21.7503	0.739	0.811	0.737	0.058	0.053	0.064	0.062	0.07	0.068	0.061	0.082	0.089	0.055	0.062	0.07		21.7503	0.557	0.566	0.582	0.117	0.116	0.117	0.116	0.116	0.115	0.118	0.118	0.122	0.117	0.129	0.118
22.0003	0.236	0.245	0.246	0.888	0.98	0.748	1.436	1.308	1.391	1.339	1.348	1.36	1.344	1.32	1.335		22.0003	0.735	0.805	0.733	0.058	0.054	0.064	0.063	0.071	0.069	0.062	0.082	0.088	0.054	0.062	0.069		22.0003	0.556	0.565	0.582	0.118	0.117	0.117	0.116	0.116	0.115	0.118	0.118	0.122	0.117	0.129	0.118
22.2503	0.235	0.244	0.246	0.892	0.93	0.741	1.436	1.31	1.391	1.34	1.349	1.36	1.345	1.32	1.337		22.2503	0.728	0.794	0.727	0.057	0.053	0.063	0.063	0.071	0.069	0.062	0.082	0.088	0.054	0.062	0.069		22.2503	0.555	0.564	0.581	0.119	0.117	0.117	0.116	0.116	0.115	0.118	0.118	0.122	0.117	0.13	0.118
22.5003	0.234	0.244	0.245	0.848	0.929	0.742	1.44	1.317	1.394	1.337	1.344	1.357	1.347	1.322	1.341		22.5003	0.736	0.786	0.73	0.057	0.053	0.063	0.064	0.071	0.069	0.062	0.082	0.088	0.055	0.062	0.069		22.5003	0.555	0.562	0.578	0.118	0.117	0.117	0.116	0.116	0.115	0.118	0.117	0.122	0.117	0.129	0.118
22.7503	0.233	0.242	0.244	0.823	0.923	0.736	1.439	1.318	1.395	1.34	1.349	1.362	1.349	1.326	1.344		22.7503	0.736	0.779	0.728	0.057	0.052	0.063	0.063	0.07	0.068	0.062	0.082	0.088	0.054	0.062	0.068		22.7503	0.554	0.562	0.576	0.118	0.116	0.117	0.116	0.116	0.115	0.117	0.118	0.122	0.117	0.13	0.118
23.0003	0.233	0.243	0.245	0.836	0.936	0.752	1.442	1.321	1.401	1.345	1.353	1.367	1.36	1.337	1.355		23.0003	0.74	0.791	0.733	0.057	0.053	0.063	0.063	0.071	0.068	0.062	0.082	0.088	0.054	0.062	0.068		23.0003	0.554	0.563	0.577	0.119	0.117	0.117	0.116	0.116	0.115	0.118	0.119	0.123	0.117	0.13	0.118
23.2503	0.231	0.24	0.242	0.82	1.048	0.756	1.45	1.329	1.41	1.359	1.367	1.384	1.377	1.355	1.371		23.2503	0.744	0.798	0.737	0.056	0.052	0.062	0.062	0.07	0.068	0.062	0.082	0.088	0.053	0.061	0.068		23.2503	0.552	0.559	0.576	0.119	0.117	0.118	0.116	0.116	0.115	0.118	0.118	0.123	0.117	0.131	0.118
23.5003	0.231	0.241	0.243	0.812	1.047	0.755	1.454	1.342	1.416	1.358	1.364	1.382	1.375	1.352	1.369		23.5003	0.734	0.78	0.727	0.058	0.053	0.063	0.062	0.07	0.068	0.062	0.082	0.087	0.053	0.061	0.069		23.5003	0.553	0.558	0.573	0.119	0.117	0.117	0.116	0.116	0.115	0.118	0.118	0.123	0.117	0.13	0.118
23.7503	0.233	0.242	0.244	0.809	1.045	0.751	1.467	1.356	1.436	1.365	1.373	1.391	1.379	1.357	1.373		23.7503	0.727	0.771	0.726	0.058	0.054	0.063	0.062	0.07	0.068	0.062	0.082	0.088	0.053	0.061	0.069		23.7503	0.553	0.558	0.575	0.12	0.119	0.119	0.116	0.116	0.115	0.118	0.118	0.123	0.117	0.131	0.118
24.0003	0.232	0.242	0.244	0.798	1.039	0.744	1.467	1.358	1.432	1.368	1.375	1.393	1.385	1.363	1.378		24.0003	0.732	0.785	0.725	0.057	0.053	0.064	0.062	0.07	0.069	0.062	0.082	0.088	0.053	0.061	0.069		24.0003	0.555	0.559	0.574	0.118	0.117	0.117	0.116	0.116	0.116	0.118	0.118	0.123	0.117	0.132	0.119
24.2503	0.232	0.241	0.244	0.795	1.04	0.738	1.471	1.369	1.44	1.375	1.381	1.399	1.387	1.365	1.379		24.2503	0.731	0.77	0.721	0.057	0.053	0.063	0.062	0.07	0.069	0.062	0.082	0.088	0.054	0.061	0.069		24.2503	0.552	0.558	0.573	0.118	0.117	0.118	0.116	0.116	0.116	0.118	0.118	0.124	0.117	0.132	0.119
24.5003	0.231	0.241	0.243	0.793	1.036	0.763	1.472	1.372	1.444	1.374	1.379	1.398	1.388	1.365	1.381		24.5003	0.729	0.758	0.718	0.057	0.053	0.063	0.062	0.07	0.069	0.062	0.082	0.088	0.054	0.062	0.069		24.5003	0.552	0.559	0.573	0.118	0.117	0.117	0.116	0.116	0.115	0.118	0.118	0.123	0.117	0.131	0.119
24.7503	0.231	0.241	0.243	0.789	1.034	0.755	1.475	1.376	1.447	1.372	1.379	1.399	1.385	1.363	1.379		24.7503	0.73	0.753	0.717	0.056	0.052	0.063	0.063	0.07	0.069	0.063	0.082	0.087	0.054	0.062	0.069		24.7503	0.552	0.559	0.572	0.118	0.118	0.117	0.116	0.116	0.116	0.118	0.118	0.124	0.117	0.132	0.119
25.0003	0.23	0.239	0.242	0.786	1.033	0.753	1.477	1.388	1.458	1.376	1.382	1.402	1.39	1.367	1.385		25.0003	0.727	0.75	0.72	0.056	0.052	0.063	0.063	0.071	0.069	0.063	0.082	0.088	0.055	0.062	0.069		25.0003	0.553	0.559	0.573	0.119	0.118	0.118	0.117	0.116	0.115	0.118	0.118	0.124	0.117	0.131	0.119
25.2503	0.229	0.24	0.241	0.782	1.03	0.748	1.479	1.396	1.467	1.377	1.382	1.402	1.388	1.364	1.383		25.2503	0.729	0.744	0.717	0.056	0.052	0.062	0.063	0.071	0.069	0.063	0.082	0.088	0.055	0.063	0.069		25.2503	0.552	0.56	0.573	0.119	0.118	0.119	0.116	0.116	0.115	0.118	0.118	0.124	0.117	0.131	0.119
25.5003	0.229	0.239	0.241	0.78	1.028	0.747	1.479	1.405	1.472	1.38	1.385	1.406	1.391	1.367	1.385		25.5003	0.727	0.745	0.718	0.056	0.052	0.063	0.063	0.071	0.069	0.063	0.082	0.088	0.055	0.063	0.07		25.5003	0.551	0.558	0.572	0.12	0.119	0.119	0.117	0.116	0.115	0.118	0.118	0.124	0.117	0.132	0.119
25.7503	0.229	0.239	0.241	0.776	1.027	0.744	1.484	1.409	1.48	1.382	1.386	1.408	1.393	1.368	1.387		25.7503	0.723	0.739	0.715	0.056	0.052	0.063	0.064	0.071	0.069	0.063	0.082	0.088	0.056	0.063	0.07		25.7503	0.552	0.559	0.571	0.119	0.118	0.118	0.117	0.116	0.115	0.118	0.118	0.124	0.117	0.133	0.119
26.0003	0.23	0.241	0.243	0.775	1.025	0.744	1.479	1.414	1.485	1.385	1.386	1.408	1.394	1.371	1.389		26.0003	0.721	0.739	0.716	0.057	0.052	0.063	0.064	0.071	0.069	0.064	0.082	0.088	0.056	0.064	0.07		26.0003	0.552	0.558	0.572	0.12	0.119	0.118	0.117	0.116	0.115	0.118	0.118	0.124	0.117	0.132	0.119
26.2503	0.229	0.24	0.242	0.772	1.025	0.74	1.486	1.424	1.492	1.398	1.397	1.42	1.401	1.379	1.396		26.2503	0.727	0.74	0.718	0.057	0.053	0.064	0.064	0.071	0.069	0.064	0.082	0.088	0.055	0.063	0.07		26.2503	0.552	0.557	0.571	0.118	0.117	0.117	0.116	0.115	0.114	0.118	0.118	0.124	0.117	0.131	0.119
26.5003	0.229	0.24	0.242	0.772	1.025	0.754	1.489	1.432	1.497	1.404	1.405	1.425	1.404	1.381	1.4		26.5003	0.725	0.734	0.714	0.057	0.052	0.065	0.064	0.071	0.069	0.063	0.082	0.088	0.056	0.064	0.07		26.5003	0.552	0.557	0.57	0.118	0.118	0.118	0.117	0.116	0.114	0.118	0.119	0.124	0.117	0.12	0.119
26.7503	0.227	0.239	0.24	0.769	1.022	0.751	1.486	1.437	1.499	1.41	1.409	1.427	1.411	1.389	1.407		26.7503	0.733	0.748	0.727	0.056	0.052	0.063	0.064	0.071	0.069	0.064	0.083	0.088	0.056	0.064	0.07		26.7503	0.553	0.556	0.57	0.119	0.119	0.118	0.117	0.116	0.114	0.119	0.119	0.125	0.117	0.12	0.119
27.0003	0.228	0.239	0.241	0.768	1.022	0.75	1.489	1.437	1.501	1.414	1.414	1.432	1.411	1.388	1.407		27.0003	0.724	0.737	0.719	0.057	0.052	0.063	0.064	0.072	0.07	0.064	0.083	0.088	0.055	0.064	0.07		27.0003	0.553	0.557	0.569	0.119	0.118	0.119	0.117	0.116	0.115	0.118	0.119	0.125	0.117	0.12	0.12
27.2503	0.229	0.239	0.241	0.766	1.02	0.749	1.487	1.443	1.501	1.414	1.414	1.433	1.41	1.389	1.408		27.2503	0.718	0.729	0.715	0.057	0.052	0.064	0.064	0.071	0.069	0.064	0.083	0.088	0.056	0.064	0.071		27.2503	0.553	0.555	0.568	0.119	0.118	0.119	0.117	0.116	0.115	0.119	0.119	0.125	0.117	0.12	0.119
27.5003	0.227	0.238	0.24	0.765	1.019	0.748	1.495	1.454	1.505	1.415	1.413	1.432	1.407	1.389	1.408		27.5003	0.723	0.729	0.715	0.057	0.053	0.065	0.065	0.072	0.07	0.063	0.082	0.088	0.056	0.064	0.07		27.5003	0.552	0.555	0.568	0.119	0.119	0.119	0.117	0.116	0.115	0.118	0.118	0.125	0.117	0.12	0.12
27.7503	0.228	0.239	0.241	0.762	1.017	0.746	1.487	1.447	1.507	1.414	1.411	1.427	1.411	1.389	1.407		27.7503	0.725	0.732	0.714	0.057	0.052	0.065	0.064	0.072	0.07	0.063	0.082	0.088	0.056	0.064	0.07		27.7503	0.551	0.554	0.566	0.118	0.118	0.119	0.116	0.116	0.115	0.118	0.118	0.125	0.117	0.12	0.119
28.0003	0.226	0.238	0.239	0.767	1.017	0.744	1.49	1.456	1.512	1.422	1.423	1.439	1.417	1.397	1.415		28.0003	0.724	0.728	0.718	0.057	0.053	0.065	0.065	0.072	0.07	0.063	0.082	0.088	0.056	0.064	0.07		28.0003	0.552	0.555	0.568	0.119	0.118	0.118	0.117	0.117	0.116	0.119	0.119	0.125	0.118	0.121	0.12
28.2503	0.227	0.238	0.24	0.767	1.017	0.742	1.494	1.46	1.513	1.422	1.421	1.438	1.417	1.395	1.413		28.2503	0.719	0.72	0.709	0.057	0.053	0.066	0.065	0.072	0.07	0.063	0.082	0.088	0.057	0.064	0.07		28.2503	0.553	0.557	0.57	0.12	0.119	0.119	0.117	0.117	0.116	0.119	0.119	0.125	0.118	0.121	0.12
28.5003	0.226	0.238	0.24	0.763	1.014	0.743	1.492	1.463	1.516	1.424	1.421	1.438	1.416	1.396	1.415		28.5003	0.716	0.717	0.708	0.057	0.053	0.066	0.065	0.073	0.07	0.064	0.083	0.088	0.057	0.064	0.071		28.5003	0.552	0.558	0.571	0.12	0.119	0.119	0.117	0.117	0.116	0.118	0.119	0.125	0.118	0.121	0.12
28.7503	0.225	0.237	0.239	0.763	1.015	0.741	1.49	1.466	1.517	1.424	1.422	1.438	1.419	1.398	1.415		28.7503	0.717	0.715	0.708	0.057	0.053	0.067	0.066	0.073	0.07	0.064	0.083	0.088	0.057	0.065	0.071		28.7503	0.553	0.557	0.571	0.12	0.119	0.119	0.117	0.117	0.116	0.118	0.119	0.125	0.117	0.12	0.12
29.0003	0.226	0.238	0.24	0.761	1.012	0.74	1.49	1.471	1.515	1.423	1.421	1.438	1.419	1.397	1.416		29.0003	0.719	0.713	0.707	0.057	0.053	0.067	0.066	0.072	0.07	0.064	0.083	0.088	0.058	0.065	0.071		29.0003	0.553	0.557	0.572	0.119	0.119	0.119	0.117	0.117	0.116	0.119	0.119	0.125	0.118	0.121	0.12
29.2503	0.225	0.237	0.239	0.759	1.011	0.738	1.492	1.469	1.519	1.43	1.426	1.443	1.424	1.403	1.421		29.2503	0.726	0.727	0.717	0.056	0.051	0.065	0.064	0.071	0.069	0.064	0.083	0.089	0.058	0.066	0.071		29.2503	0.553	0.555	0.57	0.119	0.12	0.12	0.117	0.117	0.116	0.118	0.119	0.125	0.118	0.121	0.12
29.5003	0.226	0.238	0.239	0.758	1.009	0.738	1.495	1.478	1.521	1.429	1.427	1.444	1.424	1.403	1.42		29.5003	0.719	0.718	0.71	0.056	0.052	0.065	0.065	0.072	0.07	0.064	0.083	0.089	0.058	0.066	0.071		29.5003	0.552	0.553	0.566	0.119	0.119	0.119	0.117	0.117	0.116	0.119	0.119	0.126	0.118	0.121	0.12
29.7503	0.225	0.237	0.239	0.757	1.01	0.735	1.491	1.476	1.523	1.428	1.425	1.441	1.421	1.401	1.419		29.7503	0.715	0.711	0.704	0.056	0.052	0.066	0.065	0.072	0.07	0.064	0.083	0.089	0.058	0.066	0.072		29.7503	0.554	0.555	0.569	0.119	0.12	0.12	0.117	0.117	0.116	0.119	0.119	0.126	0.118	0.121	0.12
30.0003	0.225	0.237	0.238	0.756	1.009	0.735	1.488	1.478	1.516	1.427	1.424	1.44	1.42	1.4	1.419		30.0003	0.717	0.706	0.704	0.057	0.052	0.066	0.065	0.072	0.069	0.065	0.083	0.089	0.059	0.066	0.072		30.0003	0.554	0.556	0.568	0.119	0.119	0.12	0.114	0.116	0.115	0.119	0.119	0.126	0.118	0.121	0.12
30.2503	0.225	0.237	0.239	0.755	1.007	0.734	1.488	1.478	1.52	1.427	1.423	1.441	1.421	1.401	1.419		30.2503	0.717	0.709	0.705	0.056	0.052	0.067	0.065	0.072	0.07	0.065	0.084	0.089	0.059	0.067	0.073		30.2503	0.554	0.555	0.569	0.119	0.119	0.12	0.114	0.117	0.116	0.119	0.119	0.126	0.118	0.121	0.12
30.5003	0.225	0.237	0.239	0.754	1.006	0.733	1.485	1.48	1.521	1.427	1.424	1.441	1.42	1.402	1.42		30.5003	0.711	0.716	0.706	0.057	0.052	0.067	0.065	0.072	0.07	0.065	0.084	0.089	0.059	0.067	0.073		30.5003	0.554	0.556	0.568	0.12	0.12	0.12	0.114	0.117	0.116	0.119	0.119	0.126	0.118	0.121	0.12
30.7503	0.224	0.237	0.239	0.753	1.006	0.731	1.486	1.485	1.522	1.427	1.426	1.442	1.423	1.404	1.423		30.7503	0.705	0.717	0.703	0.057	0.053	0.067	0.067	0.073	0.07	0.065	0.084	0.089	0.06	0.068	0.073		30.7503	0.553	0.555	0.567	0.12	0.12	0.12	0.114	0.117	0.115	0.119	0.119	0.126	0.118	0.121	0.12
31.0003	0.223	0.235	0.237	0.752	1.005	0.731	1.493	1.484	1.52	1.433	1.43	1.446	1.429	1.411	1.427		31.0003	0.714	0.713	0.709	0.056	0.052	0.067	0.065	0.072	0.069	0.065	0.084	0.09	0.06	0.069	0.073		31.0003	0.554	0.554	0.567	0.119	0.119	0.12	0.114	0.117	0.116	0.119	0.119	0.126	0.118	0.121	0.121
31.2503	0.223	0.236	0.237	0.749	1.004	0.727	1.49	1.484	1.52	1.434	1.429	1.446	1.428	1.409	1.425		31.2503	0.716	0.706	0.705	0.056	0.052	0.067	0.066	0.072	0.07	0.065	0.084	0.09	0.06	0.069	0.073		31.2503	0.554	0.555	0.566	0.119	0.119	0.12	0.114	0.117	0.116	0.119	0.119	0.126	0.118	0.121	0.121
31.5003	0.223	0.236	0.237	0.757	1.002	0.727	1.493	1.489	1.519	1.435	1.429	1.448	1.425	1.409	1.424		31.5003	0.72	0.709	0.709	0.056	0.052	0.067	0.066	0.072	0.07	0.065	0.084	0.09	0.06	0.069	0.073		31.5003	0.554	0.553	0.563	0.119	0.119	0.12	0.114	0.116	0.115	0.119	0.119	0.126	0.118	0.121	0.12
31.7503	0.223	0.236	0.237	0.756	1.001	0.726	1.491	1.488	1.52	1.434	1.429	1.447	1.429	1.411	1.425		31.7503	0.718	0.71	0.708	0.056	0.051	0.068	0.066	0.072	0.07	0.065	0.084	0.09	0.06	0.069	0.073		31.7503	0.553	0.554	0.562	0.119	0.12	0.12	0.114	0.117	0.115	0.119	0.119	0.126	0.118	0.122	0.121
32.0003	0.223	0.237	0.238	0.755	1	0.725	1.491	1.493	1.52	1.435	1.428	1.447	1.428	1.41	1.425		32.0003	0.716	0.705	0.704	0.056	0.052	0.068	0.066	0.073	0.07	0.066	0.085	0.09	0.061	0.07	0.073		32.0003	0.554	0.552	0.561	0.119	0.12	0.12	0.114	0.116	0.115	0.12	0.123	0.126	0.118	0.122	0.121
32.2503	0.223	0.236	0.237	0.755	1.001	0.725	1.492	1.492	1.523	1.434	1.429	1.447	1.427	1.409	1.424		32.2503	0.711	0.699	0.7	0.057	0.053	0.069	0.066	0.072	0.07	0.066	0.085	0.09	0.061	0.07	0.074		32.2503	0.554	0.551	0.561	0.119	0.12	0.12	0.114	0.116	0.115	0.12	0.123	0.127	0.119	0.122	0.121
32.5003	0.223	0.236	0.237	0.754	0.999	0.725	1.486	1.492	1.519	1.431	1.426	1.447	1.426	1.409	1.424		32.5003	0.704	0.7	0.7	0.058	0.053	0.069	0.067	0.073	0.07	0.066	0.085	0.091	0.061	0.07	0.074		32.5003	0.553	0.55	0.561	0.12	0.12	0.12	0.114	0.116	0.115	0.12	0.125	0.127	0.119	0.122	0.121
32.7503	0.223	0.236	0.237	0.754	1	0.723	1.487	1.492	1.524	1.428	1.422	1.444	1.423	1.404	1.419		32.7503	0.704	0.691	0.694	0.057	0.053	0.07	0.067	0.073	0.07	0.066	0.084	0.09	0.061	0.07	0.074		32.7503	0.554	0.55	0.56	0.12	0.12	0.12	0.114	0.116	0.115	0.119	0.125	0.127	0.119	0.122	0.121
33.0003	0.223	0.237	0.237	0.751	0.997	0.721	1.49	1.498	1.522	1.429	1.423	1.447	1.429	1.409	1.425		33.0003	0.707	0.697	0.696	0.058	0.054	0.07	0.068	0.074	0.07	0.066	0.085	0.09	0.065	0.074	0.077		33.0003	0.553	0.55	0.562	0.12	0.12	0.121	0.114	0.117	0.116	0.12	0.125	0.127	0.119	0.123	0.122
33.2503	0.222	0.236	0.237	0.75	0.995	0.72	1.493	1.499	1.518	1.43	1.42	1.441	1.428	1.406	1.42		33.2503	0.714	0.704	0.704	0.058	0.054	0.071	0.068	0.073	0.07	0.067	0.085	0.091	0.066	0.075	0.078		33.2503	0.552	0.551	0.563	0.121	0.12	0.12	0.114	0.117	0.116	0.12	0.124	0.127	0.119	0.122	0.121
33.5003	0.222	0.235	0.236	0.748	0.995	0.717	1.496	1.501	1.527	1.437	1.428	1.452	1.438	1.416	1.426		33.5003	0.718	0.709	0.709	0.057	0.052	0.071	0.068	0.073	0.071	0.066	0.084	0.09	0.065	0.075	0.078		33.5003	0.553	0.552	0.563	0.12	0.12	0.12	0.114	0.117	0.117	0.12	0.121	0.127	0.119	0.122	0.121
33.7503	0.221	0.234	0.236	0.745	0.995	0.713	1.508	1.515	1.536	1.445	1.437	1.463	1.444	1.424	1.435		33.7503	0.716	0.709	0.706	0.056	0.052	0.073	0.068	0.073	0.071	0.066	0.084	0.09	0.062	0.072	0.076		33.7503	0.552	0.552	0.563	0.121	0.12	0.12	0.114	0.117	0.117	0.12	0.122	0.127	0.119	0.123	0.122
34.0003	0.222	0.235	0.236	0.743	0.993	0.714	1.506	1.511	1.532	1.442	1.43	1.455	1.438	1.419	1.429		34.0003	0.713	0.702	0.701	0.056	0.052	0.073	0.068	0.072	0.071	0.066	0.085	0.09	0.063	0.073	0.077		34.0003	0.552	0.55	0.563	0.122	0.121	0.121	0.114	0.117	0.117	0.12	0.12	0.127	0.119	0.122	0.122
34.2503	0.221	0.233	0.236	0.743	0.992	0.714	1.504	1.51	1.53	1.442	1.432	1.459	1.442	1.42	1.431		34.2503	0.706	0.702	0.702	0.056	0.052	0.073	0.068	0.073	0.071	0.066	0.085	0.091	0.064	0.074	0.078		34.2503	0.552	0.55	0.562	0.121	0.122	0.122	0.114	0.117	0.117	0.12	0.12	0.127	0.119	0.122	0.122
34.5003	0.222	0.234	0.236	0.741	0.991	0.713	1.507	1.516	1.54	1.447	1.438	1.465	1.445	1.425	1.437		34.5003	0.715	0.704	0.702	0.057	0.052	0.074	0.067	0.072	0.071	0.066	0.085	0.09	0.063	0.073	0.078		34.5003	0.552	0.548	0.562	0.12	0.12	0.121	0.114	0.117	0.117	0.12	0.121	0.128	0.119	0.123	0.122
34.7503	0.221	0.234	0.236	0.741	0.99	0.713	1.502	1.517	1.536	1.438	1.43	1.457	1.432	1.415	1.428		34.7503	0.703	0.688	0.69	0.057	0.053	0.073	0.068	0.072	0.071	0.067	0.086	0.091	0.064	0.073	0.078		34.7503	0.551	0.55	0.563	0.121	0.121	0.121	0.114	0.117	0.116	0.12	0.121	0.128	0.119	0.123	0.122
35.0003	0.221	0.234	0.236	0.74	0.988	0.712	1.504	1.514	1.537	1.441	1.433	1.46	1.438	1.417	1.43		35.0003	0.709	0.696	0.697	0.057	0.053	0.074	0.068	0.072	0.071	0.067	0.086	0.091	0.064	0.073	0.078		35.0003	0.551	0.55	0.562	0.121	0.121	0.122	0.114	0.117	0.117	0.12	0.12	0.128	0.119	0.123	0.123
35.2503	0.22	0.233	0.235	0.739	0.989	0.711	1.504	1.512	1.537	1.438	1.431	1.459	1.434	1.414	1.426		35.2503	0.709	0.694	0.697	0.057	0.052	0.075	0.068	0.072	0.071	0.067	0.086	0.091	0.064	0.074	0.078		35.2503	0.551	0.551	0.564	0.121	0.122	0.122	0.114	0.117	0.116	0.12	0.121	0.128	0.119	0.123	0.122
35.5003	0.22	0.233	0.235	0.74	0.989	0.711	1.499	1.512	1.532	1.436	1.429	1.458	1.433	1.41	1.424		35.5003	0.699	0.688	0.694	0.058	0.054	0.075	0.069	0.073	0.071	0.067	0.086	0.091	0.065	0.075	0.079		35.5003	0.551	0.551	0.563	0.121	0.122	0.122	0.114	0.117	0.117	0.12	0.12	0.128	0.119	0.122	0.122
35.7503	0.22	0.233	0.235	0.739	0.987	0.709	1.502	1.511	1.535	1.443	1.429	1.455	1.438	1.413	1.427		35.7503	0.705	0.695	0.697	0.057	0.053	0.075	0.069	0.074	0.071	0.068	0.086	0.091	0.065	0.075	0.079		35.7503	0.552	0.551	0.563	0.121	0.122	0.122	0.115	0.117	0.117	0.12	0.12	0.128	0.12	0.122	0.122
36.0003	0.219	0.233	0.235	0.737	0.987	0.707	1.503	1.512	1.535	1.445	1.434	1.46	1.439	1.418	1.429		36.0003	0.705	0.697	0.699	0.057	0.052	0.074	0.069	0.072	0.071	0.068	0.086	0.091	0.065	0.075	0.079		36.0003	0.553	0.551	0.565	0.121	0.121	0.122	0.115	0.118	0.117	0.12	0.12	0.128	0.119	0.123	0.123
36.2503	0.219	0.233	0.235	0.736	0.984	0.707	1.503	1.516	1.539	1.446	1.43	1.459	1.438	1.415	1.429		36.2503	0.705	0.694	0.695	0.057	0.053	0.075	0.069	0.074	0.071	0.068	0.086	0.091	0.066	0.075	0.079		36.2503	0.549	0.55	0.564	0.12	0.12	0.121	0.114	0.117	0.116	0.121	0.121	0.128	0.12	0.123	0.123
36.5003	0.219	0.233	0.235	0.735	0.984	0.706	1.501	1.516	1.539	1.445	1.428	1.457	1.436	1.411	1.425		36.5003	0.699	0.684	0.688	0.057	0.053	0.075	0.07	0.074	0.071	0.068	0.087	0.092	0.066	0.076	0.08		36.5003	0.547	0.551	0.565	0.121	0.121	0.122	0.115	0.117	0.116	0.121	0.121	0.128	0.12	0.123	0.123
36.7503	0.22	0.234	0.236	0.735	0.983	0.706	1.5	1.52	1.544	1.443	1.43	1.461	1.43	1.409	1.421		36.7503	0.696	0.677	0.683	0.057	0.053	0.075	0.07	0.075	0.072	0.068	0.087	0.091	0.067	0.077	0.079		36.7503	0.548	0.552	0.566	0.121	0.122	0.122	0.115	0.117	0.116	0.12	0.121	0.128	0.12	0.123	0.123
37.0003	0.22	0.234	0.236	0.733	0.982	0.704	1.503	1.521	1.544	1.446	1.432	1.462	1.437	1.414	1.426		37.0003	0.711	0.691	0.696	0.057	0.053	0.076	0.07	0.075	0.072	0.068	0.087	0.092	0.067	0.077	0.08		37.0003	0.55	0.552	0.565	0.122	0.122	0.123	0.115	0.117	0.116	0.121	0.121	0.128	0.12	0.123	0.123
37.2503	0.218	0.232	0.234	0.732	0.982	0.704	1.503	1.522	1.544	1.445	1.432	1.461	1.437	1.413	1.426		37.2503	0.704	0.687	0.69	0.057	0.053	0.076	0.07	0.075	0.072	0.068	0.087	0.092	0.067	0.076	0.08		37.2503	0.55	0.553	0.566	0.121	0.122	0.122	0.115	0.117	0.116	0.121	0.121	0.128	0.12	0.123	0.123
37.5003	0.219	0.232	0.235	0.731	0.981	0.702	1.505	1.521	1.544	1.45	1.434	1.465	1.442	1.414	1.428		37.5003	0.709	0.694	0.695	0.057	0.053	0.077	0.07	0.074	0.072	0.069	0.087	0.092	0.067	0.073	0.081		37.5003	0.55	0.553	0.567	0.121	0.122	0.123	0.115	0.117	0.116	0.121	0.122	0.129	0.12	0.124	0.124
37.7503	0.219	0.232	0.235	0.731	0.981	0.703	1.505	1.524	1.548	1.445	1.431	1.462	1.435	1.409	1.424		37.7503	0.693	0.678	0.686	0.057	0.053	0.077	0.07	0.075	0.072	0.069	0.088	0.092	0.068	0.078	0.08		37.7503	0.549	0.551	0.564	0.121	0.122	0.122	0.115	0.117	0.116	0.121	0.121	0.129	0.12	0.123	0.124
38.0003	0.218	0.231	0.234	0.73	0.98	0.7	1.514	1.527	1.55	1.456	1.439	1.468	1.451	1.423	1.43		38.0003	0.709	0.697	0.697	0.057	0.053	0.077	0.069	0.075	0.071	0.069	0.087	0.092	0.066	0.072	0.08		38.0003	0.551	0.552	0.566	0.121	0.121	0.122	0.115	0.117	0.116	0.122	0.122	0.129	0.12	0.124	0.124
38.2503	0.218	0.231	0.234	0.729	0.979	0.701	1.515	1.531	1.555	1.458	1.441	1.472	1.451	1.422	1.437		38.2503	0.702	0.691	0.693	0.057	0.053	0.078	0.068	0.075	0.072	0.069	0.087	0.092	0.067	0.076	0.081		38.2503	0.548	0.553	0.565	0.121	0.121	0.122	0.115	0.117	0.116	0.121	0.121	0.129	0.121	0.124	0.124
38.5003	0.217	0.23	0.233	0.726	0.978	0.699	1.526	1.531	1.553	1.462	1.447	1.478	1.46	1.43	1.44		38.5003	0.712	0.706	0.696	0.056	0.052	0.077	0.066	0.073	0.071	0.069	0.088	0.092	0.066	0.071	0.081		38.5003	0.548	0.553	0.568	0.121	0.122	0.123	0.115	0.117	0.116	0.121	0.122	0.129	0.12	0.124	0.124
38.7503	0.217	0.231	0.234	0.727	0.978	0.699	1.517	1.533	1.555	1.458	1.444	1.476	1.452	1.423	1.435		38.7503	0.704	0.687	0.688	0.056	0.052	0.077	0.066	0.074	0.071	0.07	0.088	0.093	0.067	0.076	0.081		38.7503	0.549	0.551	0.566	0.121	0.122	0.123	0.115	0.117	0.116	0.122	0.122	0.129	0.12	0.124	0.124
39.0003	0.217	0.232	0.234	0.726	0.978	0.698	1.512	1.532	1.557	1.454	1.44	1.474	1.444	1.417	1.432		39.0003	0.702	0.68	0.683	0.056	0.052	0.078	0.066	0.074	0.071	0.07	0.088	0.093	0.068	0.073	0.082		39.0003	0.549	0.553	0.566	0.122	0.122	0.122	0.115	0.117	0.116	0.121	0.122	0.129	0.121	0.125	0.124
39.2503	0.217	0.231	0.234	0.725	0.976	0.698	1.511	1.529	1.555	1.455	1.443	1.475	1.446	1.42	1.435		39.2503	0.7	0.687	0.689	0.056	0.052	0.078	0.067	0.075	0.071	0.07	0.088	0.093	0.068	0.077	0.082		39.2503	0.547	0.553	0.566	0.122	0.122	0.123	0.115	0.117	0.116	0.122	0.124	0.129	0.121	0.124	0.124
39.5003	0.217	0.231	0.234	0.725	0.976	0.698	1.512	1.529	1.554	1.454	1.442	1.475	1.448	1.418	1.433		39.5003	0.705	0.689	0.692	0.057	0.053	0.079	0.067	0.074	0.072	0.07	0.088	0.093	0.069	0.074	0.082		39.5003	0.547	0.554	0.566	0.122	0.121	0.122	0.115	0.117	0.116	0.122	0.122	0.129	0.121	0.124	0.124
39.7503	0.217	0.231	0.235	0.725	0.977	0.697	1.509	1.529	1.554	1.452	1.439	1.472	1.443	1.412	1.429		39.7503	0.695	0.676	0.683	0.058	0.054	0.08	0.068	0.075	0.071	0.071	0.089	0.094	0.068	0.074	0.081		39.7503	0.548	0.553	0.564	0.121	0.121	0.122	0.115	0.117	0.116	0.123	0.123	0.13	0.121	0.124	0.125
40.0003	0.217	0.232	0.235	0.722	0.972	0.698	1.509	1.53	1.557	1.453	1.44	1.474	1.443	1.415	1.431		40.0003	0.69	0.674	0.68	0.057	0.053	0.078	0.068	0.075	0.072	0.071	0.088	0.094	0.07	0.074	0.08		40.0003	0.549	0.552	0.565	0.121	0.121	0.122	0.115	0.117	0.116	0.122	0.123	0.13	0.121	0.125	0.125
40.2503	0.217	0.231	0.235	0.722	0.973	0.696	1.509	1.523	1.55	1.449	1.434	1.468	1.439	1.406	1.426		40.2503	0.685	0.678	0.68	0.058	0.053	0.078	0.068	0.075	0.071	0.072	0.088	0.094	0.07	0.075	0.079		40.2503	0.549	0.554	0.566	0.122	0.122	0.122	0.115	0.117	0.116	0.123	0.123	0.13	0.121	0.125	0.125
40.5003	0.217	0.231	0.235	0.721	0.973	0.695	1.509	1.529	1.556	1.452	1.438	1.473	1.444	1.413	1.43		40.5003	0.699	0.676	0.684	0.058	0.054	0.078	0.069	0.076	0.072	0.07	0.087	0.093	0.07	0.075	0.083		40.5003	0.548	0.553	0.565	0.122	0.122	0.123	0.115	0.117	0.116	0.122	0.123	0.13	0.121	0.125	0.125
40.7503	0.216	0.231	0.234	0.72	0.97	0.695	1.514	1.529	1.552	1.456	1.442	1.475	1.449	1.418	1.432		40.7503	0.7	0.681	0.688	0.058	0.054	0.076	0.068	0.075	0.072	0.071	0.088	0.095	0.07	0.075	0.08		40.7503	0.547	0.555	0.567	0.122	0.122	0.123	0.115	0.117	0.117	0.122	0.123	0.13	0.121	0.124	0.125
41.0003	0.216	0.231	0.234	0.72	0.973	0.691	1.517	1.53	1.549	1.457	1.445	1.478	1.454	1.421	1.436		41.0003	0.7	0.685	0.686	0.058	0.054	0.077	0.068	0.075	0.072	0.071	0.088	0.095	0.069	0.075	0.08		41.0003	0.548	0.554	0.568	0.122	0.122	0.123	0.115	0.117	0.117	0.122	0.123	0.13	0.121	0.125	0.125
41.2503	0.216	0.231	0.234	0.718	0.972	0.692	1.52	1.536	1.555	1.46	1.448	1.483	1.456	1.423	1.438		41.2503	0.703	0.684	0.686	0.057	0.053	0.08	0.069	0.074	0.072	0.071	0.087	0.094	0.07	0.075	0.081		41.2503	0.546	0.555	0.567	0.122	0.122	0.123	0.115	0.117	0.117	0.122	0.123	0.13	0.121	0.125	0.125
41.5003	0.216	0.231	0.234	0.718	0.974	0.689	1.521	1.538	1.559	1.461	1.45	1.485	1.461	1.426	1.439		41.5003	0.701	0.682	0.684	0.057	0.053	0.081	0.068	0.075	0.072	0.071	0.088	0.094	0.07	0.076	0.08		41.5003	0.545	0.555	0.567	0.122	0.122	0.123	0.115	0.117	0.117	0.122	0.123	0.131	0.121	0.125	0.125
41.7503	0.217	0.231	0.235	0.718	0.971	0.691	1.519	1.539	1.559	1.455	1.446	1.482	1.453	1.419	1.436		41.7503	0.693	0.677	0.681	0.057	0.053	0.08	0.069	0.075	0.072	0.071	0.088	0.094	0.071	0.076	0.081		41.7503	0.545	0.556	0.568	0.122	0.123	0.123	0.116	0.117	0.116	0.122	0.123	0.131	0.121	0.125	0.125
42.0003	0.217	0.231	0.235	0.718	0.971	0.69	1.531	1.542	1.564	1.462	1.452	1.488	1.459	1.426	1.442		42.0003	0.703	0.683	0.686	0.057	0.053	0.081	0.069	0.076	0.073	0.072	0.088	0.094	0.071	0.081	0.081		42.0003	0.543	0.556	0.568	0.122	0.122	0.123	0.115	0.117	0.116	0.123	0.123	0.13	0.122	0.126	0.126
42.2503	0.218	0.232	0.235	0.716	0.969	0.689	1.532	1.535	1.559	1.46	1.45	1.488	1.457	1.424	1.44		42.2503	0.692	0.682	0.681	0.057	0.053	0.081	0.069	0.076	0.073	0.072	0.088	0.095	0.072	0.077	0.081		42.2503	0.543	0.556	0.566	0.122	0.122	0.123	0.115	0.117	0.117	0.124	0.123	0.131	0.122	0.126	0.126
42.5003	0.216	0.231	0.235	0.716	0.969	0.689	1.53	1.527	1.557	1.457	1.446	1.485	1.452	1.42	1.436		42.5003	0.686	0.674	0.675	0.057	0.053	0.081	0.069	0.077	0.073	0.072	0.089	0.095	0.073	0.078	0.082		42.5003	0.543	0.556	0.568	0.122	0.122	0.123	0.116	0.117	0.117	0.123	0.124	0.131	0.122	0.126	0.125
42.7503	0.217	0.231	0.235	0.715	0.968	0.688	1.532	1.53	1.561	1.454	1.443	1.481	1.449	1.416	1.432		42.7503	0.686	0.668	0.671	0.058	0.054	0.08	0.07	0.077	0.073	0.072	0.089	0.095	0.073	0.078	0.082		42.7503	0.544	0.556	0.567	0.122	0.122	0.123	0.115	0.117	0.117	0.124	0.124	0.131	0.122	0.125	0.126
43.0003	0.216	0.231	0.234	0.716	0.967	0.688	1.533	1.528	1.555	1.452	1.442	1.481	1.45	1.414	1.431		43.0003	0.691	0.671	0.677	0.058	0.054	0.08	0.07	0.076	0.073	0.073	0.089	0.096	0.075	0.08	0.085		43.0003	0.545	0.554	0.564	0.122	0.122	0.123	0.115	0.117	0.116	0.124	0.124	0.131	0.122	0.126	0.127
43.2503	0.217	0.232	0.235	0.713	0.964	0.688	1.544	1.531	1.56	1.463	1.451	1.49	1.465	1.425	1.44		43.2503	0.704	0.688	0.688	0.057	0.053	0.083	0.07	0.077	0.073	0.073	0.089	0.095	0.073	0.079	0.082		43.2503	0.544	0.556	0.567	0.122	0.123	0.124	0.115	0.117	0.117	0.124	0.125	0.132	0.122	0.125	0.127
43.5003	0.216	0.232	0.235	0.713	0.965	0.687	1.544	1.542	1.568	1.463	1.452	1.488	1.461	1.423	1.437		43.5003	0.693	0.672	0.676	0.057	0.053	0.082	0.07	0.076	0.073	0.073	0.09	0.096	0.074	0.079	0.083		43.5003	0.545	0.556	0.567	0.123	0.123	0.123	0.116	0.117	0.117	0.123	0.125	0.132	0.122	0.125	0.126
43.7503	0.215	0.231	0.234	0.712	0.965	0.686	1.547	1.542	1.569	1.466	1.454	1.49	1.469	1.428	1.441		43.7503	0.702	0.683	0.681	0.057	0.053	0.083	0.069	0.077	0.074	0.073	0.09	0.095	0.073	0.079	0.083		43.7503	0.543	0.554	0.567	0.122	0.122	0.123	0.115	0.117	0.117	0.123	0.124	0.132	0.122	0.126	0.127
44.0003	0.215	0.231	0.234	0.713	0.965	0.685	1.549	1.552	1.575	1.471	1.461	1.5	1.471	1.433	1.448		44.0003	0.699	0.681	0.681	0.057	0.053	0.083	0.07	0.076	0.073	0.074	0.09	0.097	0.074	0.08	0.083		44.0003	0.542	0.555	0.566	0.123	0.123	0.123	0.115	0.117	0.117	0.124	0.124	0.132	0.122	0.126	0.127
44.2503	0.214	0.231	0.234	0.712	0.965	0.684	1.546	1.546	1.568	1.464	1.454	1.494	1.471	1.429	1.446		44.2503	0.702	0.687	0.681	0.058	0.054	0.083	0.07	0.076	0.073	0.074	0.091	0.097	0.074	0.08	0.083		44.2503	0.546	0.554	0.567	0.123	0.123	0.123	0.115	0.117	0.117	0.123	0.124	0.131	0.122	0.125	0.126
44.5003	0.215	0.232	0.234	0.711	0.961	0.685	1.55	1.555	1.574	1.471	1.458	1.495	1.475	1.434	1.448		44.5003	0.703	0.685	0.68	0.058	0.054	0.081	0.069	0.076	0.074	0.074	0.091	0.096	0.075	0.08	0.084		44.5003	0.546	0.555	0.566	0.122	0.122	0.123	0.115	0.117	0.117	0.124	0.124	0.131	0.122	0.125	0.126
44.7503	0.214	0.231	0.234	0.711	0.962	0.685	1.55	1.555	1.573	1.473	1.461	1.5	1.478	1.435	1.45		44.7503	0.701	0.682	0.68	0.058	0.054	0.083	0.07	0.076	0.074	0.075	0.091	0.097	0.075	0.085	0.087		44.7503	0.544	0.553	0.566	0.122	0.122	0.123	0.115	0.117	0.117	0.126	0.124	0.131	0.123	0.127	0.127
45.0003	0.214	0.231	0.234	0.711	0.962	0.683	1.543	1.546	1.565	1.466	1.456	1.495	1.474	1.428	1.447		45.0003	0.687	0.676	0.671	0.058	0.054	0.083	0.069	0.076	0.073	0.075	0.091	0.098	0.075	0.081	0.085		45.0003	0.544	0.554	0.567	0.122	0.122	0.123	0.115	0.117	0.117	0.125	0.124	0.132	0.122	0.126	0.126
45.2503	0.214	0.231	0.234	0.711	0.961	0.683	1.54	1.543	1.562	1.465	1.454	1.494	1.471	1.427	1.446		45.2503	0.682	0.673	0.67	0.059	0.055	0.083	0.071	0.077	0.075	0.076	0.091	0.097	0.075	0.081	0.083		45.2503	0.543	0.555	0.568	0.123	0.122	0.123	0.115	0.118	0.117	0.124	0.125	0.132	0.123	0.127	0.127
45.5003	0.214	0.232	0.234	0.71	0.96	0.684	1.541	1.54	1.56	1.465	1.455	1.495	1.475	1.429	1.447		45.5003	0.69	0.675	0.672	0.059	0.054	0.083	0.071	0.078	0.074	0.075	0.091	0.098	0.077	0.082	0.084		45.5003	0.543	0.553	0.566	0.123	0.122	0.123	0.115	0.117	0.117	0.124	0.125	0.132	0.122	0.126	0.127
45.7503	0.214	0.231	0.234	0.709	0.958	0.683	1.548	1.547	1.565	1.475	1.459	1.501	1.485	1.438	1.453		45.7503	0.705	0.687	0.678	0.059	0.054	0.084	0.071	0.077	0.074	0.076	0.091	0.098	0.076	0.086	0.085		45.7503	0.543	0.555	0.567	0.123	0.123	0.124	0.115	0.117	0.117	0.124	0.125	0.133	0.122	0.126	0.128
46.0003	0.214	0.231	0.234	0.709	0.958	0.683	1.545	1.551	1.568	1.472	1.461	1.502	1.483	1.436	1.454		46.0003	0.695	0.674	0.673	0.059	0.055	0.085	0.07	0.077	0.074	0.077	0.091	0.097	0.077	0.083	0.086		46.0003	0.542	0.554	0.566	0.123	0.123	0.124	0.115	0.117	0.117	0.124	0.125	0.132	0.122	0.126	0.127
46.2503	0.214	0.231	0.234	0.709	0.958	0.682	1.541	1.545	1.561	1.471	1.455	1.496	1.481	1.432	1.449		46.2503	0.699	0.679	0.677	0.059	0.055	0.085	0.07	0.077	0.074	0.077	0.093	0.099	0.077	0.082	0.087		46.2503	0.542	0.556	0.567	0.123	0.123	0.124	0.115	0.117	0.117	0.125	0.125	0.132	0.122	0.126	0.126
46.5003	0.214	0.231	0.234	0.708	0.958	0.681	1.543	1.55	1.566	1.47	1.46	1.502	1.483	1.433	1.451		46.5003	0.689	0.672	0.671	0.059	0.055	0.084	0.071	0.076	0.075	0.077	0.093	0.099	0.075	0.084	0.085		46.5003	0.54	0.553	0.566	0.123	0.123	0.124	0.115	0.117	0.117	0.124	0.124	0.132	0.122	0.126	0.126
46.7503	0.214	0.232	0.234	0.707	0.957	0.682	1.541	1.546	1.561	1.471	1.456	1.495	1.485	1.434	1.447		46.7503	0.693	0.676	0.673	0.059	0.055	0.083	0.071	0.075	0.074	0.078	0.093	0.098	0.077	0.082	0.088		46.7503	0.541	0.552	0.564	0.122	0.123	0.124	0.115	0.118	0.117	0.124	0.124	0.132	0.123	0.127	0.127
47.0003	0.214	0.231	0.234	0.706	0.954	0.68	1.542	1.545	1.56	1.476	1.464	1.506	1.493	1.442	1.459		47.0003	0.691	0.69	0.675	0.058	0.054	0.084	0.069	0.077	0.074	0.077	0.092	0.098	0.076	0.082	0.085		47.0003	0.543	0.551	0.563	0.122	0.123	0.124	0.115	0.118	0.117	0.124	0.124	0.132	0.122	0.127	0.127
47.2503	0.214	0.231	0.234	0.707	0.956	0.68	1.542	1.547	1.562	1.475	1.464	1.507	1.492	1.439	1.459		47.2503	0.683	0.675	0.669	0.059	0.055	0.087	0.07	0.076	0.074	0.077	0.092	0.098	0.077	0.084	0.087		47.2503	0.541	0.553	0.565	0.122	0.123	0.124	0.115	0.118	0.117	0.125	0.125	0.132	0.123	0.126	0.126
47.5003	0.214	0.231	0.234	0.707	0.957	0.68	1.542	1.548	1.562	1.474	1.463	1.505	1.489	1.437	1.455		47.5003	0.69	0.668	0.667	0.059	0.055	0.086	0.07	0.075	0.074	0.078	0.093	0.1	0.078	0.084	0.089		47.5003	0.542	0.551	0.564	0.123	0.124	0.124	0.115	0.118	0.117	0.127	0.126	0.132	0.123	0.128	0.128
47.7503	0.213	0.231	0.233	0.706	0.955	0.679	1.546	1.547	1.561	1.478	1.462	1.504	1.499	1.442	1.459		47.7503	0.704	0.688	0.678	0.058	0.054	0.088	0.069	0.075	0.074	0.077	0.095	0.099	0.077	0.084	0.088		47.7503	0.542	0.548	0.562	0.123	0.123	0.124	0.115	0.117	0.116	0.126	0.127	0.132	0.123	0.127	0.127
48.0003	0.212	0.23	0.233	0.705	0.953	0.679	1.547	1.546	1.559	1.483	1.466	1.506	1.503	1.447	1.46		48.0003	0.702	0.688	0.675	0.058	0.054	0.087	0.07	0.074	0.074	0.078	0.092	0.098	0.077	0.084	0.086		48.0003	0.539	0.548	0.555	0.123	0.123	0.124	0.115	0.118	0.117	0.125	0.126	0.133	0.123	0.127	0.128
48.2503	0.212	0.23	0.232	0.706	0.956	0.677	1.545	1.551	1.563	1.476	1.463	1.509	1.496	1.439	1.46		48.2503	0.695	0.674	0.668	0.058	0.054	0.085	0.07	0.078	0.075	0.079	0.093	0.099	0.077	0.084	0.087		48.2503	0.541	0.548	0.558	0.123	0.124	0.125	0.116	0.118	0.117	0.125	0.126	0.133	0.123	0.128	0.128
48.5003	0.212	0.23	0.232	0.706	0.955	0.679	1.541	1.545	1.557	1.477	1.462	1.503	1.496	1.44	1.455		48.5003	0.695	0.676	0.671	0.059	0.055	0.086	0.07	0.078	0.075	0.078	0.093	0.098	0.078	0.086	0.089		48.5003	0.541	0.55	0.558	0.124	0.124	0.125	0.116	0.118	0.117	0.125	0.126	0.134	0.123	0.127	0.128
48.7503	0.211	0.23	0.232	0.706	0.955	0.678	1.54	1.543	1.555	1.475	1.463	1.506	1.497	1.438	1.458		48.7503	0.686	0.671	0.664	0.059	0.055	0.087	0.071	0.076	0.075	0.079	0.093	0.099	0.079	0.085	0.089		48.7503	0.54	0.55	0.559	0.123	0.123	0.125	0.116	0.118	0.117	0.125	0.126	0.133	0.123	0.127	0.128
49.0003	0.212	0.23	0.233	0.703	0.952	0.677	1.542	1.545	1.556	1.48	1.466	1.508	1.503	1.443	1.46		49.0003	0.694	0.676	0.668	0.058	0.054	0.086	0.071	0.076	0.075	0.079	0.093	0.099	0.079	0.086	0.088		49.0003	0.539	0.55	0.56	0.123	0.123	0.124	0.116	0.118	0.117	0.125	0.125	0.134	0.123	0.127	0.127
49.2503	0.213	0.23	0.233	0.704	0.952	0.678	1.543	1.545	1.555	1.484	1.469	1.513	1.508	1.45	1.466		49.2503	0.7	0.688	0.672	0.058	0.054	0.088	0.071	0.076	0.075	0.079	0.094	0.099	0.079	0.089	0.09		49.2503	0.538	0.547	0.559	0.123	0.124	0.125	0.116	0.118	0.117	0.125	0.125	0.133	0.123	0.127	0.128
49.5003	0.212	0.231	0.233	0.703	0.952	0.676	1.547	1.549	1.561	1.491	1.478	1.523	1.516	1.457	1.476		49.5003	0.697	0.687	0.667	0.058	0.054	0.087	0.07	0.076	0.075	0.08	0.093	0.099	0.079	0.088	0.09		49.5003	0.54	0.548	0.559	0.123	0.124	0.125	0.116	0.118	0.117	0.125	0.125	0.134	0.123	0.128	0.128
49.7503	0.212	0.23	0.233	0.704	0.953	0.676	1.536	1.544	1.553	1.483	1.47	1.513	1.511	1.448	1.468		49.7503	0.692	0.68	0.666	0.058	0.054	0.085	0.071	0.078	0.075	0.079	0.094	0.1	0.079	0.088	0.091		49.7503	0.54	0.546	0.559	0.123	0.124	0.125	0.116	0.118	0.117	0.126	0.125	0.133	0.123	0.127	0.128
50.0003	0.212	0.23	0.233	0.703	0.952	0.677	1.533	1.539	1.549	1.477	1.465	1.51	1.505	1.441	1.464		50.0003	0.689	0.678	0.664	0.059	0.055	0.087	0.071	0.077	0.076	0.08	0.094	0.101	0.078	0.087	0.09		50.0003	0.541	0.545	0.556	0.123	0.123	0.125	0.116	0.118	0.117	0.125	0.127	0.133	0.123	0.127	0.127
50.2503	0.212	0.23	0.233	0.703	0.952	0.676	1.533	1.54	1.551	1.481	1.47	1.514	1.504	1.445	1.465		50.2503	0.688	0.671	0.661	0.059	0.055	0.087	0.072	0.078	0.076	0.08	0.095	0.1	0.08	0.085	0.091		50.2503	0.54	0.545	0.557	0.123	0.123	0.124	0.116	0.118	0.117	0.126	0.126	0.134	0.124	0.128	0.128
50.5003	0.213	0.23	0.233	0.703	0.951	0.677	1.528	1.538	1.547	1.479	1.468	1.513	1.505	1.444	1.463		50.5003	0.68	0.664	0.659	0.059	0.056	0.087	0.072	0.077	0.076	0.082	0.095	0.101	0.081	0.09	0.091		50.5003	0.539	0.546	0.557	0.123	0.123	0.124	0.116	0.118	0.117	0.125	0.127	0.134	0.123	0.128	0.128
50.7503	0.212	0.23	0.232	0.702	0.95	0.676	1.525	1.534	1.541	1.478	1.464	1.509	1.504	1.443	1.462		50.7503	0.686	0.668	0.662	0.06	0.056	0.087	0.073	0.077	0.076	0.081	0.095	0.1	0.081	0.089	0.091		50.7503	0.539	0.545	0.559	0.124	0.124	0.125	0.117	0.118	0.117	0.126	0.126	0.134	0.124	0.128	0.128
51.0003	0.213	0.23	0.232	0.702	0.95	0.675	1.529	1.54	1.547	1.482	1.468	1.514	1.506	1.447	1.466		51.0003	0.693	0.674	0.662	0.061	0.056	0.087	0.073	0.077	0.076	0.081	0.097	0.1	0.08	0.084	0.091		51.0003	0.539	0.546	0.558	0.123	0.124	0.125	0.116	0.118	0.117	0.127	0.128	0.135	0.124	0.128	0.129
51.2503	0.213	0.23	0.233	0.703	0.95	0.675	1.53	1.542	1.548	1.487	1.479	1.521	1.51	1.451	1.472		51.2503	0.693	0.679	0.665	0.06	0.056	0.088	0.073	0.078	0.076	0.082	0.096	0.102	0.083	0.088	0.091		51.2503	0.538	0.544	0.557	0.124	0.124	0.125	0.117	0.118	0.117	0.126	0.127	0.135	0.124	0.128	0.129
51.5003	0.213	0.23	0.232	0.701	0.948	0.675	1.524	1.534	1.541	1.485	1.47	1.517	1.511	1.449	1.469		51.5003	0.691	0.676	0.664	0.06	0.056	0.089	0.074	0.078	0.077	0.083	0.095	0.101	0.083	0.084	0.091		51.5003	0.539	0.546	0.559	0.123	0.124	0.125	0.116	0.118	0.117	0.126	0.127	0.135	0.124	0.128	0.129
51.7503	0.213	0.231	0.233	0.7	0.947	0.676	1.527	1.539	1.546	1.493	1.479	1.525	1.516	1.458	1.477		51.7503	0.696	0.677	0.661	0.06	0.056	0.089	0.074	0.077	0.077	0.081	0.095	0.1	0.083	0.085	0.092		51.7503	0.539	0.547	0.559	0.124	0.124	0.125	0.117	0.119	0.117	0.126	0.127	0.135	0.124	0.129	0.13
52.0003	0.212	0.23	0.232	0.7	0.949	0.674	1.525	1.535	1.539	1.492	1.476	1.518	1.519	1.456	1.471		52.0003	0.696	0.681	0.662	0.059	0.055	0.09	0.074	0.077	0.077	0.082	0.097	0.102	0.084	0.084	0.092		52.0003	0.537	0.545	0.56	0.124	0.124	0.125	0.117	0.118	0.117	0.127	0.127	0.135	0.124	0.129	0.13
52.2503	0.212	0.229	0.232	0.7	0.949	0.674	1.523	1.535	1.541	1.49	1.477	1.524	1.523	1.458	1.477		52.2503	0.697	0.679	0.663	0.059	0.055	0.09	0.074	0.077	0.077	0.082	0.094	0.101	0.084	0.084	0.092		52.2503	0.537	0.546	0.558	0.123	0.124	0.125	0.117	0.118	0.117	0.127	0.126	0.135	0.124	0.128	0.129
52.5003	0.211	0.23	0.232	0.699	0.948	0.674	1.529	1.54	1.541	1.504	1.484	1.525	1.532	1.467	1.481		52.5003	0.703	0.697	0.662	0.058	0.055	0.087	0.071	0.076	0.076	0.082	0.096	0.101	0.082	0.088	0.092		52.5003	0.539	0.547	0.558	0.123	0.124	0.125	0.117	0.118	0.117	0.127	0.127	0.136	0.125	0.129	0.129
52.7503	0.212	0.231	0.233	0.7	0.948	0.673	1.514	1.532	1.537	1.496	1.484	1.531	1.528	1.461	1.482		52.7503	0.671	0.673	0.653	0.059	0.055	0.086	0.072	0.078	0.077	0.082	0.096	0.102	0.082	0.084	0.092		52.7503	0.54	0.547	0.557	0.124	0.124	0.125	0.117	0.118	0.117	0.127	0.128	0.136	0.124	0.129	0.129
53.0003	0.212	0.23	0.232	0.7	0.948	0.674	1.518	1.535	1.539	1.493	1.479	1.528	1.525	1.457	1.479		53.0003	0.689	0.673	0.655	0.059	0.056	0.087	0.072	0.077	0.076	0.082	0.096	0.102	0.081	0.083	0.091		53.0003	0.541	0.545	0.554	0.123	0.124	0.125	0.117	0.118	0.117	0.127	0.129	0.136	0.125	0.129	0.13
53.2503	0.212	0.23	0.232	0.7	0.946	0.674	1.515	1.525	1.528	1.481	1.465	1.511	1.518	1.446	1.465		53.2503	0.691	0.677	0.656	0.059	0.055	0.086	0.072	0.078	0.077	0.083	0.096	0.101	0.083	0.085	0.092		53.2503	0.541	0.547	0.554	0.124	0.124	0.126	0.117	0.119	0.117	0.126	0.129	0.136	0.125	0.13	0.13
53.5003	0.211	0.229	0.232	0.701	0.946	0.674	1.512	1.528	1.532	1.494	1.48	1.529	1.525	1.459	1.481		53.5003	0.68	0.671	0.653	0.06	0.056	0.088	0.073	0.077	0.077	0.082	0.097	0.102	0.083	0.084	0.092		53.5003	0.541	0.546	0.554	0.125	0.125	0.126	0.117	0.119	0.118	0.127	0.13	0.136	0.125	0.13	0.131
53.7503	0.21	0.23	0.231	0.699	0.945	0.675	1.508	1.522	1.524	1.488	1.47	1.515	1.517	1.446	1.464		53.7503	0.673	0.678	0.653	0.06	0.057	0.088	0.074	0.078	0.077	0.083	0.096	0.103	0.084	0.084	0.093		53.7503	0.543	0.547	0.556	0.124	0.125	0.126	0.117	0.119	0.118	0.128	0.127	0.136	0.124	0.129	0.13
54.0003	0.211	0.229	0.232	0.698	0.945	0.674	1.51	1.528	1.532	1.496	1.482	1.531	1.528	1.461	1.48		54.0003	0.687	0.673	0.657	0.06	0.057	0.09	0.074	0.078	0.078	0.083	0.096	0.102	0.085	0.084	0.093		54.0003	0.541	0.546	0.555	0.124	0.125	0.126	0.117	0.119	0.118	0.127	0.128	0.136	0.125	0.131	0.132
54.2503	0.211	0.229	0.232	0.698	0.945	0.674	1.51	1.528	1.531	1.496	1.483	1.533	1.529	1.46	1.482		54.2503	0.687	0.668	0.654	0.06	0.057	0.091	0.074	0.078	0.077	0.083	0.096	0.102	0.085	0.085	0.092		54.2503	0.542	0.546	0.555	0.124	0.124	0.125	0.118	0.119	0.118	0.128	0.128	0.137	0.125	0.13	0.13
54.5003	0.21	0.229	0.232	0.697	0.944	0.672	1.51	1.527	1.528	1.496	1.479	1.526	1.533	1.462	1.48		54.5003	0.695	0.679	0.658	0.058	0.055	0.091	0.074	0.078	0.078	0.084	0.099	0.102	0.087	0.086	0.093		54.5003	0.543	0.545	0.554	0.124	0.124	0.125	0.118	0.118	0.117	0.127	0.127	0.136	0.125	0.129	0.13
54.7503	0.211	0.23	0.232	0.697	0.944	0.674	1.509	1.528	1.53	1.496	1.484	1.534	1.533	1.461	1.484		54.7503	0.689	0.676	0.654	0.059	0.055	0.09	0.074	0.078	0.078	0.085	0.098	0.103	0.086	0.086	0.093		54.7503	0.543	0.545	0.554	0.124	0.124	0.126	0.118	0.118	0.117	0.128	0.128	0.136	0.125	0.13	0.13
55.0003	0.211	0.229	0.232	0.697	0.946	0.673	1.509	1.527	1.53	1.503	1.49	1.54	1.54	1.471	1.492		55.0003	0.693	0.678	0.652	0.06	0.056	0.091	0.074	0.078	0.078	0.085	0.097	0.102	0.086	0.086	0.093		55.0003	0.542	0.543	0.554	0.125	0.125	0.126	0.118	0.119	0.118	0.128	0.128	0.136	0.126	0.13	0.131
55.2503	0.21	0.23	0.232	0.696	0.944	0.673	1.502	1.524	1.526	1.499	1.486	1.535	1.536	1.466	1.485		55.2503	0.687	0.669	0.649	0.059	0.055	0.09	0.075	0.079	0.078	0.085	0.1	0.103	0.087	0.087	0.093		55.2503	0.54	0.544	0.553	0.124	0.124	0.125	0.118	0.118	0.117	0.128	0.128	0.137	0.126	0.13	0.131
55.5003	0.21	0.229	0.232	0.695	0.942	0.674	1.498	1.522	1.524	1.493	1.481	1.532	1.535	1.461	1.485		55.5003	0.679	0.669	0.647	0.059	0.056	0.092	0.075	0.079	0.079	0.085	0.1	0.103	0.086	0.087	0.094		55.5003	0.539	0.543	0.553	0.124	0.124	0.125	0.118	0.118	0.117	0.128	0.129	0.137	0.125	0.13	0.131
55.7503	0.21	0.23	0.232	0.697	0.942	0.674	1.495	1.521	1.523	1.491	1.479	1.531	1.533	1.458	1.482		55.7503	0.683	0.667	0.65	0.06	0.057	0.089	0.076	0.079	0.078	0.085	0.097	0.103	0.087	0.089	0.094		55.7503	0.541	0.543	0.553	0.125	0.125	0.126	0.118	0.119	0.118	0.129	0.129	0.137	0.126	0.131	0.131
56.0003	0.208	0.229	0.231	0.696	0.941	0.674	1.502	1.524	1.527	1.501	1.487	1.539	1.542	1.468	1.491		56.0003	0.685	0.67	0.649	0.06	0.056	0.089	0.076	0.079	0.078	0.084	0.097	0.103	0.088	0.087	0.094		56.0003	0.539	0.538	0.548	0.126	0.125	0.126	0.119	0.119	0.118	0.129	0.129	0.137	0.126	0.131	0.131
56.2503	0.209	0.229	0.232	0.695	0.942	0.673	1.498	1.523	1.525	1.499	1.487	1.54	1.542	1.464	1.489		56.2503	0.675	0.663	0.645	0.06	0.056	0.089	0.076	0.079	0.078	0.085	0.098	0.103	0.088	0.087	0.095		56.2503	0.54	0.539	0.549	0.125	0.125	0.126	0.118	0.119	0.118	0.128	0.13	0.138	0.126	0.13	0.132
56.5003	0.207	0.228	0.231	0.695	0.939	0.674	1.495	1.518	1.518	1.502	1.488	1.54	1.544	1.469	1.491		56.5003	0.672	0.681	0.642	0.06	0.057	0.09	0.076	0.079	0.079	0.086	0.098	0.103	0.089	0.089	0.095		56.5003	0.539	0.54	0.549	0.125	0.125	0.126	0.118	0.118	0.118	0.128	0.129	0.138	0.126	0.131	0.132
56.7503	0.207	0.228	0.23	0.695	0.942	0.673	1.491	1.517	1.515	1.503	1.486	1.536	1.543	1.468	1.487		56.7503	0.668	0.677	0.641	0.06	0.057	0.09	0.077	0.079	0.079	0.086	0.098	0.104	0.09	0.087	0.095		56.7503	0.542	0.541	0.551	0.125	0.125	0.126	0.118	0.118	0.118	0.128	0.129	0.138	0.126	0.132	0.131
57.0003	0.207	0.228	0.231	0.695	0.943	0.673	1.497	1.525	1.525	1.511	1.498	1.548	1.553	1.476	1.496		57.0003	0.676	0.665	0.643	0.06	0.057	0.093	0.077	0.079	0.079	0.086	0.098	0.104	0.091	0.089	0.095		57.0003	0.543	0.541	0.552	0.125	0.125	0.126	0.118	0.119	0.118	0.127	0.129	0.137	0.126	0.131	0.131
57.2503	0.21	0.23	0.232	0.696	0.942	0.674	1.498	1.525	1.525	1.514	1.5	1.553	1.555	1.481	1.502		57.2503	0.684	0.67	0.644	0.06	0.057	0.092	0.077	0.081	0.079	0.086	0.098	0.104	0.092	0.092	0.095		57.2503	0.542	0.541	0.551	0.124	0.124	0.125	0.119	0.119	0.118	0.128	0.129	0.138	0.126	0.131	0.132
57.5003	0.208	0.23	0.232	0.695	0.939	0.676	1.49	1.518	1.518	1.504	1.489	1.543	1.552	1.474	1.496		57.5003	0.689	0.675	0.645	0.061	0.057	0.094	0.077	0.08	0.078	0.085	0.098	0.103	0.091	0.09	0.096		57.5003	0.544	0.542	0.553	0.125	0.125	0.126	0.118	0.119	0.118	0.13	0.13	0.138	0.126	0.131	0.13
57.7503	0.207	0.228	0.231	0.695	0.941	0.674	1.489	1.523	1.521	1.507	1.494	1.548	1.553	1.475	1.498		57.7503	0.679	0.669	0.639	0.061	0.057	0.095	0.077	0.08	0.079	0.087	0.098	0.104	0.089	0.089	0.095		57.7503	0.542	0.542	0.552	0.125	0.125	0.126	0.119	0.119	0.118	0.128	0.129	0.137	0.126	0.131	0.131
58.0003	0.207	0.228	0.231	0.694	0.941	0.674	1.483	1.517	1.516	1.5	1.485	1.539	1.55	1.47	1.494		58.0003	0.678	0.672	0.639	0.061	0.057	0.093	0.078	0.08	0.079	0.086	0.099	0.104	0.088	0.089	0.095		58.0003	0.543	0.541	0.552	0.124	0.125	0.126	0.118	0.119	0.117	0.129	0.13	0.138	0.126	0.131	0.131
58.2503	0.206	0.229	0.231	0.695	0.941	0.674	1.482	1.517	1.518	1.506	1.493	1.548	1.553	1.474	1.498		58.2503	0.665	0.661	0.628	0.061	0.058	0.093	0.077	0.079	0.079	0.087	0.099	0.105	0.09	0.089	0.096		58.2503	0.543	0.542	0.552	0.124	0.125	0.126	0.118	0.118	0.118	0.129	0.13	0.138	0.126	0.132	0.132
58.5003	0.206	0.228	0.231	0.694	0.939	0.674	1.486	1.52	1.518	1.51	1.493	1.549	1.557	1.475	1.501		58.5003	0.671	0.671	0.632	0.061	0.058	0.093	0.078	0.082	0.079	0.085	0.099	0.103	0.089	0.091	0.095		58.5003	0.545	0.543	0.555	0.125	0.126	0.127	0.119	0.119	0.118	0.13	0.131	0.139	0.127	0.132	0.133
58.7503	0.205	0.228	0.23	0.694	0.939	0.675	1.489	1.522	1.519	1.52	1.502	1.553	1.566	1.487	1.506		58.7503	0.689	0.683	0.644	0.059	0.056	0.095	0.076	0.079	0.079	0.086	0.099	0.105	0.093	0.093	0.096		58.7503	0.546	0.542	0.554	0.125	0.126	0.127	0.119	0.118	0.118	0.129	0.13	0.138	0.126	0.131	0.132
59.0003	0.205	0.228	0.23	0.694	0.94	0.674	1.483	1.523	1.521	1.52	1.506	1.561	1.568	1.49	1.511		59.0003	0.679	0.672	0.638	0.059	0.056	0.095	0.078	0.08	0.08	0.087	0.099	0.105	0.093	0.091	0.097		59.0003	0.545	0.543	0.555	0.125	0.126	0.127	0.119	0.119	0.118	0.129	0.13	0.139	0.127	0.131	0.131
59.2503	0.205	0.228	0.23	0.693	0.939	0.674	1.487	1.524	1.521	1.52	1.5	1.552	1.571	1.488	1.506		59.2503	0.695	0.687	0.646	0.059	0.056	0.096	0.076	0.079	0.079	0.087	0.1	0.105	0.093	0.095	0.097		59.2503	0.546	0.54	0.553	0.124	0.124	0.126	0.119	0.119	0.118	0.13	0.131	0.139	0.127	0.134	0.134
59.5003	0.205	0.228	0.23	0.694	0.94	0.674	1.486	1.527	1.525	1.525	1.507	1.561	1.578	1.495	1.515		59.5003	0.681	0.678	0.637	0.059	0.056	0.095	0.076	0.079	0.079	0.086	0.099	0.104	0.093	0.092	0.097		59.5003	0.547	0.54	0.554	0.124	0.124	0.126	0.119	0.119	0.118	0.13	0.13	0.139	0.126	0.132	0.132
59.7503	0.205	0.227	0.23	0.695	0.941	0.674	1.482	1.526	1.525	1.524	1.509	1.563	1.577	1.493	1.515		59.7503	0.68	0.673	0.636	0.059	0.056	0.094	0.078	0.081	0.08	0.087	0.099	0.105	0.093	0.093	0.097		59.7503	0.543	0.54	0.553	0.125	0.125	0.126	0.119	0.119	0.118	0.13	0.13	0.139	0.127	0.133	0.134
60.0003	0.204	0.227	0.23	0.693	0.939	0.676	1.476	1.52	1.517	1.518	1.502	1.554	1.57	1.485	1.505		60.0003	0.673	0.679	0.638	0.06	0.057	0.095	0.077	0.08	0.079	0.088	0.1	0.105	0.093	0.096	0.097		60.0003	0.541	0.541	0.553	0.125	0.125	0.127	0.119	0.119	0.118	0.13	0.131	0.139	0.127	0.134	0.133
60.2503	0.204	0.227	0.23	0.694	0.94	0.676	1.477	1.523	1.521	1.519	1.504	1.56	1.574	1.489	1.513		60.2503	0.674	0.666	0.633	0.06	0.057	0.092	0.077	0.08	0.08	0.086	0.099	0.105	0.093	0.093	0.097		60.2503	0.54	0.541	0.553	0.124	0.125	0.126	0.119	0.119	0.118	0.13	0.131	0.14	0.127	0.132	0.132
60.5003	0.203	0.226	0.23	0.695	0.94	0.676	1.477	1.523	1.52	1.521	1.503	1.557	1.575	1.489	1.512		60.5003	0.687	0.679	0.637	0.06	0.057	0.092	0.077	0.081	0.08	0.087	0.099	0.105	0.092	0.095	0.097		60.5003	0.541	0.542	0.555	0.125	0.125	0.127	0.119	0.119	0.118	0.131	0.131	0.139	0.127	0.132	0.133
60.7503	0.203	0.227	0.23	0.694	0.94	0.677	1.48	1.524	1.519	1.523	1.501	1.553	1.578	1.49	1.509		60.7503	0.689	0.687	0.636	0.06	0.057	0.094	0.078	0.081	0.08	0.087	0.099	0.105	0.093	0.097	0.097		60.7503	0.542	0.542	0.555	0.125	0.125	0.127	0.119	0.119	0.118	0.13	0.131	0.14	0.127	0.133	0.133
61.0003	0.202	0.226	0.229	0.694	0.94	0.676	1.476	1.522	1.518	1.523	1.503	1.556	1.58	1.488	1.507		61.0003	0.678	0.676	0.63	0.06	0.057	0.09	0.077	0.081	0.08	0.088	0.101	0.106	0.092	0.093	0.098		61.0003	0.542	0.541	0.556	0.124	0.125	0.126	0.119	0.119	0.118	0.129	0.13	0.139	0.127	0.131	0.132
61.2503	0.202	0.226	0.229	0.694	0.939	0.678	1.465	1.52	1.517	1.52	1.505	1.561	1.578	1.492	1.514		61.2503	0.659	0.67	0.622	0.06	0.058	0.092	0.078	0.08	0.08	0.087	0.099	0.105	0.094	0.094	0.098		61.2503	0.541	0.541	0.557	0.125	0.125	0.127	0.119	0.119	0.118	0.129	0.131	0.14	0.127	0.133	0.134
61.5003	0.202	0.226	0.229	0.693	0.939	0.677	1.47	1.523	1.518	1.526	1.507	1.562	1.584	1.498	1.519		61.5003	0.682	0.676	0.632	0.06	0.057	0.092	0.078	0.08	0.08	0.087	0.1	0.106	0.094	0.095	0.098		61.5003	0.541	0.54	0.554	0.124	0.125	0.126	0.119	0.119	0.118	0.131	0.132	0.14	0.127	0.132	0.133
61.7503	0.202	0.226	0.228	0.692	0.938	0.677	1.468	1.524	1.521	1.526	1.511	1.567	1.584	1.496	1.52		61.7503	0.677	0.675	0.631	0.06	0.057	0.091	0.078	0.081	0.081	0.087	0.1	0.106	0.094	0.095	0.097		61.7503	0.541	0.54	0.555	0.125	0.126	0.127	0.119	0.119	0.118	0.13	0.131	0.14	0.127	0.133	0.133
62.0003	0.204	0.228	0.23	0.694	0.94	0.677	1.466	1.522	1.519	1.524	1.509	1.565	1.581	1.497	1.518		62.0003	0.683	0.672	0.632	0.06	0.057	0.094	0.079	0.082	0.081	0.088	0.1	0.106	0.095	0.095	0.098		62.0003	0.541	0.54	0.555	0.125	0.125	0.127	0.119	0.119	0.118	0.13	0.132	0.14	0.127	0.133	0.132
62.2503	0.203	0.227	0.23	0.694	0.939	0.678	1.466	1.525	1.522	1.528	1.512	1.567	1.58	1.497	1.519		62.2503	0.681	0.67	0.629	0.06	0.057	0.092	0.079	0.082	0.081	0.089	0.101	0.106	0.096	0.096	0.098		62.2503	0.541	0.54	0.556	0.125	0.126	0.127	0.119	0.119	0.118	0.131	0.132	0.14	0.127	0.134	0.133
62.5003	0.203	0.228	0.23	0.694	0.94	0.677	1.457	1.518	1.514	1.52	1.503	1.559	1.576	1.489	1.514		62.5003	0.664	0.674	0.625	0.061	0.058	0.094	0.08	0.082	0.081	0.089	0.1	0.106	0.096	0.097	0.098		62.5003	0.542	0.54	0.555	0.125	0.126	0.127	0.119	0.119	0.118	0.13	0.131	0.14	0.128	0.135	0.134
62.7503	0.202	0.226	0.229	0.694	0.939	0.678	1.463	1.523	1.52	1.527	1.512	1.569	1.581	1.497	1.521		62.7503	0.678	0.669	0.626	0.061	0.058	0.091	0.079	0.082	0.081	0.089	0.101	0.106	0.096	0.096	0.097		62.7503	0.543	0.539	0.556	0.124	0.126	0.127	0.119	0.119	0.118	0.132	0.132	0.14	0.127	0.134	0.133
63.0003	0.202	0.227	0.229	0.694	0.939	0.677	1.458	1.52	1.516	1.523	1.506	1.563	1.581	1.493	1.516		63.0003	0.678	0.666	0.626	0.061	0.058	0.093	0.08	0.082	0.081	0.089	0.1	0.106	0.096	0.099	0.098		63.0003	0.539	0.538	0.551	0.125	0.125	0.126	0.119	0.119	0.118	0.131	0.131	0.141	0.127	0.134	0.134
63.2503	0.202	0.227	0.229	0.695	0.938	0.679	1.45	1.515	1.512	1.522	1.507	1.565	1.577	1.49	1.514		63.2503	0.663	0.657	0.618	0.062	0.059	0.092	0.079	0.082	0.08	0.09	0.101	0.107	0.097	0.1	0.1		63.2503	0.54	0.539	0.552	0.125	0.125	0.127	0.119	0.119	0.118	0.13	0.131	0.14	0.127	0.132	0.132
63.5003	0.202	0.227	0.23	0.695	0.94	0.678	1.449	1.516	1.514	1.52	1.504	1.562	1.578	1.49	1.514		63.5003	0.675	0.655	0.625	0.066	0.059	0.092	0.08	0.082	0.081	0.09	0.101	0.107	0.098	0.101	0.099		63.5003	0.54	0.54	0.553	0.124	0.126	0.127	0.119	0.119	0.118	0.13	0.131	0.14	0.127	0.133	0.133
63.7503	0.201	0.227	0.23	0.694	0.938	0.678	1.45	1.516	1.512	1.525	1.508	1.566	1.581	1.494	1.518		63.7503	0.669	0.665	0.622	0.062	0.06	0.094	0.08	0.082	0.081	0.09	0.101	0.107	0.098	0.101	0.099		63.7503	0.541	0.541	0.554	0.125	0.126	0.128	0.119	0.119	0.118	0.13	0.133	0.141	0.127	0.135	0.134
64.0003	0.199	0.226	0.228	0.693	0.937	0.679	1.452	1.52	1.516	1.533	1.518	1.575	1.584	1.502	1.526		64.0003	0.66	0.665	0.618	0.063	0.06	0.096	0.081	0.083	0.081	0.091	0.101	0.107	0.1	0.1	0.1		64.0003	0.543	0.541	0.555	0.125	0.127	0.128	0.119	0.119	0.118	0.131	0.133	0.142	0.127	0.132	0.135
64.2503	0.2	0.226	0.229	0.693	0.935	0.68	1.453	1.519	1.514	1.528	1.51	1.568	1.588	1.5	1.523		64.2503	0.681	0.671	0.627	0.072	0.06	0.096	0.082	0.083	0.081	0.091	0.101	0.107	0.099	0.098	0.101		64.2503	0.542	0.54	0.555	0.124	0.126	0.127	0.119	0.12	0.118	0.131	0.132	0.141	0.127	0.134	0.134
64.5003	0.2	0.226	0.229	0.694	0.937	0.679	1.447	1.516	1.513	1.528	1.512	1.572	1.588	1.499	1.523		64.5003	0.673	0.658	0.623	0.063	0.06	0.099	0.082	0.083	0.081	0.091	0.102	0.107	0.1	0.1	0.1		64.5003	0.541	0.54	0.555	0.124	0.126	0.127	0.119	0.12	0.118	0.13	0.131	0.141	0.128	0.134	0.134
64.7503	0.2	0.227	0.229	0.694	0.938	0.678	1.45	1.519	1.515	1.532	1.516	1.575	1.59	1.504	1.527		64.7503	0.682	0.663	0.626	0.063	0.06	0.096	0.082	0.082	0.081	0.091	0.102	0.108	0.1	0.103	0.101		64.7503	0.54	0.541	0.556	0.124	0.126	0.127	0.119	0.12	0.118	0.131	0.132	0.141	0.128	0.134	0.136
65.0003	0.2	0.227	0.229	0.694	0.936	0.68	1.448	1.516	1.511	1.532	1.512	1.568	1.591	1.503	1.524		65.0003	0.682	0.67	0.626	0.064	0.06	0.098	0.083	0.082	0.081	0.092	0.102	0.108	0.101	0.102	0.101		65.0003	0.541	0.541	0.557	0.124	0.125	0.127	0.119	0.119	0.118	0.129	0.133	0.141	0.128	0.132	0.132
65.2503	0.201	0.229	0.229	0.695	0.937	0.68	1.452	1.521	1.516	1.536	1.519	1.577	1.599	1.508	1.532		65.2503	0.684	0.678	0.63	0.062	0.059	0.1	0.083	0.083	0.081	0.092	0.102	0.108	0.1	0.101	0.101		65.2503	0.539	0.541	0.558	0.126	0.126	0.127	0.12	0.12	0.118	0.131	0.132	0.141	0.129	0.133	0.132
65.5003	0.2	0.229	0.229	0.695	0.935	0.681	1.442	1.517	1.513	1.529	1.512	1.572	1.592	1.503	1.526		65.5003	0.681	0.665	0.625	0.062	0.06	0.095	0.081	0.082	0.081	0.091	0.102	0.108	0.098	0.1	0.101		65.5003	0.54	0.542	0.557	0.124	0.125	0.126	0.119	0.12	0.118	0.131	0.133	0.141	0.128	0.135	0.133
65.7503	0.199	0.228	0.229	0.696	0.936	0.681	1.441	1.516	1.512	1.532	1.515	1.574	1.594	1.505	1.527		65.7503	0.669	0.66	0.622	0.07	0.06	0.097	0.082	0.084	0.082	0.092	0.102	0.108	0.1	0.102	0.101		65.7503	0.539	0.54	0.557	0.125	0.126	0.127	0.12	0.12	0.118	0.131	0.133	0.141	0.13	0.136	0.133
66.0003	0.199	0.229	0.229	0.697	0.935	0.682	1.444	1.517	1.512	1.534	1.516	1.574	1.597	1.51	1.532		66.0003	0.682	0.669	0.627	0.063	0.06	0.094	0.082	0.084	0.082	0.092	0.102	0.108	0.1	0.105	0.102		66.0003	0.539	0.541	0.557	0.125	0.126	0.126	0.12	0.12	0.118	0.131	0.134	0.141	0.13	0.135	0.134
66.2503	0.198	0.228	0.228	0.695	0.936	0.68	1.441	1.513	1.507	1.53	1.512	1.57	1.594	1.501	1.523		66.2503	0.674	0.675	0.627	0.066	0.06	0.096	0.082	0.084	0.081	0.092	0.103	0.108	0.1	0.102	0.102		66.2503	0.541	0.54	0.556	0.124	0.126	0.126	0.119	0.12	0.118	0.131	0.132	0.141	0.13	0.137	0.135
66.5003	0.198	0.228	0.228	0.696	0.936	0.68	1.441	1.515	1.509	1.537	1.517	1.577	1.6	1.511	1.533		66.5003	0.668	0.677	0.62	0.068	0.06	0.092	0.082	0.083	0.082	0.092	0.103	0.108	0.1	0.101	0.102		66.5003	0.54	0.542	0.558	0.126	0.126	0.127	0.12	0.12	0.119	0.131	0.134	0.143	0.13	0.134	0.136
66.7503	0.199	0.228	0.228	0.696	0.935	0.682	1.44	1.516	1.512	1.539	1.524	1.583	1.601	1.515	1.537		66.7503	0.673	0.667	0.624	0.063	0.06	0.095	0.084	0.083	0.082	0.092	0.103	0.109	0.102	0.102	0.101		66.7503	0.54	0.542	0.559	0.125	0.127	0.127	0.12	0.12	0.119	0.131	0.132	0.142	0.131	0.133	0.135
67.0003	0.197	0.227	0.228	0.696	0.935	0.682	1.445	1.518	1.511	1.545	1.526	1.58	1.603	1.515	1.534		67.0003	0.685	0.677	0.628	0.065	0.06	0.094	0.083	0.083	0.082	0.092	0.103	0.109	0.101	0.106	0.1		67.0003	0.541	0.543	0.56	0.125	0.127	0.128	0.119	0.12	0.119	0.132	0.133	0.142	0.131	0.136	0.136
67.2503	0.197	0.228	0.228	0.697	0.935	0.682	1.446	1.52	1.513	1.547	1.526	1.581	1.609	1.519	1.538		67.2503	0.681	0.683	0.63	0.072	0.058	0.097	0.083	0.083	0.082	0.092	0.103	0.109	0.102	0.107	0.102		67.2503	0.541	0.542	0.561	0.125	0.127	0.127	0.12	0.12	0.119	0.133	0.132	0.142	0.13	0.134	0.135
67.5003	0.197	0.228	0.228	0.697	0.934	0.683	1.437	1.515	1.511	1.539	1.521	1.581	1.606	1.515	1.538		67.5003	0.66	0.673	0.622	0.063	0.059	0.097	0.084	0.084	0.082	0.092	0.104	0.109	0.103	0.104	0.102		67.5003	0.541	0.54	0.559	0.125	0.126	0.127	0.12	0.12	0.118	0.132	0.133	0.142	0.13	0.137	0.135
67.7503	0.196	0.227	0.227	0.698	0.937	0.683	1.438	1.517	1.512	1.543	1.523	1.584	1.609	1.519	1.541		67.7503	0.666	0.676	0.626	0.072	0.059	0.098	0.084	0.083	0.083	0.092	0.104	0.109	0.103	0.106	0.103		67.7503	0.541	0.542	0.56	0.125	0.125	0.127	0.12	0.12	0.118	0.132	0.134	0.143	0.129	0.137	0.134
68.0003	0.196	0.227	0.227	0.698	0.936	0.684	1.438	1.517	1.511	1.545	1.526	1.584	1.611	1.52	1.542		68.0003	0.672	0.674	0.624	0.073	0.059	0.098	0.084	0.084	0.083	0.093	0.104	0.11	0.103	0.105	0.102		68.0003	0.541	0.541	0.56	0.124	0.125	0.126	0.12	0.119	0.118	0.132	0.133	0.142	0.129	0.135	0.134
68.2503	0.196	0.227	0.227	0.699	0.936	0.685	1.433	1.514	1.51	1.542	1.525	1.585	1.609	1.519	1.544		68.2503	0.673	0.668	0.625	0.068	0.06	0.099	0.085	0.084	0.083	0.093	0.104	0.11	0.104	0.106	0.103		68.2503	0.543	0.541	0.56	0.125	0.125	0.126	0.12	0.12	0.118	0.133	0.134	0.142	0.13	0.135	0.135
68.5003	0.196	0.227	0.228	0.7	0.936	0.686	1.429	1.513	1.508	1.541	1.525	1.584	1.607	1.519	1.542		68.5003	0.65	0.66	0.613	0.067	0.06	0.096	0.084	0.084	0.083	0.094	0.104	0.11	0.104	0.108	0.104		68.5003	0.543	0.541	0.559	0.125	0.126	0.127	0.12	0.12	0.119	0.132	0.133	0.142	0.13	0.138	0.136
68.7503	0.194	0.226	0.226	0.7	0.937	0.685	1.433	1.513	1.507	1.544	1.525	1.585	1.611	1.521	1.545		68.7503	0.659	0.67	0.619	0.072	0.06	0.092	0.082	0.084	0.083	0.093	0.104	0.11	0.102	0.104	0.103		68.7503	0.538	0.54	0.559	0.125	0.126	0.127	0.12	0.12	0.119	0.132	0.134	0.142	0.13	0.135	0.134
69.0003	0.196	0.227	0.227	0.699	0.938	0.684	1.428	1.513	1.507	1.539	1.524	1.586	1.605	1.519	1.543		69.0003	0.665	0.662	0.619	0.07	0.061	0.095	0.084	0.085	0.083	0.094	0.105	0.11	0.104	0.106	0.103		69.0003	0.539	0.541	0.559	0.125	0.126	0.127	0.12	0.121	0.119	0.132	0.134	0.143	0.13	0.139	0.137
69.2503	0.196	0.227	0.228	0.699	0.937	0.684	1.436	1.515	1.51	1.545	1.53	1.589	1.608	1.525	1.548		69.2503	0.681	0.676	0.628	0.067	0.061	0.096	0.085	0.085	0.083	0.094	0.105	0.11	0.105	0.108	0.104		69.2503	0.541	0.541	0.561	0.124	0.126	0.127	0.119	0.12	0.119	0.131	0.133	0.143	0.13	0.134	0.136
69.5003	0.196	0.227	0.227	0.699	0.938	0.685	1.435	1.516	1.51	1.55	1.534	1.59	1.607	1.526	1.547		69.5003	0.676	0.674	0.626	0.068	0.061	0.098	0.086	0.085	0.083	0.094	0.105	0.11	0.107	0.11	0.104		69.5003	0.541	0.543	0.562	0.125	0.126	0.127	0.12	0.12	0.119	0.131	0.133	0.142	0.131	0.137	0.135
69.7503	0.196	0.227	0.227	0.699	0.939	0.686	1.434	1.517	1.512	1.549	1.534	1.594	1.606	1.526	1.549		69.7503	0.671	0.667	0.62	0.064	0.062	0.099	0.086	0.086	0.084	0.095	0.105	0.111	0.106	0.108	0.102		69.7503	0.539	0.542	0.561	0.125	0.125	0.126	0.12	0.121	0.119	0.132	0.133	0.143	0.131	0.138	0.136
70.0003	0.196	0.227	0.227	0.701	0.941	0.687	1.436	1.511	1.505	1.543	1.522	1.577	1.606	1.519	1.538		70.0003	0.674	0.683	0.624	0.074	0.061	0.103	0.088	0.086	0.084	0.095	0.105	0.111	0.108	0.111	0.103		70.0003	0.539	0.543	0.562	0.125	0.126	0.127	0.12	0.121	0.119	0.132	0.134	0.142	0.131	0.134	0.135
70.2503	0.196	0.227	0.227	0.699	0.938	0.687	1.433	1.514	1.509	1.551	1.532	1.589	1.611	1.529	1.549		70.2503	0.67	0.677	0.624	0.062	0.06	0.097	0.087	0.086	0.084	0.095	0.106	0.111	0.106	0.109	0.102		70.2503	0.538	0.543	0.563	0.125	0.126	0.127	0.12	0.12	0.119	0.133	0.135	0.143	0.131	0.135	0.135
70.5003	0.195	0.227	0.227	0.703	0.943	0.686	1.42	1.508	1.505	1.545	1.53	1.589	1.606	1.525	1.548		70.5003	0.653	0.658	0.617	0.065	0.062	0.098	0.086	0.086	0.084	0.095	0.105	0.111	0.108	0.111	0.104		70.5003	0.538	0.543	0.562	0.125	0.126	0.127	0.121	0.121	0.119	0.133	0.134	0.143	0.131	0.138	0.135
70.7503	0.195	0.227	0.228	0.704	0.942	0.687	1.425	1.508	1.504	1.542	1.526	1.586	1.605	1.523	1.547		70.7503	0.671	0.667	0.624	0.065	0.062	0.101	0.088	0.086	0.084	0.095	0.106	0.111	0.109	0.111	0.105		70.7503	0.539	0.544	0.563	0.125	0.126	0.127	0.12	0.121	0.119	0.133	0.134	0.142	0.131	0.134	0.135
71.0003	0.194	0.226	0.227	0.703	0.943	0.687	1.422	1.508	1.504	1.543	1.528	1.587	1.605	1.526	1.549		71.0003	0.67	0.661	0.621	0.065	0.062	0.097	0.087	0.086	0.084	0.095	0.106	0.111	0.108	0.109	0.104		71.0003	0.541	0.544	0.563	0.125	0.126	0.126	0.12	0.121	0.119	0.133	0.135	0.142	0.131	0.138	0.136
71.2503	0.193	0.226	0.227	0.703	0.942	0.689	1.418	1.505	1.502	1.546	1.531	1.59	1.605	1.525	1.549		71.2503	0.65	0.66	0.615	0.075	0.063	0.097	0.088	0.086	0.084	0.096	0.106	0.112	0.11	0.111	0.105		71.2503	0.54	0.544	0.562	0.125	0.126	0.127	0.12	0.121	0.119	0.133	0.135	0.143	0.131	0.135	0.135
71.5003	0.195	0.226	0.227	0.706	0.943	0.688	1.43	1.509	1.504	1.552	1.533	1.592	1.608	1.532	1.554		71.5003	0.677	0.677	0.625	0.065	0.063	0.097	0.088	0.086	0.084	0.096	0.106	0.112	0.108	0.109	0.104		71.5003	0.539	0.542	0.556	0.125	0.126	0.127	0.12	0.121	0.119	0.133	0.135	0.143	0.13	0.136	0.136
71.7503	0.193	0.226	0.226	0.703	0.941	0.687	1.423	1.502	1.498	1.541	1.522	1.58	1.602	1.522	1.542		71.7503	0.663	0.679	0.623	0.066	0.064	0.101	0.089	0.086	0.084	0.095	0.105	0.111	0.111	0.111	0.104		71.7503	0.539	0.544	0.557	0.125	0.127	0.128	0.12	0.12	0.119	0.133	0.135	0.143	0.131	0.136	0.137
72.0003	0.194	0.226	0.227	0.704	0.944	0.688	1.428	1.508	1.503	1.553	1.535	1.595	1.609	1.535	1.557		72.0003	0.667	0.676	0.622	0.066	0.063	0.102	0.09	0.087	0.084	0.096	0.106	0.111	0.111	0.113	0.104		72.0003	0.541	0.544	0.559	0.125	0.127	0.127	0.121	0.121	0.119	0.133	0.134	0.144	0.131	0.135	0.137
72.2503	0.195	0.227	0.228	0.705	0.945	0.688	1.425	1.509	1.505	1.554	1.538	1.598	1.608	1.535	1.557		72.2503	0.671	0.669	0.623	0.066	0.064	0.102	0.091	0.087	0.085	0.097	0.107	0.112	0.111	0.114	0.104		72.2503	0.541	0.544	0.56	0.126	0.127	0.127	0.121	0.121	0.12	0.134	0.134	0.144	0.132	0.137	0.137
72.5003	0.193	0.226	0.226	0.704	0.943	0.687	1.425	1.505	1.5	1.551	1.536	1.596	1.609	1.535	1.558		72.5003	0.673	0.673	0.621	0.065	0.063	0.102	0.09	0.086	0.084	0.096	0.106	0.112	0.111	0.112	0.104		72.5003	0.541	0.545	0.559	0.126	0.126	0.127	0.121	0.121	0.12	0.134	0.135	0.144	0.131	0.137	0.136
72.7503	0.193	0.226	0.226	0.707	0.946	0.69	1.427	1.504	1.499	1.553	1.535	1.595	1.609	1.537	1.558		72.7503	0.67	0.678	0.617	0.066	0.064	0.106	0.091	0.086	0.084	0.096	0.106	0.112	0.114	0.116	0.104		72.7503	0.541	0.543	0.558	0.126	0.126	0.127	0.121	0.121	0.12	0.134	0.135	0.143	0.131	0.139	0.136
73.0003	0.194	0.227	0.227	0.707	0.945	0.69	1.42	1.505	1.5	1.547	1.535	1.594	1.605	1.536	1.556		73.0003	0.668	0.667	0.617	0.066	0.064	0.104	0.091	0.087	0.085	0.097	0.107	0.113	0.112	0.113	0.103		73.0003	0.542	0.544	0.56	0.126	0.126	0.127	0.121	0.122	0.12	0.135	0.135	0.144	0.131	0.138	0.135
73.2503	0.192	0.225	0.225	0.708	0.948	0.688	1.417	1.499	1.494	1.548	1.53	1.586	1.606	1.53	1.55		73.2503	0.66	0.667	0.612	0.066	0.064	0.104	0.091	0.086	0.084	0.096	0.106	0.112	0.113	0.115	0.104		73.2503	0.543	0.544	0.555	0.125	0.126	0.127	0.121	0.121	0.119	0.134	0.135	0.144	0.131	0.135	0.135
73.5003	0.191	0.225	0.226	0.708	0.946	0.689	1.416	1.499	1.493	1.546	1.53	1.591	1.606	1.535	1.556		73.5003	0.66	0.667	0.614	0.068	0.065	0.105	0.089	0.087	0.084	0.096	0.107	0.112	0.112	0.115	0.105		73.5003	0.542	0.544	0.558	0.126	0.127	0.128	0.121	0.121	0.119	0.134	0.137	0.144	0.131	0.137	0.136
73.7503	0.191	0.225	0.225	0.707	0.945	0.689	1.424	1.497	1.49	1.553	1.531	1.588	1.608	1.534	1.553		73.7503	0.658	0.681	0.614	0.065	0.063	0.098	0.09	0.086	0.084	0.096	0.107	0.112	0.112	0.113	0.106		73.7503	0.543	0.545	0.56	0.125	0.127	0.128	0.121	0.121	0.12	0.134	0.136	0.144	0.131	0.14	0.139
74.0003	0.191	0.225	0.226	0.709	0.948	0.689	1.419	1.499	1.493	1.555	1.538	1.598	1.611	1.541	1.563		74.0003	0.643	0.666	0.607	0.066	0.064	0.101	0.09	0.086	0.084	0.096	0.107	0.112	0.113	0.114	0.106		74.0003	0.542	0.545	0.559	0.126	0.127	0.127	0.121	0.122	0.12	0.134	0.135	0.144	0.131	0.138	0.137
74.2503	0.19	0.224	0.225	0.706	0.945	0.689	1.427	1.503	1.495	1.563	1.545	1.604	1.618	1.548	1.57		74.2503	0.653	0.682	0.61	0.064	0.063	0.099	0.09	0.086	0.085	0.096	0.107	0.113	0.112	0.113	0.104		74.2503	0.543	0.545	0.559	0.125	0.126	0.127	0.121	0.121	0.121	0.134	0.136	0.144	0.131	0.139	0.137
74.5003	0.19	0.225	0.225	0.708	0.946	0.692	1.417	1.499	1.492	1.554	1.537	1.597	1.616	1.544	1.565		74.5003	0.66	0.669	0.613	0.065	0.064	0.103	0.091	0.087	0.084	0.097	0.108	0.113	0.113	0.115	0.104		74.5003	0.543	0.543	0.553	0.126	0.127	0.128	0.121	0.122	0.121	0.134	0.136	0.144	0.132	0.138	0.137
74.7503	0.192	0.226	0.226	0.708	0.946	0.69	1.417	1.499	1.493	1.554	1.537	1.598	1.612	1.545	1.566		74.7503	0.664	0.669	0.613	0.065	0.064	0.103	0.092	0.087	0.085	0.096	0.107	0.112	0.114	0.111	0.105		74.7503	0.543	0.545	0.555	0.126	0.126	0.128	0.122	0.122	0.121	0.135	0.136	0.145	0.132	0.139	0.137
75.0003	0.189	0.224	0.225	0.709	0.947	0.691	1.429	1.5	1.493	1.559	1.538	1.593	1.621	1.545	1.563		75.0003	0.663	0.689	0.616	0.063	0.061	0.107	0.093	0.087	0.085	0.097	0.108	0.113	0.116	0.113	0.108		75.0003	0.542	0.545	0.556	0.126	0.127	0.128	0.121	0.122	0.121	0.134	0.136	0.145	0.132	0.136	0.136
75.2503	0.191	0.225	0.226	0.708	0.945	0.692	1.42	1.5	1.494	1.56	1.544	1.605	1.621	1.55	1.571		75.2503	0.664	0.678	0.614	0.063	0.062	0.107	0.095	0.088	0.085	0.097	0.108	0.114	0.117	0.113	0.107		75.2503	0.543	0.546	0.558	0.126	0.127	0.128	0.121	0.121	0.119	0.134	0.135	0.145	0.132	0.138	0.137
75.5003	0.191	0.225	0.225	0.71	0.946	0.693	1.415	1.497	1.492	1.557	1.541	1.601	1.614	1.547	1.568		75.5003	0.66	0.669	0.612	0.064	0.062	0.103	0.094	0.087	0.085	0.097	0.108	0.113	0.116	0.112	0.107		75.5003	0.543	0.546	0.557	0.126	0.126	0.128	0.122	0.122	0.12	0.134	0.136	0.145	0.132	0.137	0.135
75.7503	0.191	0.224	0.225	0.711	0.947	0.694	1.423	1.494	1.486	1.56	1.538	1.592	1.618	1.543	1.561		75.7503	0.653	0.681	0.61	0.065	0.063	0.105	0.093	0.088	0.085	0.098	0.109	0.114	0.116	0.113	0.107		75.7503	0.541	0.542	0.553	0.125	0.125	0.126	0.121	0.122	0.12	0.134	0.135	0.145	0.132	0.138	0.137
76.0003	0.19	0.225	0.225	0.712	0.947	0.694	1.417	1.496	1.489	1.561	1.544	1.602	1.617	1.551	1.571		76.0003	0.644	0.671	0.604	0.065	0.063	0.101	0.093	0.088	0.086	0.098	0.109	0.114	0.115	0.112	0.108		76.0003	0.541	0.545	0.554	0.125	0.126	0.127	0.122	0.122	0.12	0.136	0.137	0.145	0.132	0.138	0.138
76.2503	0.19	0.225	0.225	0.713	0.949	0.695	1.42	1.49	1.484	1.548	1.529	1.585	1.618	1.538	1.558		76.2503	0.654	0.679	0.611	0.065	0.064	0.104	0.094	0.087	0.085	0.098	0.108	0.114	0.117	0.113	0.108		76.2503	0.541	0.545	0.555	0.125	0.127	0.127	0.121	0.121	0.121	0.135	0.137	0.145	0.132	0.136	0.137
76.5003	0.19	0.225	0.226	0.713	0.949	0.694	1.411	1.49	1.484	1.558	1.541	1.6	1.615	1.549	1.57		76.5003	0.646	0.67	0.609	0.065	0.063	0.099	0.093	0.088	0.086	0.098	0.109	0.114	0.116	0.113	0.109		76.5003	0.541	0.546	0.557	0.126	0.127	0.128	0.121	0.122	0.12	0.135	0.137	0.145	0.132	0.137	0.138
76.7503	0.188	0.223	0.224	0.713	0.948	0.695	1.414	1.489	1.483	1.56	1.541	1.6	1.617	1.551	1.572		76.7503	0.633	0.677	0.603	0.065	0.064	0.102	0.094	0.088	0.086	0.099	0.109	0.114	0.117	0.114	0.109		76.7503	0.542	0.546	0.556	0.126	0.127	0.128	0.122	0.122	0.121	0.135	0.137	0.146	0.132	0.138	0.139
77.0003	0.19	0.225	0.224	0.717	0.954	0.699	1.418	1.489	1.484	1.559	1.54	1.599	1.614	1.549	1.569		77.0003	0.648	0.675	0.607	0.066	0.064	0.105	0.096	0.088	0.086	0.099	0.109	0.115	0.12	0.114	0.109		77.0003	0.541	0.548	0.557	0.125	0.127	0.128	0.121	0.122	0.121	0.134	0.136	0.146	0.132	0.138	0.14
77.2503	0.191	0.226	0.225	0.717	0.955	0.698	1.417	1.491	1.486	1.564	1.546	1.606	1.612	1.554	1.575		77.2503	0.658	0.678	0.61	0.065	0.064	0.105	0.097	0.089	0.086	0.099	0.11	0.115	0.118	0.113	0.109		77.2503	0.543	0.548	0.557	0.126	0.126	0.127	0.121	0.122	0.121	0.135	0.137	0.146	0.132	0.139	0.138
77.5003	0.19	0.225	0.224	0.719	0.958	0.701	1.42	1.493	1.486	1.568	1.548	1.608	1.617	1.559	1.579		77.5003	0.655	0.68	0.608	0.066	0.064	0.104	0.095	0.089	0.086	0.099	0.109	0.115	0.117	0.113	0.108		77.5003	0.54	0.546	0.556	0.126	0.126	0.127	0.121	0.122	0.12	0.135	0.137	0.146	0.133	0.137	0.138
77.7503	0.189	0.225	0.224	0.719	0.957	0.7	1.411	1.489	1.483	1.563	1.545	1.606	1.617	1.557	1.58		77.7503	0.647	0.679	0.608	0.066	0.065	0.105	0.096	0.088	0.086	0.099	0.11	0.115	0.119	0.115	0.108		77.7503	0.52	0.547	0.554	0.126	0.126	0.127	0.122	0.122	0.121	0.135	0.137	0.146	0.133	0.137	0.137
78.0003	0.19	0.224	0.224	0.721	0.956	0.703	1.407	1.488	1.482	1.556	1.549	1.609	1.609	1.556	1.578		78.0003	0.629	0.672	0.6	0.067	0.066	0.108	0.098	0.089	0.087	0.1	0.11	0.115	0.12	0.114	0.109		78.0003	0.528	0.548	0.553	0.126	0.126	0.127	0.123	0.123	0.121	0.135	0.137	0.146	0.134	0.141	0.138
78.2503	0.189	0.225	0.225	0.721	0.958	0.702	1.405	1.484	1.478	1.559	1.54	1.6	1.61	1.552	1.572		78.2503	0.651	0.671	0.608	0.067	0.066	0.107	0.097	0.089	0.087	0.1	0.11	0.115	0.118	0.114	0.107		78.2503	0.525	0.549	0.552	0.126	0.126	0.127	0.123	0.123	0.121	0.136	0.136	0.145	0.134	0.139	0.136
78.5003	0.189	0.225	0.225	0.721	0.957	0.703	1.405	1.486	1.48	1.562	1.545	1.607	1.612	1.555	1.577		78.5003	0.65	0.669	0.606	0.067	0.066	0.104	0.096	0.089	0.087	0.1	0.11	0.115	0.117	0.113	0.106		78.5003	0.522	0.549	0.554	0.126	0.127	0.128	0.124	0.123	0.121	0.136	0.137	0.145	0.134	0.141	0.136
78.7503	0.187	0.224	0.224	0.723	0.959	0.703	1.414	1.482	1.476	1.559	1.536	1.593	1.618	1.55	1.569		78.7503	0.645	0.681	0.606	0.066	0.065	0.108	0.097	0.089	0.087	0.1	0.11	0.115	0.12	0.115	0.108		78.7503	0.522	0.549	0.555	0.126	0.126	0.127	0.124	0.122	0.121	0.136	0.138	0.146	0.134	0.139	0.137
79.0003	0.189	0.224	0.224	0.723	0.96	0.705	1.408	1.485	1.478	1.564	1.547	1.608	1.615	1.561	1.581		79.0003	0.646	0.676	0.608	0.067	0.066	0.107	0.098	0.089	0.087	0.1	0.11	0.115	0.118	0.114	0.107		79.0003	0.521	0.549	0.556	0.126	0.126	0.127	0.124	0.123	0.121	0.135	0.137	0.146	0.133	0.141	0.138
79.2503	0.189	0.224	0.224	0.723	0.959	0.704	1.409	1.478	1.472	1.559	1.54	1.601	1.608	1.552	1.573		79.2503	0.631	0.681	0.606	0.066	0.066	0.107	0.098	0.09	0.087	0.1	0.111	0.116	0.12	0.115	0.107		79.2503	0.521	0.548	0.555	0.126	0.126	0.127	0.125	0.123	0.122	0.136	0.138	0.147	0.134	0.137	0.139
79.5003	0.188	0.224	0.224	0.725	0.96	0.704	1.422	1.484	1.477	1.568	1.548	1.607	1.619	1.563	1.583		79.5003	0.645	0.687	0.61	0.066	0.066	0.109	0.1	0.09	0.087	0.099	0.11	0.115	0.121	0.114	0.107		79.5003	0.522	0.547	0.552	0.125	0.126	0.127	0.123	0.123	0.121	0.136	0.138	0.146	0.133	0.137	0.138
79.7503	0.188	0.224	0.224	0.725	0.961	0.705	1.418	1.482	1.475	1.567	1.548	1.609	1.617	1.563	1.584		79.7503	0.633	0.684	0.609	0.067	0.066	0.111	0.101	0.09	0.087	0.1	0.111	0.116	0.122	0.116	0.107		79.7503	0.52	0.548	0.553	0.126	0.126	0.127	0.123	0.122	0.121	0.136	0.137	0.147	0.133	0.136	0.137
80.0003	0.188	0.224	0.224	0.725	0.96	0.706	1.409	1.479	1.473	1.562	1.543	1.608	1.613	1.558	1.58		80.0003	0.634	0.668	0.604	0.067	0.067	0.109	0.1	0.09	0.088	0.101	0.111	0.117	0.12	0.115	0.107		80.0003	0.516	0.547	0.552	0.125	0.126	0.126	0.122	0.123	0.121	0.135	0.136	0.146	0.134	0.137	0.138
80.2503	0.188	0.224	0.225	0.727	0.963	0.706	1.425	1.484	1.477	1.575	1.555	1.614	1.619	1.567	1.589		80.2503	0.646	0.689	0.609	0.067	0.067	0.11	0.103	0.091	0.088	0.101	0.111	0.117	0.12	0.115	0.108		80.2503	0.517	0.549	0.554	0.126	0.127	0.127	0.122	0.123	0.121	0.136	0.137	0.147	0.134	0.138	0.137
80.5003	0.187	0.223	0.223	0.725	0.961	0.707	1.416	1.478	1.472	1.564	1.545	1.607	1.617	1.561	1.581		80.5003	0.638	0.68	0.608	0.068	0.067	0.112	0.103	0.091	0.088	0.101	0.111	0.117	0.12	0.116	0.108		80.5003	0.518	0.55	0.556	0.126	0.126	0.127	0.122	0.123	0.121	0.136	0.137	0.147	0.134	0.137	0.137
80.7503	0.187	0.224	0.224	0.727	0.962	0.707	1.408	1.475	1.469	1.563	1.542	1.603	1.614	1.56	1.58		80.7503	0.642	0.672	0.609	0.068	0.068	0.111	0.103	0.091	0.088	0.102	0.112	0.117	0.121	0.116	0.108		80.7503	0.518	0.546	0.555	0.126	0.126	0.126	0.122	0.124	0.121	0.136	0.137	0.147	0.134	0.137	0.138
81.0003	0.186	0.223	0.224	0.727	0.961	0.709	1.399	1.473	1.466	1.562	1.545	1.607	1.61	1.563	1.585		81.0003	0.622	0.668	0.602	0.069	0.068	0.108	0.103	0.091	0.088	0.102	0.111	0.117	0.12	0.115	0.108		81.0003	0.517	0.548	0.556	0.126	0.126	0.127	0.122	0.123	0.122	0.137	0.137	0.146	0.134	0.137	0.137
81.2503	0.186	0.223	0.224	0.729	0.964	0.707	1.402	1.474	1.468	1.562	1.546	1.608	1.612	1.564	1.586		81.2503	0.643	0.673	0.609	0.069	0.069	0.108	0.103	0.091	0.089	0.102	0.112	0.118	0.118	0.115	0.109		81.2503	0.518	0.549	0.557	0.127	0.127	0.127	0.123	0.124	0.122	0.137	0.138	0.147	0.135	0.14	0.138
81.5003	0.186	0.223	0.224	0.729	0.965	0.707	1.412	1.476	1.469	1.57	1.554	1.615	1.619	1.571	1.592		81.5003	0.637	0.689	0.606	0.068	0.068	0.109	0.103	0.091	0.088	0.102	0.112	0.118	0.119	0.115	0.109		81.5003	0.516	0.55	0.557	0.126	0.126	0.127	0.123	0.124	0.123	0.136	0.138	0.147	0.134	0.14	0.138
81.7503	0.184	0.223	0.223	0.729	0.963	0.709	1.408	1.481	1.473	1.574	1.56	1.621	1.627	1.579	1.599		81.7503	0.63	0.692	0.606	0.068	0.068	0.109	0.102	0.091	0.088	0.102	0.112	0.117	0.116	0.114	0.11		81.7503	0.516	0.549	0.557	0.126	0.127	0.127	0.123	0.124	0.122	0.136	0.138	0.147	0.134	0.139	0.14
82.0003	0.185	0.223	0.223	0.729	0.964	0.709	1.407	1.475	1.467	1.568	1.551	1.611	1.623	1.572	1.593		82.0003	0.629	0.683	0.604	0.068	0.068	0.113	0.103	0.091	0.089	0.101	0.111	0.117	0.117	0.114	0.11		82.0003	0.516	0.548	0.556	0.126	0.126	0.127	0.122	0.124	0.122	0.136	0.138	0.147	0.134	0.138	0.138
82.2503	0.187	0.223	0.224	0.729	0.963	0.71	1.404	1.478	1.47	1.571	1.555	1.616	1.62	1.577	1.598		82.2503	0.634	0.692	0.608	0.068	0.069	0.114	0.104	0.092	0.089	0.101	0.112	0.117	0.118	0.115	0.112		82.2503	0.517	0.549	0.556	0.126	0.127	0.127	0.123	0.125	0.123	0.136	0.138	0.147	0.135	0.14	0.138
82.5003	0.184	0.222	0.222	0.73	0.965	0.71	1.417	1.473	1.466	1.565	1.545	1.602	1.621	1.567	1.586		82.5003	0.629	0.692	0.605	0.067	0.068	0.115	0.105	0.092	0.089	0.102	0.113	0.118	0.118	0.115	0.11		82.5003	0.517	0.549	0.557	0.126	0.126	0.127	0.123	0.124	0.123	0.137	0.138	0.148	0.135	0.137	0.137
82.7503	0.185	0.223	0.223	0.73	0.965	0.712	1.411	1.476	1.468	1.568	1.552	1.615	1.618	1.576	1.595		82.7503	0.636	0.685	0.607	0.067	0.068	0.114	0.106	0.092	0.089	0.101	0.112	0.117	0.117	0.115	0.11		82.7503	0.521	0.549	0.557	0.126	0.127	0.127	0.123	0.125	0.122	0.137	0.138	0.147	0.134	0.138	0.137
83.0003	0.186	0.223	0.224	0.731	0.966	0.712	1.408	1.473	1.466	1.565	1.551	1.613	1.615	1.574	1.593		83.0003	0.639	0.681	0.609	0.068	0.068	0.114	0.106	0.092	0.089	0.102	0.113	0.118	0.116	0.115	0.11		83.0003	0.518	0.549	0.555	0.127	0.127	0.127	0.123	0.124	0.122	0.137	0.138	0.147	0.135	0.139	0.136
83.2503	0.185	0.223	0.223	0.731	0.965	0.714	1.396	1.47	1.463	1.559	1.55	1.613	1.61	1.573	1.594		83.2503	0.628	0.676	0.606	0.079	0.069	0.111	0.105	0.092	0.09	0.102	0.113	0.119	0.113	0.117	0.111		83.2503	0.517	0.546	0.555	0.126	0.126	0.127	0.123	0.124	0.122	0.137	0.139	0.147	0.134	0.139	0.138
83.5003	0.183	0.223	0.223	0.733	0.966	0.713	1.397	1.469	1.461	1.56	1.551	1.612	1.61	1.575	1.596		83.5003	0.637	0.681	0.61	0.079	0.069	0.109	0.105	0.092	0.089	0.103	0.114	0.119	0.112	0.114	0.111		83.5003	0.518	0.548	0.558	0.126	0.127	0.128	0.123	0.124	0.123	0.137	0.138	0.147	0.133	0.14	0.139
83.7503	0.184	0.223	0.224	0.734	0.967	0.714	1.396	1.47	1.462	1.561	1.557	1.62	1.616	1.579	1.6		83.7503	0.616	0.688	0.604	0.078	0.07	0.11	0.105	0.092	0.09	0.103	0.113	0.119	0.11	0.115	0.111		83.7503	0.517	0.548	0.558	0.126	0.127	0.127	0.123	0.124	0.123	0.137	0.139	0.148	0.132	0.138	0.138
84.0003	0.182	0.222	0.223	0.735	0.967	0.714	1.399	1.466	1.459	1.556	1.55	1.61	1.612	1.574	1.593		84.0003	0.63	0.681	0.609	0.081	0.071	0.112	0.106	0.093	0.09	0.103	0.114	0.119	0.11	0.115	0.111		84.0003	0.517	0.548	0.558	0.126	0.127	0.127	0.123	0.125	0.124	0.137	0.139	0.147	0.132	0.14	0.14
84.2503	0.183	0.223	0.223	0.735	0.966	0.715	1.391	1.466	1.458	1.555	1.554	1.616	1.612	1.577	1.597		84.2503	0.627	0.682	0.609	0.07	0.07	0.11	0.106	0.093	0.09	0.103	0.114	0.119	0.107	0.114	0.11		84.2503	0.518	0.549	0.557	0.126	0.126	0.127	0.123	0.125	0.123	0.137	0.139	0.149	0.133	0.138	0.138
84.5003	0.184	0.222	0.223	0.734	0.966	0.716	1.394	1.465	1.457	1.551	1.552	1.614	1.608	1.575	1.596		84.5003	0.617	0.677	0.605	0.08	0.071	0.111	0.107	0.093	0.09	0.104	0.114	0.119	0.108	0.116	0.111		84.5003	0.517	0.546	0.555	0.125	0.126	0.127	0.123	0.125	0.123	0.137	0.138	0.148	0.133	0.139	0.139
84.7503	0.185	0.223	0.224	0.734	0.966	0.716	1.39	1.464	1.456	1.548	1.551	1.614	1.605	1.574	1.595		84.7503	0.625	0.677	0.608	0.083	0.072	0.11	0.108	0.093	0.09	0.103	0.113	0.118	0.108	0.116	0.112		84.7503	0.517	0.545	0.551	0.126	0.127	0.127	0.123	0.125	0.124	0.136	0.138	0.148	0.134	0.137	0.138
85.0003	0.184	0.223	0.223	0.734	0.966	0.715	1.395	1.464	1.455	1.551	1.554	1.617	1.608	1.577	1.598		85.0003	0.622	0.684	0.608	0.072	0.071	0.11	0.107	0.093	0.09	0.103	0.114	0.119	0.106	0.115	0.111		85.0003	0.514	0.545	0.552	0.126	0.126	0.127	0.123	0.125	0.123	0.137	0.139	0.148	0.134	0.138	0.137
85.2503	0.183	0.222	0.223	0.734	0.966	0.716	1.401	1.467	1.457	1.56	1.557	1.618	1.617	1.583	1.603		85.2503	0.618	0.685	0.606	0.071	0.072	0.116	0.11	0.093	0.089	0.103	0.114	0.119	0.108	0.117	0.112		85.2503	0.514	0.546	0.554	0.127	0.127	0.128	0.124	0.125	0.124	0.138	0.138	0.148	0.134	0.139	0.139
85.5003	0.184	0.222	0.222	0.734	0.965	0.715	1.41	1.467	1.457	1.562	1.559	1.617	1.625	1.582	1.601		85.5003	0.609	0.699	0.604	0.079	0.07	0.113	0.109	0.093	0.09	0.103	0.114	0.119	0.107	0.115	0.112		85.5003	0.514	0.546	0.553	0.126	0.127	0.128	0.124	0.126	0.124	0.139	0.139	0.149	0.134	0.137	0.137
85.7503	0.184	0.222	0.223	0.735	0.965	0.716	1.394	1.465	1.454	1.553	1.555	1.618	1.619	1.583	1.602		85.7503	0.609	0.685	0.601	0.069	0.071	0.113	0.11	0.093	0.09	0.103	0.114	0.119	0.108	0.116	0.112		85.7503	0.512	0.545	0.551	0.127	0.127	0.127	0.124	0.127	0.123	0.138	0.139	0.149	0.134	0.139	0.137
86.0003	0.183	0.222	0.223	0.735	0.964	0.716	1.39	1.463	1.453	1.567	1.557	1.618	1.62	1.584	1.604		86.0003	0.619	0.691	0.606	0.069	0.069	0.106	0.106	0.093	0.09	0.103	0.114	0.12	0.108	0.114	0.112		86.0003	0.513	0.546	0.556	0.126	0.127	0.127	0.124	0.125	0.123	0.138	0.139	0.149	0.134	0.141	0.139
86.2503	0.183	0.222	0.222	0.738	0.966	0.718	1.391	1.461	1.451	1.573	1.551	1.609	1.615	1.578	1.598		86.2503	0.617	0.691	0.608	0.08	0.071	0.107	0.107	0.092	0.09	0.103	0.114	0.12	0.108	0.114	0.112		86.2503	0.513	0.546	0.556	0.127	0.127	0.128	0.124	0.126	0.123	0.138	0.139	0.149	0.134	0.137	0.137
86.5003	0.182	0.22	0.221	0.738	0.968	0.716	1.389	1.463	1.452	1.605	1.56	1.622	1.623	1.587	1.608		86.5003	0.606	0.691	0.603	0.074	0.07	0.106	0.107	0.093	0.09	0.103	0.114	0.119	0.108	0.114	0.111		86.5003	0.51	0.545	0.553	0.126	0.127	0.127	0.123	0.126	0.123	0.138	0.139	0.148	0.134	0.138	0.138
86.7503	0.184	0.222	0.223	0.739	0.966	0.718	1.386	1.462	1.451	1.563	1.558	1.62	1.615	1.585	1.606		86.7503	0.596	0.682	0.597	0.072	0.071	0.108	0.109	0.093	0.09	0.104	0.115	0.12	0.111	0.115	0.112		86.7503	0.51	0.546	0.554	0.126	0.127	0.127	0.123	0.125	0.123	0.138	0.139	0.149	0.134	0.139	0.138
87.0003	0.184	0.222	0.223	0.738	0.968	0.717	1.387	1.462	1.45	1.554	1.559	1.621	1.611	1.587	1.607		87.0003	0.599	0.687	0.6	0.075	0.072	0.112	0.111	0.093	0.09	0.104	0.115	0.12	0.111	0.116	0.113		87.0003	0.508	0.544	0.555	0.127	0.127	0.128	0.123	0.127	0.125	0.138	0.14	0.149	0.134	0.14	0.139
87.2503	0.184	0.221	0.222	0.737	0.967	0.719	1.386	1.46	1.451	1.554	1.557	1.621	1.608	1.585	1.608		87.2503	0.616	0.684	0.601	0.074	0.073	0.112	0.112	0.094	0.091	0.105	0.115	0.12	0.11	0.116	0.113		87.2503	0.511	0.545	0.555	0.126	0.127	0.128	0.123	0.126	0.124	0.138	0.14	0.15	0.134	0.138	0.14
87.5003	0.184	0.222	0.224	0.738	0.968	0.719	1.391	1.459	1.449	1.572	1.557	1.618	1.608	1.583	1.604		87.5003	0.624	0.688	0.606	0.075	0.073	0.112	0.112	0.094	0.091	0.105	0.115	0.121	0.109	0.117	0.113		87.5003	0.51	0.544	0.555	0.126	0.126	0.127	0.123	0.126	0.123	0.139	0.139	0.149	0.134	0.137	0.139
87.7503	0.186	0.223	0.224	0.739	0.968	0.719	1.406	1.46	1.45	1.563	1.555	1.611	1.612	1.58	1.599		87.7503	0.629	0.697	0.608	0.081	0.074	0.117	0.115	0.095	0.091	0.105	0.116	0.121	0.109	0.117	0.113		87.7503	0.511	0.543	0.557	0.126	0.127	0.128	0.123	0.126	0.124	0.138	0.14	0.15	0.134	0.138	0.14
88.0003	0.184	0.221	0.222	0.738	0.968	0.718	1.393	1.461	1.45	1.568	1.561	1.626	1.614	1.588	1.61		88.0003	0.615	0.691	0.602	0.071	0.074	0.117	0.114	0.095	0.091	0.105	0.116	0.121	0.109	0.118	0.113		88.0003	0.512	0.538	0.548	0.126	0.126	0.127	0.123	0.127	0.124	0.138	0.139	0.149	0.134	0.141	0.139
88.2503	0.184	0.222	0.222	0.739	0.968	0.718	1.382	1.455	1.445	1.547	1.554	1.619	1.604	1.582	1.605		88.2503	0.617	0.68	0.602	0.072	0.074	0.114	0.113	0.095	0.091	0.106	0.116	0.121	0.108	0.118	0.113		88.2503	0.51	0.537	0.548	0.126	0.126	0.127	0.123	0.127	0.124	0.139	0.14	0.15	0.134	0.141	0.14
88.5003	0.183	0.221	0.222	0.741	0.969	0.719	1.377	1.454	1.444	1.551	1.551	1.617	1.601	1.581	1.604		88.5003	0.622	0.678	0.601	0.071	0.074	0.111	0.112	0.095	0.091	0.105	0.115	0.121	0.108	0.117	0.113		88.5003	0.509	0.537	0.551	0.126	0.127	0.127	0.123	0.126	0.124	0.139	0.14	0.15	0.134	0.14	0.138
88.7503	0.181	0.221	0.222	0.741	0.97	0.72	1.372	1.453	1.443	1.54	1.553	1.623	1.602	1.581	1.606		88.7503	0.618	0.672	0.598	0.072	0.075	0.11	0.111	0.095	0.091	0.106	0.115	0.121	0.108	0.117	0.113		88.7503	0.509	0.539	0.552	0.126	0.127	0.128	0.123	0.127	0.125	0.138	0.139	0.149	0.134	0.14	0.139
89.0003	0.181	0.221	0.222	0.742	0.971	0.721	1.366	1.449	1.439	1.538	1.551	1.62	1.596	1.579	1.603		89.0003	0.613	0.67	0.597	0.073	0.076	0.11	0.112	0.095	0.091	0.106	0.116	0.121	0.111	0.118	0.114		89.0003	0.51	0.539	0.554	0.126	0.128	0.128	0.123	0.126	0.124	0.138	0.14	0.15	0.134	0.138	0.138
89.2503	0.18	0.22	0.222	0.742	0.971	0.72	1.373	1.449	1.439	1.535	1.551	1.616	1.598	1.578	1.603		89.2503	0.61	0.681	0.599	0.073	0.076	0.109	0.112	0.095	0.092	0.107	0.117	0.122	0.11	0.119	0.114		89.2503	0.509	0.539	0.554	0.126	0.127	0.127	0.122	0.125	0.124	0.139	0.141	0.15	0.134	0.139	0.138
89.5003	0.179	0.219	0.22	0.741	0.971	0.721	1.369	1.454	1.443	1.534	1.56	1.628	1.611	1.588	1.613		89.5003	0.608	0.692	0.6	0.074	0.077	0.109	0.111	0.095	0.092	0.106	0.116	0.121	0.11	0.119	0.114		89.5003	0.509	0.54	0.553	0.126	0.127	0.127	0.123	0.126	0.125	0.139	0.139	0.15	0.135	0.139	0.14
89.7503	0.18	0.221	0.222	0.74	0.971	0.721	1.36	1.453	1.442	1.566	1.558	1.625	1.608	1.59	1.613		89.7503	0.612	0.687	0.6	0.074	0.077	0.11	0.112	0.095	0.092	0.106	0.116	0.122	0.112	0.119	0.114		89.7503	0.51	0.541	0.553	0.126	0.127	0.128	0.123	0.126	0.124	0.139	0.14	0.15	0.134	0.139	0.139
90.0003	0.178	0.219	0.22	0.741	0.972	0.721	1.362	1.455	1.444	1.586	1.563	1.627	1.62	1.593	1.616		90.0003	0.606	0.7	0.6	0.084	0.077	0.113	0.113	0.096	0.092	0.105	0.116	0.121	0.113	0.119	0.114		90.0003	0.51	0.54	0.554	0.127	0.127	0.128	0.123	0.127	0.125	0.139	0.14	0.15	0.135	0.141	0.141
90.2503	0.179	0.22	0.221	0.74	0.97	0.72	1.361	1.453	1.44	1.582	1.559	1.624	1.613	1.589	1.612		90.2503	0.598	0.699	0.594	0.074	0.079	0.117	0.114	0.096	0.092	0.106	0.116	0.122	0.115	0.121	0.114		90.2503	0.507	0.54	0.554	0.126	0.127	0.128	0.123	0.127	0.125	0.139	0.14	0.15	0.134	0.139	0.14
90.5003	0.178	0.219	0.22	0.742	0.971	0.72	1.368	1.458	1.445	1.591	1.567	1.631	1.627	1.597	1.622		90.5003	0.592	0.704	0.592	0.073	0.077	0.118	0.114	0.095	0.092	0.105	0.116	0.121	0.115	0.12	0.114		90.5003	0.504	0.54	0.555	0.126	0.127	0.127	0.123	0.125	0.124	0.139	0.14	0.15	0.135	0.139	0.14
90.7503	0.178	0.22	0.221	0.743	0.97	0.722	1.365	1.456	1.443	1.59	1.563	1.627	1.621	1.595	1.619		90.7503	0.61	0.698	0.596	0.073	0.078	0.119	0.117	0.096	0.092	0.107	0.117	0.122	0.117	0.12	0.116		90.7503	0.503	0.54	0.555	0.126	0.127	0.127	0.123	0.127	0.124	0.14	0.14	0.15	0.135	0.139	0.138
91.0003	0.178	0.22	0.222	0.744	0.971	0.722	1.356	1.45	1.438	1.591	1.556	1.623	1.614	1.589	1.614		91.0003	0.614	0.69	0.596	0.074	0.078	0.117	0.115	0.096	0.092	0.107	0.117	0.122	0.117	0.12	0.115		91.0003	0.503	0.54	0.556	0.127	0.127	0.128	0.123	0.125	0.125	0.139	0.14	0.151	0.135	0.137	0.138
91.2503	0.177	0.219	0.221	0.744	0.972	0.722	1.353	1.451	1.439	1.593	1.56	1.628	1.615	1.593	1.619		91.2503	0.611	0.697	0.597	0.074	0.078	0.116	0.114	0.096	0.093	0.107	0.117	0.122	0.117	0.12	0.115		91.2503	0.502	0.541	0.557	0.126	0.127	0.128	0.123	0.126	0.124	0.14	0.141	0.151	0.134	0.142	0.139
91.5003	0.177	0.22	0.221	0.745	0.971	0.723	1.348	1.448	1.435	1.578	1.556	1.625	1.615	1.591	1.616		91.5003	0.608	0.692	0.592	0.075	0.079	0.111	0.113	0.096	0.093	0.105	0.115	0.121	0.118	0.12	0.115		91.5003	0.501	0.54	0.557	0.126	0.127	0.128	0.122	0.127	0.125	0.14	0.141	0.151	0.134	0.142	0.14
91.7503	0.176	0.218	0.22	0.746	0.973	0.724	1.355	1.449	1.437	1.575	1.558	1.625	1.615	1.591	1.616		91.7503	0.608	0.695	0.59	0.075	0.08	0.114	0.115	0.097	0.093	0.106	0.117	0.122	0.12	0.12	0.115		91.7503	0.5	0.541	0.558	0.126	0.128	0.128	0.122	0.127	0.124	0.14	0.141	0.151	0.135	0.14	0.14
92.0003	0.176	0.218	0.22	0.746	0.973	0.722	1.361	1.453	1.439	1.585	1.565	1.633	1.627	1.599	1.624		92.0003	0.601	0.705	0.59	0.075	0.08	0.113	0.113	0.096	0.093	0.106	0.116	0.122	0.118	0.121	0.116		92.0003	0.5	0.54	0.555	0.126	0.127	0.128	0.122	0.128	0.125	0.14	0.142	0.151	0.134	0.138	0.141
92.2503	0.176	0.219	0.22	0.745	0.973	0.723	1.353	1.449	1.436	1.576	1.559	1.629	1.623	1.594	1.62		92.2503	0.592	0.696	0.587	0.075	0.081	0.114	0.115	0.097	0.093	0.107	0.118	0.123	0.118	0.121	0.115		92.2503	0.501	0.54	0.554	0.127	0.128	0.128	0.123	0.127	0.126	0.14	0.142	0.152	0.135	0.141	0.142
92.5003	0.175	0.219	0.221	0.745	0.972	0.724	1.352	1.446	1.433	1.571	1.556	1.625	1.618	1.592	1.617		92.5003	0.601	0.693	0.594	0.076	0.081	0.116	0.116	0.097	0.093	0.107	0.117	0.122	0.117	0.123	0.116		92.5003	0.501	0.541	0.557	0.126	0.127	0.128	0.123	0.128	0.125	0.141	0.142	0.152	0.136	0.14	0.14
92.7503	0.175	0.219	0.22	0.746	0.972	0.724	1.356	1.447	1.434	1.581	1.559	1.62	1.622	1.59	1.612		92.7503	0.584	0.703	0.587	0.085	0.082	0.118	0.117	0.096	0.093	0.108	0.118	0.123	0.118	0.124	0.118		92.7503	0.498	0.539	0.556	0.126	0.127	0.127	0.123	0.127	0.125	0.141	0.142	0.152	0.135	0.14	0.141
93.0003	0.175	0.219	0.221	0.748	0.974	0.724	1.353	1.447	1.433	1.578	1.56	1.63	1.619	1.594	1.62		93.0003	0.605	0.7	0.596	0.076	0.082	0.116	0.119	0.098	0.093	0.107	0.117	0.122	0.118	0.122	0.115		93.0003	0.5	0.539	0.559	0.126	0.127	0.128	0.123	0.127	0.126	0.14	0.141	0.152	0.135	0.141	0.141
93.2503	0.175	0.219	0.221	0.746	0.972	0.725	1.351	1.447	1.434	1.576	1.558	1.63	1.616	1.595	1.621		93.2503	0.605	0.696	0.591	0.076	0.083	0.119	0.121	0.098	0.093	0.106	0.117	0.122	0.118	0.123	0.116		93.2503	0.499	0.539	0.557	0.127	0.127	0.128	0.126	0.127	0.125	0.14	0.141	0.152	0.136	0.141	0.14
93.5003	0.174	0.218	0.22	0.748	0.974	0.726	1.338	1.441	1.428	1.577	1.553	1.626	1.61	1.59	1.616		93.5003	0.592	0.684	0.583	0.085	0.083	0.118	0.119	0.098	0.094	0.107	0.118	0.123	0.119	0.123	0.116		93.5003	0.499	0.54	0.558	0.126	0.127	0.128	0.127	0.127	0.125	0.14	0.141	0.151	0.135	0.139	0.14
93.7503	0.175	0.22	0.221	0.747	0.971	0.726	1.338	1.439	1.427	1.574	1.553	1.625	1.608	1.589	1.616		93.7503	0.596	0.685	0.588	0.077	0.083	0.114	0.118	0.098	0.094	0.108	0.118	0.123	0.121	0.124	0.116		93.7503	0.496	0.538	0.558	0.127	0.128	0.128	0.128	0.128	0.125	0.141	0.142	0.152	0.135	0.142	0.141
94.0003	0.175	0.219	0.221	0.747	0.971	0.726	1.338	1.441	1.428	1.59	1.555	1.629	1.609	1.591	1.618		94.0003	0.601	0.687	0.589	0.077	0.083	0.114	0.118	0.098	0.094	0.108	0.118	0.124	0.122	0.124	0.116		94.0003	0.495	0.54	0.559	0.126	0.127	0.128	0.129	0.129	0.126	0.141	0.141	0.152	0.135	0.141	0.141
94.2503	0.175	0.219	0.221	0.749	0.973	0.729	1.34	1.439	1.426	1.583	1.555	1.632	1.603	1.59	1.618		94.2503	0.605	0.685	0.589	0.079	0.085	0.115	0.118	0.098	0.094	0.108	0.118	0.124	0.121	0.124	0.117		94.2503	0.495	0.541	0.559	0.126	0.128	0.128	0.129	0.128	0.125	0.14	0.142	0.152	0.135	0.141	0.139
94.5003	0.175	0.219	0.221	0.749	0.972	0.727	1.336	1.436	1.423	1.581	1.551	1.627	1.601	1.587	1.615		94.5003	0.608	0.684	0.591	0.088	0.084	0.111	0.116	0.097	0.093	0.108	0.119	0.124	0.119	0.124	0.116		94.5003	0.494	0.54	0.557	0.127	0.128	0.128	0.13	0.128	0.126	0.141	0.142	0.152	0.136	0.142	0.141
94.7503	0.174	0.219	0.22	0.749	0.973	0.73	1.354	1.44	1.427	1.604	1.557	1.629	1.609	1.592	1.618		94.7503	0.605	0.695	0.589	0.08	0.087	0.116	0.12	0.098	0.094	0.109	0.118	0.124	0.123	0.125	0.117		94.7503	0.496	0.539	0.555	0.126	0.127	0.127	0.123	0.128	0.126	0.14	0.142	0.152	0.139	0.139	0.139
95.0003	0.175	0.219	0.221	0.749	0.972	0.73	1.362	1.441	1.428	1.595	1.56	1.636	1.613	1.596	1.623		95.0003	0.605	0.701	0.589	0.08	0.087	0.118	0.122	0.099	0.094	0.109	0.119	0.124	0.123	0.127	0.117		95.0003	0.492	0.54	0.558	0.126	0.127	0.128	0.123	0.129	0.125	0.141	0.142	0.152	0.139	0.14	0.14
95.2503	0.175	0.219	0.221	0.748	0.971	0.728	1.368	1.444	1.43	1.587	1.565	1.636	1.624	1.601	1.627		95.2503	0.588	0.712	0.587	0.08	0.086	0.119	0.119	0.098	0.093	0.109	0.119	0.124	0.122	0.126	0.117		95.2503	0.488	0.541	0.558	0.126	0.127	0.128	0.124	0.128	0.127	0.141	0.142	0.153	0.14	0.14	0.141
95.5003	0.174	0.217	0.219	0.747	0.971	0.729	1.359	1.443	1.429	1.596	1.563	1.637	1.625	1.602	1.628		95.5003	0.586	0.705	0.586	0.081	0.087	0.122	0.123	0.099	0.095	0.109	0.119	0.124	0.124	0.127	0.117		95.5003	0.488	0.542	0.559	0.127	0.128	0.128	0.124	0.128	0.128	0.141	0.142	0.152	0.139	0.14	0.143
95.7503	0.174	0.219	0.22	0.749	0.974	0.73	1.359	1.442	1.428	1.586	1.56	1.637	1.619	1.601	1.629		95.7503	0.597	0.7	0.59	0.082	0.089	0.127	0.124	0.099	0.094	0.108	0.118	0.124	0.124	0.129	0.118		95.7503	0.488	0.543	0.56	0.127	0.127	0.128	0.123	0.129	0.126	0.142	0.143	0.153	0.139	0.14	0.141
96.0003	0.174	0.219	0.22	0.748	0.969	0.729	1.347	1.436	1.423	1.583	1.554	1.634	1.613	1.596	1.624		96.0003	0.591	0.686	0.583	0.08	0.087	0.122	0.122	0.099	0.094	0.109	0.119	0.124	0.122	0.129	0.118		96.0003	0.487	0.542	0.558	0.127	0.127	0.127	0.124	0.129	0.126	0.141	0.142	0.152	0.14	0.14	0.141
96.2503	0.173	0.219	0.22	0.75	0.973	0.729	1.341	1.433	1.421	1.574	1.55	1.627	1.612	1.594	1.621		96.2503	0.604	0.689	0.59	0.081	0.088	0.122	0.121	0.098	0.094	0.108	0.118	0.124	0.116	0.129	0.117		96.2503	0.486	0.542	0.56	0.127	0.127	0.128	0.13	0.13	0.126	0.142	0.143	0.153	0.14	0.141	0.14
96.5003	0.173	0.219	0.22	0.749	0.969	0.728	1.343	1.437	1.425	1.588	1.558	1.634	1.617	1.6	1.627		96.5003	0.602	0.704	0.588	0.08	0.088	0.122	0.121	0.098	0.094	0.109	0.119	0.125	0.118	0.129	0.118		96.5003	0.486	0.542	0.558	0.127	0.127	0.128	0.132	0.128	0.126	0.142	0.142	0.152	0.14	0.141	0.14
96.7503	0.172	0.218	0.219	0.75	0.972	0.728	1.346	1.436	1.423	1.585	1.56	1.637	1.624	1.602	1.629		96.7503	0.591	0.705	0.585	0.08	0.088	0.122	0.12	0.099	0.095	0.109	0.119	0.124	0.115	0.129	0.118		96.7503	0.486	0.543	0.559	0.127	0.128	0.128	0.131	0.129	0.128	0.141	0.143	0.153	0.14	0.143	0.143
97.0003	0.175	0.219	0.221	0.753	0.975	0.731	1.341	1.435	1.421	1.58	1.555	1.632	1.615	1.595	1.621		97.0003	0.598	0.693	0.588	0.082	0.09	0.125	0.123	0.099	0.095	0.109	0.119	0.124	0.114	0.129	0.118		97.0003	0.486	0.544	0.56	0.127	0.127	0.128	0.131	0.129	0.129	0.141	0.143	0.153	0.14	0.142	0.142
97.2503	0.173	0.218	0.219	0.751	0.973	0.73	1.339	1.435	1.421	1.579	1.556	1.633	1.621	1.601	1.626		97.2503	0.6	0.7	0.588	0.081	0.089	0.123	0.122	0.099	0.095	0.11	0.12	0.125	0.113	0.13	0.118		97.2503	0.485	0.544	0.557	0.127	0.128	0.128	0.131	0.129	0.127	0.141	0.142	0.152	0.139	0.141	0.142
97.5003	0.174	0.218	0.22	0.752	0.975	0.73	1.336	1.435	1.422	1.588	1.557	1.634	1.621	1.604	1.63		97.5003	0.601	0.702	0.586	0.084	0.09	0.125	0.123	0.099	0.095	0.109	0.119	0.124	0.113	0.13	0.118		97.5003	0.485	0.545	0.558	0.126	0.127	0.127	0.131	0.13	0.127	0.142	0.143	0.154	0.139	0.141	0.142
97.7503	0.175	0.219	0.221	0.751	0.973	0.732	1.333	1.429	1.416	1.579	1.553	1.634	1.611	1.599	1.626		97.7503	0.59	0.692	0.582	0.083	0.092	0.126	0.124	0.099	0.095	0.11	0.12	0.126	0.115	0.132	0.119		97.7503	0.485	0.543	0.557	0.127	0.127	0.127	0.131	0.13	0.126	0.141	0.142	0.153	0.139	0.142	0.139
98.0003	0.172	0.218	0.219	0.751	0.972	0.73	1.356	1.43	1.418	1.58	1.557	1.63	1.616	1.598	1.623		98.0003	0.584	0.711	0.581	0.083	0.092	0.129	0.125	0.099	0.095	0.11	0.12	0.125	0.115	0.134	0.119		98.0003	0.484	0.544	0.559	0.126	0.127	0.128	0.131	0.129	0.127	0.141	0.143	0.153	0.139	0.142	0.14
98.2503	0.173	0.218	0.22	0.751	0.972	0.731	1.355	1.432	1.419	1.574	1.557	1.639	1.619	1.603	1.63		98.2503	0.591	0.696	0.584	0.083	0.093	0.133	0.127	0.1	0.096	0.111	0.121	0.126	0.115	0.135	0.119		98.2503	0.486	0.541	0.553	0.127	0.127	0.128	0.132	0.129	0.126	0.142	0.143	0.153	0.139	0.142	0.142
98.5003	0.173	0.219	0.22	0.753	0.973	0.732	1.345	1.43	1.418	1.576	1.555	1.639	1.617	1.603	1.631		98.5003	0.592	0.695	0.583	0.083	0.092	0.131	0.125	0.1	0.096	0.111	0.121	0.126	0.114	0.133	0.119		98.5003	0.487	0.54	0.551	0.126	0.126	0.127	0.131	0.13	0.126	0.142	0.143	0.153	0.139	0.14	0.14
98.7503	0.172	0.218	0.22	0.752	0.973	0.732	1.334	1.424	1.412	1.57	1.549	1.635	1.614	1.599	1.627		98.7503	0.584	0.687	0.578	0.083	0.092	0.126	0.124	0.1	0.096	0.111	0.121	0.126	0.116	0.133	0.119		98.7503	0.485	0.541	0.552	0.128	0.127	0.128	0.132	0.129	0.126	0.142	0.143	0.154	0.14	0.141	0.141
99.0003	0.171	0.217	0.219	0.755	0.975	0.732	1.337	1.423	1.412	1.572	1.551	1.633	1.616	1.599	1.626		99.0003	0.593	0.692	0.584	0.083	0.092	0.125	0.124	0.1	0.096	0.111	0.121	0.126	0.116	0.132	0.119		99.0003	0.492	0.541	0.553	0.126	0.127	0.128	0.13	0.131	0.126	0.141	0.143	0.153	0.139	0.14	0.139
99.2503	0.169	0.217	0.219	0.754	0.974	0.731	1.344	1.424	1.413	1.587	1.552	1.628	1.617	1.594	1.621		99.2503	0.594	0.693	0.583	0.084	0.093	0.126	0.125	0.1	0.096	0.112	0.121	0.126	0.116	0.133	0.119		99.2503	0.485	0.542	0.552	0.127	0.127	0.128	0.131	0.127	0.127	0.142	0.143	0.154	0.139	0.142	0.142
99.5003	0.17	0.217	0.219	0.753	0.974	0.733	1.346	1.426	1.415	1.574	1.557	1.639	1.627	1.605	1.633		99.5003	0.595	0.703	0.585	0.084	0.093	0.126	0.125	0.1	0.096	0.111	0.121	0.126	0.116	0.134	0.12		99.5003	0.485	0.542	0.553	0.126	0.127	0.128	0.13	0.131	0.127	0.142	0.143	0.153	0.139	0.141	0.143
99.7503	0.17	0.217	0.219	0.752	0.975	0.732	1.332	1.424	1.412	1.577	1.552	1.639	1.629	1.604	1.633		99.7503	0.589	0.69	0.583	0.084	0.093	0.125	0.125	0.101	0.096	0.111	0.12	0.126	0.116	0.133	0.119		99.7503	0.48	0.542	0.553	0.127	0.128	0.128	0.13	0.13	0.127	0.143	0.144	0.154	0.139	0.142	0.142
100	0.169	0.216	0.218	0.752	0.974	0.731	1.362	1.435	1.421	1.563	1.565	1.645	1.649	1.615	1.642		100	0.572	0.712	0.572	0.084	0.094	0.13	0.125	0.1	0.096	0.11	0.122	0.126	0.115	0.134	0.119		100	0.478	0.542	0.553	0.127	0.127	0.128	0.128	0.131	0.127	0.143	0.144	0.154	0.141	0.142	0.143
100.25	0.17	0.217	0.219	0.751	0.972	0.731	1.343	1.425	1.413	1.564	1.552	1.636	1.638	1.607	1.634		100.25	0.586	0.699	0.582	0.084	0.093	0.126	0.125	0.1	0.097	0.11	0.12	0.126	0.116	0.133	0.119		100.25	0.481	0.542	0.553	0.127	0.128	0.128	0.126	0.13	0.128	0.142	0.142	0.153	0.14	0.141	0.142
100.5	0.17	0.218	0.22	0.754	0.975	0.734	1.346	1.422	1.411	1.563	1.55	1.637	1.629	1.603	1.632		100.5	0.592	0.695	0.583	0.085	0.094	0.128	0.126	0.1	0.097	0.111	0.121	0.126	0.116	0.134	0.119		100.5	0.49	0.54	0.553	0.127	0.128	0.128	0.125	0.128	0.128	0.143	0.143	0.154	0.139	0.138	0.141
100.75	0.171	0.219	0.22	0.753	0.974	0.734	1.367	1.429	1.418	1.557	1.555	1.636	1.643	1.605	1.632		100.75	0.592	0.714	0.586	0.086	0.096	0.136	0.131	0.101	0.097	0.112	0.122	0.127	0.117	0.139	0.119		100.75	0.482	0.541	0.552	0.128	0.128	0.128	0.125	0.127	0.126	0.143	0.143	0.153	0.139	0.142	0.142
101	0.17	0.218	0.22	0.754	0.974	0.734	1.358	1.424	1.413	1.558	1.553	1.638	1.641	1.606	1.634		101	0.576	0.705	0.577	0.085	0.096	0.134	0.129	0.1	0.097	0.112	0.122	0.127	0.116	0.137	0.12		101	0.486	0.54	0.549	0.127	0.127	0.128	0.124	0.129	0.127	0.143	0.143	0.153	0.139	0.14	0.14
101.25	0.169	0.217	0.219	0.755	0.974	0.733	1.356	1.422	1.412	1.553	1.551	1.639	1.639	1.607	1.636		101.25	0.593	0.708	0.582	0.085	0.096	0.132	0.128	0.101	0.097	0.111	0.121	0.127	0.117	0.136	0.12		101.25	0.483	0.541	0.549	0.127	0.127	0.128	0.124	0.131	0.129	0.143	0.143	0.153	0.139	0.139	0.139
101.5	0.169	0.217	0.218	0.756	0.972	0.733	1.359	1.42	1.41	1.559	1.549	1.633	1.644	1.604	1.63		101.5	0.589	0.71	0.58	0.085	0.095	0.13	0.125	0.1	0.096	0.112	0.121	0.127	0.117	0.135	0.12		101.5	0.484	0.54	0.55	0.127	0.127	0.128	0.124	0.128	0.126	0.143	0.143	0.153	0.139	0.14	0.139
101.75	0.17	0.217	0.219	0.756	0.972	0.735	1.35	1.419	1.409	1.551	1.548	1.638	1.637	1.606	1.635		101.75	0.586	0.699	0.576	0.085	0.094	0.125	0.123	0.101	0.097	0.111	0.121	0.127	0.116	0.134	0.12		101.75	0.485	0.541	0.549	0.128	0.128	0.129	0.124	0.128	0.127	0.143	0.144	0.155	0.139	0.14	0.14
102	0.169	0.216	0.218	0.756	0.975	0.735	1.35	1.419	1.408	1.545	1.551	1.64	1.643	1.609	1.638		102	0.585	0.7	0.575	0.088	0.096	0.127	0.125	0.101	0.097	0.111	0.121	0.127	0.116	0.135	0.12		102	0.483	0.539	0.545	0.127	0.128	0.128	0.124	0.129	0.128	0.143	0.144	0.154	0.14	0.141	0.142
102.25	0.167	0.215	0.217	0.756	0.974	0.735	1.359	1.42	1.408	1.549	1.552	1.642	1.652	1.612	1.642		102.25	0.566	0.696	0.563	0.092	0.097	0.127	0.126	0.101	0.098	0.112	0.122	0.127	0.116	0.136	0.121		102.25	0.484	0.538	0.545	0.128	0.128	0.129	0.125	0.129	0.129	0.144	0.144	0.155	0.14	0.141	0.142
102.5	0.169	0.216	0.219	0.754	0.974	0.734	1.362	1.418	1.407	1.551	1.551	1.64	1.649	1.612	1.641		102.5	0.577	0.698	0.571	0.086	0.098	0.128	0.129	0.102	0.098	0.112	0.122	0.127	0.116	0.137	0.121		102.5	0.483	0.537	0.545	0.127	0.127	0.128	0.124	0.129	0.129	0.143	0.144	0.154	0.14	0.141	0.141
102.75	0.169	0.217	0.219	0.756	0.975	0.738	1.365	1.419	1.409	1.549	1.554	1.645	1.651	1.611	1.639		102.75	0.584	0.703	0.576	0.088	0.099	0.131	0.131	0.101	0.097	0.112	0.122	0.127	0.116	0.138	0.121		102.75	0.48	0.534	0.546	0.127	0.128	0.128	0.124	0.13	0.129	0.143	0.144	0.155	0.139	0.142	0.143
103	0.168	0.216	0.218	0.756	0.976	0.737	1.359	1.415	1.405	1.54	1.55	1.64	1.645	1.609	1.638		103	0.582	0.694	0.575	0.088	0.1	0.134	0.133	0.102	0.098	0.113	0.123	0.128	0.117	0.14	0.121		103	0.482	0.534	0.545	0.127	0.127	0.128	0.124	0.128	0.126	0.144	0.144	0.155	0.14	0.141	0.141
103.25	0.168	0.216	0.218	0.756	0.972	0.737	1.359	1.416	1.407	1.538	1.552	1.641	1.646	1.609	1.64		103.25	0.59	0.702	0.581	0.089	0.101	0.134	0.133	0.103	0.098	0.113	0.122	0.127	0.117	0.141	0.121		103.25	0.481	0.533	0.546	0.127	0.127	0.128	0.124	0.129	0.128	0.144	0.145	0.154	0.139	0.142	0.14
103.5	0.166	0.215	0.218	0.755	0.972	0.735	1.374	1.417	1.409	1.553	1.552	1.635	1.655	1.609	1.635		103.5	0.587	0.716	0.58	0.088	0.101	0.137	0.132	0.102	0.097	0.113	0.122	0.128	0.117	0.143	0.121		103.5	0.479	0.532	0.546	0.127	0.127	0.128	0.124	0.13	0.127	0.144	0.144	0.154	0.139	0.141	0.141
103.75	0.167	0.217	0.219	0.757	0.974	0.739	1.359	1.415	1.406	1.543	1.548	1.636	1.651	1.609	1.636		103.75	0.587	0.706	0.578	0.089	0.102	0.137	0.133	0.103	0.098	0.113	0.122	0.128	0.117	0.142	0.121		103.75	0.478	0.533	0.548	0.127	0.127	0.128	0.124	0.13	0.126	0.143	0.144	0.154	0.14	0.142	0.14
104	0.167	0.217	0.219	0.758	0.974	0.736	1.36	1.414	1.406	1.542	1.549	1.637	1.654	1.61	1.638		104	0.59	0.71	0.577	0.088	0.1	0.133	0.13	0.103	0.099	0.113	0.122	0.128	0.117	0.14	0.121		104	0.479	0.533	0.546	0.127	0.127	0.128	0.124	0.131	0.128	0.143	0.144	0.154	0.139	0.142	0.142
104.25	0.167	0.217	0.218	0.758	0.973	0.736	1.348	1.409	1.401	1.545	1.543	1.636	1.65	1.606	1.636		104.25	0.588	0.704	0.577	0.088	0.1	0.129	0.127	0.102	0.098	0.113	0.122	0.128	0.117	0.139	0.121		104.25	0.479	0.532	0.548	0.127	0.128	0.128	0.124	0.132	0.129	0.143	0.145	0.154	0.14	0.143	0.141
104.5	0.167	0.216	0.218	0.758	0.973	0.738	1.351	1.412	1.403	1.554	1.547	1.637	1.652	1.611	1.64		104.5	0.565	0.71	0.567	0.089	0.103	0.131	0.13	0.103	0.099	0.113	0.123	0.128	0.117	0.143	0.122		104.5	0.487	0.532	0.547	0.127	0.128	0.128	0.124	0.131	0.129	0.143	0.144	0.155	0.139	0.14	0.142
104.75	0.167	0.216	0.218	0.757	0.973	0.738	1.339	1.409	1.401	1.542	1.546	1.639	1.647	1.61	1.641		104.75	0.577	0.701	0.571	0.088	0.102	0.129	0.129	0.103	0.098	0.114	0.123	0.129	0.117	0.142	0.122		104.75	0.486	0.531	0.548	0.128	0.128	0.128	0.125	0.13	0.129	0.143	0.145	0.155	0.139	0.142	0.142
105	0.167	0.217	0.218	0.756	0.97	0.735	1.352	1.408	1.399	1.54	1.545	1.635	1.642	1.608	1.636		105	0.573	0.707	0.577	0.089	0.104	0.133	0.134	0.103	0.098	0.113	0.123	0.129	0.116	0.144	0.122		105	0.483	0.53	0.548	0.127	0.127	0.128	0.125	0.131	0.128	0.143	0.144	0.155	0.139	0.142	0.141
105.25	0.173	0.217	0.22	0.76	0.974	0.739	1.35	1.411	1.403	1.551	1.549	1.64	1.649	1.613	1.642		105.25	0.582	0.716	0.577	0.091	0.106	0.141	0.135	0.103	0.098	0.114	0.123	0.129	0.117	0.146	0.123		105.25	0.482	0.531	0.547	0.127	0.128	0.128	0.125	0.131	0.129	0.144	0.145	0.155	0.14	0.142	0.141
105.5	0.173	0.217	0.22	0.758	0.974	0.738	1.349	1.41	1.402	1.534	1.545	1.638	1.653	1.612	1.641		105.5	0.577	0.706	0.573	0.089	0.103	0.137	0.134	0.104	0.099	0.114	0.123	0.129	0.116	0.143	0.122		105.5	0.482	0.529	0.548	0.128	0.128	0.129	0.125	0.132	0.129	0.144	0.145	0.155	0.14	0.143	0.143
105.75	0.172	0.216	0.218	0.758	0.973	0.736	1.361	1.412	1.403	1.531	1.55	1.638	1.659	1.617	1.645		105.75	0.566	0.716	0.566	0.09	0.105	0.14	0.132	0.103	0.098	0.114	0.123	0.129	0.116	0.144	0.123		105.75	0.481	0.53	0.547	0.127	0.128	0.129	0.125	0.13	0.129	0.144	0.145	0.156	0.139	0.142	0.143
106	0.172	0.216	0.219	0.759	0.976	0.74	1.362	1.411	1.404	1.535	1.55	1.64	1.661	1.618	1.648		106	0.573	0.714	0.572	0.09	0.105	0.143	0.134	0.103	0.098	0.114	0.123	0.129	0.117	0.147	0.123		106	0.48	0.527	0.542	0.126	0.127	0.128	0.125	0.131	0.129	0.143	0.144	0.155	0.139	0.141	0.143
106.25	0.172	0.216	0.218	0.76	0.975	0.74	1.351	1.407	1.4	1.52	1.545	1.639	1.658	1.615	1.644		106.25	0.565	0.706	0.568	0.09	0.104	0.14	0.133	0.103	0.098	0.114	0.123	0.129	0.117	0.145	0.123		106.25	0.479	0.527	0.545	0.126	0.127	0.128	0.125	0.13	0.128	0.143	0.144	0.155	0.139	0.142	0.143
106.5	0.17	0.216	0.219	0.76	0.974	0.739	1.344	1.404	1.397	1.522	1.541	1.637	1.654	1.611	1.642		106.5	0.57	0.7	0.573	0.09	0.104	0.138	0.131	0.104	0.099	0.114	0.123	0.129	0.117	0.145	0.123		106.5	0.481	0.527	0.547	0.127	0.127	0.128	0.124	0.129	0.128	0.143	0.144	0.155	0.139	0.14	0.142
106.75	0.169	0.216	0.218	0.76	0.975	0.74	1.341	1.402	1.395	1.514	1.541	1.637	1.657	1.611	1.643		106.75	0.574	0.696	0.576	0.09	0.105	0.136	0.129	0.103	0.098	0.114	0.123	0.129	0.118	0.144	0.123		106.75	0.479	0.528	0.547	0.127	0.128	0.128	0.125	0.131	0.129	0.144	0.144	0.155	0.139	0.142	0.141
107	0.17	0.215	0.218	0.761	0.975	0.739	1.344	1.402	1.395	1.519	1.543	1.637	1.658	1.612	1.643		107	0.575	0.706	0.576	0.091	0.106	0.137	0.13	0.104	0.099	0.115	0.124	0.13	0.119	0.146	0.123		107	0.477	0.528	0.547	0.126	0.127	0.128	0.126	0.131	0.128	0.144	0.145	0.155	0.139	0.14	0.14
107.25	0.168	0.215	0.218	0.763	0.977	0.74	1.335	1.401	1.395	1.511	1.543	1.644	1.661	1.613	1.644		107.25	0.572	0.7	0.578	0.091	0.106	0.135	0.129	0.104	0.099	0.114	0.124	0.129	0.118	0.144	0.122		107.25	0.475	0.527	0.547	0.128	0.128	0.129	0.126	0.131	0.129	0.144	0.145	0.156	0.14	0.142	0.143
107.5	0.167	0.215	0.218	0.761	0.976	0.74	1.347	1.401	1.395	1.508	1.542	1.629	1.662	1.612	1.643		107.5	0.568	0.707	0.571	0.092	0.109	0.138	0.132	0.104	0.099	0.115	0.124	0.129	0.12	0.148	0.122		107.5	0.475	0.527	0.548	0.126	0.127	0.128	0.125	0.132	0.129	0.143	0.145	0.155	0.139	0.142	0.142
107.75	0.167	0.216	0.219	0.762	0.977	0.742	1.347	1.401	1.396	1.507	1.542	1.631	1.66	1.609	1.64		107.75	0.571	0.707	0.574	0.093	0.11	0.143	0.135	0.105	0.099	0.115	0.124	0.13	0.122	0.149	0.122		107.75	0.473	0.525	0.547	0.127	0.128	0.128	0.126	0.133	0.131	0.144	0.145	0.156	0.14	0.143	0.144
108	0.167	0.216	0.219	0.762	0.978	0.742	1.341	1.4	1.395	1.502	1.542	1.637	1.66	1.612	1.645		108	0.571	0.704	0.576	0.093	0.109	0.143	0.136	0.105	0.099	0.115	0.124	0.13	0.124	0.15	0.123		108	0.474	0.524	0.547	0.127	0.128	0.128	0.125	0.132	0.129	0.143	0.144	0.155	0.139	0.141	0.143
108.25	0.168	0.216	0.219	0.761	0.977	0.743	1.344	1.401	1.396	1.499	1.543	1.635	1.664	1.612	1.644		108.25	0.57	0.711	0.578	0.093	0.11	0.144	0.137	0.105	0.099	0.115	0.124	0.13	0.125	0.15	0.123		108.25	0.473	0.522	0.543	0.126	0.127	0.128	0.125	0.131	0.129	0.144	0.145	0.155	0.139	0.142	0.142
108.5	0.171	0.216	0.219	0.762	0.977	0.743	1.341	1.397	1.393	1.498	1.538	1.633	1.656	1.61	1.643		108.5	0.573	0.704	0.579	0.093	0.11	0.145	0.137	0.106	0.1	0.115	0.125	0.13	0.126	0.151	0.123		108.5	0.473	0.52	0.542	0.127	0.127	0.128	0.125	0.131	0.13	0.144	0.145	0.155	0.139	0.141	0.141
108.75	0.169	0.215	0.218	0.762	0.977	0.742	1.34	1.395	1.391	1.501	1.536	1.63	1.657	1.609	1.641		108.75	0.569	0.709	0.575	0.093	0.111	0.143	0.136	0.106	0.1	0.116	0.125	0.131	0.126	0.152	0.123		108.75	0.465	0.521	0.545	0.127	0.128	0.128	0.125	0.13	0.129	0.143	0.144	0.155	0.139	0.143	0.141
109	0.17	0.215	0.218	0.763	0.979	0.743	1.337	1.394	1.391	1.505	1.536	1.635	1.657	1.611	1.643		109	0.568	0.703	0.576	0.093	0.112	0.145	0.137	0.106	0.1	0.116	0.125	0.13	0.127	0.152	0.123		109	0.466	0.522	0.546	0.127	0.128	0.129	0.126	0.13	0.129	0.144	0.145	0.156	0.139	0.142	0.142
109.25	0.169	0.215	0.218	0.764	0.979	0.742	1.331	1.392	1.389	1.507	1.537	1.636	1.656	1.612	1.644		109.25	0.572	0.7	0.578	0.094	0.113	0.143	0.137	0.106	0.1	0.117	0.126	0.131	0.128	0.152	0.123		109.25	0.467	0.522	0.547	0.127	0.128	0.129	0.127	0.131	0.128	0.144	0.145	0.155	0.139	0.142	0.141
109.5	0.169	0.215	0.218	0.763	0.976	0.738	1.348	1.395	1.393	1.513	1.54	1.633	1.667	1.615	1.645		109.5	0.563	0.718	0.572	0.092	0.11	0.138	0.132	0.105	0.1	0.115	0.124	0.13	0.127	0.148	0.123		109.5	0.469	0.522	0.546	0.127	0.128	0.128	0.126	0.131	0.129	0.145	0.145	0.155	0.14	0.141	0.142
109.75	0.166	0.215	0.218	0.764	0.975	0.741	1.334	1.396	1.391	1.51	1.539	1.632	1.663	1.616	1.647		109.75	0.563	0.712	0.575	0.093	0.112	0.139	0.134	0.105	0.1	0.115	0.125	0.13	0.127	0.149	0.124		109.75	0.47	0.522	0.546	0.127	0.128	0.129	0.127	0.131	0.129	0.145	0.145	0.156	0.138	0.141	0.14
110	0.166	0.215	0.218	0.763	0.975	0.741	1.326	1.394	1.39	1.508	1.54	1.632	1.665	1.618	1.648		110	0.56	0.712	0.574	0.094	0.111	0.137	0.135	0.106	0.101	0.116	0.125	0.13	0.128	0.148	0.124		110	0.469	0.521	0.543	0.127	0.128	0.128	0.126	0.132	0.129	0.145	0.145	0.156	0.14	0.14	0.141
110.25	0.165	0.214	0.218	0.764	0.977	0.743	1.324	1.395	1.391	1.509	1.539	1.633	1.667	1.622	1.651		110.25	0.56	0.709	0.567	0.095	0.114	0.141	0.139	0.106	0.101	0.116	0.125	0.131	0.129	0.152	0.124		110.25	0.47	0.521	0.544	0.127	0.128	0.128	0.127	0.131	0.13	0.144	0.145	0.156	0.14	0.142	0.141
110.5	0.166	0.215	0.218	0.763	0.976	0.743	1.314	1.392	1.389	1.511	1.535	1.629	1.664	1.619	1.646		110.5	0.569	0.706	0.575	0.095	0.114	0.143	0.139	0.106	0.101	0.116	0.125	0.131	0.127	0.152	0.124		110.5	0.466	0.521	0.543	0.126	0.128	0.129	0.128	0.132	0.129	0.145	0.146	0.156	0.14	0.143	0.142
110.75	0.163	0.215	0.217	0.762	0.975	0.743	1.315	1.397	1.393	1.516	1.544	1.647	1.673	1.628	1.653		110.75	0.563	0.719	0.571	0.095	0.114	0.145	0.141	0.106	0.1	0.116	0.126	0.131	0.127	0.154	0.124		110.75	0.467	0.522	0.544	0.127	0.128	0.129	0.128	0.132	0.129	0.144	0.146	0.157	0.14	0.143	0.142
111	0.166	0.214	0.216	0.763	0.977	0.744	1.314	1.395	1.392	1.511	1.541	1.64	1.671	1.626	1.653		111	0.567	0.712	0.567	0.096	0.115	0.149	0.142	0.106	0.101	0.116	0.126	0.131	0.128	0.157	0.124		111	0.46	0.521	0.543	0.126	0.127	0.128	0.134	0.131	0.129	0.144	0.145	0.156	0.132	0.142	0.142
111.25	0.166	0.214	0.217	0.763	0.976	0.744	1.31	1.388	1.386	1.511	1.544	1.633	1.662	1.623	1.649		111.25	0.556	0.704	0.564	0.095	0.115	0.147	0.142	0.107	0.101	0.116	0.126	0.131	0.129	0.157	0.124		111.25	0.465	0.52	0.545	0.126	0.127	0.128	0.135	0.13	0.129	0.145	0.145	0.156	0.132	0.142	0.142
111.5	0.165	0.214	0.218	0.765	0.98	0.744	1.311	1.387	1.386	1.513	1.547	1.634	1.664	1.623	1.65		111.5	0.567	0.703	0.568	0.095	0.114	0.146	0.14	0.107	0.101	0.116	0.126	0.131	0.129	0.155	0.124		111.5	0.465	0.521	0.546	0.127	0.128	0.129	0.131	0.131	0.129	0.145	0.145	0.157	0.132	0.142	0.142
111.75	0.164	0.214	0.218	0.766	0.977	0.744	1.319	1.388	1.387	1.514	1.545	1.633	1.666	1.622	1.649		111.75	0.565	0.709	0.565	0.095	0.115	0.143	0.138	0.107	0.101	0.117	0.126	0.131	0.13	0.157	0.125		111.75	0.464	0.52	0.55	0.127	0.128	0.129	0.135	0.131	0.129	0.145	0.145	0.156	0.132	0.142	0.141
[truncated: 36 more rows]

## Sheet: Fig2_vanillate
P. putida KT2440																	S. lignivorans SYK-6																	S. lignivorans B1D3A
[truncated: 481 more rows]

## Sheet: Fig2_syringate
P. putida KT2440																	S. lignivorans SYK-6																	S. lignivorans B1D3A
[truncated: 485 more rows]

## Sheet: Fig2_p-coumarate
P. putida KT2440																	S. lignivorans SYK-6																	S. lignivorans B1D3A
[truncated: 498 more rows]

[truncated: 10 more sheets: Fig2_4HBald, Fig2_Vanillin, Fig2_4HB, Fig2_acetate, Fig2_lactate, Fig2+S3, Fig4, Fig4b_stats, Fig4c_stats, FigS3-S4_NaCl+DMSO]
